# Supplementary material for: Candidate Genes as Biomarkers in Lipopolysaccharide-Induced Acute Respiratory Distress Syndrome Based on mRNA Expression Profile by Next-Generation RNA-Seq Analysis
Source: Biomed Res Int. 2018 Apr 8;2018:4384797. doi: 10.1155/2018/4384797 (PMC5911337; doi:10.1155/2018/4384797)
Supplement: Supplementary Materials — Figure S1: LPS-induced ARDS in rats. Sprague-Dawley rats were treated with LPS (20 mg/kg) via caudal vein 7 h before the lung tissues were collected, and the effect of LPS was assessed by histology in H&E-stained sections (bars = 100 μm; original magnification ×400). Figure S2: GO analysis of the biological function of genes. (A-B) Upregulated GO BP and CC terms for the DEGs were analyzed. Top 10 upregulated GO terms ranked by fold enrichment and enrichment score were shown. (C-D) Downregulated GO BP and CC terms for the DEGs were analyzed. Top 10 downregulated GO terms ranked by fold enrichment and enrichment score were shown. Figure S3: STRING analysis of interaction in the altered genes in rat ARDS. Nodes represent genes. Genes with more links are shown in a bigger size. Purple lines represent experimental evidence; yellow lines represent text-mining evidence; light lines represent database evidence. Table S1: the detailed characteristics of qRT-PCR for 11 candidate genes. Table S2: RNA-Seq reads and mapping rate of lung tissues from ARDS rats and normal rats. Table S3: upregulated KEGG pathway analysis. Table S4: downregulated KEGG pathway analysis. Supplemental Excel 1: a total of 5244 genes were considered to be significant, with the P value of <0.05 and FC > 1.5. Of those genes, 1413 genes were upregulated and 3831 downregulated. [file 4384797.f1.zip › 4384797.f1/mat.4384797.v2.xlsx]

## Sheet: up_L_vs_C
#log2(fold_change) >= 0.58 #p-value cut-off <= 0.05 #q-value cut-off <= 1.00 #Gene biotype: protein_coding #Condition pairs: up_L_vs_C Column A: Track_id, The database name in gene level. Column B: Gene_Name, The name of gene. Column C: Locus, The genomic coordinates of gene. Column D: Strand, Strand of the gene. Column E: Gene_Type, The biological type of gene. Column F: log2(fold_change), if th…
up_L_vs_C(gene_level)
Annotation					DE Statistic				FPKM
Track_id	Gene_Name	Locus	Strand	Gene_Type	log2(fold_change)	Fold_Change	p_value	q_value	L_FPKM	C_FPKM	C1	C2	C3	L1	L2	L3
ENSRNOG00000000017	Steap1	chr4:25435873-25446461	+	protein_coding	1.32147	2.49921	0.00111595	0.0101433	1.6298	0.308328	0.260898	0.264772	0.190571	1.50518	2.31772	2.56594
ENSRNOG00000000034	Nuak2	chr13:49092306-49109050	+	protein_coding	2.87637	7.34298	0.000188919	0.00458065	4.12556	1.2492	1.03842	2.04898	1.16118	19.5682	15.4972	14.6728
ENSRNOG00000000073	Tmed5	chr14:2613406-2633950	+	protein_coding	1.28689	2.44001	0.00156472	0.0119562	5.27751	3.99062	12.8166	15.529	16.5889	39.7711	43.0494	31.4916
ENSRNOG00000000122	Ak2	chr5:147185474-147204050	+	protein_coding	1.29033	2.44583	0.0122451	0.0385624	4.80852	3.5182	13.4586	9.19086	9.20734	35.6339	28.3838	19.4428
ENSRNOG00000000123	Rnf19b	chr5:147246037-147270957	+	protein_coding	3.5389	11.6229	0.00211678	0.0139262	7.59315	4.05425	16.2336	15.6877	14.9433	312.891	231.296	97.7358
ENSRNOG00000000187	Csf2rb	chr7:119554354-119568776	+	protein_coding	2.77795	6.85876	0.000543525	0.00715337	5.54043	2.76248	5.86891	6.28576	5.2432	31.1587	56.5664	53.4551
ENSRNOG00000000195	Vwa5a	chr8:42443442-42466907	+	protein_coding	1.42546	2.686	0.0161039	0.0456886	5.43669	4.01123	15.2833	13.278	17.0339	30.6825	68.0163	36.1576
ENSRNOG00000000221	Abhd5	chr8:130973201-131001458	+	protein_coding	0.872472	1.8308	0.000227581	0.00491055	6.52006	5.64759	48.4934	52.1899	46.8526	91.2488	96.4887	84.9582
ENSRNOG00000000239	Ccl7	chr10:69423086-69424979	+	protein_coding	7.10608	137.766	1.19045e-05	0.00253197	7.78508	0.678997	0.511108	0.824189	0.488779	171.468	200.857	307.23
ENSRNOG00000000245	Slc16a6	chr10:97735548-97756521	-	protein_coding	1.40291	2.64435	0.0178045	0.0489287	3.23941	1.8365	2.53821	2.58619	2.59013	14.3536	5.66871	7.22683
ENSRNOG00000000250	Jmjd6	chr10:105781753-105787803	-	protein_coding	0.777826	1.71455	0.00252017	0.0153777	3.91038	3.13256	8.14275	7.02159	8.19695	12.5099	13.8221	15.9771
ENSRNOG00000000251	St6galnac1	chr10:105713317-105723700	-	protein_coding	0.600124	1.51585	0.000124911	0.00395851	0.600124	0	0	0	0	0.603312	0.48383	0.464077
ENSRNOG00000000398	Zufsp	chr20:32471672-32501722	-	protein_coding	1.41003	2.65743	0.00644325	0.0261306	5.30529	3.89526	14.8192	13.5917	13.2719	52.851	39.3862	27.4269
ENSRNOG00000000428	Cyp21a1	chr20:4486219-4489550	-	protein_coding	0.773482	1.70939	0.0047771	0.0218883	1.02952	0.256034	0.266222	0.238612	0.0858667	1.20953	1.21986	0.734287
ENSRNOG00000000455	Tap2	chr20:3995544-4009587	+	protein_coding	2.42732	5.37894	9.35606e-07	0.00170081	6.05276	3.62544	11.4109	11.7882	10.8437	63.8968	68.7712	63.6086
ENSRNOG00000000456	Psmb8	chr20:3990613-3993769	+	protein_coding	1.89825	3.72761	0.00754491	0.0286565	6.16888	4.27063	17.6387	14.932	23.2147	80.9262	98.4722	44.7015
ENSRNOG00000000457	Tap1	chr20:3979035-3989669	+	protein_coding	3.53733	11.6103	0.00143685	0.0114559	7.24045	3.70312	12.8805	13.3537	10.0888	275.159	116.594	105.473
ENSRNOG00000000459	Psmb9	chr20:3973420-3978845	-	protein_coding	2.81349	7.02982	0.00253103	0.0153819	7.41843	4.60495	34.9508	15.2279	23.7007	173.623	123.855	228.619
ENSRNOG00000000465	Slc39a7	chr20:3819414-3822778	-	protein_coding	0.841441	1.79184	0.0315789	0.0725402	5.52025	4.67881	27.3087	23.5383	23.1893	57.1517	31.792	49.6935
ENSRNOG00000000477	Daxx	chr20:5480103-5485926	-	protein_coding	2.16922	4.49781	0.000737976	0.00822103	5.88314	3.71392	13.537	11.467	11.4671	67.5729	67.9833	42.4622
ENSRNOG00000000485	Bak1	chr20:5609625-5618260	-	protein_coding	1.02585	2.03616	0.00524564	0.0231174	3.9112	2.88534	6.84499	7.01307	5.41701	11.5704	13.8583	17.2324
ENSRNOG00000000499	Tcp11	chr20:7645626-7654428	-	protein_coding	1.68853	3.22329	0.00355142	0.0184261	2.84353	1.155	1.99595	0.739883	1.11842	6.81631	7.12132	4.82555
ENSRNOG00000000503	Ppard	chr20:7818289-7885333	+	protein_coding	1.29166	2.4481	0.0281044	0.0667628	3.21651	1.92485	2.93927	3.06224	2.4208	14.4559	6.95582	5.53158
ENSRNOG00000000520	Srsf3	chr20:6288267-6298213	+	protein_coding	0.633763	1.55161	0.0246451	0.0611103	5.20547	4.57171	25.3431	22.3362	20.8759	41.7415	38.7443	28.5722
ENSRNOG00000000521	Cdkn1a	chr20:6351458-6358864	+	protein_coding	1.67641	3.19631	0.000407569	0.00633256	4.51763	2.84123	6.01858	7.40346	5.23986	20.2167	24.9449	20.8323
ENSRNOG00000000529	Pim1	chr20:8165307-8169555	+	protein_coding	2.95732	7.76678	4.74922e-05	0.00312011	6.03904	3.08173	8.101	8.49918	6.01943	67.9767	68.9228	57.9493
ENSRNOG00000000532	Cmtr1	chr20:8312792-8368764	+	protein_coding	0.731013	1.6598	0.000539474	0.0071186	5.07598	4.34496	19.3047	19.8802	18.7954	29.7246	34.9548	33.7393
ENSRNOG00000000562	Prf1	chr20:30915213-30921382	+	protein_coding	0.867833	1.82492	0.0470647	0.0972662	5.49792	4.63009	28.8759	16.9617	27.2955	58.1673	40.4944	36.5875
ENSRNOG00000000563	Adamts14	chr20:30812353-30888751	-	protein_coding	0.624114	1.54126	0.0298928	0.0697803	2.20129	1.57717	1.37726	2.39948	2.28732	3.88217	3.04255	3.92825
ENSRNOG00000000587	Rpf2	chr20:45321405-45342948	-	protein_coding	1.23668	2.35655	0.000138602	0.0041251	4.18002	2.94334	6.93395	7.00253	6.16781	16.7889	15.8545	18.8641
ENSRNOG00000000648	Jmjd1c	chr20:22751743-22882672	-	protein_coding	0.842049	1.79259	0.0123167	0.0386789	5.47593	4.63389	22.4464	24.4711	24.6266	52.5872	46.6717	33.5096
ENSRNOG00000000653	Nr5a2	chr13:53750473-53870428	-	protein_coding	1.35459	2.55725	0.00121512	0.0106135	1.83229	0.4777	0.355053	0.550989	0.284816	1.96859	3.19336	2.62754
ENSRNOG00000000692	Ung	chr12:48246569-48254822	-	protein_coding	0.807834	1.75058	0.0077278	0.0291047	3.24339	2.43556	5.14588	4.50464	3.67968	7.19006	8.58413	9.82021
ENSRNOG00000000720	MGC95208	chr11:1814294-1819094	-	protein_coding	1.37055	2.58569	0.00897547	0.0318134	3.17011	1.79956	1.96436	2.2813	3.33695	10.4515	8.69122	5.57126
ENSRNOG00000000763	RT1-M3-1	chr20:1814661-1818800	-	protein_coding	1.79732	3.47574	8.38872e-05	0.00363445	5.39178	3.59447	12.2445	10.1274	10.9591	39.0696	46.0843	38.2261
ENSRNOG00000000768	Ubd	chr20:1876173-1897814	-	protein_coding	3.05499	8.3108	0.000479768	0.00675497	3.29085	0.235867	0.0253408	0.0297905	0.54665	8.17815	12.0449	6.82966
ENSRNOG00000000777	RT1-S3	chr20:3176107-3179818	+	protein_coding	1.71005	3.27173	0.00192089	0.0132083	8.34744	6.63739	125.983	91.9473	82.5943	263.145	362.49	358.877
ENSRNOG00000000782	Trim10	chr20:2182941-2191640	-	protein_coding	0.760149	1.69367	0.00862807	0.0310687	1.08439	0.32424	0.268315	0.26702	0.221257	1.39089	0.705822	1.3378
ENSRNOG00000000804	Mrps18b	chr20:3344870-3350927	+	protein_coding	0.870784	1.82866	0.00285738	0.0164049	3.10721	2.23642	4.47513	3.74804	3.02516	7.26318	8.03321	7.57232
ENSRNOG00000000827	Ier3	chr20:3438798-3440769	-	protein_coding	1.48939	2.8077	0.000398641	0.00628108	5.93257	4.44318	24.6772	19.3325	18.7174	54.9519	61.9969	63.6409
ENSRNOG00000000836	Ltb	chr20:4861335-4863198	-	protein_coding	2.05089	4.14361	0.000348349	0.00591281	3.45096	1.40007	1.87002	1.5292	1.53235	9.76964	12.5241	7.97878
ENSRNOG00000000837	LOC103694380	chr20:4855829-4858447	+	protein_coding	2.26456	4.80508	0.0142187	0.0421231	2.84788	0.583322	0.541596	0.421422	0.534967	10.6903	8.31603	2.4264
ENSRNOG00000000855	Lst1	chr20:5176016-5179263	-	protein_coding	0.93313	1.90941	0.038218	0.0835294	3.67663	2.7435	7.07315	7.35228	3.45431	10.3955	12.8214	12.2753
ENSRNOG00000000867	Vars	chr20:4993560-5008262	+	protein_coding	1.59129	3.01318	2.36145e-05	0.00260171	4.77776	3.18647	8.30073	7.63036	8.39994	28.2889	26.7306	24.4145
ENSRNOG00000000878	Slc44a4	chr20:4593389-4609631	+	protein_coding	1.42292	2.68127	0.0004624	0.00666471	4.91058	3.48766	10.0518	11.1046	9.55084	24.7494	33.4598	29.6627
ENSRNOG00000000902	Hsph1	chr12:6322668-6341902	-	protein_coding	1.32831	2.51108	0.0377251	0.0826508	5.74869	4.42038	20.593	19.566	21.1075	33.3104	46.658	94.0647
ENSRNOG00000000906	Medag	chr12:6711747-6740714	-	protein_coding	1.92071	3.78608	0.00891198	0.031681	4.1182	2.1975	3.05524	3.82061	3.93652	24.3205	19.2361	9.22144
ENSRNOG00000000909	Uspl1	chr12:6929978-6956984	-	protein_coding	0.593437	1.50884	0.00706716	0.0274911	3.89867	3.30523	9.31841	8.39066	8.96814	16.3669	12.8277	12.8159
ENSRNOG00000000923	Cct6a	chr12:30491586-30501813	-	protein_coding	0.847424	1.79929	7.70594e-05	0.00352887	6.12088	5.27345	37.18	37.8306	38.0293	64.9536	67.8098	73.2698
ENSRNOG00000000924	Slc7a1	chr12:8032809-8108972	+	protein_coding	1.32451	2.50447	0.0383726	0.0837905	2.26444	0.939937	0.44866	0.672135	1.91481	6.03235	2.35681	3.69861
ENSRNOG00000000938	Ran	chr12:31320624-31323810	-	protein_coding	0.989048	1.98488	0.00292993	0.0167012	6.94041	5.95136	66.2745	68.3029	49.8171	117.751	116.772	131.475
ENSRNOG00000000954	Polr1d	chr12:9693779-9727489	-	protein_coding	0.918075	1.88959	0.0219282	0.0564982	6.05588	5.13781	34.4813	36.2047	32.06	87.7465	66.6337	48.0559
ENSRNOG00000000989	Bud31	chr12:11232964-11240400	-	protein_coding	0.636414	1.55446	0.00145213	0.0115199	5.56426	4.92785	30.392	28.4404	29.5159	45.5052	51.2844	42.5668
ENSRNOG00000000991	Arpc1b	chr12:11252296-11265865	-	protein_coding	0.634769	1.55269	0.001859	0.01301	7.37184	6.73707	116.1	105.979	95.9004	160.007	161.075	173.13
ENSRNOG00000001033	Nufip1	chr15:58170967-58201970	+	protein_coding	0.966006	1.95342	0.00748102	0.0285044	4.41736	3.45135	10.9347	8.30198	10.7894	25.006	19.7997	17.0359
ENSRNOG00000001106	Denr	chr12:38096034-38116919	-	protein_coding	0.652771	1.57219	0.00136523	0.0111543	4.74243	4.08966	15.6027	17.5245	15.0475	24.5312	25.0853	27.7989
ENSRNOG00000001142	Prkab1	chr12:46316236-46326790	+	protein_coding	0.770519	1.70588	0.00423258	0.020389	5.653	4.88248	24.6524	30.8591	30.4019	43.779	51.9919	52.6884
ENSRNOG00000001181	Wdr4	chr20:10239154-10257044	-	protein_coding	1.08805	2.12586	0.0015141	0.0117895	2.36167	1.27362	1.60881	1.57218	1.10597	4.80008	4.12494	3.56748
ENSRNOG00000001187	Oasl	chr12:47444104-47456894	-	protein_coding	4.65129	25.1291	0.000199122	0.00471567	6.94616	2.29487	5.33424	4.76751	2.2344	145.479	132.911	94.5916
ENSRNOG00000001189	Sik1	chr20:10668411-10680283	-	protein_coding	1.86441	3.64119	0.00265919	0.0157938	5.86615	4.00174	18.1965	13.9047	13.3677	80.9532	50.329	46.1771
ENSRNOG00000001203	Rrp1	chr20:10981998-10993280	+	protein_coding	1.19025	2.28192	0.00169675	0.0124201	4.8093	3.61905	12.032	10.2896	11.6078	32.9329	26.0181	23.0411
ENSRNOG00000001210	Pwp2	chr20:11228844-11243205	+	protein_coding	1.22133	2.33161	0.00214162	0.013997	3.99176	2.77044	6.59026	5.17009	5.78271	18.0027	14.9962	12.2461
ENSRNOG00000001222	Ube2g2	chr20:11700089-11721838	-	protein_coding	2.76868	6.81484	0.000394409	0.00624824	5.67341	2.90473	8.22457	5.8309	5.66517	63.9375	50.301	38.9007
ENSRNOG00000001253	Eif3b	chr12:16285733-16310190	-	protein_coding	0.848472	1.80059	0.000761199	0.00835473	5.98539	5.13692	33.3584	33.5895	35.6538	69.2448	62.4879	56.0214
ENSRNOG00000001302	Adora2a	chr20:14265252-14282873	-	protein_coding	1.70182	3.25312	0.0405854	0.0874291	3.7491	2.04727	2.25865	1.50974	7.6339	12.6348	15.4965	9.80766
ENSRNOG00000001312	Pdgfa	chr12:17734133-17755285	+	protein_coding	0.924098	1.8975	0.0108883	0.0357284	5.02367	4.09957	17.5333	13.3975	17.8817	25.772	31.5095	38.5488
ENSRNOG00000001336	Orai1	chr12:38981927-38995570	-	protein_coding	1.2339	2.35201	0.000124097	0.00395851	5.47578	4.24189	19.0758	16.7506	18.0073	47.7157	42.1234	40.9511
ENSRNOG00000001350	Naa25	chr12:40628005-40680397	-	protein_coding	1.16837	2.24757	0.000515079	0.00695524	3.88655	2.71818	5.44943	5.85182	5.44812	15.7068	14.079	11.8421
ENSRNOG00000001351	Trafd1	chr12:40695520-40709462	+	protein_coding	2.14973	4.43744	0.000368077	0.00609028	7.61014	5.46041	50.9468	42.3369	36.9166	227.851	198.362	162.474
ENSRNOG00000001369	Oas1a	chr12:41200718-41211909	+	protein_coding	2.04272	4.12023	0.000563839	0.00726942	6.23464	4.19192	19.7561	19.5352	13.3231	75.175	83.8181	65.0913
ENSRNOG00000001414	Serpine1	chr12:22641104-22651482	+	protein_coding	4.87009	29.2444	0.000272239	0.00529268	7.81777	2.94769	8.60306	9.40803	3.59461	182.28	251.255	247.427
ENSRNOG00000001416	Vgf	chr12:22677607-22680630	-	protein_coding	1.02958	2.04142	0.0335782	0.0758272	1.04465	0.0150703	0.031834	0	0	0.32668	1.40091	1.75593
ENSRNOG00000001431	Rasa4	chr12:23596981-23624316	-	protein_coding	3.0991	8.56885	0.0021479	0.0140076	5.25883	2.15973	3.88272	3.33597	3.21386	67.9618	31.0707	24.3793
ENSRNOG00000001432	Dtx2	chr12:23687966-23727564	-	protein_coding	1.21135	2.31555	0.00607032	0.0251655	3.77813	2.56678	5.46978	4.75207	4.58882	17.5257	11.273	10.3572
ENSRNOG00000001436	Ywhag	chr12:23789638-23817883	+	protein_coding	0.635753	1.55375	0.00310003	0.0172141	5.61542	4.97966	32.097	32.4363	27.3842	50.6518	49.8195	43.8859
ENSRNOG00000001483	Wbscr16	chr12:25561777-25592342	+	protein_coding	0.797088	1.73759	0.00539848	0.0235616	3.28635	2.48926	4.90793	4.66467	4.28948	10.7847	8.10145	7.65839
ENSRNOG00000001488	Psmb1	chr1:57470632-57489727	-	protein_coding	0.743003	1.67366	0.00406158	0.0199149	7.77708	7.03408	131.974	122.262	136.345	230.669	242.468	186.109
ENSRNOG00000001500	Rab4b	chr1:83979298-83990588	-	protein_coding	0.894609	1.85911	0.023935	0.0599634	5.10557	4.21096	20.2517	21.2633	12.4243	38.4069	31.2537	31.1097
ENSRNOG00000001501	Snrpa	chr1:83999671-84008293	-	protein_coding	0.986101	1.98082	0.0267257	0.0645205	3.69253	2.70643	6.2327	5.27224	5.12946	16.8432	12.2265	8.15725
ENSRNOG00000001527	Cd80	chr11:64827635-64855353	-	protein_coding	0.929914	1.90516	0.00135325	0.0111063	1.44315	0.513232	0.321482	0.605681	0.37017	1.82529	1.44117	1.91495
ENSRNOG00000001555	Btg3	chr11:16873646-16889201	-	protein_coding	0.613789	1.53027	0.0158725	0.045291	4.70938	4.09559	16.4118	16.1705	15.7131	23.606	21.6623	31.1105
ENSRNOG00000001598	Usp16	chr11:27101227-27130341	+	protein_coding	0.748389	1.67992	0.000418435	0.00639951	5.19626	4.44787	19.6863	20.0497	22.8728	35.578	36.7714	34.6707
ENSRNOG00000001701	Cbr3	chr11:33909439-33917674	+	protein_coding	0.655208	1.57484	0.0362793	0.0802816	2.95199	2.29678	3.92659	5.24349	2.85681	7.34331	6.8094	6.11145
ENSRNOG00000001704	Runx1	chr11:32769165-33003021	-	protein_coding	0.945174	1.92542	0.00033449	0.00582535	3.02124	2.07606	3.38259	3.25977	3.01563	7.55196	7.53854	6.32821
ENSRNOG00000001748	LOC100912534	chr11:82856529-82860977	-	protein_coding	0.792956	1.73262	0.00706595	0.0274911	2.86964	2.07669	3.12383	3.2524	3.28058	8.03781	5.76921	5.38185
ENSRNOG00000001766	Tfrc	chr11:71397383-71419223	-	protein_coding	1.42377	2.68286	0.00603163	0.0250551	5.06245	3.63867	12.0603	10.2689	12.1284	41.3624	36.4216	22.5365
ENSRNOG00000001776	Muc20	chr11:71222600-71236223	+	protein_coding	2.26181	4.79592	0.0027707	0.0161192	3.02251	0.760697	0.4018	0.594879	1.17552	5.58188	11.111	5.73075
ENSRNOG00000001777	AABR07034428.1	chr11:71243334-71284939	-	protein_coding	0.865397	1.82184	0.0178492	0.0490152	0.942594	0.0771973	0.059578	0.046601	0.058771	0.622367	1.61692	0.672272
ENSRNOG00000001829	Ube2v2	chr11:89557273-89591175	+	protein_coding	2.10955	4.31556	1.37292e-06	0.00181512	4.65728	2.54773	4.79986	4.93851	4.8041	24.1654	25.6628	22.946
ENSRNOG00000001834	Mzt2b	chr11:89277039-89282929	+	protein_coding	0.855619	1.80953	0.0123269	0.0386941	2.74717	1.89155	2.06653	2.96122	3.20501	5.11221	5.0776	7.14731
ENSRNOG00000001843	Bcl6	chr11:80255790-80279075	+	protein_coding	2.97529	7.86413	0.00374101	0.01895	6.22791	3.25262	16.6582	5.35188	6.71903	87.7304	81.2139	56.7227
ENSRNOG00000001867	Snap29	chr11:87827651-87858107	-	protein_coding	1.47364	2.77722	0.0179518	0.0492034	4.21443	2.74078	5.78675	6.08857	5.20804	21.1655	24.9836	10.1078
ENSRNOG00000001869	Rab44	chr20:6397022-6410191	+	protein_coding	1.4634	2.75758	0.00357688	0.0185251	2.22717	0.763767	0.790473	0.876812	0.456673	3.88501	4.88562	2.57009
ENSRNOG00000001884	Ranbp1	chr11:86890585-86898818	+	protein_coding	1.11283	2.16269	0.0124996	0.0390174	5.76982	4.65699	23.1589	25.6928	23.9006	45.1506	44.3434	76.6196
ENSRNOG00000001928	Il1rap	chr11:77463954-77593207	-	protein_coding	0.785158	1.72328	0.0046784	0.0215993	3.49496	2.7098	5.64118	4.79311	6.27845	8.89136	10.6101	11.4788
ENSRNOG00000001943	Retnlg	chr11:54513102-54514441	-	protein_coding	1.46168	2.75429	0.0272445	0.0653099	3.33231	1.87063	2.65332	1.83881	3.71545	10.5074	13.5465	5.10444
ENSRNOG00000001959	Mx1	chr11:37891156-37914983	-	protein_coding	3.42391	10.7325	8.17799e-05	0.00362032	8.57654	5.15263	42.2536	35.0669	27.8507	329.792	443.88	377.088
ENSRNOG00000001963	Mx2	chr11:38035450-38059950	+	protein_coding	2.01713	4.04777	0.000174279	0.0044488	7.7943	5.77717	53.5253	47.383	61.5189	197.335	216.033	253.112
ENSRNOG00000001979	Rcan1	chr11:32539683-32550539	-	protein_coding	1.78614	3.44891	0.0146619	0.0429723	5.73857	3.95243	16.7921	13.815	13.0756	71.0323	70.0024	28.7606
ENSRNOG00000002012	Donson	chr11:31837839-31847490	-	protein_coding	1.14994	2.21904	0.00377063	0.0190205	2.68177	1.53183	1.66119	1.8581	2.17852	7.17746	4.69385	4.67352
ENSRNOG00000002032	Ifngr2	chr11:31694339-31712611	+	protein_coding	1.98575	3.96069	0.00639133	0.0259925	5.821	3.83525	17.6201	17.2403	7.56167	54.3134	62.6364	50.3275
ENSRNOG00000002055	Noa1	chr14:33108024-33124171	+	protein_coding	0.781103	1.71844	0.00228648	0.0145084	2.66035	1.87925	2.71096	2.77571	2.55339	4.49637	6.14118	5.43706
ENSRNOG00000002072	Eva1c	chr11:31002451-31075809	+	protein_coding	1.39082	2.62227	0.0333195	0.0754305	3.61669	2.22588	4.52372	3.7768	2.87971	20.6516	8.5139	7.96092
ENSRNOG00000002075	Cnot6l	chr14:15059387-15146586	+	protein_coding	0.797456	1.73803	0.00824683	0.0302279	4.09423	3.29678	7.5508	9.53138	9.5389	13.3142	18.192	17.1373
ENSRNOG00000002080	Urb1	chr11:30916730-30977483	-	protein_coding	0.8793	1.83948	0.016283	0.046026	3.26499	2.38569	4.70591	4.08126	3.92264	11.7206	7.97933	6.77734
ENSRNOG00000002116	LOC100911575	chr1:213991620-213993609	+	protein_coding	0.620468	1.53737	0.0118002	0.037733	7.31489	6.69442	105.259	103.493	99.0485	192.051	144.129	143.071
ENSRNOG00000002134	LOC103690086	chr14:5928737-5945321	+	protein_coding	3.50237	11.3323	0.000108404	0.00383597	5.37064	1.86827	2.6811	1.86574	3.61318	38.0026	36.4176	47.529
ENSRNOG00000002141	Cd200	chr11:60371729-60398448	+	protein_coding	0.61827	1.53503	0.00304746	0.0170196	4.89521	4.27694	19.352	16.8543	19.0497	32.0417	27.0115	27.4717
ENSRNOG00000002159	Gpat3	chr14:10343282-10395047	-	protein_coding	1.58695	3.00414	0.000442988	0.00659431	3.73337	2.14642	3.72773	3.97272	2.69116	12.8748	13.0078	11.1052
ENSRNOG00000002161	Tlr6	chr14:45024351-45046446	+	protein_coding	0.740009	1.67019	0.000849265	0.00879065	1.99407	1.25406	1.50643	1.25164	1.40423	2.71036	3.36281	2.90519
ENSRNOG00000002186	Nudt9	chr14:7036820-7054548	-	protein_coding	1.23445	2.35291	0.00858195	0.0309619	5.31926	4.08481	16.7589	14.9795	16.2176	49.8887	43.0094	27.4184
ENSRNOG00000002232	Aff1	chr14:7226586-7384876	-	protein_coding	0.660702	1.58085	0.0459133	0.0957163	4.25741	3.59671	10.7477	10.6849	11.8994	16.312	25.0089	14.5365
ENSRNOG00000002256	Art3	chr14:17143040-17225389	-	protein_coding	1.71756	3.2888	0.000943742	0.00924232	3.02521	1.30765	1.74528	1.45121	1.25403	5.71201	9.24991	6.84275
ENSRNOG00000002267	Chic2	chr14:35683442-35717922	+	protein_coding	0.617611	1.53433	0.014665	0.0429726	3.98686	3.36925	9.70152	9.06973	9.23944	11.9672	15.9468	17.1369
ENSRNOG00000002309	Hlx	chr13:102637769-102643223	-	protein_coding	0.688637	1.61176	0.0468633	0.096929	4.89694	4.2083	18.2022	13.0971	22.3344	31.3998	31.2779	24.2889
ENSRNOG00000002341	Trim25	chr10:76343847-76362145	+	protein_coding	0.755077	1.68772	0.0156582	0.0448946	4.67419	3.91912	14.9072	13.8978	13.6083	27.4615	28.5063	18.8173
ENSRNOG00000002389	Morf4l2	chrX:107394486-107405564	-	protein_coding	0.611907	1.52828	0.000270629	0.00527581	7.37475	6.76284	110.584	110.546	101.895	158.943	164.32	171.889
ENSRNOG00000002420	Zc3h7a	chr10:4536180-4575646	+	protein_coding	0.979358	1.97159	0.00232026	0.0146203	6.05857	5.07921	34.7108	32.2655	31.5232	79.2271	61.6308	57.9286
ENSRNOG00000002436	Mmd	chr10:77755216-77783779	+	protein_coding	0.934233	1.91087	0.0104726	0.0349181	3.74131	2.80707	5.76634	6.4377	5.81158	9.33763	12.8759	15.6746
ENSRNOG00000002450	Rrp15	chr13:105155441-105179095	-	protein_coding	1.01297	2.01806	0.0141577	0.0420289	4.80336	3.7904	13.7655	12.9983	11.8158	34.7201	28.7589	19.4805
ENSRNOG00000002460	Serpinb2	chr13:27449934-27463010	+	protein_coding	1.48034	2.79014	0.00996931	0.0338905	1.55784	0.0775041	0.023232	0.065144	0.07798	0.888561	2.63169	2.72074
ENSRNOG00000002470	Ifi47	chr10:34277993-34285623	+	protein_coding	3.32756	10.0391	0.00206165	0.0137032	4.05951	0.731954	1.62063	0.057093	0.653871	21.6302	10.7423	16.4446
ENSRNOG00000002506	Cdkl2	chr14:17531398-17565950	+	protein_coding	0.664443	1.58496	0.0167005	0.0468962	2.7845	2.12006	3.89354	2.63257	3.62135	5.29565	5.53835	6.94599
ENSRNOG00000002525	Ptgs2	chr13:67351087-67359335	+	protein_coding	1.31803	2.49326	0.0206889	0.0543063	2.34406	1.02602	1.21501	1.28374	0.669437	2.80112	6.91325	3.35139
ENSRNOG00000002548	Tnn	chr13:77829382-77896697	-	protein_coding	1.45616	2.74378	0.00273596	0.0160332	1.58557	0.129404	0.0824072	0.013214	0.19336	1.74812	1.46704	2.98749
ENSRNOG00000002612	Ddx52	chr10:71253598-71277277	+	protein_coding	0.973698	1.96387	0.0020097	0.0135703	3.90956	2.93586	7.64153	6.17186	6.2298	13.8647	16.1086	12.3449
ENSRNOG00000002643	Ugdh	chr14:44479614-44502845	+	protein_coding	2.05056	4.14267	3.36726e-05	0.00285914	5.62554	3.57498	9.65979	12.4877	10.7719	48.8038	47.1107	49.219
ENSRNOG00000002659	Ciita	chr10:5213350-5260608	-	protein_coding	2.0037	4.01027	0.000401941	0.00629896	4.01313	2.00943	2.65938	3.17749	3.26943	16.0697	18.1516	11.8761
ENSRNOG00000002667	Lamc2	chr13:70566643-70626252	-	protein_coding	1.36692	2.5792	0.0168957	0.0472328	5.55846	4.19153	15.6682	21.5479	15.2307	56.6215	58.3287	29.6153
ENSRNOG00000002669	Cluh	chr10:61432819-61454444	+	protein_coding	1.06748	2.09577	0.0372932	0.0819392	4.50896	3.44148	8.64518	10.1151	10.9604	32.6369	22.325	14.0438
ENSRNOG00000002671	Nme2	chr10:81648216-81653717	-	protein_coding	0.681843	1.60419	0.000547654	0.00717267	6.9879	6.30606	81.7602	80.4417	72.4975	130.717	128.421	118.967
ENSRNOG00000002723	Sele	chr13:82355471-82365341	+	protein_coding	1.36106	2.56873	0.0114153	0.0368263	1.56291	0.201856	0.112002	0.127676	0.213401	0.986048	3.08128	2.18174
ENSRNOG00000002778	Aatf	chr10:71744659-71837851	-	protein_coding	0.976877	1.9682	0.000444994	0.00659902	3.5049	2.52803	4.68856	4.39079	5.2572	11.4531	9.74665	9.9318
ENSRNOG00000002792	Cxcl2	chr14:18731378-18733391	-	protein_coding	7.44544	174.302	0.00237684	0.0148348	8.16278	0.717339	0.723633	1.29323	0.124424	646.635	536.753	66.5793
ENSRNOG00000002794	Selp	chr13:82429063-82464628	+	protein_coding	5.75986	54.1864	4.8942e-06	0.00229601	6.61497	0.855107	0.808952	0.633696	1.00281	78.979	112.371	102.856
ENSRNOG00000002802	Cxcl1	chr14:18743685-18745457	-	protein_coding	6.9871	126.86	4.28187e-05	0.00311356	10.5263	3.53923	11.7172	14.9912	6.72623	1763.44	1589.26	1142.25
ENSRNOG00000002810	Gfpt2	chr10:35279236-35325508	+	protein_coding	2.75223	6.73759	0.000963561	0.00934205	4.11156	1.35933	1.50168	1.84048	1.37668	20.7962	19.976	10.2981
ENSRNOG00000002829	Ppbp	chr14:18851954-18853315	-	protein_coding	3.16015	8.93921	0.00145548	0.0115226	3.79816	0.638016	0.552765	0.523909	0.592654	12.1758	22.1797	7.81453
ENSRNOG00000002843	Cxcl6	chr14:18860264-18862407	-	protein_coding	7.07054	134.414	2.07021e-05	0.00255145	7.31635	0.245805	0.150132	0.34787	0.075445	230.219	114.967	149.995
ENSRNOG00000002874	Rbm25	chr6:107156263-107164033	+	protein_coding	0.819459	1.76474	0.00653582	0.0263079	5.97033	5.15087	37.359	33.4978	32.8873	75.7322	54.1321	57.2584
ENSRNOG00000002879	Psen2	chr13:98513570-98530724	-	protein_coding	1.21137	2.31557	0.00911189	0.0321351	4.33556	3.12419	7.72867	8.41984	7.06181	21.9508	23.9566	13.3686
ENSRNOG00000002882	Zcchc2	chr13:25966428-26013338	+	protein_coding	1.26116	2.39689	0.00011261	0.00386087	4.53772	3.27655	8.88994	8.40734	8.78053	24.0233	23.0548	19.8171
ENSRNOG00000002926	Uap1	chr13:88463532-88497901	-	protein_coding	1.14274	2.208	0.00071535	0.0081086	5.95639	4.81365	28.2382	27.6894	25.5149	70.4943	60.5154	53.438
ENSRNOG00000002934	Atp1b1	chr13:82737159-82758004	-	protein_coding	0.864	1.82008	0.00473039	0.0217565	6.12628	5.26228	32.8381	42.3798	37.5142	78.8505	68.8462	60.1173
ENSRNOG00000002949	Pgs1	chr10:106991935-107030260	+	protein_coding	1.1942	2.28818	0.000145477	0.00420363	5.32927	4.13507	17.428	17.7402	14.7068	38.0525	39.2826	40.3093
ENSRNOG00000002980	Tsr1	chr10:61746059-61757518	+	protein_coding	1.58734	3.00495	0.00516159	0.0228648	4.37537	2.78803	4.87689	7.69468	5.44824	27.2516	18.0581	15.6047
ENSRNOG00000003005	Rasgef1c	chr10:35392762-35459267	+	protein_coding	0.854006	1.80751	0.0472473	0.0975188	0.905496	0.0514901	0	0.113013	0	1.53744	1.04836	0.264567
ENSRNOG00000003028	Dnah17	chr10:107029466-107158997	-	protein_coding	0.875332	1.83443	0.00721835	0.0278157	0.992383	0.117051	0.0661649	0.105535	0.0822079	0.577376	1.34942	1.12478
ENSRNOG00000003059	Optc	chr13:50735599-50746354	-	protein_coding	1.00612	2.0085	0.00128261	0.0108814	2.14724	1.14112	1.25913	1.11397	1.24645	3.31236	2.89048	4.18129
ENSRNOG00000003114	B4galt4	chr11:64557977-64583994	-	protein_coding	0.995872	1.99429	0.000753812	0.00830954	4.35266	3.35679	9.43333	9.79207	8.54901	21.8185	17.2239	19.5078
ENSRNOG00000003116	Dph1	chr10:62019379-62032407	-	protein_coding	0.906464	1.87445	0.00494059	0.0223209	2.50766	1.6012	2.43841	1.92142	1.78017	5.24912	5.21617	3.73479
ENSRNOG00000003127	Spryd4	chr7:2621961-2623781	-	protein_coding	0.625436	1.54268	0.0247445	0.0612526	0.802984	0.177548	0.435577	0.007664	0	0.649534	0.846223	0.7439
ENSRNOG00000003170	Nlrp3	chr10:45893018-45918254	+	protein_coding	1.39452	2.629	0.0135509	0.0409304	3.04053	1.64601	2.41264	2.51244	1.55741	10.5224	7.53553	4.6637
ENSRNOG00000003217	Lgals3bp	chr10:107415326-107424710	-	protein_coding	2.5004	5.65841	0.00205869	0.0136961	8.07887	5.57847	34.3953	39.4598	75.1895	242.658	271.298	296.935
ENSRNOG00000003232	Slc9a3r1	chr10:103713045-103730145	+	protein_coding	0.935261	1.91224	0.00243753	0.0150783	4.538	3.60274	10.738	11.8817	10.8584	24.5675	24.2999	18.3826
ENSRNOG00000003278	Map3k14	chr10:91303428-91353601	-	protein_coding	0.66612	1.5868	0.0235476	0.0592683	2.59527	1.92915	3.75824	2.77883	2.0718	5.40145	4.86825	4.87459
ENSRNOG00000003281	Mcm9	chr20:34846804-34929965	-	protein_coding	0.654168	1.57371	0.0017075	0.0124472	1.9053	1.25113	1.20462	1.30197	1.65737	2.80382	2.85289	2.58635
ENSRNOG00000003336	Mybph	chr13:51034256-51041902	+	protein_coding	3.17232	9.01493	4.6896e-05	0.00312011	3.54678	0.374468	0.427196	0.230347	0.2407	13.2701	8.92268	10.2722
ENSRNOG00000003397	Adprm	chr10:53583276-53595827	-	protein_coding	0.902198	1.86891	0.00110447	0.0101212	4.44893	3.54673	11.313	11.191	9.63203	18.4752	21.9137	22.3458
ENSRNOG00000003424	Elac2	chr10:51478378-51501165	+	protein_coding	0.803379	1.74518	0.0159938	0.0455217	3.55006	2.74668	5.69092	5.93815	5.51289	14.2864	9.89398	8.65019
ENSRNOG00000003439	Il15	chr19:23542889-23554594	-	protein_coding	0.641407	1.55985	0.00174799	0.0125922	4.77509	4.13368	16.6727	15.1491	17.951	26.9683	24.4399	27.8504
ENSRNOG00000003486	Mnda	chr13:92073668-92089980	-	protein_coding	2.75751	6.7623	2.15008e-05	0.00255464	6.03879	3.28128	10.1742	7.90838	8.23156	62.5956	61.1948	70.8446
ENSRNOG00000003524	Lrrc59	chr10:82352390-82367047	+	protein_coding	0.999598	1.99944	0.0022793	0.0145015	4.00595	3.00635	7.14773	8.29584	5.84985	15.4803	16.1484	13.6738
ENSRNOG00000003538	Adamts4	chr13:89622632-89634419	+	protein_coding	4.41195	21.2877	4.52035e-05	0.00312011	4.53093	0.11898	0.044593	0.132496	0.082595	27.6579	24.4525	15.9379
ENSRNOG00000003546	Tnfrsf12a	chr10:12995904-12997930	-	protein_coding	1.97677	3.9361	0.00609004	0.0252113	5.0381	3.06133	9.74464	9.43211	4.18915	38.9353	30.2654	27.4078
ENSRNOG00000003551	B4galt3	chr13:89643881-89649906	+	protein_coding	0.655669	1.57535	0.00617284	0.025431	4.66672	4.01106	17.2764	14.6619	13.6423	26.5735	21.8383	25.0205
ENSRNOG00000003592	Med28	chr14:70089225-70098021	-	protein_coding	0.590189	1.50544	0.00353675	0.0183959	4.4467	3.85652	14.5329	13.683	12.3263	22.3075	18.8119	21.4571
ENSRNOG00000003594	Tmem183a	chr13:51184629-51201364	-	protein_coding	0.59852	1.51416	0.00636856	0.0259312	4.46812	3.8696	14.5411	12.4197	13.9753	22.1038	23.1315	18.4469
ENSRNOG00000003597	Tuba4a	chr9:82415605-82419288	-	protein_coding	1.20668	2.30806	0.00160811	0.0120987	4.06076	2.85408	6.9228	6.29651	5.53881	16.0031	18.4734	13.0366
ENSRNOG00000003600	Pnpt1	chr14:113530470-113561645	+	protein_coding	1.10251	2.14728	0.00194049	0.013274	4.56808	3.46557	9.5614	9.08653	11.6549	23.2388	25.9124	19.461
ENSRNOG00000003613	Mid1	chrX:25458771-25628272	-	protein_coding	1.14584	2.21276	2.87515e-05	0.0027263	2.67399	1.52814	1.95424	1.68741	2.02184	5.30446	5.33317	5.51
ENSRNOG00000003645	Hnrnpab	chr10:34955716-34961608	-	protein_coding	0.620534	1.53744	0.0228839	0.0580499	6.46518	5.84464	54.0374	54.9632	60.6138	98.3803	97.736	69.2847
ENSRNOG00000003683	Glp2r	chr10:54260290-54323439	-	protein_coding	0.601236	1.51702	0.000880574	0.00893817	0.844586	0.24335	0.252998	0.103036	0.200127	0.845683	0.848243	0.697544
ENSRNOG00000003716	Batf3	chr13:109713489-109724863	+	protein_coding	1.38761	2.61646	0.00621216	0.0255135	2.3748	0.987186	1.18704	1.47827	0.437182	3.93826	5.04769	3.67192
ENSRNOG00000003809	Sat1	chrX:43625169-43629765	+	protein_coding	1.5707	2.97049	0.0032058	0.0175199	8.29612	6.72541	146.121	91.5507	86.0162	331.955	285.411	324.66
ENSRNOG00000003917	Uck2	chr13:85376716-85443976	-	protein_coding	0.735377	1.66483	0.0274553	0.0656694	3.24256	2.50718	4.62408	4.4452	4.99989	6.11906	10.6649	9.20982
ENSRNOG00000003954	Il2rg	chrX:71162585-71169865	-	protein_coding	1.05863	2.08296	0.0164314	0.0463732	4.94449	3.88586	16.5696	14.6426	10.7546	22.4366	32.2885	36.4226
ENSRNOG00000003959	Rgs18	chr13:61565483-61591139	-	protein_coding	0.701335	1.62601	0.0153923	0.0443356	2.84565	2.14431	3.80619	3.13774	3.34453	5.4112	7.98256	5.44966
ENSRNOG00000003967	Vmp1	chr10:73902837-74001895	-	protein_coding	2.22706	4.6818	0.000120412	0.00389714	6.49743	4.27037	17.1319	20.685	17.2779	84.251	79.8125	106.05
ENSRNOG00000003969	Fam20a	chr10:97962693-98018014	-	protein_coding	0.968992	1.95747	0.00409667	0.0200127	3.17093	2.20193	4.52637	3.42661	2.98137	9.1181	7.30011	7.69857
ENSRNOG00000003975	Pfn1	chr10:57273005-57275708	-	protein_coding	0.672229	1.59353	0.000231334	0.00492811	7.44001	6.76778	114.342	108.324	101.614	176.143	174.421	167.495
ENSRNOG00000003977	Dusp1	chr10:16970626-16973418	+	protein_coding	1.92507	3.79755	0.0265819	0.0642694	7.03782	5.11276	42.522	23.1068	38.4847	125.573	241.554	72.8991
ENSRNOG00000004006	Dnajb9	chr6:64165914-64170122	-	protein_coding	1.28731	2.44072	0.0128787	0.0397065	3.73842	2.45111	5.47672	4.63281	3.48221	8.87641	12.1233	17.3436
ENSRNOG00000004018	Tdrd5	chr13:73872621-73921969	-	protein_coding	2.25542	4.77474	0.0054231	0.0236062	2.32967	0.0742487	0.0237618	0.0486774	0.0869573	6.27347	5.08762	1.86888
ENSRNOG00000004019	Phlda1	chr7:54247460-54249664	+	protein_coding	2.47659	5.56579	0.0125513	0.0391269	6.43596	3.95937	11.7421	9.47917	27.1902	50.6774	106.635	115.679
ENSRNOG00000004048	Lrrk2	chr7:132857628-133018584	+	protein_coding	0.598898	1.51456	0.00347032	0.0182564	5.42182	4.82292	26.2671	30.4634	25.4293	40.2933	40.0608	45.4603
ENSRNOG00000004062	C4bpa	chr13:47342079-47377703	-	protein_coding	2.25995	4.78976	0.00806921	0.0298678	5.81367	3.55372	6.74135	20.4795	8.7384	59.7227	46.68	60.4586
ENSRNOG00000004063	Sh3pxd2b	chr10:17209212-17291876	+	protein_coding	0.903993	1.87124	0.0125763	0.0391498	2.57469	1.6707	1.91439	2.58972	2.08447	4.16889	6.74757	4.27974
ENSRNOG00000004100	Trib1	chr7:99954492-99961026	+	protein_coding	2.8748	7.33503	1.95858e-05	0.00253197	4.30037	1.42557	1.64726	1.51699	1.90896	21.5375	16.4884	18.4074
ENSRNOG00000004111	Soat1	chr13:74035080-74077783	-	protein_coding	0.947283	1.92824	0.0109826	0.0358939	6.10773	5.16045	30.8492	39.087	34.8299	58.8443	60.2185	88.5207
ENSRNOG00000004125	C4bpb	chr13:47387173-47397890	-	protein_coding	1.52863	2.88512	0.000388836	0.00620105	2.0332	0.504564	0.586028	0.296946	0.388141	3.11853	3.65499	2.57684
ENSRNOG00000004132	Lasp1	chr10:85744568-85785133	+	protein_coding	0.683389	1.60591	0.00283402	0.0163146	7.18136	6.49797	87.8169	90.9919	89.3663	151.871	157.815	124.949
ENSRNOG00000004140	Pacrgl	chr14:66749809-66771750	-	protein_coding	0.68544	1.60819	0.00690504	0.0271846	2.33641	1.65097	2.28352	2.02396	2.11929	5.0317	3.72577	3.51932
ENSRNOG00000004196	Rps29	chr6:91455333-91456696	-	protein_coding	1.65342	3.14579	0.00119237	0.0104904	10.1572	8.50379	355.578	365.203	365.28	1489.23	1070.87	931.15
ENSRNOG00000004205	Pkdcc	chr6:6427657-6436974	+	protein_coding	0.822306	1.76823	0.0191283	0.0515383	3.4836	2.66129	6.13215	5.02822	4.88813	12.9695	10.5128	7.70243
ENSRNOG00000004210	Osr1	chr6:35314444-35321667	+	protein_coding	1.26567	2.40438	0.0164583	0.0464403	3.26242	1.99675	2.79489	4.2775	2.1741	7.11876	7.18971	12.2892
ENSRNOG00000004226	Irak3	chr7:64923615-64982281	-	protein_coding	2.38329	5.21724	0.000588015	0.00739344	4.33157	1.94828	2.03315	2.96728	3.77625	22.4444	20.0301	15.5545
ENSRNOG00000004247	Nhp2	chr10:34975708-34979082	+	protein_coding	1.36922	2.58332	4.09917e-05	0.00305714	4.88728	3.51806	11.055	10.0202	10.3178	28.6332	30.7429	26.5569
ENSRNOG00000004307	Tor3a	chr13:74252405-74276964	-	protein_coding	2.24147	4.72878	0.00461431	0.0215017	4.0181	1.77663	2.29729	2.72423	2.27538	22.8451	17.4344	8.67553
ENSRNOG00000004359	Wars	chr6:132771021-132802210	-	protein_coding	3.09775	8.56083	7.75574e-05	0.00352887	7.63095	4.5332	22.9765	21.2251	22.2948	152.659	227.601	220.719
ENSRNOG00000004361	Parp10	chr7:117291877-117300662	-	protein_coding	1.40298	2.64448	1.03891e-05	0.00251647	5.32724	3.92426	14.5454	14.4606	13.5591	41.3927	37.5127	38.6356
ENSRNOG00000004373	Ddx39a	chr19:24846938-24854953	+	protein_coding	1.19852	2.29504	0.000264465	0.00523267	4.95964	3.76113	12.9239	11.8127	12.9713	34.2481	28.2301	28.2442
ENSRNOG00000004393	Fcamr	chr13:47539231-47552848	+	protein_coding	2.16488	4.4843	0.0132042	0.0402913	2.28216	0.117279	0.161551	0.076933	0.020202	5.07158	1.44339	6.75715
ENSRNOG00000004405	Pigr	chr13:47572219-47591699	+	protein_coding	0.869832	1.82745	0.0235786	0.0593053	7.85251	6.98268	99.4714	173.371	114.47	215.072	233.113	243.06
ENSRNOG00000004412	Mtbp	chr7:95309928-95387680	+	protein_coding	1.00633	2.0088	0.00164259	0.0122003	2.28142	1.27508	1.30524	1.33348	1.63509	3.99405	4.51635	3.17082
ENSRNOG00000004452	Aqp12a	chr9:100156154-100166218	+	protein_coding	0.60398	1.5199	0.00632776	0.0258351	0.706778	0.102798	0.114736	0.031995	0.07643	0.702757	0.815511	0.406476
ENSRNOG00000004470	Il24	chr13:47618452-47623849	-	protein_coding	0.862377	1.81803	0.0489797	0.100072	0.893687	0.0313098	0	0	0.067273	1.84238	0.513319	0.490962
ENSRNOG00000004500	Myc	chr7:102586313-102591240	+	protein_coding	2.12277	4.35529	0.000132787	0.00404848	5.50622	3.38345	10.0142	8.89454	9.42832	53.4053	38.0236	43.2228
ENSRNOG00000004563	Sec24a	chr10:37139806-37215899	-	protein_coding	0.700094	1.62461	0.0020612	0.0137032	3.22551	2.52542	4.34984	4.73873	5.21613	8.68322	9.01947	7.43453
ENSRNOG00000004575	Il1a	chr3:121825412-121836086	-	protein_coding	3.0234	8.13079	0.00184332	0.012998	5.60792	2.58452	4.83585	3.44636	7.31663	55.8681	63.6726	30.5402
ENSRNOG00000004591	Alg12	chr7:129798663-129812388	-	protein_coding	0.769315	1.70446	0.00795324	0.02961	3.3975	2.62818	5.4677	4.67079	5.44306	11.0902	10.144	7.68511
ENSRNOG00000004624	Rnd3	chr3:36642587-36660758	-	protein_coding	0.906054	1.87391	0.0373224	0.0819909	4.80078	3.89472	15.1616	12.3046	14.3038	21.4763	40.2445	22.3584
ENSRNOG00000004637	Fbxo7	chr7:23815245-23843634	-	protein_coding	0.838429	1.7881	0.00215792	0.0140544	4.31298	3.47455	10.0654	9.33971	11.0048	21.5594	18.6874	16.6803
ENSRNOG00000004647	Il10	chr13:47739526-47743392	+	protein_coding	1.00779	2.01082	0.0304126	0.0706196	1.11933	0.111549	0.146816	0	0.099625	0.701251	2.29189	0.830817
ENSRNOG00000004649	Il1b	chr3:121876263-121882726	-	protein_coding	4.53969	23.2586	1.8801e-06	0.00195302	6.72987	2.19017	3.86847	3.79898	3.068	96.1535	113.172	106.81
ENSRNOG00000004673	Rbm43	chr3:37434620-37445907	-	protein_coding	1.1844	2.2727	0.000158053	0.00424874	4.54652	3.36212	9.06729	9.00985	9.78836	23.7123	23.6295	19.9677
ENSRNOG00000004681	Eny2	chr7:83348694-83357492	+	protein_coding	0.622121	1.53914	0.00454601	0.0213195	3.90215	3.28003	8.10853	8.77344	9.29599	14.4786	15.4104	12.1566
ENSRNOG00000004712	Angptl1	chr13:74410010-74474681	+	protein_coding	1.76504	3.39882	0.000377009	0.00611281	2.4661	0.701065	0.480506	0.945823	0.491459	3.97172	5.2029	4.47028
ENSRNOG00000004723	Fcf1	chr6:108796182-108808048	+	protein_coding	0.688181	1.61125	0.00824673	0.0302279	5.98462	5.29644	42.3279	38.0185	34.9026	72.8173	60.5417	54.8889
ENSRNOG00000004777	Esf1	chr3:133178561-133232322	-	protein_coding	0.72345	1.65113	0.00196071	0.0133433	5.13428	4.41083	20.1726	20.1323	20.5108	39.0157	33.2667	30.5948
ENSRNOG00000004854	Has2	chr7:96438046-96464049	-	protein_coding	0.752828	1.68509	0.0145081	0.0426761	0.817171	0.0643433	0.040238	0.07738	0.020014	0.855612	1.12332	0.388275
ENSRNOG00000004904	Pa2g4	chr7:2979588-2987055	-	protein_coding	0.754525	1.68708	0.000423297	0.00642589	5.91983	5.16531	34.0914	34.8243	35.7585	61.7551	63.0755	54.1821
ENSRNOG00000004964	Erbb3	chr7:2989340-3010350	-	protein_coding	0.990843	1.98735	0.00025955	0.00520534	5.12538	4.13454	15.0393	18.0389	16.7433	35.6007	32.4101	33.7788
ENSRNOG00000004972	Upp1	chr14:89314176-89334276	+	protein_coding	2.30222	4.93214	0.0006606	0.00781701	7.15889	4.85667	28.9325	28.2698	26.7617	103.702	182.565	150.834
ENSRNOG00000004996	Zcrb1	chr7:134588903-134602239	-	protein_coding	0.802679	1.74434	0.0484816	0.0992914	5.42339	4.62071	25.1251	25.8411	20.2353	60.6091	32.7886	36.9659
ENSRNOG00000005012	Utp14a	chrX:135092040-135117455	+	protein_coding	0.864311	1.82047	0.00455273	0.0213375	4.26994	3.40563	9.99648	8.91839	9.9118	22.3079	17.4543	15.6932
ENSRNOG00000005031	Surf6	chr3:5441409-5452156	-	protein_coding	0.620392	1.53729	0.012347	0.038724	3.20828	2.58789	5.86185	4.59987	4.6556	9.65533	7.92144	7.3055
ENSRNOG00000005067	Zfp36l2	chr6:7417425-7421456	-	protein_coding	0.750997	1.68296	0.0319113	0.0731073	3.04013	2.28913	3.06893	5.10646	3.69921	9.22322	6.35856	6.39829
ENSRNOG00000005087	Cebpz	chr6:1516804-1534488	-	protein_coding	0.830752	1.77861	0.00596498	0.024892	5.14115	4.3104	18.3162	18.1548	20.1096	41.3866	33.9941	28.6278
ENSRNOG00000005096	Bzw2	chr6:55586346-55647665	-	protein_coding	0.968659	1.95702	0.049326	0.100539	4.75078	3.78212	11.673	14.5708	12.1949	29.8629	35.9389	16.1184
ENSRNOG00000005203	Sec61g	chr14:99774589-99780964	-	protein_coding	0.920693	1.89302	0.00157075	0.0119562	7.33968	6.41899	97.9389	83.4866	73.9491	161.073	167.31	154.801
ENSRNOG00000005214	Plek	chr14:100151210-100217913	-	protein_coding	2.29988	4.92418	0.000889944	0.00898782	6.36851	4.06863	19.4399	12.2413	16.4553	83.1622	100.972	64.7266
ENSRNOG00000005243	Pop1	chr7:73270455-73298239	+	protein_coding	0.837614	1.78709	0.00188633	0.0131076	1.90813	1.07052	0.8116	1.22486	1.29832	2.60418	2.70133	2.96325
ENSRNOG00000005256	Zc3h15	chr3:71020534-71040157	+	protein_coding	1.05993	2.08483	0.00266273	0.015795	5.66838	4.60845	24.8349	22.2974	23.1175	59.6384	50.6507	40.9988
ENSRNOG00000005261	Fbxl5	chr14:71852682-71891143	+	protein_coding	1.21926	2.32828	5.97949e-05	0.00331589	6.125	4.90574	28.1918	29.6368	29.1173	62.74	72.6187	71.448
ENSRNOG00000005298	Zfp513	chr6:26537707-26541048	+	protein_coding	0.935022	1.91192	0.000469282	0.0066844	4.9367	4.00168	16.5251	14.0153	14.6199	32.1329	29.0333	27.8682
ENSRNOG00000005344	Nol10	chr6:42656616-42745098	+	protein_coding	0.911902	1.88152	0.00842396	0.0306121	3.95624	3.04434	6.77284	7.29537	7.70761	11.9976	18.8286	13.5108
ENSRNOG00000005350	Pwp1	chr7:23988776-24004774	-	protein_coding	0.798716	1.73955	0.0457817	0.0955378	3.65994	2.86123	6.58127	5.70401	6.54865	14.6989	13.835	7.67168
ENSRNOG00000005374	Lyar	chr14:77308204-77321977	-	protein_coding	0.742554	1.67314	0.0109907	0.0358962	4.19873	3.45618	11.285	9.15368	9.59844	20.7224	14.4016	17.508
ENSRNOG00000005392	Ngfr	chr10:83389847-83408061	-	protein_coding	0.734316	1.66361	0.019376	0.0519515	1.14307	0.408756	0.309447	0.326209	0.347236	1.44249	0.692771	1.60534
ENSRNOG00000005406	Clint1	chr10:30833914-31007820	+	protein_coding	1.1786	2.26358	0.000212714	0.00474226	6.28596	5.10736	32.4414	34.7512	33.2632	79.1372	84.3005	68.5028
ENSRNOG00000005413	Creb3l1	chr3:80892435-80933283	-	protein_coding	1.98174	3.94969	0.000175734	0.00446022	4.0688	2.08706	3.33778	2.6614	3.82936	14.765	18.0151	14.7651
ENSRNOG00000005424	Odc1	chr6:42852683-42859927	+	protein_coding	2.12531	4.36296	0.000637453	0.00771897	7.11735	4.99204	30.2175	32.2629	30.0385	177.633	140.205	105.119
ENSRNOG00000005491	Best3	chr7:60015998-60057152	+	protein_coding	0.936959	1.91449	0.00222234	0.01429	1.84869	0.911731	0.696316	0.740681	1.25501	2.52461	2.75004	2.53498
ENSRNOG00000005524	Pno1	chr14:100364190-100372760	-	protein_coding	1.5272	2.88227	0.0208188	0.054536	4.20129	2.67409	6.56503	3.90555	6.00554	14.2373	12.4582	29.3563
ENSRNOG00000005528	Tbk1	chr7:63655247-63687978	-	protein_coding	0.604271	1.52021	0.045534	0.0951712	5.40798	4.80371	29.3815	21.7922	30.4622	48.3243	43.6721	33.7374
ENSRNOG00000005535	Ikzf4	chr7:3061469-3074359	-	protein_coding	0.612201	1.52859	0.034198	0.0768214	1.56653	0.954326	1.25624	0.637416	0.969236	2.02735	2.46198	1.4793
ENSRNOG00000005556	Snrpf	chr7:34478331-34485034	-	protein_coding	0.828932	1.77637	0.00870471	0.0312497	5.9163	5.08737	31.6733	35.9125	31.5826	71.0711	61.3915	47.9853
ENSRNOG00000005576	Rpia	chr4:98568028-98593664	-	protein_coding	0.976258	1.96736	5.25369e-05	0.00318352	5.24786	4.2716	19.4192	18.3226	17.2616	36.8227	38.2921	35.9175
ENSRNOG00000005670	Art4	chr4:170830851-170841187	-	protein_coding	1.38968	2.62021	0.0147926	0.0432243	2.59305	1.20337	1.31716	1.73742	0.925113	3.93631	8.2088	3.83232
ENSRNOG00000005687	Slc6a14	chrX:120624518-120649111	+	protein_coding	2.30494	4.94146	0.00678139	0.0268358	7.09499	4.79006	22.7897	29.0103	28.6615	97.0235	248.51	103.472
ENSRNOG00000005695	Mgp	chr4:170856751-170860225	-	protein_coding	1.96664	3.90858	0.000116571	0.00389319	12.1562	10.1895	1269.9	1268.18	986.239	4868.92	4530.62	4307.6
ENSRNOG00000005720	Spic	chr7:29225727-29233392	-	protein_coding	0.716277	1.64294	0.0177796	0.0488974	3.09406	2.37778	4.54381	4.38351	3.70407	7.512	9.48065	5.97896
ENSRNOG00000005731	Birc3	chr8:6048969-6076598	-	protein_coding	5.1183	34.7347	1.01953e-05	0.00251305	6.94994	1.83163	2.94497	2.40605	2.35609	138.12	137.99	96.7339
ENSRNOG00000005810	Nlrc4	chr6:22167919-22194250	+	protein_coding	1.2052	2.3057	0.00470812	0.0216884	2.70631	1.50111	2.1746	1.78893	1.56159	4.30014	5.27679	7.35639
ENSRNOG00000005818	RGD1563349	chr4:21584369-21668570	-	protein_coding	0.994607	1.99254	0.000388871	0.00620105	3.15108	2.15648	3.6017	3.52458	3.25594	6.91258	8.33712	8.48812
ENSRNOG00000005823	Utp20	chr7:29296963-29378080	-	protein_coding	0.604955	1.52093	0.00356835	0.0184875	2.97423	2.36927	3.73687	4.25422	4.54202	7.63891	6.27384	6.72279
ENSRNOG00000005868	Ttc21b	chr3:52286794-52361060	-	protein_coding	0.900661	1.86692	0.000922378	0.00916657	3.69922	2.79856	5.77438	6.07162	6.03006	11.0358	13.9291	11.1961
ENSRNOG00000005871	Il1rn	chr3:1452644-1468614	+	protein_coding	3.3391	10.1197	0.000600019	0.00745469	6.92249	3.58339	13.0788	14.1875	7.05515	150.464	118.555	97.5719
ENSRNOG00000005900	Slc2a6	chr3:5568321-5575136	-	protein_coding	2.32862	5.02326	6.69346e-05	0.00339194	4.20989	1.88126	3.12582	2.32561	2.64393	15.8099	16.7793	20.2045
ENSRNOG00000005903	St14	chr8:32240133-32280869	-	protein_coding	1.38448	2.61078	0.00982197	0.0336031	4.97153	3.58705	11.153	12.0131	9.97402	38.9741	35.7271	20.0367
ENSRNOG00000005905	Pde4b	chr5:121952977-122136814	+	protein_coding	2.42102	5.3555	0.000114216	0.00386291	5.58816	3.16713	7.25899	8.24721	8.49008	38.3189	50.2363	54.2621
ENSRNOG00000005944	Slurp1	chr7:115961731-115963046	-	protein_coding	1.08997	2.1287	0.0357837	0.0794264	1.29107	0.201101	0.337489	0.135854	0	2.15306	1.99148	0.553592
ENSRNOG00000005958	Rrbp1	chr3:138055240-138116664	-	protein_coding	1.16868	2.24806	0.000214015	0.00475179	7.19449	6.02581	65.3401	64.5802	62.5769	155.469	154.186	128.417
ENSRNOG00000005964	Nr4a3	chr5:63781801-63821637	+	protein_coding	1.15773	2.23107	0.0240097	0.0600986	1.5008	0.343064	0.3423	0.254015	0.212453	1.36124	3.42382	1.16979
ENSRNOG00000005965	Irak4	chr7:135803698-135832652	+	protein_coding	0.715689	1.64227	0.0237097	0.0595013	3.24053	2.52484	3.3914	5.22391	5.9741	8.51529	8.59	8.25221
ENSRNOG00000005981	Nt5c3a	chr4:87237949-87281157	-	protein_coding	1.95269	3.87096	0.0110531	0.0360012	4.7216	2.76891	7.99095	4.5086	5.39334	40.4075	25.8691	15.5081
ENSRNOG00000005984	Etv6	chr4:167754525-167992168	+	protein_coding	1.08662	2.12376	0.001512	0.0117876	3.32752	2.2409	3.2148	4.26532	3.75918	10.4718	8.89651	7.91115
ENSRNOG00000006004	Phc2	chr5:146882756-146931444	+	protein_coding	0.997645	1.99674	0.000821995	0.00863235	5.86825	4.87061	27.1263	27.1368	30.6382	62.9042	59.6569	50.4222
ENSRNOG00000006010	RGD1566368	chr8:132665927-132753292	-	protein_coding	3.6317	12.3952	0.0022075	0.0142493	5.92269	2.29098	3.47928	5.59658	2.96676	85.2607	80.8219	30.6255
ENSRNOG00000006076	Steap2	chr4:25507463-25527087	+	protein_coding	1.33024	2.51445	0.0333977	0.0755253	3.99939	2.66915	8.66235	3.59877	4.79106	9.96749	18.7062	17.9277
ENSRNOG00000006094	Cd44	chr3:92696313-92783658	-	protein_coding	0.649368	1.56848	0.00869464	0.031229	5.54956	4.9002	29.1788	30.8403	26.7102	51.692	48.074	38.7338
ENSRNOG00000006114	Cfap69	chr4:25538497-25609652	+	protein_coding	0.815449	1.75985	0.0440451	0.0928896	3.3489	2.53345	5.07961	4.57626	4.72422	8.62664	13.5923	6.52938
ENSRNOG00000006116	Hk2	chr4:113559427-113610243	-	protein_coding	3.50279	11.3356	0.00226175	0.0144393	5.46066	1.95786	3.85687	2.25238	2.71165	54.22	66.1854	22.0193
ENSRNOG00000006146	Trim54	chr6:26603369-26624092	-	protein_coding	1.71719	3.28795	0.0137416	0.0412554	3.43323	1.71604	2.46632	1.98935	2.42213	13.7382	12.8354	5.18134
ENSRNOG00000006151	Reg3b	chr4:109467272-109470510	+	protein_coding	2.90108	7.46985	0.00222591	0.014292	2.90108	0	0	0	0	12.2576	4.32043	4.90914
ENSRNOG00000006204	Slc30a3	chr6:26642783-26650105	+	protein_coding	1.93719	3.8296	0.00610827	0.0252635	4.06447	2.12727	3.87093	2.38274	4.06105	24.5718	11.3408	13.8415
ENSRNOG00000006227	Ifih1	chr3:48557696-48604097	-	protein_coding	2.05568	4.15741	0.00161089	0.0121071	5.36715	3.31147	8.33954	9.14817	9.32379	51.9124	45.2235	27.7476
ENSRNOG00000006237	Gpr37l1	chr13:51985684-51992693	-	protein_coding	1.39074	2.62214	0.00420945	0.020322	1.96307	0.572324	0.299771	0.688773	0.49769	3.16881	3.82107	1.94897
ENSRNOG00000006238	Traf2	chr3:2746075-2770620	-	protein_coding	1.14503	2.21151	0.00159595	0.0120709	4.3792	3.23417	8.36336	7.96933	8.92089	16.2054	20.6879	23.1504
ENSRNOG00000006314	Zbp1	chr3:171276062-171286537	-	protein_coding	2.06512	4.18468	5.97879e-05	0.00331589	3.15736	1.09224	1.26711	0.934117	1.21022	8.41382	8.60728	6.85255
ENSRNOG00000006320	Ptges	chr3:9727408-9738752	-	protein_coding	2.937	7.65817	0.00677827	0.0268358	3.42404	0.487044	0.332605	0.500618	0.376806	5.28925	22.1656	7.48745
ENSRNOG00000006330	Elf3	chr13:52083859-52088780	-	protein_coding	3.63264	12.4032	0.00033003	0.00576878	7.15953	3.52689	11.371	8.67915	11.7896	184.203	163.03	95.1886
ENSRNOG00000006360	Reg3a	chr4:109477920-109480659	+	protein_coding	1.79446	3.46885	0.000813778	0.00861651	1.79446	0	0	0	0	3.32845	1.70093	2.57034
ENSRNOG00000006364	Dld	chr6:50597677-50618694	-	protein_coding	1.14952	2.2184	0.00501298	0.0225634	6.17762	5.0281	24.1384	36.5721	35.7813	77.0123	74.112	63.7257
ENSRNOG00000006380	Srsf6	chr3:159305345-159310668	+	protein_coding	0.79815	1.73887	0.0246138	0.0610701	6.17528	5.37713	45.8082	31.8788	45.6436	57.5858	80.4089	78.1347
ENSRNOG00000006384	Ddx58	chr5:56500734-56536772	-	protein_coding	1.45569	2.74287	0.000787866	0.0084748	6.0154	4.55971	20.4253	26.2935	21.4307	54.844	72.953	64.5414
ENSRNOG00000006418	Samhd1	chr3:153210829-153250641	-	protein_coding	2.71423	6.56241	0.000696555	0.00800877	5.93354	3.21932	10.6437	7.54438	7.12006	78.4246	62.5932	44.2019
ENSRNOG00000006435	Tor1b	chr3:9792899-9798923	+	protein_coding	1.61775	3.06895	0.00703698	0.0274735	4.37613	2.75838	5.6118	6.30645	5.41272	27.5641	21.8363	12.7275
ENSRNOG00000006532	H3f3b	chr10:104573664-104575890	-	protein_coding	3.30232	9.86504	0.000876005	0.00890766	9.91409	6.61177	75.9572	80.3898	148.349	1142.69	1083.95	722.771
ENSRNOG00000006569	Itgb8	chr6:147094097-147172813	-	protein_coding	2.21893	4.65549	6.21212e-05	0.00335624	2.93555	0.716612	0.596112	0.839674	0.511336	7.49068	6.77393	5.78389
ENSRNOG00000006579	Reg3g	chr4:109529679-109532234	-	protein_coding	2.29335	4.90192	0.000621007	0.00758296	2.29335	0	0	0	0	5.20667	4.29464	2.58429
ENSRNOG00000006623	Cd302	chr3:46327383-46361092	-	protein_coding	2.42524	5.37117	0.0111179	0.0361314	6.98838	4.56315	22.0314	23.1793	22.7229	267.242	92.8428	80.3226
ENSRNOG00000006628	Dusp16	chr4:168472412-168517177	-	protein_coding	1.05756	2.08141	0.0368379	0.0811471	2.97235	1.9148	3.12162	2.35367	2.87833	10.1618	7.49826	4.09611
ENSRNOG00000006681	Rdh10	chr5:2603505-2632030	-	protein_coding	0.812941	1.75679	0.0125616	0.0391269	3.15136	2.33842	5.07487	3.84253	3.3974	7.31767	9.59762	6.95707
ENSRNOG00000006689	Chd7	chr5:21830882-21950696	+	protein_coding	0.667663	1.5885	0.0143003	0.0422272	3.22126	2.5536	5.22394	4.51406	4.89648	10.2535	6.79842	8.24262
ENSRNOG00000006715	Ccr1	chr8:132996649-133002201	-	protein_coding	2.2563	4.77764	0.00549045	0.02375	2.71094	0.454644	0.363411	0.657459	0.138977	3.06033	5.80376	9.16047
ENSRNOG00000006767	Cst7	chr3:146365092-146373365	+	protein_coding	1.99815	3.99488	0.000267243	0.00524496	4.66031	2.66216	6.77809	4.86699	4.55757	26.0555	24.8867	22.0861
ENSRNOG00000006789	Ddit3	chr7:70580198-70585084	+	protein_coding	1.78648	3.44973	0.044307	0.093358	5.55954	3.77306	11.2707	21.8123	8.12791	26.6761	42.729	85.6739
ENSRNOG00000006828	Baz1a	chr6:75793960-75874235	-	protein_coding	0.935016	1.91191	0.00125915	0.0107883	4.53395	3.59893	10.9711	10.8738	11.5152	25.8572	21.4953	19.5784
ENSRNOG00000006855	Padi4	chr5:159260675-159293673	-	protein_coding	1.48457	2.79833	0.0237476	0.0595758	2.70353	1.21896	1.80289	1.8519	0.577946	8.91399	4.7045	3.88724
ENSRNOG00000006934	Acvr1b	chr7:142817157-142860572	+	protein_coding	2.32145	4.99836	0.00502847	0.0225653	5.71727	3.39581	8.46775	16.8957	5.88219	57.5734	51.8201	46.0658
ENSRNOG00000006949	C1qbp	chr10:57613879-57618527	-	protein_coding	0.999071	1.99871	0.00167957	0.0123551	5.37017	4.3711	20.6377	18.7748	19.7096	46.1849	41.889	33.9621
ENSRNOG00000007002	Lif	chr14:84482674-84500642	+	protein_coding	3.09001	8.51505	0.000613883	0.00755034	3.58436	0.494341	0.40317	0.62769	0.223919	16.7589	9.79443	8.00285
ENSRNOG00000007012	Ly75	chr3:46365165-46457201	-	protein_coding	1.31669	2.49093	0.00059814	0.00745395	3.36803	2.05134	2.89697	3.47986	3.07902	7.77678	9.85507	10.5522
ENSRNOG00000007053	Med7	chr10:31532250-31536405	+	protein_coding	0.959	1.94396	0.00665472	0.0265475	4.15442	3.19542	7.85707	8.54276	8.09462	15.0441	21.9155	14.3591
ENSRNOG00000007081	Xdh	chr6:25149235-25211494	-	protein_coding	1.30595	2.47246	2.70904e-05	0.00268046	8.16438	6.85843	110.864	120.854	113.616	278.365	274.784	305.496
ENSRNOG00000007083	Gpn2	chr5:151806458-151813954	+	protein_coding	0.600211	1.51594	0.00343785	0.0182254	3.63949	3.03928	7.66767	6.30641	7.77271	11.9383	11.7875	10.6982
ENSRNOG00000007114	Psma6	chr6:76174452-76205426	+	protein_coding	0.92837	1.90313	0.000237377	0.00496715	7.28532	6.35695	83.6267	79.3268	80.0087	154.026	169.302	142.773
ENSRNOG00000007125	Vps54	chr14:106153575-106207658	+	protein_coding	2.14677	4.42835	0.000272953	0.00529268	6.66438	4.51761	22.2507	21.2404	22.2399	117.3	109.844	78.5872
ENSRNOG00000007128	Nop56	chr3:122803772-122808558	+	protein_coding	1.47415	2.77819	0.00129814	0.0109629	5.4712	3.99706	15.9894	15.1403	13.846	52.7448	44.7697	34.4874
ENSRNOG00000007134	Strap	chr4:171730635-171745377	+	protein_coding	0.71173	1.63777	0.00240313	0.0149289	4.88948	4.17775	17.0607	16.4579	17.8	31.8283	29.519	24.9908
ENSRNOG00000007137	Ly6i	chr7:116419578-116425003	-	protein_coding	2.61596	6.13031	0.00798803	0.0296789	8.48471	5.86876	65.0128	88.2719	32.8588	489.297	411.755	226.148
ENSRNOG00000007158	Qtrt1	chr8:22446661-22454439	+	protein_coding	1.03729	2.05237	0.0214563	0.0555923	2.51464	1.47735	1.89669	1.73917	1.72055	6.0778	5.81152	2.87084
ENSRNOG00000007159	Ccl2	chr10:69412017-69413870	+	protein_coding	7.39419	168.218	1.83426e-05	0.00253197	8.91978	1.52559	2.91356	1.79989	1.17787	385.434	480.87	609.043
ENSRNOG00000007213	Yars	chr5:147375350-147403571	+	protein_coding	1.16001	2.23459	0.000250146	0.00510467	4.67455	3.51454	10.334	10.3701	10.5825	27.5772	24.5409	21.8184
ENSRNOG00000007241	Fnbp4	chr3:79570625-79610454	+	protein_coding	1.2791	2.42688	0.0175161	0.0484512	5.95197	4.67287	25.6392	22.0214	26.0625	93.4027	55.2828	43.6483
ENSRNOG00000007284	Slc2a1	chr5:138154673-138182897	+	protein_coding	2.02241	4.06262	0.0221445	0.0568286	5.61904	3.59663	11.8561	12.604	9.123	22.6641	81.1458	60.0697
ENSRNOG00000007285	Tp53rk	chr3:163552166-163555596	+	protein_coding	0.802559	1.74419	0.00542543	0.0236092	2.76738	1.96483	3.2435	3.05232	2.45928	6.40812	6.35279	4.79478
ENSRNOG00000007292	Spdl1	chr10:19628258-19652898	-	protein_coding	0.724017	1.65178	0.00327131	0.0177305	2.46996	1.74594	2.43269	2.06734	2.58379	4.13196	5.3045	4.25603
ENSRNOG00000007319	Trib3	chr3:147813473-147819571	-	protein_coding	0.896986	1.86217	0.00957129	0.033052	2.65536	1.75837	2.29768	2.63579	2.22969	7.03242	4.99182	4.19543
ENSRNOG00000007349	Ascc2	chr14:84876781-84913617	+	protein_coding	0.878848	1.83891	0.0258724	0.0631524	4.76152	3.88267	12.3584	15.5041	13.5563	35.6396	25.2684	19.7345
ENSRNOG00000007350	Rac2	chr7:119783849-119797098	-	protein_coding	1.37813	2.59932	0.000432573	0.00651233	7.35168	5.97355	68.5984	55.0984	62.5482	170.939	175.132	142.885
ENSRNOG00000007365	Il22	chr7:61236037-61240502	+	protein_coding	2.60321	6.07638	0.0398474	0.0861967	2.60321	0	0	0	0	6.4083	14.3637	0.971154
ENSRNOG00000007372	Casp1	chr8:2604962-2614631	+	protein_coding	0.868974	1.82636	0.0123159	0.0386789	5.99252	5.12355	34.2746	31.6834	35.7483	48.4507	77.3185	65.6424
ENSRNOG00000007390	Nfkbia	chr6:76267228-76270457	-	protein_coding	2.86132	7.26682	0.000175513	0.00446022	10.2292	7.3679	151.101	185.155	158.173	1518.98	1188.93	955.203
ENSRNOG00000007457	Serping1	chr3:72161189-72171078	-	protein_coding	1.6224	3.07886	0.00531654	0.0233379	8.74072	7.11832	145.754	158.421	113.644	311.067	431.921	578.43
ENSRNOG00000007468	Ifng	chr7:61337381-61341419	+	protein_coding	2.67997	6.40844	0.0282876	0.0670776	2.86191	0.181936	0.267415	0.144947	0.006006	9.63093	13.6621	1.46487
ENSRNOG00000007539	Rsad2	chr6:45655954-45669148	-	protein_coding	5.19178	36.5495	6.96319e-05	0.00339194	7.07139	1.87961	1.82573	2.30281	4.3388	143.884	111.588	148.139
ENSRNOG00000007545	Angptl4	chr7:18627808-18634079	-	protein_coding	4.63507	24.8482	7.70571e-06	0.00244591	7.39547	2.7604	5.28371	7.1554	5.07054	173.822	150.001	179.799
ENSRNOG00000007597	Rhpn1	chr7:116739062-116748715	+	protein_coding	1.09739	2.13968	0.000615504	0.00755381	1.85607	0.758671	0.599909	0.733802	0.746037	2.2974	3.17714	2.44464
ENSRNOG00000007604	Igsf8	chr13:90692666-90700789	+	protein_coding	1.17675	2.26067	0.00167208	0.012312	4.16399	2.98723	6.67197	7.1258	6.99773	17.886	19.9061	13.5895
ENSRNOG00000007650	Cd63	chr7:3320103-3335582	+	protein_coding	0.69627	1.62031	0.00374038	0.01895	7.80337	7.1071	149.266	145.118	118.339	227.278	232.102	208.475
ENSRNOG00000007687	Sema7a	chr8:62723788-62745868	+	protein_coding	2.86349	7.27774	0.000141018	0.00413869	7.10702	4.24353	18.8594	15.2038	20.1207	109.219	147.399	159.173
ENSRNOG00000007690	Cmpk2	chr6:45683234-45694822	+	protein_coding	3.07995	8.45588	0.00256377	0.0154966	5.34633	2.26637	4.84467	3.33346	3.39685	58.4845	49.6095	21.3654
ENSRNOG00000007738	Hm13	chr3:148150698-148189623	+	protein_coding	0.983787	1.97765	0.00515794	0.0228618	6.23375	5.24996	40.0666	35.6642	35.5977	87.3464	79.4685	58.954
ENSRNOG00000007739	Rars	chr10:20633632-20658100	-	protein_coding	1.70602	3.26259	0.000594112	0.00743229	6.11107	4.40505	19.4176	19.8731	21.3133	68.2363	83.5724	55.4001
ENSRNOG00000007752	Zmynd19	chr3:2158995-2168370	+	protein_coding	1.07912	2.11274	0.00123349	0.010704	3.47435	2.39523	3.89265	4.30714	4.60671	10.0778	11.8492	8.64543
ENSRNOG00000007779	Kank4	chr5:117376423-117440254	-	protein_coding	0.638541	1.55675	0.0294754	0.0690052	3.99286	3.35432	7.76794	10.626	9.49353	18.4548	12.6479	14.1992
ENSRNOG00000007793	Pnrc1	chr5:48501472-48504511	-	protein_coding	1.74631	3.355	0.00932564	0.0325721	2.60797	0.861659	0.35148	0.749808	1.53721	7.50374	4.85519	3.55075
ENSRNOG00000007830	Apold1	chr4:168752133-168755023	+	protein_coding	3.61136	12.2216	0.0194805	0.0521069	5.30462	1.69325	5.13924	4.50868	0	53.171	52.2006	20.4222
ENSRNOG00000007851	Psma3	chr6:93423002-93444240	+	protein_coding	0.846665	1.79834	1.17726e-05	0.00253197	5.45938	4.61272	23.9436	23.8503	22.6268	42.5739	44.1772	42.2679
ENSRNOG00000007881	Mtmr14	chr4:145195070-145238097	+	protein_coding	0.632928	1.55071	0.00203245	0.0136463	4.15492	3.52199	10.3171	9.97342	11.2066	16.4511	18.6816	15.4582
ENSRNOG00000007884	Bcap29	chr6:50883787-50923510	-	protein_coding	0.898111	1.86362	0.0277135	0.0661258	4.6561	3.75799	9.37953	14.8711	14.0319	27.3159	27.9186	18.5734
ENSRNOG00000007886	Orm1	chr5:79179417-79182820	+	protein_coding	6.96713	125.116	0.000228345	0.00491246	7.60206	0.634929	0.164661	0.728357	0.860223	238.67	313.527	96.2904
ENSRNOG00000007946	Bcl2l1	chr3:148259596-148313810	-	protein_coding	0.615623	1.53222	0.00719739	0.0277717	5.85383	5.2382	39.8563	33.1536	37.5366	60.8852	60.6546	49.6966
ENSRNOG00000007968	RGD1305350	chr5:164751440-164757680	+	protein_coding	0.93987	1.91836	0.000548961	0.00717705	4.35983	3.41996	10.5885	8.61213	10.0074	19.9834	20.4332	18.2467
ENSRNOG00000007984	Amer1	chrX:64686623-64702441	-	protein_coding	0.616902	1.53358	0.0283516	0.0671915	0.692149	0.0752473	0.042024	0.07019	0.048616	0.437162	0.409106	1.08268
ENSRNOG00000008045	Slamf9	chr13:90836361-90839411	-	protein_coding	0.934978	1.91186	0.0421961	0.0899	3.12059	2.18561	3.75961	5.05088	2.269	10.1124	7.1955	6.22421
ENSRNOG00000008048	Plscr1	chr8:99625545-99725217	+	protein_coding	1.84609	3.59526	0.00238946	0.0148822	6.48541	4.63931	25.7912	22.5033	23.5809	103.198	109.914	61.2386
ENSRNOG00000008106	Shmt2	chr7:70824715-70829815	-	protein_coding	1.75715	3.38031	0.00249185	0.0152898	4.99725	3.24009	11.2873	5.98837	8.82342	28.7597	28.5523	36.0463
ENSRNOG00000008108	Ubr7	chr6:126636491-126656507	+	protein_coding	0.72915	1.65766	0.0475343	0.0979443	3.26241	2.53326	5.683	4.43241	4.34319	6.13538	11.5559	8.86252
ENSRNOG00000008134	Mefv	chr10:12046541-12056311	+	protein_coding	1.22574	2.33875	0.00375186	0.0189766	2.27799	1.05225	1.12818	1.00406	1.091	2.83018	3.80365	5.20064
ENSRNOG00000008144	Irf1	chr10:39109522-39116531	+	protein_coding	3.83305	14.2516	2.27597e-05	0.00259375	7.93383	4.10079	16.8433	16.4446	15.2272	266.482	279.38	193.95
ENSRNOG00000008161	Pdzk1ip1	chr5:133896141-133900726	+	protein_coding	2.41875	5.34707	0.0184717	0.0502491	5.01815	2.5994	6.99173	2.98199	5.99435	21.0263	68.4205	21.2539
ENSRNOG00000008194	Znfx1	chr3:163787101-163847671	-	protein_coding	1.84763	3.59908	0.00302378	0.0169903	5.3328	3.48517	8.42246	15.5804	7.98794	40.838	36.7444	40.4545
ENSRNOG00000008196	Parp12	chr4:66849554-66899914	-	protein_coding	1.79224	3.46352	0.000200893	0.00471567	5.6575	3.86526	13.7099	14.6658	12.4311	45.9946	58.7094	44.8287
ENSRNOG00000008209	St3gal1	chr7:107895109-107963142	-	protein_coding	2.11895	4.34376	0.0285911	0.0674892	5.94873	3.82978	11.6891	13.74	14.3714	116.803	26.0153	73.0408
ENSRNOG00000008246	Emilin1	chr6:26821255-26828972	-	protein_coding	0.976305	1.96742	0.00637665	0.0259473	4.92783	3.95153	13.7576	16.2651	13.5344	26.9734	25.2806	37.3614
ENSRNOG00000008256	Mrpl38	chr10:104682374-104689178	-	protein_coding	0.949616	1.93136	0.00581006	0.0245057	3.98739	3.03778	8.14156	6.57447	6.99858	16.3074	17.0554	11.7684
ENSRNOG00000008277	Bag1	chr5:57254421-57267002	-	protein_coding	0.955508	1.93926	0.0462958	0.0962378	5.47666	4.52116	22.0407	21.5072	22.345	34.0369	69.8088	34.5883
ENSRNOG00000008283	B4galt5	chr3:164039731-164095878	-	protein_coding	2.05351	4.15115	9.6699e-05	0.00373022	6.26313	4.20962	18.4552	18.074	16.0681	69.6406	89.3354	69.9997
ENSRNOG00000008287	Nle1	chr10:70250959-70259553	-	protein_coding	0.997215	1.99614	0.0235348	0.0592463	3.49011	2.49289	5.88128	4.09165	4.09072	12.6432	11.8767	7.07531
ENSRNOG00000008292	Hif1a	chr6:96810907-96856052	+	protein_coding	1.56043	2.94941	4.82665e-05	0.00312011	6.23096	4.67053	23.9583	24.3826	25.0709	68.795	82.9313	71.3382
ENSRNOG00000008307	Nanp	chr3:146800019-146812989	-	protein_coding	1.18316	2.27074	0.00091759	0.00914296	1.20014	0.0169755	0	0	0.03593	1.76214	1.06782	1.12361
ENSRNOG00000008331	RGD1309995	chr7:26311094-26361221	-	protein_coding	0.921973	1.8947	0.000141438	0.00413869	5.33635	4.41438	19.1964	19.7754	22.1076	38.0328	40.544	39.6693
ENSRNOG00000008336	Tnfrsf11b	chr7:93798545-93826665	-	protein_coding	0.666029	1.5867	0.022662	0.057658	4.58772	3.92169	11.8591	14.1933	16.8145	23.9614	26.3362	19.3757
ENSRNOG00000008400	Pml	chr8:63004870-63034226	-	protein_coding	0.92493	1.89859	0.00072418	0.00814922	3.94131	3.01638	7.41129	6.94991	6.92199	12.5441	15.8945	14.8438
ENSRNOG00000008411	Sec23b	chr3:138715570-138757111	+	protein_coding	0.897457	1.86278	0.00250438	0.0153366	5.58318	4.68572	22.0524	26.7032	25.6919	49.9888	51.134	40.4491
ENSRNOG00000008482	Rbms1	chr3:46803355-47025128	-	protein_coding	0.680454	1.60264	0.000604878	0.00747507	5.65141	4.97096	28.6654	29.9851	32.5597	50.6009	46.1865	51.1504
ENSRNOG00000008510	Abtb2	chr3:93495106-93647721	+	protein_coding	1.70838	3.26793	0.000600763	0.00745469	2.78525	1.07687	1.19047	0.828638	1.34339	6.10772	6.98654	4.77087
ENSRNOG00000008525	Csf3	chr10:86616785-86619157	+	protein_coding	6.21315	74.1896	0.000129541	0.0040015	6.39969	0.186543	0.238732	0.189839	0	103.343	119.884	46.7158
ENSRNOG00000008555	Rps20	chr5:16706082-16706909	-	protein_coding	0.673433	1.59486	0.0124453	0.0389313	7.3156	6.64217	98.1442	97.0454	101.514	181.857	170.404	127.977
ENSRNOG00000008575	Aoc1	chr4:78496043-78515584	+	protein_coding	5.05819	33.317	3.48455e-05	0.00285914	7.06706	2.00887	2.73458	4.23735	2.33301	113.163	163.201	127.613
ENSRNOG00000008586	Aldh1l2	chr7:26375866-26425108	+	protein_coding	0.762674	1.69663	0.00305828	0.0170736	0.863857	0.101183	0.023757	0.081838	0.114341	0.55912	0.916043	1.0177
ENSRNOG00000008588	Batf	chr6:109562587-109584545	+	protein_coding	3.37873	10.4016	4.69873e-05	0.00312011	5.03894	1.66021	2.35354	2.33946	1.81929	37.245	34.0502	25.5066
ENSRNOG00000008602	Steap4	chr4:23090029-23135354	-	protein_coding	3.47474	11.1173	0.0138278	0.0413895	7.07625	3.60151	14.4887	17.0476	5.39819	238.25	194.681	51.492
ENSRNOG00000008639	Pabpc1	chr7:75409581-75422268	-	protein_coding	0.709936	1.63573	0.00574724	0.024365	8.44228	7.73234	208.492	200.951	226.295	377.365	377.601	292.796
ENSRNOG00000008642	Snx11	chr10:84628424-84639111	-	protein_coding	1.17313	2.25501	0.0468177	0.0968871	3.62835	2.45522	4.63829	5.26847	3.6663	18.7811	11.4379	6.68656
ENSRNOG00000008713	Slc41a2	chr7:26522314-26607861	+	protein_coding	1.83529	3.56844	1.96085e-05	0.00253197	3.54751	1.71222	2.32609	2.56515	1.9667	10.8894	10.6331	10.5574
ENSRNOG00000008736	Slamf8	chr13:90967739-90977734	-	protein_coding	3.0655	8.3716	0.00247421	0.0152228	4.28787	1.22236	1.91994	1.80031	0.553545	12.1391	28.9478	17.9408
ENSRNOG00000008759	Csf3r	chr5:144031402-144051600	+	protein_coding	2.91802	7.55809	0.00366186	0.0186858	4.58025	1.66223	2.76665	2.46993	1.42585	13.0426	23.3087	39.1023
ENSRNOG00000008945	Nans	chr5:62109328-62126494	+	protein_coding	1.33627	2.52498	0.0103065	0.0346489	5.20637	3.8701	9.42994	18.1293	14.67	32.7182	32.3304	43.7836
ENSRNOG00000008965	AC124896.1	chr7:36495480-36499784	-	protein_coding	1.87272	3.66223	0.000360825	0.00603161	6.79935	4.92663	27.5203	33.9281	27.2398	130.591	108.972	94.481
ENSRNOG00000009028	Rnf126	chr7:12820840-12828334	+	protein_coding	1.36484	2.57547	0.00120252	0.0105359	4.4742	3.10936	9.20813	7.16308	6.71322	24.9137	19.2546	19.9196
ENSRNOG00000009071	Gripap1	chrX:15523929-15553720	-	protein_coding	0.98274	1.97622	4.40421e-05	0.00312011	5.07848	4.09574	16.7693	15.1366	16.4317	33.205	31.4919	33.7105
ENSRNOG00000009131	Zc3h12a	chr5:143111074-143120165	-	protein_coding	4.73683	26.6641	0.000150878	0.00421193	7.33373	2.5969	5.39406	5.59995	4.2471	216.165	184.513	103.197
ENSRNOG00000009134	Mad2l2	chr5:164950917-164956255	+	protein_coding	0.856252	1.81033	0.000922771	0.00916657	3.38387	2.52762	5.08876	4.22741	5.02358	9.67864	8.54938	10.1545
ENSRNOG00000009163	Fam133b	chr4:27730051-27755103	-	protein_coding	1.06011	2.08509	0.0363761	0.0804345	5.32597	4.26586	21.0765	15.6119	18.4136	58.2466	38.7596	26.3983
ENSRNOG00000009197	Asb4	chr4:30313102-30501329	+	protein_coding	0.698654	1.62299	0.0296357	0.0693136	0.698654	0	0	0	0	1.15019	0.511743	0.315206
ENSRNOG00000009243	Oaf	chr8:47511719-47529689	-	protein_coding	1.83161	3.55933	0.0356065	0.0790935	5.34861	3.51701	7.50209	6.55207	22.3658	52.4171	44.2034	27.0172
ENSRNOG00000009267	B3gnt2	chr14:107592336-107617161	-	protein_coding	0.940081	1.91864	0.00588983	0.0247278	5.20226	4.26218	19.7323	17.3616	17.5597	43.6332	36.3411	28.9408
ENSRNOG00000009282	Nub1	chr4:6951478-6978073	-	protein_coding	0.828188	1.77545	0.00449913	0.0211569	6.07944	5.25126	34.8802	38.2566	38.2274	55.1811	75.9406	70.5384
ENSRNOG00000009296	Snapc1	chr6:96871625-96893444	+	protein_coding	2.12397	4.35893	0.000794516	0.00850858	4.4667	2.34272	4.05097	4.37675	3.80613	17.0422	29.1631	18.8639
ENSRNOG00000009331	Hck	chr3:148579920-148623033	+	protein_coding	1.10203	2.14657	0.0172325	0.0479183	5.71309	4.61106	21.824	21.4095	27.535	37.6632	51.0159	70.78
ENSRNOG00000009355	Ogfr	chr3:175930505-176099987	+	protein_coding	2.1658	4.48716	0.00125961	0.0107883	6.82695	4.66114	23.1651	20.2964	30.473	99.6666	150.562	94.9118
ENSRNOG00000009370	Tbkbp1	chr10:85071064-85084850	-	protein_coding	1.17495	2.25785	0.00339453	0.0181095	4.17897	3.00402	7.42837	5.69025	8.15623	14.6314	16.7668	20.3983
ENSRNOG00000009381	Mapk6	chr8:82328020-82351108	-	protein_coding	1.19663	2.29204	0.0254771	0.0624812	4.30072	3.10409	7.12833	7.32377	8.39618	28.8834	18.2951	12.2758
ENSRNOG00000009389	Ripk2	chr5:29838747-29870735	-	protein_coding	1.7982	3.47787	9.03953e-05	0.00363468	4.31899	2.52079	4.25407	5.39781	4.62304	20.4969	19.5179	17.0272
ENSRNOG00000009401	Lmo2	chr3:93909156-93931871	+	protein_coding	0.617325	1.53403	0.0218246	0.0562765	4.84553	4.2282	17.6923	16.2797	19.3821	33.6705	27.6599	22.9174
ENSRNOG00000009427	Tbx21	chr10:85032799-85049331	-	protein_coding	0.836134	1.78526	0.000476817	0.00675204	2.71391	1.87778	2.85546	2.34347	2.8506	5.85002	5.64313	5.20643
ENSRNOG00000009481	Ddhd1	chr15:19965187-20032191	-	protein_coding	1.77877	3.43133	0.00621037	0.0255134	5.07617	3.29741	8.99802	8.73688	8.76162	51.7899	29.3013	23.001
ENSRNOG00000009499	Hinfp	chr8:48628340-48634797	-	protein_coding	0.682825	1.60528	0.00808615	0.02988	3.25255	2.56972	5.16386	4.48731	5.18701	10.3486	7.53083	7.94149
ENSRNOG00000009530	RGD1561252	chr15:86153628-86198127	+	protein_coding	1.75575	3.37701	0.000983393	0.00946196	4.85882	3.10308	7.23117	8.24053	7.34065	33.9952	30.3354	21.2798
ENSRNOG00000009595	Zbtb48	chr5:169191753-169200109	-	protein_coding	1.64003	3.11672	0.00482628	0.0220303	4.41886	2.77883	6.25909	6.24626	5.14525	29.3469	19.7172	14.5662
ENSRNOG00000009640	Psmf1	chr3:147238114-147263275	-	protein_coding	1.40646	2.65086	1.05977e-05	0.00251647	6.20021	4.79374	28.1343	25.982	26.1458	70.3082	76.3832	71.0374
ENSRNOG00000009673	Dhrs13	chr10:65329940-65334500	-	protein_coding	0.784809	1.72286	0.000137944	0.00411934	3.21282	2.42801	4.40229	4.40782	4.33475	8.10348	8.9691	7.78221
ENSRNOG00000009730	Cyp7b1	chr2:102701903-102871257	-	protein_coding	4.55456	23.4996	2.46679e-05	0.00260395	5.87144	1.31688	1.1666	1.66308	1.67975	73.3487	47.9379	54.1466
ENSRNOG00000009734	Akr1b8	chr4:61771970-61828657	+	protein_coding	1.5771	2.9837	3.89087e-05	0.00297339	4.65135	3.07425	6.79585	7.40585	8.11759	22.8151	25.6035	24.0496
ENSRNOG00000009754	Nampt	chr6:52122085-52156472	+	protein_coding	2.48989	5.61737	0.00136478	0.0111543	7.4001	4.9102	28.702	28.6084	29.9138	215.044	202.549	108.582
ENSRNOG00000009768	Npy	chr4:79557854-79565097	+	protein_coding	1.5056	2.83943	0.0314085	0.0722629	4.65006	3.14446	10.6919	3.918	11.0242	24.9691	29.8987	18.7256
ENSRNOG00000009797	Aqp3	chr5:57423734-57429245	-	protein_coding	2.26044	4.79139	0.021691	0.0560397	3.02596	0.76552	0.625182	0.86802	0.618265	13.5139	9.49994	2.54607
ENSRNOG00000009832	Slc39a14	chr15:51982982-52029816	-	protein_coding	4.64306	24.9862	0.000378167	0.00611281	6.03023	1.38718	2.52993	0.499513	2.38088	71.8802	54.5087	68.0038
ENSRNOG00000009850	St3gal4	chr8:36264750-36314811	-	protein_coding	1.55829	2.94504	0.0177201	0.0487614	6.77261	5.21432	45.9713	28.0757	36.4658	168.847	102.835	73.1094
ENSRNOG00000009857	Ftsj3	chr10:94439077-94445503	-	protein_coding	1.21536	2.32199	0.000298914	0.0055143	4.74045	3.52509	10.5521	10.0172	10.9879	28.6089	26.4011	22.5432
ENSRNOG00000009899	Skil	chr2:115866701-115891097	-	protein_coding	0.67066	1.5918	0.0103123	0.0346489	5.03858	4.36792	17.0091	21.4806	20.7435	31.1681	36.7741	28.2196
ENSRNOG00000009907	Mmp8	chr8:5768811-5778702	+	protein_coding	3.53491	11.5908	0.000324117	0.00569057	4.99856	1.46365	2.16918	1.04528	2.23675	27.2183	25.8071	42.1884
ENSRNOG00000009919	Irg1	chr15:93613022-93622332	+	protein_coding	6.4136	85.2484	6.85165e-06	0.00244591	6.53333	0.119729	0.163564	0.102391	0	93.3369	115.637	71.2217
ENSRNOG00000009928	Bckdhb	chr8:91464229-91656134	+	protein_coding	0.898468	1.86409	0.000261239	0.00520741	4.97011	4.07164	15.4143	16.6881	15.3739	31.484	32.037	27.6936
ENSRNOG00000009951	Aif1l	chr3:9237944-9262628	-	protein_coding	1.13812	2.20094	0.0486749	0.0995991	2.25085	1.11273	1.39515	1.38788	0.768259	6.51777	3.74223	2.02444
ENSRNOG00000009963	Ctps1	chr5:139475934-139505065	-	protein_coding	1.37508	2.59382	0.00548364	0.0237499	6.25224	4.87716	27.0938	27.8871	30.2753	94.8649	83.823	53.4708
ENSRNOG00000009980	Plpp1	chr2:44664124-44726689	+	protein_coding	2.45048	5.46598	6.28079e-05	0.00335624	7.1383	4.68782	25.9959	25.6178	22.826	120.692	164.34	137.959
ENSRNOG00000009983	Lrrc42	chr5:126835155-126856292	-	protein_coding	0.775605	1.71191	0.00315852	0.017373	5.22696	4.45136	23.5625	18.1734	21.2333	39.1949	36.9071	33.4768
ENSRNOG00000009992	Rabggtb	chr2:260110309-260115577	-	protein_coding	0.864229	1.82037	0.00938239	0.0326665	6.07414	5.20991	41.8564	28.2386	39.462	71.3054	67.5107	60.7402
ENSRNOG00000010015	Gp9	chr4:119680112-119682547	+	protein_coding	1.9619	3.89575	0.000150377	0.00421193	2.98607	1.02416	1.18389	0.700581	1.26507	7.49787	6.76547	6.53716
ENSRNOG00000010028	Polr3d	chr15:52129471-52134140	-	protein_coding	0.78049	1.71771	0.0439988	0.0928296	4.24212	3.46163	8.18736	11.4689	10.6719	12.7346	22.044	20.4111
ENSRNOG00000010058	Spry2	chr15:90172975-90175802	-	protein_coding	0.619856	1.53672	0.0077839	0.0292583	5.17411	4.55425	24.7674	22.1114	20.7773	37.2375	38.301	30.3179
ENSRNOG00000010085	Cldn10	chr15:104026601-104115748	+	protein_coding	1.86777	3.64969	0.00415752	0.0201745	4.7156	2.84783	5.33541	7.87683	5.63454	18.8763	22.9896	37.041
ENSRNOG00000010111	Exoc3l4	chr6:135866739-135880721	+	protein_coding	1.61203	3.05682	0.00184857	0.0130008	3.66031	2.04827	3.52067	3.23929	2.69215	8.62792	12.6643	14.3627
ENSRNOG00000010164	Mrps2	chr3:7051695-7058521	+	protein_coding	1.60851	3.04938	0.0271092	0.0651436	3.62679	2.01827	4.72637	4.20843	1.22893	14.5115	11.3279	8.85762
ENSRNOG00000010165	Tnfaip2	chr6:135890931-135903647	+	protein_coding	4.10746	17.2373	5.95961e-05	0.00331589	7.34557	3.23811	8.98263	9.01619	7.40151	142.168	218.238	136.071
ENSRNOG00000010174	Enpp4	chr9:19448269-19457946	+	protein_coding	1.16047	2.23531	0.000574302	0.00731969	6.75204	5.59157	47.3663	43.5391	51.0482	100.155	122.288	99.414
ENSRNOG00000010181	Clec4d	chr4:156253079-156264769	+	protein_coding	2.14492	4.42269	1.76445e-05	0.00253197	3.85665	1.71172	2.56733	2.31776	1.96927	13.3955	14.3315	12.7748
ENSRNOG00000010208	Timp1	chrX:1364786-1369384	-	protein_coding	4.74314	26.7811	2.67803e-05	0.00268046	9.39323	4.65009	22.1104	29.7639	21.2638	784.194	714.95	539.847
ENSRNOG00000010209	Nol12	chr7:120161091-120167020	+	protein_coding	1.39658	2.63277	0.0244476	0.0608178	3.88361	2.48703	7.08811	5.19967	2.51397	17.8843	12.0253	12.0726
ENSRNOG00000010210	Slc7a11	chr2:139453774-139528162	-	protein_coding	2.04062	4.11422	0.0220225	0.0566454	2.20744	0.166817	0.133164	0.109648	0.125053	5.67512	5.95265	1.12278
ENSRNOG00000010219	Ralgds	chr3:7109920-7130548	+	protein_coding	0.983548	1.97732	0.0278136	0.0662887	5.24632	4.26278	18.148	18.4908	17.9547	25.1147	51.1424	39.1629
ENSRNOG00000010278	Il6	chr4:3043231-3047807	+	protein_coding	5.52209	45.9531	4.33657e-06	0.00229601	6.01574	0.493653	0.239743	0.689982	0.332291	71.0777	63.41	57.3451
ENSRNOG00000010298	Xbp1	chr14:85753760-85758145	+	protein_coding	0.831257	1.77924	0.00432977	0.0206949	7.43045	6.59919	102.3	96.5648	89.4211	145.749	172.892	200.146
ENSRNOG00000010331	Ctsb	chr15:46316741-46337612	+	protein_coding	1.16493	2.24223	0.0411793	0.0884202	8.69114	7.52621	176.251	204.627	170.859	534.407	542.428	241.692
ENSRNOG00000010332	Nipsnap3b	chr5:69833225-69849112	+	protein_coding	1.23254	2.3498	0.0325884	0.0742493	3.53735	2.30482	2.02074	6.52109	4.30961	10.6539	10.8701	10.3142
ENSRNOG00000010337	Slc13a2	chr10:65664667-65692023	-	protein_coding	2.26186	4.7961	9.18125e-05	0.00363468	3.6509	1.38904	1.4912	1.65322	1.71797	13.7297	11.6978	9.5966
ENSRNOG00000010370	Tnip1	chr10:40255776-40296470	-	protein_coding	2.62005	6.1477	3.64599e-05	0.00289747	7.86548	5.24543	35.6054	36.598	38.6633	211.789	213.607	276.743
ENSRNOG00000010427	Ipo7	chr1:174655939-174696173	+	protein_coding	0.936608	1.91402	0.000276111	0.00531853	5.51392	4.57731	21.4476	23.342	23.8999	41.485	44.4041	48.4579
ENSRNOG00000010452	Cycs	chr4:80331227-80333326	-	protein_coding	1.14081	2.20505	0.00028887	0.00542068	5.23777	4.09696	16.5484	15.6087	16.193	40.8835	37.267	32.5207
ENSRNOG00000010478	LOC299282	chr6:127941526-128080889	+	protein_coding	3.70495	13.0407	0.0129399	0.0398388	3.92211	0.217158	0.109356	0.272941	0.112331	5.2443	46.5109	10.742
ENSRNOG00000010507	Mmp7	chr8:5893249-5901049	+	protein_coding	1.19384	2.28761	0.044909	0.0942577	1.35464	0.160797	0.142361	0.222955	0	0.622216	1.41383	3.27114
ENSRNOG00000010513	Tfpi2	chr4:28947965-28953067	-	protein_coding	6.26523	76.9168	0.000221867	0.00485379	7.0119	0.746675	0.552889	0.779248	0.709771	220.449	139.833	67.9286
ENSRNOG00000010523	Naa20	chr3:140106766-140125220	+	protein_coding	1.51956	2.86703	5.84303e-05	0.00331589	6.23975	4.72019	25.8495	24.8902	25.3442	77.1548	80.8402	66.4733
ENSRNOG00000010529	Thbs2	chr1:56653938-56683731	-	protein_coding	0.877842	1.83762	0.0130131	0.0399269	1.88218	1.00434	1.03528	1.25907	0.755711	1.88795	3.24547	3.08565
ENSRNOG00000010574	Ptpn1	chr3:164665532-164711848	+	protein_coding	2.02971	4.08324	0.000165993	0.00434469	5.97981	3.95009	14.1487	13.5609	15.7388	63.9276	72.1138	51.9511
ENSRNOG00000010603	Gzma	chr2:44968765-44981458	-	protein_coding	1.94298	3.84499	0.00420572	0.0203135	6.46111	4.51813	28.347	15.2949	24.1574	112.004	88.0767	66.937
ENSRNOG00000010626	Sphk1	chr10:105498728-105504393	+	protein_coding	1.08442	2.12052	0.0158311	0.0452143	1.73623	0.651814	0.808846	0.323404	0.620143	3.5578	1.63649	2.07744
ENSRNOG00000010629	Nod1	chr4:85123960-85174951	-	protein_coding	1.96956	3.91648	0.00153785	0.011888	5.56171	3.59216	9.74774	13.4247	10.314	47.7414	59.4744	34.7485
ENSRNOG00000010735	Nfyc	chr5:139687448-139749050	-	protein_coding	0.73243	1.66143	2.06331e-05	0.00255145	4.51011	3.77768	12.6945	12.9216	12.5316	22.2537	22.2551	20.8788
ENSRNOG00000010756	Tp53	chr10:56187020-56198449	+	protein_coding	1.17021	2.25044	0.000710591	0.00807354	5.38332	4.21311	19.1567	17.4968	16.1121	42.5644	35.2652	45.0262
ENSRNOG00000010760	E2f5	chr2:88351361-88366115	-	protein_coding	0.610503	1.52679	0.0369871	0.0814122	3.18715	2.57665	5.33075	3.91443	5.82365	9.53153	8.41992	6.61633
ENSRNOG00000010775	Arrdc4	chr1:129766100-129780356	-	protein_coding	2.55839	5.89049	0.000482241	0.00677606	5.06344	2.50505	4.89225	3.79912	5.4691	28.171	27.6363	43.7584
ENSRNOG00000010776	Atp13a1	chr16:21364101-21380331	-	protein_coding	1.76941	3.40914	0.000883329	0.00894692	5.78884	4.01943	18.1211	13.4939	14.3889	67.2831	46.3852	51.2257
ENSRNOG00000010783	Mak16	chr16:64729221-64737807	+	protein_coding	0.876756	1.83624	0.0227124	0.0576965	3.56212	2.68536	4.91515	6.78887	4.77672	13.4194	8.04478	11.6347
ENSRNOG00000010824	Parp8	chr2:49087226-49170025	-	protein_coding	0.866061	1.82268	0.0121882	0.0384997	4.67287	3.80681	13.2515	13.8629	11.9399	30.2853	25.6159	18.9315
ENSRNOG00000010833	Mthfd2	chr4:115004448-115015965	-	protein_coding	1.30984	2.47914	0.00134068	0.0110996	3.30916	1.99932	3.30594	2.54617	3.1854	9.29175	10.4589	7.25728
ENSRNOG00000010849	Adprhl2	chr5:144336312-144341586	-	protein_coding	1.04931	2.06953	0.00940582	0.0327294	5.05605	4.00674	16.2903	13.947	15.0728	38.8238	36.3859	23.7295
ENSRNOG00000010861	Atad1	chr1:251235508-251387002	-	protein_coding	2.61486	6.12563	0.00308386	0.0171607	6.69882	4.08396	28.2323	12.1909	11.6486	101.597	118.836	90.1828
ENSRNOG00000010866	Tmem154	chr2:183674522-183711812	+	protein_coding	0.826707	1.77363	0.0125158	0.0390344	3.52298	2.69627	4.54828	5.83816	6.17597	10.6252	12.7516	8.50199
ENSRNOG00000010889	Fbxw7	chr2:184231260-184309664	-	protein_coding	0.64466	1.56337	0.00508964	0.0227121	3.30368	2.65902	5.5908	5.23085	5.13554	9.90832	9.40585	7.48182
ENSRNOG00000010897	Nek6	chr3:22811927-22888598	+	protein_coding	2.27094	4.82637	0.0106529	0.0352985	4.33167	2.06073	3.1399	3.13113	3.24584	16.1975	38.1959	11.1109
ENSRNOG00000010898	Prok2	chr4:132157556-132171153	-	protein_coding	2.13314	4.3867	0.0254295	0.0623992	2.27982	0.146682	0.034719	0.292526	0.014391	1.39743	3.687	9.19156
ENSRNOG00000010918	Cebpa	chr1:91363492-91366164	+	protein_coding	4.23227	18.7949	0.00226593	0.0144596	4.82798	0.595709	0	0	2.45127	28.8435	22.813	31.2431
ENSRNOG00000010921	Taf1d	chr8:13861459-13871354	+	protein_coding	1.49552	2.81966	0.0125599	0.0391269	5.40306	3.90754	15.9166	12.9173	13.3546	60.9827	43.0459	26.7505
ENSRNOG00000010941	Tifa	chr2:232104809-232137422	+	protein_coding	3.86015	14.5218	1.55489e-05	0.00253197	6.67379	2.81364	6.87804	5.16793	6.15174	115.988	101.835	87.4609
ENSRNOG00000011016	Slc7a2	chr16:54460067-54513349	-	protein_coding	0.603339	1.51923	0.0408016	0.0878166	4.55614	3.9528	12.8322	14.9189	15.8629	27.898	23.1845	17.6295
ENSRNOG00000011027	Uba5	chr8:112578590-112594261	-	protein_coding	0.661985	1.58226	0.00192593	0.0132242	4.94392	4.28194	18.3916	18.025	18.9544	28.9531	27.1088	33.6356
ENSRNOG00000011039	Gch1	chr15:23934585-23969011	-	protein_coding	3.20987	9.25265	0.000853794	0.00880429	5.04407	1.83421	4.25639	2.55348	1.42724	38.6347	26.2421	32.261
ENSRNOG00000011078	Srm	chr5:165405168-165408320	+	protein_coding	1.66211	3.16478	0.000298328	0.0055143	4.08835	2.42624	4.38379	4.98676	3.81766	18.7152	15.1986	14.4124
ENSRNOG00000011205	Ccl3	chr10:70869513-70871066	-	protein_coding	4.00177	16.0196	0.0166797	0.046865	6.61947	2.6177	3.4522	6.4451	5.97553	382.252	52.6728	45.2105
ENSRNOG00000011226	Timm8a1	chrX:105352402-105355716	-	protein_coding	1.43267	2.69946	0.00130952	0.0109684	4.65128	3.21861	8.70481	8.26652	7.96994	29.1405	25.3924	18.9478
ENSRNOG00000011228	Layn	chr8:55447709-55467688	-	protein_coding	0.942431	1.92176	0.0450877	0.0944691	2.54457	1.60214	2.05546	2.39414	1.69818	7.59539	4.69465	3.05738
ENSRNOG00000011284	Sgms2	chr2:236458279-236480502	-	protein_coding	0.855019	1.80878	0.0374819	0.0822419	3.39015	2.53513	5.34067	4.76941	4.32333	10.632	12.578	6.2966
ENSRNOG00000011353	Gfi1b	chr3:7190722-7203420	-	protein_coding	1.01668	2.02325	0.00185318	0.0130008	1.57051	0.553832	0.559274	0.383396	0.466532	1.59274	1.87103	2.51977
ENSRNOG00000011381	Acsbg1	chr8:59184113-59239954	-	protein_coding	1.02593	2.03627	0.00572385	0.0243042	1.85722	0.831289	0.593441	0.917625	0.843439	3.29536	2.84565	1.87918
ENSRNOG00000011398	Trmt61a	chr6:136150785-136250752	+	protein_coding	1.26805	2.40836	0.0107026	0.0353905	1.89339	0.625342	0.648783	0.91987	0.159592	3.57178	2.77819	1.96849
ENSRNOG00000011406	Ccl4	chr10:70884531-70886355	+	protein_coding	4.91088	30.083	0.000130146	0.0040015	7.53919	2.62832	6.18273	3.7822	5.88164	259.332	185.804	131.33
ENSRNOG00000011420	Mtmr7	chr16:54765325-54856225	+	protein_coding	1.00349	2.00484	0.0013209	0.0110149	1.60617	0.602684	0.406337	0.512728	0.64599	2.37503	1.63711	2.17037
ENSRNOG00000011459	Rhbdf2	chr10:105573752-105600913	-	protein_coding	2.17591	4.5187	0.00221526	0.0142804	5.5449	3.36899	10.2601	9.37216	8.44254	29.9295	60.6275	52.3819
ENSRNOG00000011463	Psmb2	chr5:144701949-144734257	+	protein_coding	1.54486	2.91777	0.00491443	0.0222789	7.0549	5.51004	36.5917	52.3144	46.2196	174.901	131.467	99.8865
ENSRNOG00000011483	S100a9	chr2:190097554-190100276	-	protein_coding	4.21296	18.545	0.00020421	0.004726	8.46224	4.24928	23.3854	13.4717	18.4907	251.676	408.697	422.773
ENSRNOG00000011503	Shb	chr5:60971257-61077627	-	protein_coding	0.677041	1.59886	0.00424601	0.0204195	3.82456	3.14752	7.96185	7.56456	8.06541	14.4105	14.23	11.1172
ENSRNOG00000011507	Pick1	chr7:120465130-120484840	+	protein_coding	0.845963	1.79746	0.0110276	0.0359722	3.73517	2.88921	5.96642	7.73274	5.68429	15.3059	10.9622	11.1072
ENSRNOG00000011517	Tnfrsf21	chr9:20546159-20621051	-	protein_coding	0.8149	1.75918	0.00101715	0.00967458	4.09712	3.28222	8.59041	9.1305	8.47702	17.3165	17.1213	14.1021
ENSRNOG00000011553	Actl6a	chr2:119112513-119129751	+	protein_coding	0.625604	1.54286	0.000117841	0.00389319	4.03143	3.40582	10.004	9.51181	9.2928	16.0507	14.8918	15.1371
ENSRNOG00000011568	Rspo3	chr1:30681681-30766860	+	protein_coding	0.595713	1.51122	0.00115729	0.0103636	0.631687	0.0359745	0.077676	0	0	0.657089	0.57002	0.429616
ENSRNOG00000011586	LOC100909712	chr2:157747542-157759838	-	protein_coding	1.64444	3.12627	0.00227087	0.0144804	7.06778	5.42333	45.9546	38.8203	41.2646	182.703	113.776	113.518
ENSRNOG00000011611	Mapk1ip1l	chr15:24078280-24101821	+	protein_coding	0.798966	1.73985	0.000808097	0.00857822	5.03361	4.23464	18.3549	16.9537	18.2008	33.6136	33.6668	28.2847
ENSRNOG00000011661	Hnrnph2	chrX:105419285-105422861	+	protein_coding	0.594679	1.51014	0.0223606	0.0571488	5.20041	4.60573	23.1846	27.0512	20.2765	32.3747	42.2024	33.4758
ENSRNOG00000011668	Nfil3	chr17:12261102-12276315	+	protein_coding	1.90431	3.74331	0.0436792	0.0923429	3.33145	1.42713	1.29022	1.76538	2.07041	6.20785	23.3223	4.81815
ENSRNOG00000011677	Slc39a10	chr9:60039297-60070552	+	protein_coding	1.36466	2.57515	0.000202107	0.00471789	4.89837	3.53371	10.7371	9.5788	11.5101	25.7919	30.7881	30.1459
ENSRNOG00000011690	Rmdn3	chr3:110943826-110964452	-	protein_coding	1.75083	3.36553	0.000170888	0.00440825	4.98474	3.2339	9.05763	8.07328	8.12527	34.1669	32.5828	25.8791
ENSRNOG00000011706	Mbl1	chr16:18736154-18742193	+	protein_coding	3.17649	9.04104	8.27375e-05	0.00362032	4.13566	0.959168	1.29277	0.856308	0.726651	18.6176	13.2538	18.4221
ENSRNOG00000011718	C1rl	chr4:157107469-157123446	+	protein_coding	1.40709	2.65201	0.00351265	0.0183296	2.71769	1.3106	1.83899	1.95315	0.820299	5.70351	5.19278	5.85691
ENSRNOG00000011774	Fblim1	chr5:160122425-160158386	-	protein_coding	1.59725	3.02566	0.00010501	0.0038093	5.33964	3.74239	11.7386	12.9038	12.5351	44.3736	34.944	39.7142
ENSRNOG00000011796	C1r	chr4:157125998-157136829	+	protein_coding	1.81328	3.5144	0.00102807	0.00972758	8.00271	6.18943	68.0708	90.1876	60.7142	231.454	235.278	306.191
ENSRNOG00000011800	F3	chr2:225310624-225322272	+	protein_coding	1.89285	3.71367	0.00245929	0.0151613	6.53394	4.64109	22.7159	27.1654	22.2579	128.757	87.8522	68.014
ENSRNOG00000011817	Rpl22l1	chr2:115362799-115364729	+	protein_coding	1.17278	2.25446	0.00652104	0.0262848	6.82828	5.6555	60.7499	47.3098	41.9296	111.241	138.249	92.8879
ENSRNOG00000011830	Plekha3	chr3:63536166-63557361	+	protein_coding	0.636968	1.55506	0.0291175	0.068337	4.53604	3.89907	12.6087	14.1507	15.1051	26.6345	23.6996	17.294
ENSRNOG00000011895	LOC691143	chr1:102716649-102741581	-	protein_coding	4.74492	26.814	3.475e-05	0.00285914	6.72115	1.97624	2.93985	3.08611	2.78381	127.71	117.809	75.7964
ENSRNOG00000011932	Snrpa1	chr1:126961389-126974453	+	protein_coding	0.682776	1.60523	0.00407335	0.0199524	4.59	3.90723	14.4386	14.1135	13.4745	27.1202	21.4838	21.0951
ENSRNOG00000011944	Snx10	chr4:81311490-81374158	+	protein_coding	1.61647	3.06624	0.00433386	0.0206949	4.7446	3.12813	10.3508	5.51597	8.03614	24.1194	22.2836	31.9415
ENSRNOG00000011955	AABR07026997.1	chr17:9233514-9234766	-	protein_coding	0.973368	1.96342	0.00910296	0.0321321	8.25848	7.28512	144.306	181.266	142.26	385.765	283.612	259.888
ENSRNOG00000012012	Pinx1	chr15:47211583-47270317	+	protein_coding	0.607991	1.52413	0.0195738	0.0522795	2.55917	1.95118	3.39544	2.45499	2.8075	4.90601	5.84666	4.06276
ENSRNOG00000012019	B3galnt1	chr2:166226754-166255302	-	protein_coding	2.55357	5.87085	0.0299556	0.0698758	4.48215	1.92858	3.34936	4.73549	1.21151	45.2046	24.0432	8.64745
ENSRNOG00000012035	Rnf181	chr4:100222106-100228809	-	protein_coding	0.739423	1.66951	0.00095907	0.00933339	6.28096	5.54154	48.6278	44.9985	43.2631	73.1512	84.6539	73.0305
ENSRNOG00000012036	Pcsk5	chr1:236031988-236313858	+	protein_coding	1.54457	2.91717	0.00083112	0.00867566	4.84896	3.3044	8.86738	8.59935	9.17942	28.1107	22.4082	34.1261
ENSRNOG00000012037	Galnt7	chr16:35934970-36062719	+	protein_coding	0.789512	1.72849	0.0263943	0.0640073	2.13057	1.34106	1.46536	1.70785	1.4355	4.91124	2.50624	3.05111
ENSRNOG00000012081	Txn1	chr5:75049747-75057752	-	protein_coding	1.52501	2.87788	0.00643596	0.0261156	8.74383	7.21882	140.163	132.653	174.206	504.948	524.494	295.341
ENSRNOG00000012083	St6galnac2	chr10:105650862-105668593	-	protein_coding	1.97536	3.93226	0.00885659	0.0315636	5.41816	3.4428	11.0006	8.01361	10.8866	31.3783	31.8145	72.5812
ENSRNOG00000012147	Nop14	chr14:81340041-81362441	+	protein_coding	0.916331	1.88731	0.00173086	0.0125421	3.78766	2.87133	6.15245	6.43846	6.36432	15.3063	12.0417	11.3854
ENSRNOG00000012219	Snrnp40	chr5:148577332-148610639	+	protein_coding	0.849126	1.80141	0.0162506	0.0459792	4.23501	3.38589	9.33451	10.1462	8.91619	21.793	13.2192	19.6025
ENSRNOG00000012264	Alkbh1	chr6:111456187-111477090	-	protein_coding	0.75449	1.68704	0.00962202	0.0331541	3.77405	3.01956	8.30103	6.41463	6.73231	14.9343	12.6854	10.7411
ENSRNOG00000012280	Ptx3	chr2:158097843-158103653	+	protein_coding	5.09337	34.1395	0.010089	0.0341616	6.59632	1.50295	2.47378	2.27676	1.00008	36.0925	56.734	422.009
ENSRNOG00000012314	Slirp	chr6:111476768-111486039	+	protein_coding	0.605513	1.52152	0.00428017	0.0205375	3.40012	2.79461	6.45163	6.3418	5.10559	9.9841	9.82125	8.89857
ENSRNOG00000012378	Dbnl	chr14:86029335-86044364	+	protein_coding	1.63368	3.10303	0.00223538	0.0143338	5.91622	4.28254	18.0818	19.7053	17.6559	74.3957	64.9095	43.3182
ENSRNOG00000012434	Zfp598	chr10:14035149-14047096	+	protein_coding	1.25719	2.39029	0.0167102	0.0469052	5.29934	4.04215	15.9393	15.5833	14.917	57.8813	36.484	26.6667
ENSRNOG00000012439	Bid	chr4:153442218-153465203	-	protein_coding	1.74959	3.36262	0.0161236	0.0457265	4.13236	2.38278	7.22429	2.30394	4.22072	20.7323	12.1275	17.9064
ENSRNOG00000012442	Cemip	chr1:146069771-146226462	-	protein_coding	1.23915	2.36059	0.00396351	0.0196277	1.98029	0.741147	0.778677	0.398553	0.877355	2.37648	3.90287	2.71081
ENSRNOG00000012473	Cflar	chr9:65534704-65587251	+	protein_coding	1.24842	2.37581	1.94264e-05	0.00253197	6.22553	4.97711	30.2638	28.9964	32.3173	71.1221	76.4375	74.0231
ENSRNOG00000012481	Ppm1j	chr2:207262934-207268609	+	protein_coding	1.18731	2.27727	0.0192741	0.0518024	1.66092	0.473618	0.387507	0.53778	0.254845	2.98662	2.80722	1.0833
ENSRNOG00000012509	Il17f	chr9:26885708-26897219	-	protein_coding	2.94934	7.72398	0.00821639	0.0301669	2.96956	0.0202187	0	0	0.04294	6.35237	15.6853	2.91762
ENSRNOG00000012514	Abhd17b	chr1:239266921-239301176	+	protein_coding	0.972386	1.96208	0.00341114	0.0181509	5.3292	4.35681	19.6407	19.1141	19.719	45.2216	42.2527	31.5004
ENSRNOG00000012543	Mcm3	chr9:26914057-26932201	-	protein_coding	0.732601	1.66163	0.0262476	0.0637259	3.24164	2.50904	4.40175	4.79059	4.89705	7.70326	11.5448	6.75091
ENSRNOG00000012557	Lgals5	chr10:66225995-66229311	-	protein_coding	1.31288	2.48437	0.00103361	0.00974193	5.27234	3.95946	15.6464	11.8111	16.6541	35.8932	36.3386	40.9079
ENSRNOG00000012574	Pum3	chr1:245476529-245514252	-	protein_coding	1.13171	2.19119	0.000822993	0.00863549	4.84215	3.71044	13.3258	12.1838	10.8769	30.1218	29.2261	24.0874
ENSRNOG00000012576	Vimp	chr1:126979575-126989344	+	protein_coding	0.949412	1.93109	0.000146432	0.00421193	5.45538	4.50597	21.0405	23.0402	21.1379	40.4187	46.0262	42.3672
ENSRNOG00000012630	Rhoc	chr2:207271853-207279314	+	protein_coding	1.90946	3.75667	0.000482918	0.00677903	7.09266	5.1832	36.5307	38.1626	31.6315	147.201	156.682	107.811
ENSRNOG00000012659	Vamp5	chr4:100231561-100232559	-	protein_coding	1.29926	2.46103	0.00511733	0.0227587	2.13469	0.83543	1.40796	0.523701	0.548527	3.19846	3.06977	3.95628
ENSRNOG00000012664	Polr1e	chr5:60572577-60588240	+	protein_coding	1.53108	2.89003	0.0244757	0.0608739	3.14793	1.61685	2.1348	2.13161	1.93886	14.5147	7.10952	4.53505
ENSRNOG00000012681	Lgals9	chr10:64737016-64760202	+	protein_coding	1.27507	2.42011	0.0133813	0.0406151	6.47051	5.19544	42.6427	34.9503	30.3569	60.7077	98.1744	112.95
ENSRNOG00000012683	Abhd17c	chr1:146248503-146289465	-	protein_coding	0.815582	1.76001	0.0054186	0.0235984	2.44825	1.63267	2.21934	1.59412	2.57018	4.37272	4.11587	4.91394
ENSRNOG00000012736	Sssca1	chr1:221087803-221089586	-	protein_coding	1.33561	2.52382	0.0198202	0.0526604	3.93185	2.59625	5.16657	6.14487	4.01887	20.6057	9.03967	15.3882
ENSRNOG00000012778	Magoh	chr5:127480485-127487603	+	protein_coding	0.743999	1.67481	0.0256699	0.0627952	6.31207	5.56807	58.415	35.0837	48.8038	76.2613	83.1329	76.1684
ENSRNOG00000012779	Msr1	chr16:56813791-56900052	-	protein_coding	0.754677	1.68725	0.021551	0.0557617	3.63361	2.87893	5.90477	8.40138	5.13184	11.2882	10.1546	12.9485
ENSRNOG00000012782	Tmem2	chr1:239398043-239474931	+	protein_coding	2.53209	5.78409	0.00150027	0.011732	6.52691	3.99482	14.1557	14.128	16.6736	59.4619	126.428	100.775
ENSRNOG00000012811	Spint1	chr3:111049118-111062011	+	protein_coding	1.18872	2.2795	0.00705734	0.0274911	6.23806	5.04934	27.1678	39.7599	30.6244	73.9901	92.1834	60.5436
ENSRNOG00000012818	Ksr1	chr10:66347358-66482150	-	protein_coding	0.711284	1.63726	0.0194994	0.0521479	3.16481	2.45353	4.49595	4.84766	4.11365	7.76412	6.31673	10.2482
ENSRNOG00000012828	Emg1	chr4:157222385-157230647	-	protein_coding	1.04028	2.05663	0.0134338	0.0406793	3.93828	2.898	7.33512	6.12848	5.97027	19.3203	14.2478	10.6275
ENSRNOG00000012853	Tk2	chr19:917203-939221	+	protein_coding	0.66839	1.5893	0.00665831	0.0265475	2.81692	2.14853	4.11126	3.15045	3.10855	6.8516	5.59848	5.75346
ENSRNOG00000012892	Abca4	chr2:225645568-225783287	+	protein_coding	2.25335	4.76788	0.00286576	0.0164331	2.65459	0.401246	0.335143	0.356682	0.271613	3.27529	4.9953	8.74005
ENSRNOG00000012927	Rrp9	chr8:115179893-115188588	+	protein_coding	1.78671	3.45027	0.000663826	0.00782399	4.95433	3.16762	8.0642	8.41046	7.50557	37.2454	30.4831	23.7484
ENSRNOG00000012929	Wsb1	chr10:66586924-66602987	-	protein_coding	1.65161	3.14184	0.0011231	0.0101702	6.74939	5.09778	42.0819	32.8236	26.5574	108.211	97.7287	114.504
ENSRNOG00000012946	Mov10	chr2:207278161-207300854	-	protein_coding	2.10444	4.30032	9.99063e-06	0.00250506	4.98817	2.88373	6.91817	6.03933	6.21296	31.8815	32.0768	28.3965
ENSRNOG00000012965	Themis2	chr5:150970909-150987081	-	protein_coding	2.11283	4.3254	0.00449952	0.0211569	4.78718	2.67435	6.96957	4.76059	4.66595	38.0735	29.0291	16.9403
ENSRNOG00000012994	Pus3	chr8:36766977-36769162	+	protein_coding	1.5826	2.99509	0.021274	0.055317	3.89059	2.30799	6.84332	2.66346	3.22603	9.36793	18.3163	15.2907
ENSRNOG00000013007	Il17c	chr19:55246926-55248205	+	protein_coding	3.45909	10.9974	1.60434e-05	0.00253197	3.52054	0.0614492	0.136303	0	0	10.3462	12.4232	8.92331
ENSRNOG00000013009	Ldha	chr1:102900286-102909707	+	protein_coding	0.639006	1.55726	0.000443007	0.00659431	7.22809	6.58909	90.4414	103.1	92.744	151.459	150.092	145.293
ENSRNOG00000013011	Dnajb4	chr2:257394818-257425242	-	protein_coding	0.862136	1.81773	0.0123578	0.0387411	5.14795	4.28582	17.1336	17.3818	21.2643	32.9323	28.488	43.5459
ENSRNOG00000013014	Cyba	chr19:55249616-55257876	-	protein_coding	0.981185	1.97409	0.000462092	0.00666471	7.27371	6.29253	84.959	78.5453	69.439	153.535	161.732	146.34
ENSRNOG00000013040	Ddx31	chr3:7422820-7488617	+	protein_coding	0.806072	1.74844	0.0164101	0.0463311	2.5092	1.70313	1.86052	2.58103	2.36997	5.2287	5.64069	3.4609
ENSRNOG00000013064	Lrp8	chr5:127404450-127476641	+	protein_coding	1.59256	3.01584	0.0291194	0.068337	2.36313	0.770576	0.760795	0.780495	0.583615	7.84743	4.42608	1.83674
ENSRNOG00000013090	Gadd45g	chr17:13391467-13393243	-	protein_coding	3.31044	9.92067	0.000453409	0.0066204	7.26835	3.95791	12.7681	19.9558	12.0069	116.763	201.555	152.611
ENSRNOG00000013135	Ptpn12	chr4:10631073-10702386	+	protein_coding	1.09741	2.13971	0.00378406	0.0190487	7.01252	5.91511	46.4716	66.2072	67.8695	131.328	134.624	118.936
ENSRNOG00000013169	Traf4	chr10:65418700-65424802	-	protein_coding	0.855921	1.80991	0.0180078	0.0493103	3.14842	2.2925	3.30422	4.16167	4.29235	10.1015	8.12585	5.88105
ENSRNOG00000013239	Tle4	chr1:231393379-231530786	-	protein_coding	0.998116	1.99739	0.000903809	0.00905408	4.1936	3.19549	8.29873	8.41202	7.78424	19.0971	18.3357	14.7655
ENSRNOG00000013267	Helz2	chr3:176731769-176744377	-	protein_coding	1.37308	2.59023	3.49947e-05	0.00285914	4.92612	3.55304	11.3802	10.646	10.2153	31.739	28.1758	28.4198
ENSRNOG00000013280	Olfm4	chr15:62406873-62429449	+	protein_coding	2.59826	6.05557	0.00896793	0.0318099	3.8184	1.22013	1.50304	1.14029	1.3602	23.4456	15.7286	5.86586
ENSRNOG00000013290	Nrip3	chr1:174385424-174411141	-	protein_coding	0.941951	1.92112	6.60151e-05	0.00339194	1.79221	0.850256	0.792586	0.819582	0.796414	2.2542	2.44597	2.70483
ENSRNOG00000013309	Pik3ap1	chr1:260527781-260638915	-	protein_coding	1.39437	2.62873	0.00573812	0.0243364	4.47695	3.08259	8.49293	7.55603	6.48479	17.5536	29.9983	18.2011
ENSRNOG00000013323	Rnf217	chr1:28301922-28390837	+	protein_coding	0.715481	1.64203	0.0108484	0.0356694	3.40979	2.69431	5.38729	5.26925	5.7713	11.3031	10.3298	7.61214
ENSRNOG00000013370	Gfer	chr10:14059347-14061703	-	protein_coding	1.66064	3.16156	0.000892039	0.00899648	5.05165	3.39101	9.88459	8.97638	9.63169	36.2015	37.114	24.7304
ENSRNOG00000013376	Mvd	chr19:55258905-55268951	-	protein_coding	1.15938	2.23362	0.000869781	0.00888691	3.16742	2.00804	3.35738	2.96157	2.77008	6.66892	8.81575	8.63411
ENSRNOG00000013380	Rhov	chr3:111078619-111087347	-	protein_coding	1.81825	3.52653	0.000477863	0.00675497	3.62722	1.80897	2.97704	2.73145	1.89882	11.5903	9.80438	12.8696
ENSRNOG00000013395	Pglyrp1	chr1:79790705-79796111	+	protein_coding	1.86324	3.63824	0.0165708	0.0466758	4.24271	2.37947	5.17565	3.4993	4.07048	25.2872	24.4459	9.14354
ENSRNOG00000013429	Tbl3	chr10:14066948-14072230	-	protein_coding	0.897922	1.86338	0.0227448	0.0577676	4.05026	3.15234	8.0305	8.73289	6.99636	21.7714	14.0441	12.2738
ENSRNOG00000013452	Rcn1	chr3:95406284-95418679	-	protein_coding	1.50253	2.83339	0.010433	0.0348706	7.37978	5.87725	52.8825	57.1542	63.812	108.588	233.19	179
ENSRNOG00000013526	Rassf4	chr4:148769096-148803988	-	protein_coding	2.4575	5.49266	0.00154454	0.0118974	5.23535	2.77785	5.30771	7.39776	5.08992	51.289	37.6344	25.4612
ENSRNOG00000013634	Myd88	chr8:128022473-128026841	-	protein_coding	1.52797	2.88379	0.00210618	0.0138913	5.88956	4.3616	20.698	20.5153	17.6101	77.6051	50.9862	49.988
ENSRNOG00000013654	Cbln2	chr18:83777665-83782930	+	protein_coding	1.07722	2.10997	0.00118405	0.0104743	1.29044	0.213223	0.156414	0	0.347245	1.33758	1.42865	1.57784
ENSRNOG00000013674	Megf10	chr18:52215682-52366238	+	protein_coding	0.894491	1.85895	0.000744943	0.00824483	1.11313	0.218638	0.190965	0.06398	0.243419	1.36513	1.1314	1.00787
ENSRNOG00000013714	Snrpd1	chr18:1866080-1876613	+	protein_coding	1.08932	2.12774	0.00153041	0.0118712	5.27718	4.18785	16.8146	17.0681	17.8071	38.1122	44.6453	31.663
ENSRNOG00000013719	Dph5	chr2:218834034-218866761	+	protein_coding	0.780773	1.71805	0.0260826	0.0634631	2.5204	1.73963	2.52694	1.54523	3.14873	4.1355	4.75477	5.39054
ENSRNOG00000013721	Nepro	chr11:60919453-60931794	-	protein_coding	1.13043	2.18924	0.00773155	0.0291069	3.51414	2.38371	4.45201	4.74664	3.53665	11.8498	7.62921	12.4499
ENSRNOG00000013743	Sec61a1	chr4:120453581-120467932	-	protein_coding	0.647623	1.56659	0.00146244	0.0115589	5.03518	4.38756	19.2194	22.3524	18.4204	30.9856	32.5273	31.8751
ENSRNOG00000013745	Ctrc	chr5:160394580-160405050	-	protein_coding	0.850613	1.80327	0.0256265	0.0627207	1.83723	0.98662	1.10184	1.05599	0.800469	3.63095	2.72445	1.64517
ENSRNOG00000013748	Trem3	chr9:14713935-14724093	-	protein_coding	1.65029	3.13897	0.00273633	0.0160332	3.76568	2.11538	3.78628	3.11181	3.13382	9.69377	17.7076	11.5775
ENSRNOG00000013791	Enpp3	chr1:21613148-21684480	+	protein_coding	1.45323	2.7382	0.0014146	0.0113466	4.24429	2.79107	5.15768	7.82984	5.0984	17.0917	17.342	19.5142
ENSRNOG00000013804	Exoc5	chr15:25887070-25933268	-	protein_coding	0.893984	1.8583	0.0288562	0.0679311	4.71113	3.81715	19.0585	10.5454	11.0927	25.7202	27.5327	22.5719
ENSRNOG00000013805	Tnip2	chr14:81488008-81504686	+	protein_coding	1.73567	3.33034	0.000828107	0.0086517	5.10078	3.36511	9.61124	9.82072	8.52735	43.238	29.2044	29.2409
ENSRNOG00000013820	Tnfrsf14	chr5:172328262-172335892	-	protein_coding	1.26746	2.40737	0.00717519	0.0277376	4.20145	2.93399	9.18348	4.63884	6.77269	18.2676	16.3568	17.6203
ENSRNOG00000013886	Fyb	chr2:55835151-55983804	+	protein_coding	1.46429	2.75927	0.00170342	0.0124299	4.58346	3.11917	8.11709	5.73653	9.68074	22.5733	23.4228	22.9365
ENSRNOG00000013895	Npdc1	chr3:2625015-2630670	+	protein_coding	0.593767	1.50918	0.0142834	0.0422013	6.12814	5.53437	52.5968	40.6586	43.5856	77.7177	62.0038	67.996
ENSRNOG00000013898	Cdca4	chr6:137396140-137421283	-	protein_coding	1.59177	3.01419	0.0312287	0.0719974	2.52444	0.932671	1.57944	0.004934	1.68301	5.76039	3.67512	5.02607
ENSRNOG00000013908	Bpifa5	chr3:149643481-149649398	+	protein_coding	1.76357	3.39537	0.00129636	0.0109629	3.83298	2.06941	4.40359	2.40507	3.01837	11.9038	15.2973	12.7622
ENSRNOG00000013912	Slc30a7	chr2:218888431-218951030	-	protein_coding	0.6733	1.59472	0.0116645	0.0374309	3.64584	2.97254	5.52913	7.77394	7.44153	10.9631	12.8673	10.8219
ENSRNOG00000013948	Zc3hav1	chr4:66011915-66062089	-	protein_coding	1.81778	3.52539	0.00536975	0.0234864	6.4604	4.64261	32.6658	27.5508	15.214	84.9244	97.9222	79.3361
ENSRNOG00000013959	Skor1	chr8:68030621-68038533	-	protein_coding	0.701326	1.626	0.0160411	0.0455993	0.715077	0.0137514	0.029008	0	0	1.0857	0.500379	0.413601
ENSRNOG00000013961	Ghitm	chr16:14371531-14382641	-	protein_coding	1.75098	3.36586	2.71559e-05	0.00268046	7.53259	5.78162	53.1561	57.1977	51.816	189.101	196.962	167.671
ENSRNOG00000013973	Lcn2	chr3:11414186-11417546	-	protein_coding	4.95581	31.0347	0.000276089	0.00531853	11.5866	6.63076	91.8439	125.418	81.911	4893.99	2946.02	2015.42
ENSRNOG00000013987	Sbno2	chr7:12471824-12518654	+	protein_coding	2.84959	7.20794	9.39833e-05	0.00369405	5.89572	3.04613	7.06572	7.13607	7.58759	68.9532	63.5945	45.7045
ENSRNOG00000014004	Ncoa7	chr1:29225707-29385199	+	protein_coding	1.40249	2.64357	0.000652642	0.00779376	4.56867	3.16619	7.0701	8.33328	8.60372	21.6013	27.0241	20.0989
ENSRNOG00000014048	Cyld	chr19:19265164-19315357	-	protein_coding	0.728586	1.65701	0.00792467	0.0295747	4.31039	3.5818	10.0601	11.5293	11.3881	15.6849	19.2574	22.1081
ENSRNOG00000014049	Riok1	chr17:27429416-27452314	-	protein_coding	0.790716	1.72993	0.00394503	0.0196079	3.93302	3.1423	8.18751	6.97901	8.38934	15.7681	15.183	12.1319
ENSRNOG00000014079	Stat1	chr9:54287541-54484533	-	protein_coding	1.27253	2.41585	0.0125559	0.0391269	5.82856	4.55603	23.2115	23.8946	20.5964	41.7021	50.4457	82.5445
ENSRNOG00000014097	Psmd7	chr19:39639432-39646718	-	protein_coding	1.51723	2.86241	0.0111097	0.0361243	6.15492	4.6377	23.7582	23.4422	24.4917	44.05	97.1269	80.8405
ENSRNOG00000014119	Farsb	chr9:84324442-84383687	-	protein_coding	0.718669	1.64566	0.000106593	0.0038093	4.58572	3.86705	13.2332	13.396	14.1617	22.1432	22.6877	24.2563
ENSRNOG00000014124	Nod2	chr19:19332594-19377492	-	protein_coding	1.72076	3.29611	0.00130939	0.0109684	2.76041	1.03965	1.51376	0.960925	0.762438	6.63406	6.41541	4.49555
ENSRNOG00000014127	Rnf151	chr10:14083538-14085855	-	protein_coding	0.75944	1.69283	0.00930965	0.0325576	1.11341	0.353968	0.315333	0.308217	0.213248	1.67812	1.02022	0.871878
ENSRNOG00000014142	Ogfrl1	chr9:29634179-29647903	-	protein_coding	0.903131	1.87012	0.000182756	0.00454329	5.51283	4.6097	23.3359	23.4629	23.4464	49.1437	42.3837	42.756
ENSRNOG00000014166	Smoc2	chr1:56242346-56374120	+	protein_coding	0.711828	1.63788	0.0265378	0.0642056	3.05976	2.34794	4.58702	5.14001	2.84635	7.55931	7.39578	7.06758
ENSRNOG00000014188	Tma16	chr16:24978527-24997006	+	protein_coding	1.3192	2.49527	0.00304327	0.0170196	1.768	0.448802	0.519776	0.31531	0.27204	3.22576	2.48614	1.68172
ENSRNOG00000014201	Manf	chr8:115623178-115626380	-	protein_coding	1.67031	3.18283	0.0122101	0.0385105	6.50727	4.83696	30.0458	26.3122	26.533	57.7195	86.8805	144.874
ENSRNOG00000014305	Fbxo42	chr5:159670662-159729064	+	protein_coding	0.616172	1.5328	0.000834864	0.00868999	3.51719	2.90102	6.78602	6.00852	6.63728	11.097	10.5493	9.74255
ENSRNOG00000014320	Inhba	chr17:51898217-51912496	-	protein_coding	1.66067	3.16163	4.9262e-05	0.00312846	1.85275	0.192081	0.063131	0.153737	0.21555	2.87348	2.69311	2.29387
ENSRNOG00000014350	Cyr61	chr2:251529354-251532312	-	protein_coding	2.09141	4.26165	0.0362791	0.0802816	6.72717	4.63575	32.3786	19.1703	21.8204	50.5593	96.2345	236.197
ENSRNOG00000014361	Edn1	chr17:22137324-22143324	-	protein_coding	1.09771	2.14015	0.00700044	0.0273823	4.92915	3.83144	12.1471	10.7783	17.6304	30.925	26.2282	31.5327
ENSRNOG00000014378	Il1r2	chr9:46840992-46881264	+	protein_coding	4.76075	27.11	1.98207e-05	0.00253197	5.84613	1.08538	1.70153	1.13115	0.65948	56.9489	55.3076	57.3407
ENSRNOG00000014426	Lox	chr18:47500330-47577819	-	protein_coding	1.80101	3.48463	0.00114911	0.0103349	5.15057	3.34957	7.84253	8.31885	11.8536	28.4415	38.7843	37.2614
ENSRNOG00000014448	Arntl	chr1:178039063-178137465	+	protein_coding	1.85343	3.61358	0.00604178	0.0250846	3.61755	1.76412	2.02288	2.54625	2.65568	6.71572	15.4207	13.595
ENSRNOG00000014460	Hivep1	chr17:22278798-22311392	-	protein_coding	0.932376	1.90842	8.60158e-05	0.00363468	4.04477	3.1124	7.60407	7.5412	7.80137	15.5461	16.6344	14.4077
ENSRNOG00000014478	Fndc3a	chr15:54381044-54528480	-	protein_coding	0.619668	1.53652	0.00716564	0.0277154	4.84635	4.22668	16.0446	18.0475	19.2137	29.9387	29.6759	24.0835
ENSRNOG00000014504	Il1r1	chr9:46962288-47036670	+	protein_coding	0.857153	1.81146	0.00161669	0.0121219	4.15171	3.29456	8.28947	9.85337	8.36976	14.7927	17.5559	18.1616
ENSRNOG00000014518	Adam28	chr15:50358192-50425900	-	protein_coding	1.39078	2.6222	0.00465367	0.0215674	2.4393	1.04852	1.16117	0.794006	1.28244	3.17129	4.41063	6.06956
ENSRNOG00000014532	Lbp	chr3:154786215-154813464	+	protein_coding	1.50096	2.83031	0.013767	0.0412767	5.54433	4.04337	10.1968	23.5185	15.3281	55.9625	39.811	42.7182
ENSRNOG00000014634	Gtpbp1	chr7:120923274-120947723	+	protein_coding	1.13583	2.19744	0.000538924	0.0071186	4.78033	3.6445	10.8153	12.5266	11.2371	30.0291	26.1046	23.6747
ENSRNOG00000014668	RGD621098	chr19:37179814-37215404	+	protein_coding	0.922531	1.89544	0.000959564	0.00933339	4.69152	3.76899	11.8234	14.2222	11.9795	26.4013	22.473	25.824
ENSRNOG00000014692	Mogat1	chr9:84405477-84418591	+	protein_coding	0.720202	1.64741	0.0412818	0.088562	0.931589	0.211387	0.174806	0.137306	0.161604	1.4475	1.04648	0.385411
ENSRNOG00000014762	Ppie	chr5:140822141-140834959	-	protein_coding	0.746686	1.67793	0.0151393	0.0438587	4.67593	3.92925	12.2839	16.5609	14.1563	29.9312	23.1847	21.3281
ENSRNOG00000014791	Peg3	chr1:70222964-70237443	+	protein_coding	0.844362	1.79547	0.00176703	0.0126746	1.21746	0.373096	0.250224	0.318093	0.318274	1.35573	1.02299	1.63849
ENSRNOG00000014828	Avpi1	chr1:261365590-261371508	-	protein_coding	1.41313	2.66314	0.00650345	0.026243	7.98471	6.57158	109.162	100.566	75.9038	287.52	301.026	185.504
ENSRNOG00000014829	Prmt3	chr1:105113595-105200470	+	protein_coding	1.65818	3.15617	0.000595647	0.00743562	3.76144	2.10327	4.13245	2.69645	3.18148	14.0258	12.8727	10.9653
ENSRNOG00000014832	Mapkapk3	chr8:116012121-116045954	-	protein_coding	1.68622	3.21813	0.0082006	0.0301241	5.29791	3.61169	11.7804	10.7677	11.1463	54.3585	43.2605	23.8481
ENSRNOG00000014838	Glipr2	chr5:59416076-59446647	+	protein_coding	2.61515	6.12687	3.07326e-06	0.00212831	5.38825	2.7731	5.58324	6.27944	5.66528	37.9477	41.9751	42.8906
ENSRNOG00000014856	Etnk1	chr4:177402904-177447028	+	protein_coding	1.23502	2.35385	0.000863037	0.00886395	6.44115	5.20613	37.7747	34.1449	35.9139	97.226	90.9011	71.6756
ENSRNOG00000014900	Crem	chr17:57031766-57090888	+	protein_coding	2.14499	4.4229	0.00570459	0.0242479	3.75778	1.61279	3.02769	1.79611	1.5403	19.1464	12.8482	7.87211
ENSRNOG00000014936	Ifitm2	chr1:213750192-213751405	-	protein_coding	1.23149	2.3481	0.00465154	0.0215674	8.47182	7.24033	167.132	159.707	126.933	445.064	291.182	342.372
ENSRNOG00000014956	Slc11a1	chr9:81655629-81666706	+	protein_coding	1.20788	2.30998	0.0281987	0.0668885	4.59392	3.38604	11.5847	12.8003	5.57912	23.5314	19.613	26.8523
ENSRNOG00000014963	Adgrg1	chr19:10423501-10460674	-	protein_coding	1.9872	3.96468	0.00133788	0.0110991	4.6883	2.70109	5.11156	5.91972	5.50265	17.6854	26.7189	32.0885
ENSRNOG00000014964	Hp	chr19:42097995-42100804	+	protein_coding	2.77236	6.83225	0.0167296	0.0469508	5.60024	2.82788	2.61495	4.57438	16.7636	38.9184	50.3225	54.7235
ENSRNOG00000015020	Idh1	chr9:71882105-71900044	-	protein_coding	0.954165	1.93746	0.0478335	0.0983796	6.24406	5.2899	44.1624	52.1695	23.9352	72.2642	81.9505	70.6538
ENSRNOG00000015078	Ifitm3	chr1:213810696-213811901	-	protein_coding	2.14044	4.40896	0.00345844	0.0182564	10.1808	8.04039	169.615	365.603	290.73	1029.59	1342.08	1128.84
ENSRNOG00000015121	N4bp1	chr19:21218465-21266964	+	protein_coding	0.986896	1.98192	0.00178389	0.0127422	4.53763	3.55074	9.7696	10.6675	11.8073	23.7359	24.4555	18.8966
ENSRNOG00000015160	Gem	chr5:25349928-25353661	+	protein_coding	3.55184	11.7277	0.0029631	0.0167764	5.00844	1.4566	1.07911	1.19121	3.53815	53.2838	29.3486	19.2426
ENSRNOG00000015217	Ltv1	chr1:7323040-7335936	-	protein_coding	0.66706	1.58783	0.00213342	0.0139518	4.68508	4.01802	15.5979	15.536	14.4934	26.6955	26.006	21.7602
ENSRNOG00000015236	Mybbp1a	chr10:59000397-59010903	+	protein_coding	1.00142	2.00197	4.32835e-05	0.00312011	5.0624	4.06098	15.4186	15.3033	16.3708	34.2248	30.7435	32.3655
ENSRNOG00000015239	Ginm1	chr1:1870388-1885981	-	protein_coding	0.817487	1.76233	0.0122289	0.0385476	6.15142	5.33394	40.7883	45.7806	32.5664	58.7567	76.5029	76.5507
ENSRNOG00000015321	Moxd1	chr1:22124495-22206505	-	protein_coding	1.33553	2.52369	0.00261587	0.0156747	3.98625	2.65071	4.05904	5.43062	6.61219	16.5854	15.3968	12.8047
ENSRNOG00000015329	Kpna2	chr10:95200030-95212111	-	protein_coding	0.925192	1.89894	0.000257004	0.00518392	5.32384	4.39865	18.1693	21.7217	20.544	40.005	39.2513	37.9305
ENSRNOG00000015340	Dnajc25	chr5:76150840-76171423	+	protein_coding	1.13596	2.19765	0.00117836	0.0104493	3.60631	2.47034	5.31807	4.34119	4.04336	12.4806	11.4993	9.72076
ENSRNOG00000015346	Obsl1	chr9:82680384-82699551	-	protein_coding	1.29521	2.45413	0.0171337	0.0477323	4.20763	2.91242	5.61142	7.86047	6.28493	27.216	13.8543	14.0496
ENSRNOG00000015366	Neurl3	chr9:42831742-42839837	-	protein_coding	3.81271	14.052	0.000201413	0.00471567	6.13584	2.32314	4.23379	4.30565	3.51281	94.0345	47.6219	74.2501
ENSRNOG00000015382	Arid5a	chr9:42871950-42884855	+	protein_coding	2.18366	4.54305	0.00212914	0.0139415	4.59901	2.41535	3.65123	5.44361	4.065	33.5779	21.9115	16.9666
ENSRNOG00000015415	Rhoq	chr6:10533151-10568581	+	protein_coding	1.02543	2.03556	0.0348869	0.0778877	2.8812	1.85577	2.15955	4.4213	1.76823	7.45996	6.69598	5.14258
ENSRNOG00000015416	Nabp1	chr9:55050203-55057658	+	protein_coding	2.36225	5.14171	0.000643865	0.00775365	4.92807	2.56582	6.89269	3.65641	4.64793	25.8852	29.5562	33.346
ENSRNOG00000015430	Nlgn2	chr10:56431573-56444847	-	protein_coding	1.16591	2.24375	0.00794447	0.0295944	3.07539	1.90948	2.54587	2.67622	3.06734	10.5469	5.9122	6.50369
ENSRNOG00000015441	Il4r	chr1:196942364-196967220	+	protein_coding	2.0342	4.09596	7.82301e-06	0.00244591	7.73117	5.69697	51.2426	48.8313	52.6231	216.126	224.757	194.7
ENSRNOG00000015449	Tmem171	chr2:28791875-28801223	-	protein_coding	3.7773	13.7113	0.000780997	0.0084321	4.17635	0.399056	0.497621	0.324194	0.156192	21.3345	24.26	9.47645
ENSRNOG00000015468	Bpifb1	chr3:149668102-149702399	+	protein_coding	2.34187	5.06959	0.00521857	0.023033	4.0932	1.75133	2.78191	1.66031	2.79281	13.5797	27.8201	10.8326
ENSRNOG00000015491	Rcl1	chr1:247228061-247305693	+	protein_coding	2.90967	7.51447	1.98477e-05	0.00253197	5.18414	2.27447	4.04095	3.93623	3.55135	34.4159	31.1043	41.2652
ENSRNOG00000015495	Slc25a37	chr15:51128268-51168384	-	protein_coding	1.31207	2.48298	0.001876	0.0130727	4.25955	2.94747	8.67472	6.01637	5.7621	18.9758	16.3053	19.3268
ENSRNOG00000015508	RGD1307235	chr13:25656983-25752792	+	protein_coding	0.700955	1.62558	0.0162577	0.0459813	4.28906	3.58811	10.956	10.9962	11.127	22.6661	19.2449	14.5943
ENSRNOG00000015514	Bcat1	chr4:179259308-179339795	-	protein_coding	2.65625	6.30393	0.0122179	0.0385265	4.53709	1.88084	2.55278	3.46156	2.15147	19.5449	48.9347	11.1982
ENSRNOG00000015523	RGD1308147	chr17:53080638-53087274	-	protein_coding	1.38984	2.62049	0.00897365	0.0318134	2.49486	1.10502	0.839927	2.12725	0.729706	4.40784	4.06797	5.53468
ENSRNOG00000015544	LOC100909441	chr2:199199845-199203637	+	protein_coding	0.968083	1.95624	0.00993105	0.0337868	4.36789	3.3998	9.42901	10.6927	8.64211	25.6706	18.4878	15.9356
ENSRNOG00000015568	Plpp5	chr16:71121175-71125316	-	protein_coding	0.970722	1.95982	0.00366695	0.0187052	4.89179	3.92107	16.9662	12.6354	13.1891	31.5561	24.9295	29.9957
ENSRNOG00000015589	Smyd5	chr4:117215064-117229873	+	protein_coding	1.22225	2.3331	0.0147955	0.0432243	2.51729	1.29504	1.63218	1.36772	1.3708	5.90467	6.12694	2.81325
ENSRNOG00000015591	Cndp2	chr18:81521968-81539065	-	protein_coding	1.33457	2.52201	0.00030025	0.0055143	7.85577	6.52119	92.9258	99.3469	81.2117	212.33	227.104	254.435
ENSRNOG00000015615	Tnfrsf11a	chr13:25778317-25835957	+	protein_coding	2.91347	7.5343	0.000479482	0.00675497	5.13921	2.22574	3.67671	3.24791	4.15141	44.9974	37.5959	23.6545
ENSRNOG00000015622	Fbxo4	chr2:53797954-53811134	-	protein_coding	1.28687	2.43998	0.00132702	0.0110469	4.10155	2.81468	5.59753	7.51497	5.19936	16.9637	17.3016	14.3882
ENSRNOG00000015632	Taf1c	chr19:52246068-52252587	-	protein_coding	1.39246	2.62526	0.00392051	0.019526	3.35116	1.9587	3.5034	2.62803	2.59476	12.5698	7.59369	8.11261
ENSRNOG00000015642	Pabpc4	chr5:140979435-140994732	+	protein_coding	0.590477	1.50574	0.0241307	0.0602771	5.25793	4.66745	25.4489	22.8768	24.9865	46.5303	34.8898	31.8431
ENSRNOG00000015644	Ugcg	chr5:76386836-76419560	+	protein_coding	2.56782	5.92911	0.000292198	0.005455	5.80713	3.23931	8.23602	7.3877	9.87085	47.1391	71.5325	49.2725
ENSRNOG00000015668	Ccl19	chr5:58181026-58183017	-	protein_coding	4.2469	18.9864	0.000102928	0.0038093	5.45047	1.20357	1.66412	1.44958	0.871923	46.397	31.2173	53.7548
ENSRNOG00000015682	Kel	chr4:70979504-70996395	-	protein_coding	0.6574	1.57724	0.046094	0.0959902	1.62737	0.969974	1.14367	0.844707	0.900588	2.29764	1.30917	2.87263
ENSRNOG00000015751	Cyp4f18	chr16:19410810-19528999	+	protein_coding	0.71438	1.64078	0.0328905	0.0747151	1.54581	0.831427	0.655545	1.11698	0.607667	2.07146	1.29152	2.53617
ENSRNOG00000015780	Rcn2	chr8:60709851-60726936	+	protein_coding	1.39567	2.63111	0.0350723	0.0782056	6.40597	5.0103	22.7767	49.72	26.7601	84.408	119.455	58.271
ENSRNOG00000015812	Tm4sf1	chr2:147382866-147392062	-	protein_coding	1.18916	2.28019	0.00252049	0.0153777	4.29089	3.10174	6.6576	8.6599	7.55226	15.5006	18.3461	22.4946
ENSRNOG00000015848	Lyrm5	chr4:179481263-179481603	+	protein_coding	0.950677	1.93278	0.00450497	0.0211683	1.72701	0.776337	0.525765	1.03619	0.617321	1.95029	2.24485	2.78956
ENSRNOG00000015913	Tspan5	chr2:244058186-244224058	+	protein_coding	1.15531	2.22732	0.00169495	0.0124201	3.75102	2.59571	4.25485	5.22754	5.74969	14.6975	11.6653	11.2763
ENSRNOG00000015936	Gng5	chr2:252359976-252368473	+	protein_coding	0.684891	1.60758	0.00829668	0.0302858	6.4328	5.74791	62.4895	48.9672	47.9205	80.5962	94.5742	81.677
ENSRNOG00000015948	Slc1a5	chr1:78710539-78724794	+	protein_coding	1.45346	2.73865	0.00691222	0.0271903	4.75713	3.30367	8.76876	7.03722	11.2621	35.8301	21.9097	22.4366
ENSRNOG00000015957	F13a1	chr17:28504623-28680362	+	protein_coding	1.28417	2.43541	0.0025252	0.0153804	3.269	1.98483	2.54419	2.64604	3.79892	8.29554	10.4357	7.42679
ENSRNOG00000015969	Rpf1	chr2:252368329-252382955	-	protein_coding	0.599378	1.51506	0.00214532	0.013997	4.81325	4.21387	18.4859	15.6021	18.7526	28.1791	26.8345	26.3619
ENSRNOG00000015992	Ccl20	chr9:88918433-88921001	+	protein_coding	4.79465	27.7546	0.000100786	0.00379852	5.38729	0.592637	0.407138	0.419794	0.716495	56.307	43.8336	27.5363
ENSRNOG00000016012	Spats2l	chr9:64643281-64843960	+	protein_coding	1.32549	2.50618	0.00900291	0.0318873	3.57607	2.25058	5.21504	2.47932	3.98355	10.9418	9.12091	13.0354
ENSRNOG00000016043	Aqp4	chr18:6765945-6782996	-	protein_coding	2.31566	4.97831	0.00234307	0.014713	4.52809	2.21244	3.32407	3.74862	3.84808	15.0065	34.3502	20.7064
ENSRNOG00000016044	Mab21l3	chr2:204231685-204254699	-	protein_coding	2.47784	5.57064	0.00346346	0.0182564	2.62747	0.149631	0.075443	0.157305	0.096718	9.70808	3.95267	3.44932
ENSRNOG00000016112	Cd274	chr1:247519939-247537943	+	protein_coding	4.32399	20.0287	1.50581e-05	0.00253197	6.19111	1.86712	3.22159	2.54586	2.24323	66.3972	86.6466	65.0321
ENSRNOG00000016123	Rnf144b	chr17:17817100-17947777	-	protein_coding	0.626581	1.5439	0.0223971	0.0572032	4.07965	3.45307	11.4428	9.7088	8.85767	15.6984	19.1833	13.3425
ENSRNOG00000016136	Pdcd1lg2	chr1:247562202-247627193	+	protein_coding	0.647684	1.56665	0.0010669	0.00991429	0.747469	0.0997856	0.051838	0.091522	0.07185	0.803976	0.728246	0.517734
ENSRNOG00000016150	Ifrd2	chr8:116343096-116348314	+	protein_coding	0.722463	1.65	0.0169561	0.0473578	3.81617	3.09371	9.12437	7.10792	6.57912	15.4432	10.9524	13.2201
ENSRNOG00000016163	Slc1a3	chr2:57860834-57935363	-	protein_coding	2.32586	5.01365	7.02038e-05	0.00339194	6.23198	3.90612	15.7487	14.3406	12.1147	76.8033	65.608	80.9442
ENSRNOG00000016217	Gtpbp4	chr17:63110254-63145577	-	protein_coding	0.975825	1.96677	0.000631991	0.00766656	4.24164	3.26581	8.23709	8.67919	8.95287	20.2184	17.9148	15.8681
ENSRNOG00000016234	Ciapin1	chr19:10596960-10610049	+	protein_coding	1.08068	2.11504	0.00606213	0.0251459	4.56056	3.47987	13.2268	7.87482	9.99951	23.2414	23.6839	20.9595
ENSRNOG00000016254	Sema4c	chr9:43129415-43139870	-	protein_coding	1.768	3.40581	0.00473206	0.0217573	4.29278	2.52478	4.82672	4.64321	4.79638	27.21	18.9418	12.3845
ENSRNOG00000016266	Mphosph10	chr1:125212849-125229052	-	protein_coding	0.660762	1.58092	0.000529816	0.00703663	4.60709	3.94633	13.96	14.6126	14.685	24.6875	24.1522	21.4038
ENSRNOG00000016273	Fam136a	chr4:118160147-118166062	+	protein_coding	0.593573	1.50898	0.0204767	0.0539288	1.49569	0.902118	0.668924	0.829445	1.13766	2.26448	1.4425	1.81252
ENSRNOG00000016278	Ccl17	chr19:10619220-10620671	-	protein_coding	1.46057	2.75217	0.0160601	0.0456319	2.99519	1.53462	1.92572	3.37538	0.899564	7.86917	5.87373	7.31482
ENSRNOG00000016326	Cx3cl1	chr19:10644244-10653800	-	protein_coding	6.43222	86.3559	0.00185677	0.01301	7.85148	1.41926	0.31376	0.868548	6.79284	308.532	296.974	132.569
ENSRNOG00000016378	Map3k8	chr17:56109549-56129919	+	protein_coding	2.29612	4.91133	1.98109e-05	0.00253197	5.64287	3.34675	9.90367	8.92982	8.72537	46.5589	55.116	45.7412
ENSRNOG00000016379	Jtb	chr2:189591780-189596421	+	protein_coding	1.18845	2.27908	0.00588795	0.0247278	5.16177	3.97331	16.7611	13.5706	13.973	45.8018	32.7692	28.0239
ENSRNOG00000016390	Eef1e1	chr17:26785029-26797161	+	protein_coding	1.05905	2.08356	0.00460708	0.0214975	4.30082	3.24177	8.55132	8.30469	8.52454	23.6275	18.6638	14.8102
ENSRNOG00000016394	Wdr77	chr2:208420309-208587260	+	protein_coding	1.68123	3.20701	0.00872795	0.0312868	4.04607	2.36484	2.40206	5.84668	4.86737	17.917	17.3012	12.0206
ENSRNOG00000016403	Olah	chr17:78879058-78903967	+	protein_coding	2.84267	7.17348	0.0109776	0.035892	3.95964	1.11697	0.659467	1.97855	1.0642	20.8366	23.8442	5.94233
ENSRNOG00000016411	Rps12	chr1:22758212-22760370	+	protein_coding	0.682772	1.60522	0.00803667	0.0297964	9.6456	8.96283	510.757	503.172	480.501	925.457	826.393	669.359
ENSRNOG00000016413	Pstpip1	chr8:60760078-60799361	+	protein_coding	1.62984	3.09478	0.00210863	0.0139011	4.35532	2.72549	6.55928	4.7332	5.67549	25.8724	16.1255	17.6338
ENSRNOG00000016432	LOC56764	chr2:252500146-252505971	-	protein_coding	0.720374	1.64761	0.0121832	0.0384923	1.32626	0.605881	0.584273	0.592283	0.397381	1.02616	1.80541	1.77369
ENSRNOG00000016459	Eif3j	chr3:113976687-113998922	+	protein_coding	0.766645	1.70131	0.00343881	0.0182254	5.58417	4.81753	28.8104	26.082	26.7722	55.1081	44.8913	41.8799
ENSRNOG00000016467	Kctd1	chr18:6374778-6474990	-	protein_coding	0.836009	1.78511	0.0108717	0.0357061	2.53917	1.70316	2.49267	1.87373	2.43959	4.89192	6.01543	3.75105
ENSRNOG00000016478	Eif5a	chr10:56527085-56531483	-	protein_coding	1.19293	2.28617	0.000498525	0.00683967	7.59217	6.39924	90.3664	84.7296	75.7669	211.298	195.993	170.799
ENSRNOG00000016486	Nop58	chr9:66495832-66519788	+	protein_coding	1.54902	2.92618	0.000791459	0.00849017	5.98323	4.43421	21.4594	20.4544	19.969	75.3055	63.7554	50.2347
ENSRNOG00000016535	Ccl22	chr19:10674189-10681145	-	protein_coding	1.66719	3.17596	0.000297843	0.0055143	2.01461	0.34742	0.469695	0.144196	0.224683	3.27535	2.55883	3.33609
ENSRNOG00000016541	Enc1	chr2:28049217-28061029	+	protein_coding	1.23737	2.35768	0.00296544	0.0167764	3.57239	2.33502	2.91698	5.12136	4.35715	10.7647	10.7415	11.1867
ENSRNOG00000016547	Rgs19	chr3:177196687-177201525	-	protein_coding	0.699521	1.62397	0.0395977	0.0857958	3.52148	2.82196	6.3737	7.33199	4.75502	10.9768	8.18245	12.7693
ENSRNOG00000016575	Tnfrsf1b	chr5:163136390-163167299	-	protein_coding	1.35527	2.55846	0.000613644	0.00755034	4.02709	2.67182	5.59965	5.20097	5.3228	18.571	14.4988	13.2861
ENSRNOG00000016581	Serpinb1a	chr17:32904119-32911495	+	protein_coding	2.6074	6.09403	0.00438397	0.0208131	7.50824	4.90084	25.3657	32.4062	29.2716	220.394	270.663	99.3272
ENSRNOG00000016587	Ninj1	chr17:15866237-15881327	-	protein_coding	1.38169	2.60573	0.00113075	0.0102139	4.50703	3.12534	9.63127	7.31559	6.51605	22.3937	23.398	19.5969
ENSRNOG00000016645	Sfmbt1	chr16:6779281-6895299	+	protein_coding	0.85075	1.80344	0.00289187	0.0165251	3.95035	3.0996	8.69203	6.91432	7.21093	16.2334	12.7235	14.6203
ENSRNOG00000016686	Tmem167a	chr2:18937458-18943561	+	protein_coding	1.03841	2.05396	0.00396614	0.0196277	3.69425	2.65583	4.65252	5.37851	5.94219	9.5937	14.0988	12.5595
ENSRNOG00000016698	Rnmt	chr18:64084795-64108246	+	protein_coding	0.623981	1.54112	0.00474362	0.021792	4.36454	3.74056	12.1489	12.9769	11.9946	21.7136	20.5366	16.8695
ENSRNOG00000016751	Slc25a28	chr1:263420061-263431290	-	protein_coding	2.45218	5.47241	0.000188106	0.00458065	6.27433	3.82215	13.864	11.6457	14.0546	92.7946	77.5749	61.9249
ENSRNOG00000016754	Bcs1l	chr9:81868265-81872197	+	protein_coding	1.1736	2.25574	0.00769677	0.0290361	2.85697	1.68336	2.98368	1.84753	1.92062	8.06098	6.09083	4.91869
ENSRNOG00000016776	Extl1	chr5:152573758-152589719	-	protein_coding	0.755515	1.68823	0.00111232	0.0101403	1.68103	0.925517	0.832271	0.770555	1.11216	2.01552	2.34755	2.26613
ENSRNOG00000016794	Phyhd1	chr3:8832740-8846125	+	protein_coding	1.51475	2.85749	0.00367911	0.0187377	5.26974	3.75499	15.0381	14.9058	8.64692	36.0295	36.2126	40.6689
ENSRNOG00000016825	Cd3eap	chr1:80267725-80271001	-	protein_coding	2.19266	4.57147	0.00990402	0.0337655	3.72503	1.53237	3.39888	0.575722	2.49181	14.8801	12.328	9.925
ENSRNOG00000016852	Apobec3b	chr7:121109241-121128542	+	protein_coding	1.38044	2.60349	0.0014358	0.0114559	3.23397	1.85352	2.14399	3.16724	2.60219	9.38397	9.22762	6.84196
ENSRNOG00000016853	Dsg1	chr18:12008759-12038053	+	protein_coding	0.99712	1.99601	0.00112254	0.0101702	1.42364	0.426523	0.284637	0.3954	0.354284	1.33828	1.68443	2.0756
ENSRNOG00000016926	Plekhs1	chr1:277261681-277291370	+	protein_coding	1.18523	2.27399	0.00201437	0.013587	1.27889	0.0936589	0.032971	0.087318	0.081777	1.02594	1.99279	1.35639
ENSRNOG00000016945	Pla2g2a	chr5:157282669-157285328	+	protein_coding	3.44201	10.868	0.00910943	0.0321351	6.94729	3.50528	8.20935	10.3463	13.012	246.788	157.034	46.9952
ENSRNOG00000016987	Pstpip2	chr18:74174936-74292921	+	protein_coding	1.60683	3.04583	0.00261957	0.01568	4.605	2.99817	4.73945	8.08241	8.78462	23.3054	23.1285	23.5753
ENSRNOG00000017123	B2m	chr3:114087287-114093309	+	protein_coding	1.18687	2.27658	0.000471861	0.00671078	9.33102	8.14416	289.172	270.303	286.604	562.275	731.174	646.765
ENSRNOG00000017129	Ttll4	chr9:81940630-81954686	+	protein_coding	1.22738	2.34142	0.00704459	0.0274742	4.045	2.81762	5.6974	5.98211	6.4932	20.1812	16.5253	11.1167
ENSRNOG00000017130	Rhd	chr5:153197459-153232687	+	protein_coding	0.63942	1.5577	0.0146987	0.0430454	1.98221	1.34279	2.00481	1.41959	1.2444	2.61757	2.8198	3.46329
ENSRNOG00000017163	Pfkp	chr17:68511064-68559471	-	protein_coding	2.0321	4.09	0.000263672	0.00523135	5.80445	3.77235	12.6242	14.9828	10.7168	49.3658	63.424	52.7973
ENSRNOG00000017188	Cyp27a1	chr9:81968332-81998169	+	protein_coding	2.28503	4.87375	0.000568954	0.00728367	5.84936	3.56433	11.6564	10.8207	10.0651	73.6897	57.5461	42.8269
ENSRNOG00000017191	Trim5	chr1:169446805-169534896	-	protein_coding	1.39056	2.6218	2.66179e-07	0.00129035	5.75737	4.36681	19.423	19.9649	19.5123	53.4361	53.956	51.9079
ENSRNOG00000017209	Tubb3	chr19:56220755-56229813	+	protein_coding	1.31016	2.4797	6.46153e-06	0.00244591	1.52087	0.210709	0.095051	0.192925	0.186428	1.83924	1.84502	1.92547
ENSRNOG00000017220	Tcirg1	chr1:219127602-219139464	-	protein_coding	1.17136	2.25223	0.000900078	0.00904032	5.22288	4.05153	17.6312	14.7528	14.5344	41.7411	35.2211	32.6454
ENSRNOG00000017231	Adam9	chr16:71810377-71887926	+	protein_coding	0.636448	1.5545	0.0236937	0.0594932	5.91363	5.27718	31.4264	36.7296	46.6642	57.7352	65.7954	54.8338
ENSRNOG00000017273	RGD1563917	chr9:92753957-92775816	-	protein_coding	1.09054	2.12953	0.00375117	0.0189766	2.11048	1.01994	1.32624	0.907466	0.879262	4.2526	3.1635	2.68228
ENSRNOG00000017277	Igsf6	chr1:190997029-191007503	-	protein_coding	0.930698	1.9062	0.000146617	0.00421193	4.24467	3.31398	9.74764	8.18104	8.96813	18.1248	17.9263	17.8218
ENSRNOG00000017283	Kcnt1	chr3:3310954-3365340	+	protein_coding	1.33017	2.51432	0.00412797	0.0200997	2.00689	0.676717	0.802229	0.71957	0.317974	4.11049	2.70471	2.42913
ENSRNOG00000017284	Nop16	chr17:10559680-10564733	+	protein_coding	1.01474	2.02054	0.000125438	0.00395851	5.77788	4.76313	27.3283	26.2941	24.8968	55.7349	56.4875	49.6428
ENSRNOG00000017325	Cldn7	chr10:56576428-56578626	+	protein_coding	1.3708	2.58613	0.00594071	0.0248483	5.91393	4.54313	23.1317	25.3909	18.8982	68.1707	70.9364	43.0492
ENSRNOG00000017340	Wdr12	chr9:66851940-66877972	-	protein_coding	1.00546	2.00759	0.00536843	0.0234864	4.54352	3.53806	10.733	10.5294	10.5869	28.8502	18.5907	20.6876
ENSRNOG00000017395	Duox2	chr3:114218193-114235933	-	protein_coding	2.92632	7.60169	0.00390516	0.0194896	3.00511	0.0787865	0.097944	0.027648	0.044063	5.35953	14.628	4.20659
ENSRNOG00000017414	Irf7	chr1:214248837-214252456	-	protein_coding	3.02634	8.14738	0.00013748	0.00411934	9.1079	6.08157	72.07	81.4108	50.5795	564.475	508.534	581.999
ENSRNOG00000017447	Eif2s2	chr3:150391460-150412179	-	protein_coding	1.30928	2.47818	0.000479811	0.00675497	7.07303	5.76375	54.7879	51.7977	53.4538	152.85	137.26	113.759
ENSRNOG00000017453	Ptpn2	chr18:63415306-63488027	-	protein_coding	1.5549	2.93814	0.00201704	0.013587	5.50831	3.95341	13.9965	15.0957	14.4022	56.6418	46.3629	33.5399
ENSRNOG00000017496	Cnp	chr10:88490798-88497356	+	protein_coding	1.14502	2.2115	0.0127278	0.0394417	4.16661	3.02158	5.82304	8.59683	7.17816	12.7412	22.6263	16.8401
ENSRNOG00000017523	H6pd	chr5:166998881-167030441	-	protein_coding	1.61636	3.06601	0.000119929	0.00389714	4.39573	2.77936	5.93614	5.42446	6.26208	17.668	22.4847	20.2743
ENSRNOG00000017539	Mmp9	chr3:161413298-161421520	+	protein_coding	3.70354	13.028	3.44792e-05	0.00285914	4.30474	0.601197	0.685672	0.235307	0.676436	18.7627	16.4065	21.4392
ENSRNOG00000017622	Npm3	chr1:265504575-265506046	-	protein_coding	1.70966	3.27083	4.53029e-05	0.00312011	4.3819	2.67224	5.60571	5.47043	5.05926	19.2325	22.2672	18.251
ENSRNOG00000017680	Dennd2d	chr2:209097927-209116965	+	protein_coding	1.51423	2.85647	0.00308725	0.0171678	4.42003	2.9058	4.7247	7.2461	7.91652	24.5513	19.4024	17.8186
ENSRNOG00000017686	Pi15	chr5:790833-819326	-	protein_coding	2.46896	5.53644	0.00284682	0.0163706	3.71149	1.24253	1.31928	1.66879	1.14016	10.8842	20.1866	7.9284
ENSRNOG00000017720	Mxd1	chr4:118449882-118472179	-	protein_coding	3.48428	11.1911	0.00601241	0.0249916	6.54666	3.06239	12.7608	2.50411	11.0889	88.4839	117.68	75.9311
ENSRNOG00000017762	Cdhr5	chr1:214255110-214263581	-	protein_coding	0.686923	1.60985	0.0297805	0.0695964	0.904774	0.217851	0.116156	0.202683	0.171826	1.27724	1.03045	0.419354
ENSRNOG00000017781	Dnajc7	chr10:88498238-88533829	-	protein_coding	0.656492	1.57625	0.00321732	0.0175438	6.09801	5.44152	42.4818	40.1868	44.8263	75.4554	67.8887	60.0232
ENSRNOG00000017783	Sfrp1	chr16:73372007-73410777	-	protein_coding	0.914987	1.88555	0.000450991	0.00660075	1.02128	0.106296	0.091055	0.115495	0.024898	1.18583	0.825971	1.09508
ENSRNOG00000017819	Cd14	chr18:29560365-29562153	-	protein_coding	3.6664	12.6968	0.000141923	0.00414456	7.35831	3.69191	10.9533	15.1874	10.1548	187.842	186.624	123.688
ENSRNOG00000017852	Nars	chr18:59986360-60002569	-	protein_coding	0.661701	1.58195	0.000211071	0.00473704	5.50083	4.83913	29.2754	27.847	25.852	44.8339	43.6515	44.3648
ENSRNOG00000017869	Irf8	chr19:54314865-54336640	+	protein_coding	2.03365	4.09439	0.00222305	0.01429	6.07171	4.03806	16.0244	16.2917	14.0599	48.9851	96.7371	61.287
ENSRNOG00000017873	Sct	chr1:214264754-214265668	-	protein_coding	1.32002	2.4967	0.0168983	0.0472328	2.47147	1.15144	1.45701	1.55079	0.748946	6.15828	5.35267	2.75139
ENSRNOG00000017876	Dnajc21	chr2:60419525-60446510	-	protein_coding	0.59664	1.51219	0.00205462	0.0136932	4.6434	4.04676	15.3516	15.3239	15.9126	26.1906	24.601	21.4252
ENSRNOG00000017941	Optn	chr17:77167740-77218389	+	protein_coding	0.731371	1.66022	0.00991014	0.0337655	5.2353	4.50393	21.8192	22.1237	21.136	42.5783	39.3072	29.4298
ENSRNOG00000017979	Mrto4	chr5:157815361-157820889	-	protein_coding	1.36079	2.56825	0.00266757	0.0158082	4.81792	3.45713	10.673	10.209	9.12391	35.3413	26.0102	21.8604
ENSRNOG00000017981	Mcm10	chr17:77224112-77246478	+	protein_coding	0.714984	1.64146	0.0130682	0.040024	1.34431	0.629324	0.616826	0.47064	0.556561	1.746	1.93393	1.03179
ENSRNOG00000018009	Rab8b	chr8:72638003-72714664	-	protein_coding	0.801231	1.74259	0.0213439	0.0553997	3.31247	2.51124	3.70934	5.57719	4.98236	9.63797	10.5899	6.95279
ENSRNOG00000018052	Cnksr3	chr1:43789791-43884267	-	protein_coding	0.728469	1.65688	0.00164821	0.0122159	2.65595	1.92748	2.704	2.90397	2.80634	6.04493	4.62242	5.32061
ENSRNOG00000018053	Fech	chr18:59941992-59975192	-	protein_coding	0.778079	1.71485	0.00422029	0.0203568	3.56958	2.7915	6.74102	5.0907	6.039	10.643	9.82131	12.2834
ENSRNOG00000018066	Bccip	chr1:205777130-205790175	+	protein_coding	0.851431	1.80429	0.0163119	0.0460898	4.59743	3.746	14.4752	14.3922	9.14006	25.1404	21.1597	23.4917
ENSRNOG00000018069	Ngdn	chr15:33677597-33684840	+	protein_coding	0.616615	1.53327	0.00404064	0.0198658	5.43381	4.8172	26.5273	28.7073	26.399	47.1911	42.8197	37.2458
ENSRNOG00000018081	Lactb	chr8:72750171-72766389	-	protein_coding	0.86219	1.8178	0.000137048	0.00411794	4.70241	3.84022	13.1903	14.4336	12.4156	24.8827	25.4881	24.7421
ENSRNOG00000018107	Zfand5	chr1:238843338-238852566	+	protein_coding	1.50426	2.83678	0.00212273	0.0139372	5.56141	4.05716	16.7183	16.2096	14.1282	60.9272	42.6529	37.955
ENSRNOG00000018109	Clic4	chr5:153568745-153625869	-	protein_coding	1.27833	2.42558	0.0442972	0.0933508	6.99909	5.72076	46.6498	57.3143	51.7871	80.281	113.087	224.73
ENSRNOG00000018118	Atad3a	chr5:173189592-173209768	-	protein_coding	1.39918	2.63752	0.00706562	0.0274911	3.76353	2.36435	4.91638	3.79948	3.80811	18.1084	11.4714	9.51164
ENSRNOG00000018126	Abca1	chr5:69857771-69983015	-	protein_coding	0.922716	1.89568	0.019598	0.0522866	5.45722	4.5345	20.3996	23.4285	22.8101	46.4126	54.818	31.0399
ENSRNOG00000018247	Dhx58	chr10:88599680-88611105	-	protein_coding	2.97161	7.84413	3.19345e-05	0.00279121	6.51707	3.54546	12.1778	10.9828	9.08022	86.3203	84.1182	102.363
ENSRNOG00000018257	Hpx	chr1:170423483-170431073	-	protein_coding	2.46385	5.51689	8.10252e-05	0.00362032	3.76548	1.30163	1.38478	1.68159	1.34232	14.0572	13.8549	10.2448
ENSRNOG00000018273	Ncl	chr9:93368932-93377643	-	protein_coding	0.821924	1.76776	0.00751137	0.0285881	7.872	7.05008	122.442	130.58	142.285	269.308	248.457	189.666
ENSRNOG00000018282	Gda	chr1:238982392-239057732	-	protein_coding	0.776911	1.71346	0.00159681	0.0120709	7.5432	6.76629	94.7359	117.82	112.399	191.049	175.957	189.947
ENSRNOG00000018322	Picalm	chr1:154377247-154458425	+	protein_coding	0.586386	1.50148	0.00944295	0.0328107	5.87362	5.28724	35.7377	37.3195	41.2979	54.2941	52.4577	67.19
ENSRNOG00000018343	Isca1	chr17:5281727-5294384	+	protein_coding	0.948419	1.92976	0.00984543	0.0336424	3.72511	2.77669	6.5013	5.35849	5.74701	15.1178	12.9964	9.2515
ENSRNOG00000018349	Polr1b	chr3:121632043-121656506	+	protein_coding	0.705958	1.63123	0.00395888	0.0196277	2.71828	2.01232	2.65724	3.25464	3.21982	6.50245	5.20536	5.12187
ENSRNOG00000018364	Kat2a	chr10:88611586-88619537	-	protein_coding	0.916032	1.88692	0.0105515	0.0350906	4.33257	3.41654	12.4792	8.88583	8.1362	22.3693	17.8879	17.53
ENSRNOG00000018393	Uts2	chr5:168078748-168084145	+	protein_coding	0.842865	1.79361	0.0183862	0.0500918	0.842865	0	0	0	0	1.30413	0.836861	0.363323
ENSRNOG00000018421	Aen	chr1:140584380-140593745	+	protein_coding	1.9894	3.97072	0.000650778	0.00779376	3.30063	1.31123	1.38175	1.64463	1.42606	11.8377	8.32317	6.99317
ENSRNOG00000018450	Slc25a22	chr1:213973489-213981330	-	protein_coding	0.702315	1.62711	0.0030217	0.0169867	2.24531	1.54299	2.11082	1.77063	1.87083	3.67458	3.25014	4.36498
ENSRNOG00000018453	Nop2	chr4:157647082-157658390	+	protein_coding	1.11886	2.17175	0.00135181	0.0111063	4.35172	3.23286	8.61415	8.24661	8.34698	21.9755	20.9816	15.8527
ENSRNOG00000018467	Mitd1	chr9:44472365-44560837	-	protein_coding	2.75156	6.73446	0.000170959	0.00440825	5.82936	3.0778	9.25133	6.83577	6.49325	63.1033	60.6411	45.5253
ENSRNOG00000018481	Zfp259	chr8:50563047-50572621	+	protein_coding	0.657475	1.57732	0.00336129	0.0180248	4.43904	3.78156	13.2938	12.5841	12.3941	22.7376	21.7668	17.8849
ENSRNOG00000018484	Plk3	chr5:135997725-136002900	-	protein_coding	0.75949	1.69289	0.00735615	0.028175	3.63681	2.87732	7.06376	6.91827	5.21314	13.025	11.078	10.3623
ENSRNOG00000018488	Cd40	chr3:161519743-161534704	+	protein_coding	4.23489	18.8291	3.78628e-05	0.00292987	6.488	2.2531	3.971	4.45229	2.99697	106.925	91.3675	71.5441
ENSRNOG00000018517	Trim21	chr1:167686173-167708714	-	protein_coding	1.45325	2.73825	0.0316737	0.0726662	5.00685	3.5536	20.298	6.87707	8.64971	35.4931	30.4615	27.95
ENSRNOG00000018547	Mrpl46	chr1:140469280-140477796	-	protein_coding	0.664605	1.58513	0.0377021	0.0826225	3.8564	3.19179	6.47296	8.65222	9.57688	16.7746	12.9495	11.2552
ENSRNOG00000018552	Slc25a38	chr8:128790348-128802989	+	protein_coding	0.817534	1.76239	0.0331018	0.0750779	3.6348	2.81727	8.77728	5.53887	4.47679	11.8239	10.3513	12.1671
ENSRNOG00000018553	Pitpnm1	chr1:219348721-219362094	+	protein_coding	0.67281	1.59417	0.00583249	0.0245434	4.53558	3.86277	14.3148	13.93	12.4666	26.0451	20.8698	20.0912
ENSRNOG00000018556	Tomm40	chr1:80618154-80630038	-	protein_coding	0.684836	1.60752	0.000697913	0.00800877	4.21848	3.53364	11.5	10.0032	10.2919	16.4746	18.2872	18.142
ENSRNOG00000018561	Pprc1	chr1:265809754-265826306	+	protein_coding	1.60677	3.04569	0.00148801	0.0116711	4.03008	2.42331	4.73875	4.09001	4.28364	20.5724	13.0666	13.3695
ENSRNOG00000018567	Slc20a1	chr3:121725859-121739173	+	protein_coding	1.14171	2.20642	0.00235686	0.0147685	5.66679	4.52509	25.3029	21.7353	19.4107	42.6998	49.4841	58.4277
ENSRNOG00000018630	Gapdh	chr4:157676595-157679962	-	protein_coding	0.75177	1.68386	0.00234573	0.0147233	8.32984	7.57807	195.911	208.618	168.035	304.861	347.781	311.259
ENSRNOG00000018646	Hbegf	chr18:29329764-29340403	-	protein_coding	0.956188	1.94018	0.0143609	0.0423289	3.94735	2.99116	8.37874	5.11798	7.76063	14.8512	16.7461	12.0511
ENSRNOG00000018659	Csf1	chr2:210522375-210550560	-	protein_coding	2.46761	5.53128	0.00188626	0.0131076	5.37793	2.91031	7.19449	6.92141	5.54562	26.6037	42.6076	58.7342
ENSRNOG00000018669	Jak3	chr16:20109200-20120668	+	protein_coding	0.780328	1.71752	0.00448267	0.0211067	3.352	2.57167	5.79028	4.987	4.1684	8.65	8.764	10.2981
ENSRNOG00000018691	Aurkaip1	chr5:173256637-173276169	+	protein_coding	0.710467	1.63633	0.00564947	0.0241332	6.23282	5.52235	52.1341	40.5751	42.9515	82.2413	68.7909	72.2246
ENSRNOG00000018694	Lipg	chr18:70901710-70924708	-	protein_coding	3.09864	8.56613	0.000341301	0.00587401	4.67284	1.57419	1.66162	1.93956	2.37451	34.7309	22.5221	18.7457
ENSRNOG00000018704	Nolc1	chr1:265829108-265839818	+	protein_coding	1.10191	2.14638	0.00088736	0.00897419	4.65788	3.55597	10.7128	10.0168	11.608	25.1133	20.8068	27.2509
ENSRNOG00000018706	Il15ra	chr17:70451411-70481750	-	protein_coding	3.48129	11.168	0.000110555	0.0038464	4.53189	1.05059	1.19976	0.983599	1.0368	26.7627	25.3021	15.9531
ENSRNOG00000018715	Clec10a	chr10:56764927-56769457	+	protein_coding	2.43419	5.4046	0.00579528	0.0244647	6.05681	3.62262	7.83494	15.6042	11.7389	79.0156	90.7142	39.2008
ENSRNOG00000018757	Insl3	chr16:20121352-20122696	+	protein_coding	0.712498	1.63864	0.00896717	0.0318099	1.15243	0.439929	0.380834	0.303365	0.387036	1.4359	0.813264	1.4867
ENSRNOG00000018767	Rbm17	chr17:70586394-70603267	+	protein_coding	1.04092	2.05754	0.00633548	0.0258448	5.91692	4.876	26.37	26.1335	33.0947	71.9059	60.8134	47.9403
ENSRNOG00000018770	Pmaip1	chr18:62174670-62181102	+	protein_coding	2.74858	6.72055	0.00277007	0.0161192	4.85951	2.11093	3.40148	4.14613	2.55865	48.066	23.8076	19.1008
ENSRNOG00000018781	Map1s	chr16:20267581-20278814	-	protein_coding	1.02848	2.03988	0.00134721	0.0111062	3.37578	2.3473	4.89689	3.4361	4.03726	9.73386	9.76937	8.67572
ENSRNOG00000018816	Cox5a	chr8:62298358-62309765	+	protein_coding	0.701327	1.626	0.0120026	0.0381288	6.79908	6.09775	77.2935	67.4802	58.9138	129.278	99.0428	104.955
ENSRNOG00000018827	Htr7	chr1:254547620-254671778	-	protein_coding	0.900022	1.86609	0.0100142	0.0339922	0.934834	0.0348113	0.0750725	0	0	1.27586	1.08681	0.470996
ENSRNOG00000018849	Tcerg1	chr18:36829062-36889966	+	protein_coding	0.697029	1.62116	0.0151518	0.0438773	5.21231	4.51528	24.7579	17.9965	23.4412	41.8362	33.5599	33.4194
ENSRNOG00000018909	Arv1	chr19:57484634-57496695	+	protein_coding	0.857003	1.81127	0.00707015	0.0274911	3.53568	2.67868	6.01261	5.08547	5.15052	13.3362	9.10145	9.77006
ENSRNOG00000018910	Abhd11	chr12:24722283-24724997	-	protein_coding	1.1495	2.21838	0.0165402	0.0466351	3.93917	2.78967	6.52443	6.63273	4.75664	20.889	12.2049	11.4872
ENSRNOG00000018911	Pfkfb3	chr17:70684134-70713726	+	protein_coding	1.53923	2.90639	0.0151553	0.0438789	6.73994	5.20072	46.5162	32.4499	30.2954	67.5485	121.572	144.341
ENSRNOG00000018971	Mob3a	chr7:11878943-11896223	+	protein_coding	1.18695	2.2767	0.0230974	0.0583942	3.90413	2.71718	6.73197	4.40037	5.80996	8.9583	17.6982	17.0216
ENSRNOG00000019023	Tars	chr2:61394770-61414102	-	protein_coding	1.23636	2.35604	0.00212537	0.0139376	5.2315	3.99513	13.6534	17.8077	13.7127	31.0974	42.688	36.8164
ENSRNOG00000019028	Znrf1	chr19:43750278-43832878	+	protein_coding	1.72221	3.29941	1.22191e-05	0.00253197	5.77344	4.05123	16.8976	14.5464	15.3757	51.7299	54.3192	55.105
ENSRNOG00000019041	Psme1	chr15:34256071-34258947	+	protein_coding	1.21959	2.3288	0.000550739	0.00718263	8.39461	7.17502	154.881	148.827	128.215	308.829	322.955	378.735
ENSRNOG00000019048	Sod2	chr1:47914759-47921587	-	protein_coding	5.8827	59.0025	0.000488798	0.00681043	10.1769	4.29421	19.7898	18.9616	17.1974	1654.25	1768.16	528.708
ENSRNOG00000019073	Ikbkb	chr16:74177215-74230815	+	protein_coding	0.645639	1.56443	0.00318791	0.0174621	5.0658	4.42017	21.0695	20.2083	19.9657	28.8238	36.8621	32.2744
ENSRNOG00000019079	Polr1c	chr9:17120759-17124871	+	protein_coding	0.751766	1.68385	0.0189947	0.0513062	4.56116	3.80939	14.7977	13.9354	10.6791	26.1808	23.9175	18.4252
ENSRNOG00000019090	Cct3	chr2:187668796-187693610	+	protein_coding	0.670463	1.59158	0.000204921	0.00472629	5.69147	5.02101	30.9182	31.8885	31.6091	51.3102	53.5005	47.4085
ENSRNOG00000019142	Fas	chr1:252589785-252624790	+	protein_coding	1.56539	2.95957	0.0137811	0.0413003	3.82572	2.26033	3.46464	3.58803	4.36865	21.0491	13.0536	8.20002
ENSRNOG00000019202	PVR	chr1:80820050-80835701	-	protein_coding	1.82415	3.54098	9.22031e-05	0.00363468	4.79086	2.96671	7.58734	6.60983	6.31091	28.3285	28.6506	23.3922
ENSRNOG00000019208	P2rx5	chr10:59725619-59740865	+	protein_coding	1.21471	2.32095	0.0391485	0.0850517	1.31994	0.105223	0.156491	0.070163	0.005619	0.449088	2.02703	2.54741
ENSRNOG00000019229	Fbl	chr1:85103519-85112619	+	protein_coding	1.5195	2.86692	0.000121211	0.00389993	6.46969	4.95019	33.1007	30.1667	26.7977	94.8867	84.7908	83.6276
ENSRNOG00000019246	Psme2	chr15:34265557-34269851	-	protein_coding	2.20778	4.61965	6.98144e-05	0.00339194	7.8711	5.66332	52.0484	50.0295	47.0831	198.362	240.528	265.503
ENSRNOG00000019270	P2ry6	chr1:165972440-165997751	-	protein_coding	2.12655	4.36671	0.00421137	0.020322	3.28839	1.16184	1.37794	1.2428	1.10019	14.3571	8.32029	5.51585
ENSRNOG00000019283	P2ry2	chr1:166031272-166037424	-	protein_coding	1.98952	3.97106	0.000316007	0.00562523	5.21354	3.22402	8.51006	10.2873	6.59981	36.5324	33.933	37.9633
ENSRNOG00000019311	Nfkb2	chr1:266053002-266059256	+	protein_coding	2.73715	6.6675	1.71833e-05	0.00253197	6.29858	3.56144	10.0725	11.0978	11.2842	88.2642	77.3395	68.7478
ENSRNOG00000019330	Procr	chr3:151285249-151289595	+	protein_coding	3.07757	8.44188	0.00518734	0.0229439	5.69237	2.61481	4.82854	6.06685	4.57981	93.5186	24.7671	55.7728
ENSRNOG00000019332	Gtpbp2	chr9:17198957-17209220	-	protein_coding	0.748639	1.68021	0.00415628	0.0201745	4.55581	3.80717	14.2069	12.9945	11.889	22.8907	19.5419	25.5115
ENSRNOG00000019353	Ctrl	chr19:37905864-37907714	-	protein_coding	1.67909	3.20225	0.000654312	0.00779376	2.08182	0.402736	0.507066	0.143938	0.340209	3.89784	3.32477	2.58184
ENSRNOG00000019372	Pc	chr1:219759183-219859848	+	protein_coding	0.645611	1.5644	0.024399	0.0607386	3.23191	2.5863	4.60026	6.24411	4.33907	7.28169	8.07503	10.0341
ENSRNOG00000019412	Rhbg	chr2:187610087-187622373	-	protein_coding	0.746879	1.67816	0.023413	0.0590221	2.37126	1.62438	2.2829	2.40323	1.62307	3.79658	3.41124	5.54584
ENSRNOG00000019428	Higd1a	chr8:130482493-130491998	-	protein_coding	1.0692	2.09827	0.00366175	0.0186858	5.29535	4.22615	19.5398	17.9009	15.8854	47.2306	36.4229	32.5518
ENSRNOG00000019438	Rnf31	chr15:34270648-34282495	+	protein_coding	0.58865	1.50384	0.00558984	0.0240054	4.11822	3.52957	12.1196	10.1534	9.52429	17.3529	15.228	16.5854
ENSRNOG00000019450	Etf1	chr18:27698695-27725694	-	protein_coding	0.801154	1.74249	0.0006803	0.0079163	5.75794	4.95679	28.711	30.753	30.7483	52.7525	58.6073	48.4584
ENSRNOG00000019456	Kars	chr19:44212206-44231157	-	protein_coding	1.30919	2.47803	7.36758e-05	0.00348442	6.58552	5.27633	35.3193	41.1479	37.0263	100.945	93.7806	90.6716
ENSRNOG00000019463	Mad2l1bp	chr9:17216495-17221434	+	protein_coding	1.90609	3.74792	0.023229	0.0586534	4.15215	2.24606	5.30587	2.25689	4.19809	28.6244	17.8482	9.0657
ENSRNOG00000019477	Zmynd15	chr10:57064482-57071096	+	protein_coding	2.24233	4.7316	0.000225004	0.00487665	3.73038	1.48805	2.33698	1.77046	1.38746	12.8015	10.4686	13.7716
ENSRNOG00000019478	Irf9	chr15:34282936-34288138	+	protein_coding	0.912011	1.88167	0.000116819	0.00389319	6.04687	5.13486	36.8194	33.3061	32.4314	67.531	64.7914	63.0934
ENSRNOG00000019494	Psmb10	chr19:37909546-37912027	-	protein_coding	2.01891	4.05278	8.16788e-05	0.00362032	7.61589	5.59698	51.5715	41.8575	49.3264	173.589	204.055	209.835
ENSRNOG00000019497	Mrpl17	chr1:170652294-170653920	-	protein_coding	0.688343	1.61143	0.000546154	0.00716852	5.68771	4.99936	32.8881	32.0921	28.1813	51.0568	49.5714	51.0151
ENSRNOG00000019501	Rmnd1	chr1:40948847-40972826	-	protein_coding	0.813124	1.75701	0.0133885	0.0406151	4.05417	3.24104	7.82735	10.083	7.63905	18.9778	15.6315	12.7974
ENSRNOG00000019542	MGC108823	chr18:55576239-55584957	+	protein_coding	2.02529	4.07074	0.014193	0.0420929	2.39671	0.371416	0.381685	0.018822	0.537853	7.99309	4.3645	2.02695
ENSRNOG00000019549	Akap12	chr1:40816107-40906581	+	protein_coding	0.80584	1.74816	0.0368963	0.0812513	5.94809	5.14225	31.533	34.2524	37.4062	85.3328	55.8959	46.9075
ENSRNOG00000019550	Slc11a2	chr7:142025815-142063212	-	protein_coding	1.92908	3.80811	0.000139271	0.0041251	5.29135	3.36227	9.04197	10.2835	8.59784	39.8542	32.5334	42.838
ENSRNOG00000019552	Lsm7	chr7:11724962-11727388	+	protein_coding	0.889969	1.85314	0.0284049	0.067268	5.6352	4.74524	35.8624	19.1422	24.9826	54.459	46.8262	45.287
ENSRNOG00000019553	Ipo4	chr15:34304425-34314345	-	protein_coding	1.07211	2.10251	0.00137943	0.0112126	4.64498	3.57287	12.2465	11.0104	9.5917	22.5253	22.2287	27.6601
ENSRNOG00000019559	Eaf1	chr16:7588217-7602966	+	protein_coding	0.855738	1.80968	0.00296031	0.0167713	4.16562	3.30988	9.13546	8.45333	9.17862	18.2241	18.9763	14.051
ENSRNOG00000019573	Lcat	chr19:37913336-37916813	-	protein_coding	0.8655	1.82197	0.0366122	0.080809	3.49959	2.63409	7.45892	3.92403	4.74356	11.6334	8.10103	11.5844
ENSRNOG00000019587	Ptprn	chr9:82446633-82461903	-	protein_coding	1.17534	2.25847	0.000416329	0.00639951	1.43611	0.260767	0.132139	0.390955	0.092152	1.70275	1.72233	1.69271
ENSRNOG00000019634	Eif4e2	chr9:94307852-94336831	+	protein_coding	0.6499	1.56906	4.32718e-06	0.00229601	4.62045	3.97055	14.8773	14.2923	14.8676	23.8056	23.5377	23.451
ENSRNOG00000019653	Csrnp2	chr7:142116335-142132173	-	protein_coding	0.812836	1.75666	0.0480863	0.098746	2.53346	1.72062	2.27937	1.91946	2.73925	6.41334	5.52353	3.01278
ENSRNOG00000019670	Wdr3	chr2:202447745-202470399	-	protein_coding	0.655953	1.57566	0.00862988	0.0310687	4.06631	3.41035	9.83472	8.733	10.397	17.7677	16.5537	13.2713
ENSRNOG00000019737	Sema4a	chr2:187799568-187822997	-	protein_coding	1.57854	2.98667	0.0122333	0.0385476	6.3108	4.73226	24.941	28.5818	23.4707	128.256	64.612	57.9907
ENSRNOG00000019742	Stat3	chr10:88790408-88842233	-	protein_coding	1.70296	3.25568	1.68034e-05	0.00253197	6.75701	5.05406	30.0443	34.4473	32.3198	112.675	107.48	101.606
ENSRNOG00000019780	Sypl2	chr2:211003046-211017778	-	protein_coding	1.26571	2.40446	0.0483616	0.0991154	1.32382	0.0581041	0.024678	0.049712	0.049097	3.24155	1.56909	0.439532
ENSRNOG00000019811	LOC100362432	chr16:8324036-8350067	-	protein_coding	1.30105	2.46408	0.0320962	0.0734037	5.67692	4.37587	30.1882	16.396	15.4956	43.5611	39.2604	73.6342
ENSRNOG00000019813	Ppp4c	chr1:198219054-198225580	-	protein_coding	1.16347	2.23996	0.00230752	0.0145652	6.21742	5.05395	34.7258	32.8025	29.3557	86.3144	76.6037	59.8026
ENSRNOG00000019823	LOC100910944	chr3:151688454-151689711	+	protein_coding	0.633753	1.5516	0.0273392	0.0654906	1.07536	0.441605	0.482222	0.240666	0.362201	1.64638	0.775262	0.99173
ENSRNOG00000019824	Ell	chr16:20594072-20641908	-	protein_coding	0.820648	1.7662	0.000552237	0.00718263	4.39325	3.5726	11.3496	10.513	10.8451	19.9826	18.1902	22.0442
ENSRNOG00000019846	Muc5b	chr1:214778496-214810720	+	protein_coding	0.748921	1.68054	0.0331876	0.0752139	1.74088	0.991961	0.68576	1.03857	1.28933	1.77195	2.09317	3.35497
ENSRNOG00000019851	Cox6a2	chr1:199624037-199624783	-	protein_coding	1.417	2.67029	0.00419291	0.0202853	1.88946	0.472463	0.175026	0.715884	0.324772	3.52619	2.80904	1.94988
ENSRNOG00000019864	Fam132a	chr5:173390901-173395276	+	protein_coding	0.662326	1.58263	0.0236811	0.0594809	0.986063	0.323738	0.387332	0.214978	0.163096	1.46207	0.643162	0.920979
ENSRNOG00000019868	Psma5	chr2:211050360-211073714	+	protein_coding	1.14897	2.21756	0.000272866	0.00529268	7.15604	6.00707	70.79	57.7369	62.088	138.581	150.453	136.227
ENSRNOG00000019907	Nfkbie	chr9:17828408-17835240	-	protein_coding	2.00255	4.00708	8.89558e-05	0.00363468	3.8871	1.88455	2.49448	3.19677	2.43261	12.1751	14.5434	14.8164
ENSRNOG00000019924	Thop1	chr7:11501146-11513581	-	protein_coding	0.835873	1.78494	0.00881497	0.0314592	3.38973	2.55386	4.72816	5.46208	4.46985	8.22759	12.0678	8.54863
ENSRNOG00000019943	Slc7a6	chr19:38162515-38179149	+	protein_coding	1.04745	2.06687	0.0245345	0.0609715	4.85604	3.8086	10.9656	15.709	12.76	32.195	35.259	19.1817
ENSRNOG00000019996	Slc16a1	chr2:207108552-207128554	+	protein_coding	1.25069	2.37955	3.69169e-05	0.00291784	4.02459	2.7739	5.39268	6.36105	5.79929	15.712	15.2324	14.8913
ENSRNOG00000020020	Wbp1l	chr1:266358728-266415296	+	protein_coding	2.5695	5.93606	0.024741	0.0612526	5.11483	2.54532	5.64961	4.59395	4.34737	11.6763	53.6976	59.0048
ENSRNOG00000020025	Slc29a2	chr1:220400855-220407189	+	protein_coding	0.708729	1.63436	0.00828632	0.0302858	1.26023	0.551498	0.546713	0.561027	0.303864	1.8184	1.26063	1.15708
ENSRNOG00000020029	Mcrip2	chr10:15230801-15235740	-	protein_coding	0.925577	1.89944	0.0274589	0.0656694	2.72251	1.79694	3.08732	2.36946	2.04647	8.06481	5.20714	4.11006
ENSRNOG00000020063	Nfkbib	chr1:86941074-86948845	-	protein_coding	1.92007	3.78443	0.000279813	0.00533398	4.9349	3.01483	8.86984	6.74128	5.91093	31.2643	30.0917	27.5294
ENSRNOG00000020083	Scly	chr9:98438439-98459080	+	protein_coding	0.69749	1.62168	0.00649092	0.0262293	3.881	3.18351	9.12373	8.21107	7.04167	12.4636	13.2282	15.6949
ENSRNOG00000020106	Tnfrsf4	chr5:173447784-173450474	+	protein_coding	1.07515	2.10694	0.00694252	0.0272363	1.84388	0.768738	1.1231	0.461095	0.594378	3.085	2.00108	2.77334
ENSRNOG00000020136	Tgm1	chr15:34378148-34392066	-	protein_coding	2.70873	6.53748	8.75619e-05	0.00363468	5.34758	2.63885	5.22248	5.8212	4.69233	46.4991	41.6002	32.3617
ENSRNOG00000020139	RGD1565775	chr2:188052236-188080301	+	protein_coding	0.713128	1.63935	0.0345451	0.0773138	4.94952	4.23639	20.6876	16.767	16.3786	30.1168	23.1516	38.257
ENSRNOG00000020148	Il4i1	chr1:100830064-100836677	+	protein_coding	1.07399	2.10524	0.000397368	0.006279	1.86154	0.787558	0.704391	0.699907	0.775177	2.97131	2.18955	2.78861
ENSRNOG00000020150	Il18bp	chr1:167091522-167093560	-	protein_coding	3.24461	9.47817	4.7888e-06	0.00229601	6.08337	2.83877	6.3224	6.72995	5.46891	61.8868	67.2138	71.678
ENSRNOG00000020182	Mvp	chr1:198420806-198450047	-	protein_coding	0.82789	1.77509	0.00120261	0.0105359	6.66228	5.83439	59.6772	55.6935	53.0039	88.7961	104.496	108.685
ENSRNOG00000020247	Cnih2	chr1:220474493-220480132	-	protein_coding	0.608359	1.52452	0.00252863	0.0153804	0.766345	0.157986	0.128356	0.093658	0.125506	0.87116	0.735922	0.515085
ENSRNOG00000020280	Armc6	chr16:20939655-20954246	+	protein_coding	0.616515	1.53317	0.0438249	0.0925701	2.61302	1.99651	3.75274	2.95832	2.37732	4.83671	6.53083	4.20936
ENSRNOG00000020373	Dap3	chr2:188225613-188252725	-	protein_coding	0.661157	1.58135	0.00344949	0.0182374	4.4521	3.79094	13.2615	13.3577	11.9513	23.6941	20.5914	18.6685
ENSRNOG00000020374	Tmem8a	chr10:15484795-15495377	+	protein_coding	0.640009	1.55834	0.0113518	0.0366702	1.98161	1.3416	1.10958	1.84842	1.70886	2.67227	3.04746	3.14434
ENSRNOG00000020391	Nip7	chr19:39257586-39259728	+	protein_coding	1.36964	2.58406	0.021304	0.0553357	4.83281	3.46318	11.8176	12.7985	6.58441	19.6197	36.9017	28.6158
ENSRNOG00000020465	Ripk3	chr15:34470796-34479741	-	protein_coding	2.44172	5.43289	0.000535658	0.00709478	4.70322	2.2615	5.03907	4.23062	2.48995	26.739	24.3628	24.1274
ENSRNOG00000020481	Pafah1b3	chr1:82163595-82166363	-	protein_coding	0.86	1.81504	0.000391081	0.00622264	3.27696	2.41696	4.47679	4.42007	4.13102	9.32011	9.05849	7.77353
ENSRNOG00000020501	Tjp3	chr7:11295892-11315615	+	protein_coding	2.25025	4.75766	2.42253e-05	0.00260395	4.43304	2.18278	3.43223	3.52083	3.67101	20.9846	23.084	18.0363
ENSRNOG00000020527	Drap1	chr1:220803796-220806433	-	protein_coding	0.829242	1.77675	0.00921413	0.0323987	6.00389	5.17465	34.5149	38.8929	32.2558	77.2299	62.0765	52.5567
ENSRNOG00000020552	Fosl1	chr1:220826560-220835066	+	protein_coding	1.28658	2.43949	0.0253956	0.062376	1.36887	0.0822951	0.050497	0.102409	0.024666	2.31515	0.54941	2.35387
ENSRNOG00000020580	LOC500956	chr8:21890319-21896031	+	protein_coding	2.17599	4.51895	0.00115094	0.0103356	5.781	3.60502	13.0261	10.4764	10.1921	75.6801	46.9242	44.2406
ENSRNOG00000020593	Gipc3	chr7:11245875-11250708	+	protein_coding	0.817805	1.76272	0.0186401	0.0505847	1.77445	0.956644	0.947911	1.41891	0.551481	2.18184	2.96705	2.17205
ENSRNOG00000020608	Ppan	chr8:21905865-21909842	+	protein_coding	1.42534	2.68578	0.00742472	0.0283332	4.79593	3.37059	11.8794	8.43223	8.10829	37.4456	23.36	21.8893
ENSRNOG00000020651	Cars	chr1:216759366-216801656	-	protein_coding	1.10712	2.15415	0.00160974	0.0121047	4.20734	3.10022	8.42518	8.34134	6.16276	16.3677	16.969	19.1996
ENSRNOG00000020667	Shisa5	chr8:117780891-117795919	+	protein_coding	0.910209	1.87932	0.00110269	0.0101146	6.21256	5.30235	43.0197	39.7817	33.2285	73.3947	74.3541	71.7532
ENSRNOG00000020678	Ifi35	chr10:89358376-89366626	+	protein_coding	0.960578	1.94609	0.00218101	0.0141537	5.61776	4.65718	27.4605	24.0838	21.5018	42.0402	52.2279	50.6807
ENSRNOG00000020733	Camp	chr8:117930546-117932518	-	protein_coding	4.50946	22.7762	0.000148788	0.00421193	6.31179	1.80234	1.81951	2.37658	3.4568	108.021	77.1327	57.8539
ENSRNOG00000020744	Adar	chr2:189062443-189083236	+	protein_coding	1.06183	2.08758	0.000112867	0.00386087	5.92062	4.85879	30.0808	27.6225	26.4616	60.3405	62.6185	55.9541
ENSRNOG00000020848	Adck4	chr1:84044551-84067066	+	protein_coding	2.44745	5.4545	0.000299287	0.0055143	5.34886	2.90141	7.12298	7.54463	5.00935	47.2093	39.2327	33.8972
ENSRNOG00000020902	G6pc3	chr10:90134193-90138425	+	protein_coding	0.618257	1.53502	0.0215844	0.0558148	3.90193	3.28367	9.48547	9.03772	7.77456	17.3954	12.2756	12.6781
ENSRNOG00000020925	Ccdc86	chr1:226996237-227002139	-	protein_coding	1.33703	2.52631	0.000581532	0.00735997	4.31705	2.98002	7.67796	6.84255	6.21687	21.2033	16.1791	19.7618
ENSRNOG00000020938	Ppp1r15a	chr1:101511901-101514974	-	protein_coding	1.66121	3.16282	0.00165765	0.0122496	6.0963	4.43509	24.563	19.0415	18.7581	57.6139	87.1679	60.9726
ENSRNOG00000020942	Plekha4	chr1:101517714-101540802	+	protein_coding	1.46524	2.76109	0.00342606	0.0181891	4.0559	2.59066	5.92787	5.9253	3.55573	17.6141	13.0725	16.5642
ENSRNOG00000020947	Egln2	chr1:83969457-83977236	-	protein_coding	1.21863	2.32726	0.00630976	0.0257936	6.15843	4.9398	34.1528	27.3541	28.0072	93.3857	65.9458	56.6748
ENSRNOG00000020951	Slc4a1	chr10:90296141-90312386	-	protein_coding	1.03806	2.05346	0.0289145	0.0680272	3.53579	2.49773	6.92619	2.96415	4.73408	9.1622	10.4534	12.4034
ENSRNOG00000020979	Psmb4	chr2:196043618-196046311	-	protein_coding	0.89793	1.86339	0.00115381	0.0103452	7.51245	6.61452	99.3571	95.8482	95.799	196.713	194.524	156.466
ENSRNOG00000020991	Ms4a6a	chr1:227919301-227932603	-	protein_coding	0.9129	1.88283	0.0344102	0.0770934	2.3335	1.4206	1.05328	2.68361	1.53632	4.07338	3.18688	5.02795
ENSRNOG00000020998	Oosp1	chr1:228032983-228053645	-	protein_coding	0.633177	1.55098	0.000466363	0.00668209	1.38149	0.748315	0.652724	0.66365	0.723985	1.42939	1.61149	1.78757
ENSRNOG00000021007	Snx15	chr1:221487051-221496306	-	protein_coding	0.729862	1.65848	0.00149324	0.0116942	3.98847	3.25861	9.38713	8.48846	7.89459	16.2279	14.8722	13.6244
ENSRNOG00000021012	Rfx5	chr2:196120580-196128095	+	protein_coding	1.43852	2.71043	0.000259072	0.00520534	4.98698	3.54846	10.6429	11.7025	9.83007	35.2162	28.0622	29.3014
ENSRNOG00000021013	Stx3	chr1:228149867-228194977	-	protein_coding	0.823263	1.7694	0.00105144	0.00985885	4.12103	3.29777	9.30932	9.44936	7.82795	16.745	15.1174	17.4201
ENSRNOG00000021018	Batf2	chr1:221538104-221545782	+	protein_coding	2.75611	6.75574	0.000284644	0.00537522	3.2701	0.513983	0.360111	0.74676	0.225647	6.59065	10.2096	9.5517
ENSRNOG00000021029	Hamp	chr1:89368021-89369960	-	protein_coding	5.29556	39.2756	5.22052e-05	0.00317866	5.50822	0.21266	0.021772	0.236142	0.23205	64.7791	40.1122	33.8628
ENSRNOG00000021052	Patl1	chr1:228337767-228369761	+	protein_coding	0.893879	1.85817	0.0268666	0.0647533	4.39036	3.49648	6.91701	11.9906	12.978	20.6934	20.6053	18.6788
ENSRNOG00000021053	Lsr	chr1:89383519-89399041	-	protein_coding	0.904918	1.87244	0.000971888	0.00939771	5.43167	4.52675	20.3554	24.7356	21.2854	44.598	43.6861	38.4609
ENSRNOG00000021058	Grwd1	chr1:101813684-101819478	-	protein_coding	0.670261	1.59136	0.0193488	0.0519169	2.97083	2.30057	3.9709	4.64792	3.25889	5.80332	8.30712	6.61011
ENSRNOG00000021125	Prdx5	chr1:222164462-222167447	-	protein_coding	2.0984	4.28235	0.00023539	0.0049639	8.12486	6.02646	65.0599	72.4631	56.0722	267.419	330.694	243.302
ENSRNOG00000021130	Abcc8	chr1:102110708-102191287	-	protein_coding	0.844348	1.79545	0.000226594	0.00489718	0.889577	0.0452292	0.011888	0.031401	0.052655	0.832371	1.01243	0.72438
ENSRNOG00000021139	Esrra	chr1:222168730-222178725	-	protein_coding	1.27789	2.42485	0.0239762	0.0600354	4.70235	3.42446	11.9217	7.57965	10.1635	36.946	16.7395	25.2142
ENSRNOG00000021179	Naa40	chr1:222478021-222495382	-	protein_coding	1.09824	2.14093	0.00677144	0.0268352	2.19848	1.10025	1.21053	1.4887	0.791245	3.21573	4.736	2.99896
ENSRNOG00000021199	Fcgr1a	chr2:198430530-198458041	-	protein_coding	0.882662	1.84377	0.0130144	0.0399269	3.87702	2.99436	6.59553	8.16258	6.27104	10.4913	16.2423	15.0078
ENSRNOG00000021206	Pla2g16	chr1:222844144-222877193	+	protein_coding	0.88573	1.8477	0.00364127	0.0186463	7.6737	6.78797	107.42	113.357	107.837	175.306	194.806	245.576
ENSRNOG00000021270	Trmt6	chr3:125458692-125470413	-	protein_coding	1.42595	2.68692	0.0478649	0.0984191	3.88288	2.45693	3.87049	3.76757	6.12784	21.8556	16.9825	6.81177
ENSRNOG00000021412	Slfn13	chr10:70326157-70342492	-	protein_coding	2.13077	4.3795	0.000223282	0.00485379	5.74749	3.61673	13.8119	10.5265	9.81238	58.5687	46.5118	53.7876
ENSRNOG00000021438	Tuba1c	chr7:140716113-140723714	+	protein_coding	1.95639	3.88091	0.00278541	0.0161516	5.95581	3.99942	13.6844	19.4405	12.6298	78.0411	65.7836	44.3014
ENSRNOG00000021440	Pptc7	chr12:39731121-39769480	-	protein_coding	0.802136	1.74368	0.0401715	0.0867301	3.10336	2.30122	4.01308	3.67864	4.10491	5.4218	7.18863	11.0711
ENSRNOG00000021513	Rtn4rl2	chr3:72273424-72289310	-	protein_coding	2.22423	4.67263	0.00397159	0.0196392	3.12957	0.905335	0.547183	0.487746	1.85449	5.51426	9.56016	8.7442
ENSRNOG00000021548	Rassf1	chr8:116307141-116318289	+	protein_coding	2.46624	5.52603	0.0114678	0.0369545	5.57676	3.11051	6.7822	8.46037	7.7511	73.6119	64.3095	21.3115
ENSRNOG00000021578	Wfikkn1	chr10:15243429-15245757	-	protein_coding	1.01064	2.01481	0.0191908	0.0516358	1.51728	0.506633	0.058085	0.710173	0.584802	1.60601	2.55744	1.53003
ENSRNOG00000021611	Clip2	chr12:25173005-25237009	+	protein_coding	0.687172	1.61012	0.00431304	0.0206535	3.57473	2.88756	7.06387	5.69774	6.50337	10.0547	10.3738	12.4541
ENSRNOG00000021644	Slc15a3	chr1:226897625-226912708	+	protein_coding	2.75876	6.76813	6.0428e-05	0.00332881	6.382	3.62324	13.9852	10.8286	9.55639	77.7374	87.2397	82.4973
ENSRNOG00000021773	Bop1	chr7:117514533-117538342	-	protein_coding	1.20006	2.2975	0.00455937	0.0213553	4.43184	3.23177	9.26301	7.82415	8.15444	21.2105	25.9649	15.7876
ENSRNOG00000021787	Zfp217	chr3:166983220-166994286	-	protein_coding	0.894124	1.85848	3.48683e-05	0.00285914	3.69355	2.79943	5.88557	5.92225	6.07862	11.3769	12.6764	11.7946
ENSRNOG00000021802	Isg15	chr5:173624310-173626248	-	protein_coding	4.39981	21.1094	0.000152713	0.00422273	9.40762	5.0078	41.6367	31.4243	23.0903	794.492	770.958	509.145
ENSRNOG00000021817	Irak2	chr4:145594575-145651053	+	protein_coding	1.70335	3.25655	0.00354115	0.0184056	5.45761	3.75426	9.55896	15.1296	13.4276	50.0593	49.4453	31.9471
ENSRNOG00000021919	Rhoj	chr6:98284170-98367756	+	protein_coding	2.4664	5.52662	7.95389e-05	0.00358122	7.54692	5.08052	33.5486	31.947	33.0348	161.76	227.596	174.766
ENSRNOG00000022012	Tnfrsf18	chr5:173460354-173463140	+	protein_coding	0.612056	1.52844	0.00434686	0.0207199	1.52813	0.91607	1.14138	0.809761	0.733719	1.88972	2.05675	1.71594
ENSRNOG00000022071	Itga2b	chr10:90398132-90415070	-	protein_coding	2.24296	4.73367	0.000208964	0.00473014	4.37862	2.13566	3.66394	2.49939	4.19928	20.7522	18.9904	19.6995
ENSRNOG00000022099	Trim72	chr1:199449973-199457895	+	protein_coding	2.15612	4.45714	0.000445591	0.00659902	2.30833	0.152214	0.161211	0.105475	0.069062	5.42356	2.99946	3.72993
ENSRNOG00000022101	Crabp2	chr2:187322416-187326789	+	protein_coding	1.31844	2.49397	0.0222863	0.0570598	2.41865	1.1002	1.59643	1.04327	0.857292	7.24679	3.96236	2.73493
ENSRNOG00000022218	Ifi44	chr2:256897772-256915569	-	protein_coding	2.78913	6.91215	0.000219844	0.00483691	7.65822	4.86908	34.8299	27.5831	23.3705	237.867	204.992	166.515
ENSRNOG00000022229	Sdad1	chr14:17247362-17274623	+	protein_coding	0.96177	1.9477	0.00252676	0.0153804	3.47053	2.50876	5.11429	4.06727	4.94995	11.7522	10.038	8.67659
ENSRNOG00000022234	mrpl24	chr2:187288644-187294656	+	protein_coding	0.856691	1.81088	0.000412914	0.00638152	4.17557	3.31888	8.11534	9.06899	9.82655	17.0413	16.3844	17.8144
ENSRNOG00000022242	Cxcl9	chr14:17228856-17234712	+	protein_coding	8.49631	361.113	0.00039737	0.006279	9.22589	0.72958	0.772359	0.914409	0.343663	339.162	1718.06	366.137
ENSRNOG00000022247	Nr2c2ap	chr16:21036646-21038844	-	protein_coding	0.957219	1.94156	0.0054353	0.0236451	4.2409	3.28368	8.38811	9.94825	7.98532	21.5159	18.1959	14.6391
ENSRNOG00000022256	Cxcl10	chr14:17210733-17212930	+	protein_coding	7.25165	152.393	0.000315332	0.00562523	9.17328	1.92163	5.83545	1.0012	2.9751	821.343	652.287	357.214
ENSRNOG00000022298	Cxcl11	chr14:17195014-17198291	+	protein_coding	9.58979	770.576	2.06684e-05	0.00255145	10.4208	0.831056	0.53754	1.49413	0.468156	1721.26	1734.11	861.06
ENSRNOG00000022323	Tcea1	chr5:14511183-14548429	-	protein_coding	1.1636	2.24015	0.0285578	0.0674873	6.43551	5.27191	43.9145	23.3512	51.7355	77.3296	90.9313	89.0433
ENSRNOG00000022368	Ddx49	chr16:20873642-20881439	+	protein_coding	0.711639	1.63766	0.0264301	0.0640407	4.32268	3.61104	11.0894	10.6052	12.0027	22.4532	21.557	14.1456
ENSRNOG00000022414	Zfp142	chr9:81844138-81868086	-	protein_coding	0.693508	1.61721	0.0243822	0.060726	3.695	3.0015	8.14927	6.11296	6.89195	15.1825	11.1961	10.0067
ENSRNOG00000022448	Htra2	chr4:113883670-113886994	-	protein_coding	0.819419	1.76469	0.00480947	0.0219745	4.73646	3.91705	11.8886	14.9269	15.7922	27.9696	22.7527	26.5295
ENSRNOG00000022533	Micall2	chr12:16988136-17016791	+	protein_coding	1.8656	3.6442	0.000818487	0.00862902	3.15361	1.28801	1.47835	1.54813	1.30572	6.29937	7.29058	10.6447
ENSRNOG00000022540	Trex1	chr8:117796128-117797427	-	protein_coding	2.6077	6.0953	0.0351671	0.078368	3.55629	0.948589	1.20869	0.001598	2.24963	26.7568	9.29392	4.69767
ENSRNOG00000022565	Lrrc25	chr16:20558222-20562399	-	protein_coding	1.96289	3.89842	0.000362605	0.00604051	2.46336	0.500473	0.414199	0.478184	0.354356	4.04012	3.7679	5.98025
ENSRNOG00000022597	Cenpj	chr15:36746088-36798814	-	protein_coding	0.771036	1.7065	0.0160941	0.0456696	3.9974	3.22637	7.5065	7.64787	10.144	12.8069	14.2186	18.3885
ENSRNOG00000022669	Cd177	chr1:82964683-82987253	-	protein_coding	3.45551	10.9701	0.00844028	0.0306439	4.60207	1.14656	0.489294	3.29335	0.69695	11.5172	43.3992	24.7751
ENSRNOG00000022707	Pmp2	chr2:93827504-93831419	+	protein_coding	1.04032	2.05669	0.0128231	0.0396272	1.09817	0.0578458	0.062344	0.061634	0	1.58689	1.47263	0.533934
ENSRNOG00000022769	Sp100	chr9:92681078-92717929	+	protein_coding	1.7229	3.301	0.000127747	0.00399381	5.95509	4.23219	17.772	18.4084	17.22	59.5855	53.7686	70.959
ENSRNOG00000022792	Lamp3	chr11:84972132-85000681	+	protein_coding	0.696684	1.62078	0.00391496	0.0195117	8.1268	7.43012	159.842	195.392	161.382	299.026	254.245	284.178
ENSRNOG00000022800	Sp140	chr9:92618352-92665430	+	protein_coding	2.1321	4.38356	0.000406601	0.00632776	6.02322	3.89112	14.8313	12.9589	13.7795	77.5385	68.281	49.561
ENSRNOG00000022838	Cnksr1	chr5:152446845-152458023	-	protein_coding	1.94428	3.84845	0.00262613	0.0156974	4.11735	2.17307	3.94165	3.36345	3.25381	24.4454	14.5144	12.2432
ENSRNOG00000022839	Ifit3	chr1:252906234-252911382	+	protein_coding	6.37559	83.0315	0.0105654	0.0351206	9.15845	2.78286	0	17.3933	16.7221	582.898	724.021	439.775
ENSRNOG00000022859	Trem1	chr9:14727976-14809447	-	protein_coding	1.21033	2.31391	0.00195729	0.0133272	3.58955	2.37922	4.56873	4.0768	3.98087	8.86745	13.487	11.2041
ENSRNOG00000023013	March3	chr18:51844976-52017734	-	protein_coding	2.58638	6.00591	7.87961e-06	0.00244591	3.99265	1.40627	1.65862	1.65377	1.63917	13.3855	16.7486	14.7991
ENSRNOG00000023257	Adamts9	chr4:124660262-124858250	-	protein_coding	1.82518	3.54351	0.00550862	0.0238074	4.80921	2.98403	7.61096	6.96089	6.2249	31.6272	36.6151	16.9558
ENSRNOG00000023258	Nfkb1	chr2:240773456-240866689	-	protein_coding	1.16155	2.23698	0.0243578	0.0606983	6.29742	5.13587	32.7217	34.5895	35.2175	96.8505	98.6246	48.9124
ENSRNOG00000023334	Parp14	chr11:68105369-68137535	+	protein_coding	2.64194	6.24171	2.90002e-05	0.0027263	7.55772	4.91578	29.5676	30.8211	27.2759	170.48	219.38	175.977
ENSRNOG00000023376	Riok3	chr18:3565166-3590739	+	protein_coding	1.66044	3.16112	0.000411483	0.00637842	6.04317	4.38274	19.7946	20.3335	19.4641	77.9819	65.2488	53.8053
ENSRNOG00000023397	Ly6c	chr14:22868515-22890958	-	protein_coding	1.40413	2.64658	0.000153674	0.00422966	8.55968	7.15555	153.411	131.31	140.851	376.842	412.807	342.598
ENSRNOG00000023400	Dtx3l	chr11:67757928-67767622	+	protein_coding	2.17444	4.51411	5.24496e-06	0.00231144	5.7123	3.53786	11.3405	10.7157	9.8369	53.8971	49.0732	51.4286
ENSRNOG00000023428	Pik3r5	chr10:55013703-55080421	+	protein_coding	1.25387	2.3848	0.0217712	0.0561977	4.08151	2.82764	5.66189	8.03946	4.94114	21.3271	18.0458	10.4113
ENSRNOG00000023463	Parp9	chr11:67724076-67756799	-	protein_coding	2.68583	6.43451	4.85095e-05	0.00312011	7.8677	5.18187	39.6382	37.3269	29.7082	245.633	244.259	209.651
ENSRNOG00000023614	Hsh2d	chr16:19336271-19349080	-	protein_coding	2.00031	4.00087	0.0036134	0.0185848	4.61076	2.61045	6.45366	4.17016	4.91011	32.5555	24.7332	15.8917
ENSRNOG00000023628	Tmem106a	chr10:89484468-89493283	+	protein_coding	3.68218	12.8365	0.00032462	0.00569057	6.07655	2.39438	5.86899	4.23725	3.03963	87.5308	67.262	49.863
ENSRNOG00000023698	Tex14	chr10:74724549-74849194	+	protein_coding	0.96066	1.9462	0.00145295	0.0115199	1.11057	0.149913	0.142157	0.088132	0.09895	0.85384	1.19251	1.47705
ENSRNOG00000023799	Pak1ip1	chr17:21580087-21591203	-	protein_coding	2.0365	4.10248	0.0058838	0.0247235	4.52499	2.48849	4.00147	5.76388	4.22442	31.4348	25.3598	13.2731
ENSRNOG00000023850	Tbrg1	chr8:40114792-40122450	-	protein_coding	1.09907	2.14217	0.00380954	0.0191108	6.19195	5.09288	29.7753	40.4076	30.192	82.9763	62.391	72.4011
ENSRNOG00000023923	Fastkd2	chr9:70450444-70470550	+	protein_coding	0.748665	1.68024	0.00361381	0.0185848	2.90841	2.15974	3.5591	3.70246	3.1614	6.9683	7.23346	5.4507
ENSRNOG00000023941	Fam178b	chr9:43179795-43251400	-	protein_coding	0.61655	1.5332	7.48988e-05	0.0034912	0.745278	0.128728	0.088506	0.049273	0.144284	0.661157	0.680525	0.687319
ENSRNOG00000023943	Gbp1	chr2:248398917-248409570	+	protein_coding	2.99058	7.94793	0.00424733	0.0204195	4.48449	1.49391	2.39729	2.01728	1.17966	13.892	16.5742	41.8615
ENSRNOG00000023951	Tbc1d30	chr7:63361696-63407241	-	protein_coding	1.02408	2.03366	0.00109103	0.0100551	2.6317	1.60762	1.77314	2.1694	2.22017	6.09943	4.95224	4.63325
ENSRNOG00000023969	Herc6	chr4:88607518-88649216	-	protein_coding	3.34181	10.1388	2.99528e-05	0.00275242	8.50117	5.15936	42.016	34.0357	29.2847	340.727	353.614	391.539
ENSRNOG00000023991	Rab20	chr16:83358116-83382326	+	protein_coding	1.88399	3.69095	0.0024556	0.0151449	5.37546	3.49147	9.20416	12.6224	9.23477	54.3998	40.5289	30.0932
ENSRNOG00000024159	Fcer1g	chr13:89601896-89606326	-	protein_coding	1.47658	2.78288	0.0118541	0.0378555	7.03649	5.55992	45.115	43.1385	50.5757	100.935	106.059	206.319
ENSRNOG00000024177	AC096601.1	chr7:123088187-123088819	-	protein_coding	1.30152	2.46488	0.0223105	0.0570832	1.6353	0.333787	0.133138	0.238162	0.426854	1.14126	1.87898	3.86315
ENSRNOG00000024186	Eef1b2	chr9:69953440-69956160	+	protein_coding	0.756226	1.68907	0.000602439	0.00745791	7.9001	7.14387	141.843	140.942	138.505	263.192	232.58	219.873
ENSRNOG00000024312	Xkr8	chr5:150918603-150925727	-	protein_coding	0.681051	1.60331	0.00123579	0.010704	2.51607	1.83502	2.56132	2.60087	2.54135	5.34087	4.68439	4.19285
ENSRNOG00000024346	Plet1	chr8:54925607-54937177	+	protein_coding	2.30814	4.95245	0.00908535	0.0320855	6.31517	4.00703	14.934	19.4625	11.7474	57.9763	56.9333	146.762
ENSRNOG00000024363	Sertad1	chr1:84293102-84296367	+	protein_coding	1.10837	2.15602	0.00159825	0.0120709	1.99166	0.88329	1.14028	0.636046	0.79236	2.6753	3.50397	2.79978
ENSRNOG00000024382	Fcgr3a	chr13:89385859-89396051	+	protein_coding	0.806667	1.74917	0.0279636	0.0665371	5.13598	4.32931	25.5006	15.1985	17.9246	38.3245	35.6986	29.1258
ENSRNOG00000024390	Osm	chr14:84465515-84470409	+	protein_coding	2.48577	5.60135	0.000876495	0.00890766	3.01778	0.532006	0.427482	0.625	0.303243	10.2517	6.88129	4.99119
ENSRNOG00000024426	Mro	chr18:69841053-69849389	+	protein_coding	0.751537	1.68359	0.00207597	0.0137539	1.07983	0.328292	0.249481	0.320433	0.199586	1.41697	0.94042	1.0138
ENSRNOG00000024492	Ap1ar	chr2:232147690-232178671	-	protein_coding	0.841679	1.79213	0.000148318	0.00421193	4.23789	3.39621	9.54898	8.89444	10.1811	18.6254	17.8027	17.2037
ENSRNOG00000024506	LOC500475	chr5:78384444-78409050	+	protein_coding	1.25041	2.37908	0.0117086	0.037531	1.97835	0.727941	0.849642	0.649745	0.48899	4.16854	3.29814	1.75408
ENSRNOG00000024605	Fam220a	chr12:13043038-13067341	-	protein_coding	1.03303	2.04632	0.000405162	0.00631541	1.03304	4.80898e-07	0	1e-06	0	1.19575	1.17512	0.794143
ENSRNOG00000024632	Atf6	chr13:89055983-89242443	-	protein_coding	0.666202	1.58689	0.0203011	0.0536214	4.04149	3.37529	7.99196	8.90136	11.5499	13.1942	16.7799	16.6926
ENSRNOG00000024640	Oacyl	chr18:61377051-61432878	+	protein_coding	0.741691	1.67213	0.00540507	0.0235745	0.998469	0.256778	0.14358	0.275159	0.169668	0.685966	1.2609	1.09207
ENSRNOG00000024661	Hn1l	chr10:14304104-14324211	-	protein_coding	2.05995	4.16973	0.0365823	0.08078	5.12605	3.06609	10.2711	14.3999	2.38432	34.2881	32.9966	34.499
ENSRNOG00000024688	Fam132b	chr9:98505259-98511160	+	protein_coding	0.618466	1.53524	0.0012629	0.0108037	0.747714	0.129248	0.117553	0.08258	0.081421	0.516365	0.795556	0.738804
ENSRNOG00000024705	Rarres2	chr4:78205812-78208767	-	protein_coding	1.17155	2.25253	0.0123932	0.0388269	7.57725	6.40571	76.089	99.6485	77.547	147.89	177.398	261.232
ENSRNOG00000024848	Fga	chr2:182006242-182013763	+	protein_coding	1.82775	3.54983	0.0250568	0.0617734	1.8421	0.0143567	0.030304	0	0	5.77258	2.52698	0.929429
ENSRNOG00000024952	Atp8b1	chr18:60013382-60095354	-	protein_coding	1.04597	2.06475	0.000748114	0.00826734	3.25497	2.209	3.29858	3.62759	3.96875	8.97049	9.40465	7.38663
ENSRNOG00000025037	Ankk1	chr8:53751091-53758774	-	protein_coding	1.19947	2.29656	0.00406792	0.0199393	1.21713	0.0176565	0.037398	0	0	1.3095	1.97145	0.831011
ENSRNOG00000025052	Stard5	chr1:145770135-145780001	+	protein_coding	1.31237	2.4835	0.0107381	0.0354677	4.01123	2.69886	5.46523	6.18073	4.89604	22.1982	14.0743	10.9899
ENSRNOG00000025074	Fgg	chr2:181987217-181994514	+	protein_coding	3.66016	12.642	0.00138108	0.0112126	8.80012	5.13996	31.0481	48.95	26.385	617.964	541.903	262.58
ENSRNOG00000025100	Ikbke	chr13:48031410-48056394	-	protein_coding	0.877547	1.83725	0.0132895	0.0404906	4.11749	3.23995	7.74529	9.13358	8.51536	14.5207	13.7795	21.7979
ENSRNOG00000025111	Nfkbid	chr1:88885937-88892615	+	protein_coding	1.46108	2.75314	0.00156003	0.0119533	2.45864	0.997567	1.48435	0.996626	0.604658	4.09985	4.82777	4.58878
ENSRNOG00000025117	Noxo1	chr10:14062331-14066918	+	protein_coding	4.53766	23.2259	0.000120588	0.00389714	6.24831	1.71065	2.326	2.93832	1.67693	84.4073	95.3979	52.361
ENSRNOG00000025130	Ltk	chr3:111553680-111560556	-	protein_coding	2.35652	5.12134	0.0029953	0.0168775	2.90705	0.550529	0.296493	1.1072	0.150007	8.03937	7.80301	4.30346
ENSRNOG00000025164	Bhlha15	chr12:12403385-12407561	-	protein_coding	1.42804	2.69082	0.000549272	0.00717705	2.30676	0.878718	1.1278	0.840043	0.587825	4.4396	3.58014	3.86148
ENSRNOG00000025167	Sema4b	chr1:141986145-142014398	+	protein_coding	1.47731	2.78429	0.00413406	0.020121	3.2928	1.81549	2.30966	2.52889	2.73363	12.6389	7.90688	6.74808
ENSRNOG00000025185	Nup188	chr3:8873933-8908438	+	protein_coding	0.997961	1.99717	0.000259581	0.00520534	4.20966	3.2117	8.05386	8.26535	8.47886	19.6605	16.5189	16.5005
ENSRNOG00000025216	LOC100912458	chr1:88766872-88772242	+	protein_coding	0.683819	1.60639	0.00555117	0.0239486	3.01175	2.32793	4.46044	4.06854	3.57322	7.55159	6.01064	7.7514
ENSRNOG00000025245	RGD1311946	chr1:218945508-218954280	+	protein_coding	0.681816	1.60416	0.00280288	0.0162141	2.49501	1.8132	2.83874	2.46472	2.26304	5.28406	4.3475	4.33125
ENSRNOG00000025365	Ido2	chr16:72268943-72289156	+	protein_coding	0.62451	1.54169	0.00182102	0.0129231	0.679008	0.0544979	0.077795	0	0.039155	0.540895	0.493263	0.783593
ENSRNOG00000025388	Mrpl33	chr6:26130488-26138414	-	protein_coding	0.664448	1.58496	0.0107075	0.0353982	5.71376	5.04931	35.8103	34.5344	26.7564	56.701	50.5148	47.6322
ENSRNOG00000025424	Yrdc	chr5:142845114-142850111	+	protein_coding	0.790745	1.72997	0.00662094	0.0264674	4.22823	3.43749	10.1908	9.67969	9.63993	21.9437	16.7451	15.1708
ENSRNOG00000025430	Ddx18	chr13:37522561-37536066	-	protein_coding	0.76288	1.69687	0.00304306	0.0170196	4.45052	3.68764	10.7034	12.3589	12.6832	23.6024	20.7506	18.533
ENSRNOG00000025484	Tmem177	chr13:35929819-35933243	-	protein_coding	1.36565	2.57693	0.00103144	0.00973059	1.37931	0.0136563	0.015691	0	0.012911	2.23811	1.40009	1.26529
ENSRNOG00000025592	Tspan31	chr7:70352251-70355619	-	protein_coding	0.599033	1.5147	0.00183938	0.0129855	5.58194	4.98291	32.6922	31.8131	27.6046	44.6007	48.5261	47.6617
ENSRNOG00000025701	Nifk	chr13:34267471-34277530	+	protein_coding	0.920348	1.89257	0.0031925	0.0174806	3.63896	2.71861	5.70278	5.51144	5.53453	12.42	13.1067	9.21237
ENSRNOG00000025711	LOC499770	chr3:8743882-8751324	-	protein_coding	1.17435	2.25691	0.00115545	0.0103535	4.21863	3.04428	7.78178	7.51133	6.51071	18.6401	19.8757	14.7404
ENSRNOG00000025764	AC128848.1	chr19:11302125-11302938	-	protein_coding	7.57484	190.658	0.00371373	0.0188381	8.77971	1.20487	0.014493	11.0741	0	661.145	456.185	279.429
ENSRNOG00000025890	Opa3	chr1:80141630-80160145	+	protein_coding	0.7049	1.63003	0.00225073	0.0144132	0.714169	0.00926886	0.019461	0	0	0.584353	0.877373	0.484417
ENSRNOG00000025930	Chst13	chr4:122224535-122237754	-	protein_coding	0.59692	1.51248	0.0455495	0.0951899	0.766981	0.170062	0.228755	0.114784	0.039741	0.507098	0.464939	1.23199
ENSRNOG00000025998	Aim1	chr20:48927914-48969499	-	protein_coding	1.67794	3.19971	0.000324222	0.00569057	4.45873	2.78079	5.85812	6.20762	5.56613	25.6946	18.6739	19.2452
ENSRNOG00000026023	Taf4b	chr18:6207280-6318219	+	protein_coding	1.06107	2.08648	0.00703951	0.0274742	2.32991	1.26884	1.2149	1.55285	1.47457	5.22804	4.25245	2.88516
ENSRNOG00000026109	Prmt1	chr1:100971273-100980340	-	protein_coding	0.797068	1.73757	0.000174802	0.0044521	5.76388	4.96681	32.6866	29.5082	28.758	53.6258	51.7701	54.6566
ENSRNOG00000026235	Hk3	chr17:10137974-10152956	+	protein_coding	1.46522	2.76105	0.00912397	0.0321673	3.48069	2.01547	2.26366	4.76906	2.51024	9.84086	12.8955	8.23498
ENSRNOG00000026236	Morc3	chr11:34051993-34094698	+	protein_coding	0.643573	1.56219	0.00823037	0.0302029	5.13889	4.49532	24.1942	22.8154	18.1212	36.3901	34.4608	31.9894
ENSRNOG00000026316	Wdr43	chr6:23433532-23473169	-	protein_coding	1.52612	2.88009	0.00264859	0.0157893	4.95249	3.42637	8.1727	9.80397	11.5383	38.9251	27.7775	24.8369
ENSRNOG00000026592	Rhbdl2	chr5:141491223-141507892	+	protein_coding	2.64406	6.25089	0.00499973	0.0225181	2.90151	0.257447	0.300494	0.212727	0.082994	8.47519	10.1648	2.94354
ENSRNOG00000026605	Ifi27l2b	chr6:127336305-127337791	-	protein_coding	1.47827	2.78614	0.0154373	0.0444035	8.60601	7.12775	140.561	200.659	94.8154	431.581	298.12	456.187
ENSRNOG00000026647	Cxcl16	chr10:57060007-57064600	-	protein_coding	1.69192	3.23085	0.0332958	0.0754004	6.87978	5.18786	51.4072	50.8335	16.828	98.2643	130.311	124.303
ENSRNOG00000026650	Tmprss4	chr8:49469503-49502647	-	protein_coding	1.49787	2.82425	0.0314927	0.0724107	3.35345	1.85558	1.87321	4.23606	2.15052	15.3186	5.65165	8.83673
ENSRNOG00000026805	Csf2	chr10:39602089-39604070	-	protein_coding	2.56854	5.93209	1.09565e-05	0.00251647	4.44464	1.8761	2.93639	2.7455	2.35492	22.4472	19.0419	20.9728
ENSRNOG00000026813	AABR07044933.1	chr20:27129291-27129806	+	protein_coding	0.721425	1.64881	0.0104706	0.0349181	2.93979	2.21837	4.49913	3.13246	3.43488	5.68813	7.27119	7.16627
ENSRNOG00000026962	Osbpl8	chr7:53878610-54027892	+	protein_coding	1.61407	3.06114	0.000450467	0.00660075	5.4436	3.82953	14.2358	14.894	10.8662	47.3221	41.0666	39.5486
ENSRNOG00000026965	Tmem140	chr4:62380914-62391912	+	protein_coding	2.06504	4.18445	0.00163485	0.0121802	2.95012	0.88508	0.267768	1.16341	1.29683	6.58514	6.76537	6.83603
ENSRNOG00000027008	Igtp	chr10:43613931-43653390	+	protein_coding	3.46008	11.0049	1.68904e-05	0.00253197	7.21668	3.7566	13.5149	10.9337	13.2546	132.262	171.179	142.425
ENSRNOG00000027024	Rgs16	chr13:71179910-71185216	+	protein_coding	3.8068	13.9946	6.30017e-05	0.00335624	6.49739	2.69059	5.97539	4.6931	5.77527	117.658	79.8309	75.8871
ENSRNOG00000027030	Adm	chr1:175445088-175447259	+	protein_coding	2.10513	4.30237	0.0136734	0.0411595	4.00385	1.89872	1.13633	4.5744	3.3536	12.4876	11.9356	22.6655
ENSRNOG00000027037	Alox12	chr10:56851734-56864005	-	protein_coding	1.10965	2.15793	0.000639173	0.00773336	3.07481	1.96516	2.66286	2.74075	3.34443	7.98324	7.88445	6.49484
ENSRNOG00000027225	Ly6g6f	chr20:5071062-5076586	-	protein_coding	1.71796	3.28972	9.97884e-05	0.00377923	2.39031	0.672343	0.792196	0.557208	0.450288	4.45009	4.51302	3.79589
ENSRNOG00000027257	Gmip	chr16:21349652-21362955	-	protein_coding	0.711626	1.63765	0.00508249	0.0227075	3.63018	2.91855	7.1579	6.70254	5.87868	12.3196	12.3193	9.70058
ENSRNOG00000027376	Il17rc	chr4:145427367-145439843	+	protein_coding	0.969989	1.95883	0.00041175	0.00637842	3.83892	2.86893	7.06168	6.08243	5.82808	14.3269	13.1062	12.5528
ENSRNOG00000027502	Nmi	chr3:37458890-37480984	-	protein_coding	0.998552	1.99799	0.00937769	0.032658	5.85846	4.85991	25.5411	30.4085	28.3745	43.0905	62.9259	68.294
ENSRNOG00000027552	Tapbpl	chr4:157735748-157743199	-	protein_coding	1.52753	2.88292	0.000217606	0.00480219	5.6859	4.15837	16.9906	14.9049	18.898	49.9477	55.5887	46.3184
ENSRNOG00000027655	Clec4b2	chr4:156107620-156131583	+	protein_coding	1.52882	2.8855	0.00614955	0.0253611	1.83678	0.307961	0.111669	0.435583	0.188811	2.09743	4.15904	1.8524
ENSRNOG00000027811	Lilrb4	chr1:73393850-73399579	-	protein_coding	2.50916	5.69289	0.000230856	0.00492811	6.15885	3.64969	12.2619	13.6696	9.16185	59.8461	72.9206	80.0954
ENSRNOG00000027901	Mrm1	chr10:72136246-72142533	-	protein_coding	0.73313	1.66224	0.00396511	0.0196277	2.46741	1.73428	2.75032	2.11304	2.1547	5.17929	4.0181	4.45527
ENSRNOG00000028015	Pf4	chr14:18848549-18849258	-	protein_coding	2.35637	5.12079	0.00200993	0.0135703	6.54513	4.18876	24.2694	11.1325	18.7826	91.7021	105.518	81.476
ENSRNOG00000028043	Cxcl3	chr14:18820168-18839595	-	protein_coding	1.50823	2.8446	0.014194	0.0420929	8.56712	7.05889	114.12	147.842	137.337	602.369	332.449	270.185
ENSRNOG00000028089	Apobec4	chr13:70157522-70165568	+	protein_coding	0.715362	1.6419	0.00424244	0.0204095	0.911908	0.196545	0.130054	0	0.331677	0.819315	0.914688	0.91218
ENSRNOG00000028103	Psmd3	chr10:86599220-86611188	+	protein_coding	0.676838	1.59863	0.00645466	0.0261477	5.80713	5.13029	33.8018	37.0213	31.4702	63.0035	55.0516	47.9291
ENSRNOG00000028113	Whamm	chr1:143401986-143430356	+	protein_coding	1.05253	2.07416	0.0161843	0.045854	4.04179	2.98926	7.25312	7.05387	6.53272	19.3931	10.5038	18.0447
ENSRNOG00000028255	Usp36	chr10:107292828-107324355	-	protein_coding	1.03116	2.04367	0.00367404	0.0187282	4.08882	3.05766	7.76849	6.68539	7.56546	20.1583	13.8448	14.6862
ENSRNOG00000028259	Mcemp1	chr12:2213471-2217433	+	protein_coding	1.06444	2.09136	0.0197331	0.052521	4.92342	3.85898	17.4393	15.2884	9.17138	25.3966	30.0179	33.1292
ENSRNOG00000028377	Mpl	chr5:137269504-137281298	-	protein_coding	0.666356	1.58706	0.0173602	0.0481721	1.12288	0.456522	0.467316	0.270275	0.386307	0.80963	1.15315	1.65092
ENSRNOG00000028461	Gnl3	chr16:7097507-7103604	-	protein_coding	1.63265	3.10082	0.00472927	0.0217565	5.74514	4.11249	19.9493	14.1372	15.3207	70.6332	53.7336	38.3563
ENSRNOG00000028477	Med8	chr5:137243094-137243978	+	protein_coding	0.811926	1.75555	0.0222723	0.0570598	3.01312	2.20119	4.17812	4.29822	2.54463	7.42697	8.10212	5.85963
ENSRNOG00000028638	Il10rb	chr11:31560530-31582457	+	protein_coding	1.56739	2.96368	0.00038078	0.00612576	6.51151	4.94412	31.0875	29.5943	28.717	108.176	87.3356	77.7434
ENSRNOG00000028668	LOC691960	chr3:114355798-114647382	+	protein_coding	1.32629	2.50756	0.00793503	0.0295747	4.587	3.26071	10.5854	8.59485	6.92072	30.2138	23.0617	17.4841
ENSRNOG00000028711	Dgat1	chr7:117566368-117576737	-	protein_coding	0.60092	1.51668	0.00123884	0.010704	3.71498	3.11406	7.29077	8.30304	7.41509	11.216	12.6561	12.574
ENSRNOG00000028733	Prkar1b	chr12:17614632-17712373	+	protein_coding	0.653369	1.57284	0.0240301	0.0601244	0.895006	0.241637	0.011436	0.416239	0.153838	0.848307	0.617504	1.15105
ENSRNOG00000028768	Gbp4	chr2:248249468-248263168	+	protein_coding	3.00112	8.00624	1.40213e-05	0.00253197	5.44817	2.44704	5.18731	4.49501	3.76903	40.2678	44.9978	42.8365
ENSRNOG00000028801	Gsap	chr4:10423139-10517848	-	protein_coding	1.89395	3.7165	0.00138994	0.0112407	5.77769	3.88374	16.5195	14.3309	10.9751	65.1261	56.4471	42.4644
ENSRNOG00000028814	Oasl2	chr12:47469598-47482961	-	protein_coding	3.2517	9.52487	7.43423e-05	0.00348761	7.50429	4.25259	20.9736	16.7333	16.7739	225.877	154.52	168.619
ENSRNOG00000028822	Bex3	chrX:106823491-106825014	+	protein_coding	0.687882	1.61092	0.00391383	0.0195117	4.94072	4.25283	17.7604	19.0198	17.4498	34.1956	29.3684	26.1019
ENSRNOG00000028895	Rtp4	chr11:80638945-80650802	-	protein_coding	1.74388	3.34936	0.000392624	0.00624036	6.97269	5.2288	37.7115	41.5487	31.0151	133.103	134.769	107.824
ENSRNOG00000028930	Dab2	chr2:55747318-55768270	+	protein_coding	0.676796	1.59859	0.02576	0.0629626	6.51288	5.83608	53.4521	66.206	49.9429	104.937	95.8262	73.2464
ENSRNOG00000029001	RT1-S2	chr20:3155652-3157088	+	protein_coding	0.70123	1.62589	0.000854215	0.00880429	0.776551	0.075321	0.0734161	0.0895659	0	0.707482	0.862141	0.58098
ENSRNOG00000029127	Parp16	chr8:70708873-70729985	+	protein_coding	1.62692	3.08853	0.0126275	0.0392563	3.80395	2.17703	3.6789	4.02315	2.93488	20.7784	12.7419	8.10402
ENSRNOG00000029191	LOC685067	chr2:248219428-248239899	+	protein_coding	3.25259	9.53074	1.369e-06	0.00181512	7.84514	4.59255	21.6374	23.783	24.0324	212.468	239.809	235.514
ENSRNOG00000029195	Uba7	chr8:116754178-116764126	+	protein_coding	2.2001	4.59512	8.56228e-05	0.00363468	5.13069	2.93059	6.90811	7.26757	5.77857	39.2997	30.5867	32.781
ENSRNOG00000029212	Vcan	chr2:18490102-18565842	-	protein_coding	0.924184	1.89761	0.0467415	0.0967935	2.61003	1.68584	1.76917	3.97264	1.41841	5.23953	5.49142	4.61819
ENSRNOG00000029220	Zmym5	chr15:37042396-37056892	-	protein_coding	0.817688	1.76258	0.000401149	0.00629896	5.54693	4.72924	25.9114	24.9831	25.6873	50.0537	45.7583	41.8048
ENSRNOG00000029316	Gtf2f2	chr15:57942059-58068892	-	protein_coding	1.38583	2.61323	0.00523324	0.0230907	3.55828	2.17245	3.19567	3.56819	3.77937	13.6235	12.2567	7.43257
ENSRNOG00000029500	Tapbp	chr20:5468078-5476193	-	protein_coding	2.07183	4.20418	0.000230896	0.00492811	7.24073	5.1689	38.8304	37.0915	29.6859	128.19	157.306	168.162
ENSRNOG00000029508	Slpil2	chr3:160736675-160739137	-	protein_coding	1.89958	3.73103	0.000188561	0.00458065	1.97501	0.0754315	0.123467	0	0.041265	2.4248	3.69852	2.77584
ENSRNOG00000029529	LOC102551435	chr11:83977664-83985385	-	protein_coding	2.2328	4.70046	0.00505062	0.0226463	3.21822	0.985421	1.10531	0.677361	1.19777	13.6517	8.37825	4.86591
ENSRNOG00000029543	Cish	chr8:116054465-116060723	+	protein_coding	2.55633	5.88211	0.00195719	0.0133272	5.10944	2.55311	4.64465	5.82446	4.24785	47.7967	37.0264	21.1723
ENSRNOG00000029592	Srsf11	chr2:264837472-264864265	-	protein_coding	0.704961	1.6301	0.0203483	0.0536964	6.08273	5.37777	45.9885	38.208	38.0159	84.4061	60.3425	58.4293
ENSRNOG00000029658	Rnf213	chr10:108527740-108624688	+	protein_coding	2.80925	7.00922	2.11515e-06	0.00203157	6.95355	4.1443	17.7816	16.5059	15.8172	115.144	129.848	124.291
ENSRNOG00000029668	Wfdc21	chr10:71047310-71053191	+	protein_coding	2.79949	6.96192	0.0145854	0.0428191	3.92946	1.12997	1.91966	1.46375	0.45726	30.1236	14.7204	6.22935
ENSRNOG00000029682	Clic1	chr20:5040337-5049166	+	protein_coding	0.637584	1.55572	0.0225883	0.0575109	7.12821	6.49062	101.814	73.231	94.2747	123.13	158.668	137.14
ENSRNOG00000029768	Ccl12	chr10:69476775-69478462	+	protein_coding	3.18144	9.07213	0.0329425	0.0747982	3.93077	0.749324	0.642544	1.25151	0.28445	3.21959	19.8538	39.3068
ENSRNOG00000029886	Hba-a1	chr10:15602794-15603649	-	protein_coding	0.70958	1.63533	0.035353	0.0786755	12.3715	11.6619	3480.04	2482.48	3934.57	4981.18	4841.58	6166.34
ENSRNOG00000030019	Atp1a1	chr2:204003742-204032023	-	protein_coding	1.15452	2.22611	0.000112164	0.00385899	8.19014	7.03562	129.238	141.305	120.855	301.26	297.386	275.235
ENSRNOG00000030021	Ccl6	chr10:70797124-70802782	-	protein_coding	0.6844	1.60703	0.0423782	0.0901931	6.67362	5.98922	74.0284	71.1581	46.3474	108.394	107.624	88.5287
ENSRNOG00000030027	Fbxw17	chr17:15076884-15094805	-	protein_coding	0.993644	1.99121	0.00118972	0.0104798	3.81962	2.82598	6.2723	5.96307	6.04113	14.5885	10.9811	14.0717
ENSRNOG00000030049	Znhit6	chr2:251453644-251484759	+	protein_coding	0.751244	1.68324	0.00153828	0.011888	3.65907	2.90783	7.52136	6.09659	5.98991	12.1236	11.6761	11.1181
ENSRNOG00000030467	Ube2l6	chr3:72191533-72206188	+	protein_coding	0.736292	1.66589	0.0137207	0.0412104	3.05765	2.32136	4.09953	4.40078	3.53322	5.74111	7.76585	8.76799
ENSRNOG00000030628	Eif4a1	chr10:56271257-56276764	-	protein_coding	1.21377	2.31943	0.00256197	0.0154922	8.29539	7.08162	128.468	164.774	114.787	344.046	324.523	275.073
ENSRNOG00000030888	Rela	chr1:220992770-221003249	+	protein_coding	1.20855	2.31105	0.00488035	0.0221805	5.4076	4.19905	16.7167	16.1141	19.4352	53.7004	32.9685	40.1603
ENSRNOG00000030930	Samsn1	chr11:14253848-14304725	-	protein_coding	1.48356	2.79637	8.74697e-05	0.00363468	4.46072	2.97716	7.06994	6.0449	7.58814	20.2628	22.1605	20.6801
ENSRNOG00000030981	Scnn1b	chr1:191829555-191884298	+	protein_coding	1.02096	2.02927	0.036457	0.0805521	4.81542	3.79447	10.1527	15.1776	13.8064	37.2523	29.1331	18.3669
ENSRNOG00000031022	Rpl36al	chr18:1504178-1505570	+	protein_coding	0.629894	1.54745	0.00353648	0.0183959	8.07287	7.44298	179.746	168.072	171.402	302.416	267.478	238.654
ENSRNOG00000031081	Stat2	chr7:2691369-2707741	+	protein_coding	2.11484	4.33142	4.43134e-06	0.00229601	6.54563	4.43079	21.7831	21.1842	18.8494	90.8731	93.2962	93.105
ENSRNOG00000031090	RT1-CE7	chr20:4694472-4896970	-	protein_coding	1.93729	3.82986	0.000525085	0.00701766	6.71488	4.77759	31.8646	26.0661	22.1973	98.5951	92.7785	123.108
ENSRNOG00000031138	Irgm	chr10:34213936-34221928	-	protein_coding	2.63364	6.20588	0.0459275	0.0957186	5.66037	3.02673	5.16031	4.62799	14.6119	36.4577	145.6	22.5585
ENSRNOG00000031163	Nfkbiz	chr11:47243342-47271487	+	protein_coding	2.97544	7.86499	0.000116669	0.00389319	5.06824	2.0928	4.0766	3.18071	2.65731	38.6797	32.8849	27.0869
ENSRNOG00000031171	Wdr46	chr20:5447860-5455632	-	protein_coding	1.29647	2.45626	0.00123947	0.010704	3.98309	2.68663	5.21599	5.51357	5.59077	18.5033	12.5287	13.9874
ENSRNOG00000031189	Ido1	chr16:72216326-72228098	+	protein_coding	3.44977	10.9265	2.55942e-05	0.00263992	3.44977	0	0	0	0	8.84526	8.75107	12.5884
ENSRNOG00000031202	Trim30c	chr1:169491920-169513537	-	protein_coding	1.1157	2.167	0.0108645	0.0356968	2.31689	1.20119	1.4559	1.20182	1.24799	5.6823	3.97036	2.72433
ENSRNOG00000031203	Scfd1	chr6:72124417-72202713	+	protein_coding	0.87068	1.82852	0.000584869	0.00738988	5.43811	4.56743	20.5307	25.289	22.5489	40.8658	42.4457	43.8023
ENSRNOG00000031312	Tnfrsf1a	chr4:157864969-157877633	+	protein_coding	1.07547	2.10741	0.000120126	0.00389714	5.73536	4.65989	25.6872	24.746	22.5121	52.3504	55.3882	49.2602
ENSRNOG00000031368	LOC499235	chr1:171993857-171997902	-	protein_coding	0.93768	1.91545	0.00154729	0.011906	3.80533	2.86765	7.05612	5.32359	6.63225	13.9787	13.0873	11.9494
ENSRNOG00000031421	Eif1a	chr18:40586315-40597671	+	protein_coding	1.26229	2.39876	0.0216913	0.0560397	2.87405	1.61176	2.42577	2.17315	1.6261	10.0293	4.05359	6.06927
ENSRNOG00000031544	Larp1	chr10:43446526-43498066	+	protein_coding	1.27724	2.42374	6.88212e-05	0.00339194	5.91795	4.64071	26.3054	21.8976	23.828	59.9303	60.1772	58.2948
ENSRNOG00000031607	RT1-CE3	chr20:4931965-4935372	-	protein_coding	1.24005	2.36207	0.000617069	0.0075662	4.7803	3.54025	10.2292	11.5263	10.1941	25.9916	23.164	30.8158
ENSRNOG00000031656	Ccnh	chr2:13593100-13613910	+	protein_coding	1.12075	2.1746	0.0238163	0.0597275	5.17287	4.05213	16.9338	15.317	14.5999	50.3393	36.4071	23.4437
ENSRNOG00000031689	Trim15	chr20:2194709-2201668	+	protein_coding	0.95135	1.93368	0.00108651	0.0100389	1.69027	0.738918	0.459588	0.799407	0.769904	2.21902	2.01428	2.46383
ENSRNOG00000031743	Gbp2	chr2:248276709-248293784	+	protein_coding	4.44645	21.8029	6.73669e-05	0.00339194	9.5418	5.09535	44.7366	29.0882	28.0334	612.327	875.657	769.158
ENSRNOG00000031789	Rangap1	chr7:122940376-122967178	-	protein_coding	0.783093	1.72082	0.000648352	0.00778463	4.1224	3.3393	9.17929	9.48974	8.7098	18.294	15.3521	15.7456
ENSRNOG00000032240	Gbp5	chr2:248178389-248197160	+	protein_coding	4.00377	16.0419	0.000236539	0.0049639	7.67829	3.67452	11.8762	10.6421	12.8868	179.155	311.348	151.722
ENSRNOG00000032728	LOC689230	chr11:67329657-67337948	+	protein_coding	1.44013	2.71346	0.000186829	0.00458065	1.66391	0.223782	0.344566	0.056277	0.121336	2.15231	2.28811	2.06965
ENSRNOG00000032917	Zfand2a	chr12:17252093-17263477	+	protein_coding	1.7354	3.32972	0.00831828	0.0303418	4.5639	2.8285	6.13703	9.40451	3.82672	25.2761	25.5647	17.956
ENSRNOG00000032991	Rufy4	chr9:81402124-81421990	+	protein_coding	0.861626	1.81708	0.00679348	0.0268691	1.44322	0.581592	0.576883	0.637051	0.298279	1.5148	1.451	2.26218
ENSRNOG00000033192	Osmr	chr2:56110777-56151531	-	protein_coding	3.55142	11.7242	9.06024e-06	0.00245108	6.13614	2.58472	4.42385	5.742	4.90391	71.2125	75.6693	61.8431
ENSRNOG00000033217	Esam	chr8:39997875-40008809	+	protein_coding	0.947878	1.92903	0.00798786	0.0296789	6.41114	5.46326	44.8478	38.7349	46.1335	98.194	92.1066	65.738
ENSRNOG00000033220	Oas1f	chr12:41227825-41307352	-	protein_coding	1.79935	3.48064	0.000931798	0.00920147	4.50108	2.70173	6.25122	6.29359	4.20654	23.8075	23.6657	17.9759
ENSRNOG00000033235	Relb	chr1:80517411-80544825	-	protein_coding	2.79527	6.94161	7.46547e-06	0.00244591	5.04229	2.24702	4.3123	3.49094	3.48372	31.6445	33.986	30.3282
ENSRNOG00000033256	LOC691141	chr8:22559098-22576154	+	protein_coding	1.76697	3.40338	0.0390506	0.0848897	4.43097	2.664	5.70519	7.07707	3.70077	36.0405	24.6733	9.55377
ENSRNOG00000033266	Prss30	chr10:13348307-13352371	-	protein_coding	3.25981	9.57857	0.00205733	0.0136932	3.53279	0.272976	0.285374	0.267083	0.083147	9.39655	19.8174	6.16321
ENSRNOG00000033433	Csrnp1	chr8:128659868-128672284	-	protein_coding	1.98094	3.94751	0.000170285	0.00440651	6.02875	4.0478	18.4148	14.5409	13.9942	71.4915	64.3662	57.73
ENSRNOG00000033434	Casp12	chr8:2659865-2686160	+	protein_coding	1.7739	3.41976	2.16063e-05	0.00255464	5.42172	3.64783	10.9892	11.238	12.422	38.4928	43.5076	43.8077
ENSRNOG00000033444	F10	chr16:81803110-81822716	-	protein_coding	1.12886	2.18685	0.00269534	0.0158981	1.31168	0.182821	0.133297	0.047767	0.231672	1.04902	1.98335	1.50214
ENSRNOG00000033527	Pappa	chr5:80920568-81150940	+	protein_coding	1.22528	2.33801	0.00770665	0.0290658	1.82551	0.600228	0.5191	0.603425	0.430293	3.56544	2.78157	1.57896
ENSRNOG00000033528	Tll1	chr16:27399467-27597240	+	protein_coding	1.15714	2.23015	0.00461906	0.0215017	2.46998	1.31284	0.969721	1.72903	1.85233	4.09876	5.46986	4.15531
ENSRNOG00000033570	Arhgap8	chr7:125731275-125795980	-	protein_coding	2.48536	5.59975	0.00174208	0.0125732	4.92928	2.44391	4.28145	5.51032	3.6851	45.0912	25.5089	22.1511
ENSRNOG00000033609	Irx1	chr1:33910912-33916741	+	protein_coding	1.13757	2.2001	0.00612562	0.0253082	6.37919	5.24162	31.9649	42.401	36.8533	105.98	70.7982	74.0877
ENSRNOG00000033697	Casp4	chr8:2635851-2651652	+	protein_coding	3.3762	10.3833	0.000288782	0.00542068	7.4267	4.05051	16.3218	15.2042	15.2089	225.426	190.07	116.723
ENSRNOG00000033747	Sp110	chr9:92593910-92616165	-	protein_coding	1.95105	3.86655	0.000201235	0.00471567	6.93861	4.98756	32.5582	34.91	25.4974	127.839	127.578	110.423
ENSRNOG00000033844	LOC100912195	chr1:116565790-116567189	-	protein_coding	1.22014	2.32969	0.0167788	0.0470435	5.20039	3.98025	16.6722	18.0649	10.6682	26.7914	37.5225	45.4298
ENSRNOG00000033891	LOC100361475	chr20:33174892-33182294	+	protein_coding	1.13108	2.19023	0.00066041	0.00781701	4.07878	2.94769	6.54069	6.98107	6.63062	17.8467	16.7021	13.4624
ENSRNOG00000033933	Stfa3	chr11:67308943-67314172	+	protein_coding	0.610788	1.52709	0.0400185	0.0864769	0.610788	0	0	0	0	1.00612	0.250763	0.419267
ENSRNOG00000034038	AABR07005844.1	chr1:203160323-203228318	+	protein_coding	1.12407	2.17961	0.048491	0.0992965	2.30385	1.17978	0.68819	1.91983	1.35867	6.31155	3.94866	2.32726
ENSRNOG00000034084	Ggct	chr4:85186644-85192834	-	protein_coding	2.88153	7.3693	0.00265137	0.0157893	5.65886	2.77733	6.31995	6.11055	5.19108	90.2018	37.6546	35.5806
ENSRNOG00000034116	Gk	chrX:54227397-54303864	-	protein_coding	2.76055	6.77657	0.00190225	0.01315	5.67385	2.9133	5.25973	6.08924	8.63422	70.632	55.4199	31.9202
ENSRNOG00000034241	Set	chr19:58419961-58421504	+	protein_coding	0.76115	1.69484	6.36033e-05	0.00337585	3.69736	2.93621	6.90775	6.23439	6.83806	12.1803	11.7102	12.0308
ENSRNOG00000036603	Ifit1bl	chr1:252914684-252922486	-	protein_coding	4.86285	29.098	0.00134773	0.0111062	6.70674	1.84389	5.28289	0.653298	3.4534	83.2332	134.105	99.1464
ENSRNOG00000036604	Ifit2	chr1:252894663-252900726	+	protein_coding	3.04813	8.27137	0.0053865	0.0235243	3.5064	0.458277	1.5351	0.02299	0	11.3734	15.2141	6.315
ENSRNOG00000036663	Foxk2	chr10:110469290-110518848	+	protein_coding	1.43696	2.7075	0.00187568	0.0130727	4.05312	2.61616	5.0755	6.35422	4.15832	13.5917	14.8743	18.7483
ENSRNOG00000036672	Sectm1a	chr10:110263783-110274768	-	protein_coding	1.00822	2.01143	0.00519153	0.0229554	1.3316	0.323375	0.049912	0.575195	0.18454	1.62407	1.60465	1.33255
ENSRNOG00000036673	Sectm1b	chr10:110251363-110259985	-	protein_coding	2.09968	4.28614	0.000126091	0.00396913	2.37201	0.272337	0.21501	0.397651	0.037448	4.00376	3.85793	4.70683
ENSRNOG00000036676	Csnk1d	chr10:110148600-110182408	-	protein_coding	0.88427	1.84583	0.0320901	0.0734015	5.32198	4.43771	22.1325	19.4532	20.5114	46.9907	47.423	26.5434
ENSRNOG00000036677	Slc16a3	chr10:110138586-110148358	+	protein_coding	2.05861	4.16583	0.013955	0.0416133	4.03538	1.97677	2.31468	4.59443	2.28856	9.20225	14.4371	26.9928
ENSRNOG00000036687	Alyref	chr10:109770876-109774639	-	protein_coding	0.76565	1.70014	0.0049271	0.0222946	4.74869	3.98304	16.8882	14.1045	13.6342	22.5912	29.1061	26.3581
ENSRNOG00000036692	Gcgr	chr10:109707962-109716128	+	protein_coding	0.658886	1.57886	0.0201055	0.053269	0.760057	0.101171	0.0233756	0	0.205956	0.947661	0.372761	0.816735
ENSRNOG00000036693	Slc25a10	chr10:109665682-109673143	+	protein_coding	1.06297	2.08923	0.0152969	0.044154	3.69927	2.63631	5.36945	6.15597	4.27291	16.7196	10.695	9.57605
ENSRNOG00000036695	Mrpl12	chr10:109658032-109662535	+	protein_coding	0.618497	1.53528	0.0387105	0.0843774	4.70082	4.08232	17.5895	15.4301	14.9146	19.4016	31.2945	25.6975
ENSRNOG00000036697	Mafg	chr10:109806159-109811323	-	protein_coding	1.38318	2.60842	0.00897133	0.0318134	3.28817	1.905	2.39482	2.1435	3.92213	12.0705	7.16494	7.73515
ENSRNOG00000036698	Nploc4	chr10:109552649-109610030	-	protein_coding	0.605342	1.52134	0.00154435	0.0118974	4.67481	4.06947	16.4743	15.2173	15.7001	26.9991	24.2591	22.5619
ENSRNOG00000036760	Tmc5	chr1:188278469-188337308	+	protein_coding	1.82795	3.55033	0.00862219	0.0310608	2.60326	0.775305	0.699136	0.658009	0.779734	2.95303	8.79226	4.79648
ENSRNOG00000036826	Glycam1	chr7:145172493-145174771	-	protein_coding	0.800373	1.74155	0.0150344	0.0436506	0.800373	0	0	0	0	0.329474	1.04492	0.94291
ENSRNOG00000036880	Arl5c	chr10:85941176-85948080	-	protein_coding	2.8773	7.34772	0.000427191	0.00646477	4.57527	1.69797	3.33634	1.38229	2.30601	22.5657	20.3435	25.936
ENSRNOG00000036885	Gbp3	chr2:248451547-248484100	-	protein_coding	1.73035	3.31809	0.00414102	0.0201414	2.18995	0.459598	0.472735	0.308335	0.349631	2.14131	3.84811	5.23794
ENSRNOG00000036942	Tnfrsf9	chr5:168009393-168035810	+	protein_coding	4.83595	28.5606	0.000388273	0.00620105	5.52013	0.684178	0.596957	0.7039	0.524533	69.8127	52.3007	24.6054
ENSRNOG00000037097	Wfdc18	chr10:71008709-71010863	+	protein_coding	1.1486	2.21698	0.0186053	0.0505091	1.21954	0.0709436	0	0.15896	0	2.0906	0.57511	1.59418
ENSRNOG00000037100	Heatr9	chr10:70726071-70735742	-	protein_coding	1.73211	3.32213	0.000962227	0.00934157	1.80413	0.0720172	0.088901	0.066718	0	3.5092	1.84058	2.32491
ENSRNOG00000037113	Slfn2	chr10:70370300-70376331	+	protein_coding	1.54728	2.92265	8.5721e-05	0.00363468	8.01271	6.46543	94.3873	90.8541	77.7546	256.477	271.971	244.099
ENSRNOG00000037167	Rtp3	chr8:119260618-119265157	-	protein_coding	3.71335	13.1168	6.49274e-05	0.00339194	4.59417	0.880826	0.96844	0.778028	0.78404	26.1782	27.6226	17.1143
ENSRNOG00000037198	Usp18	chr4:153805993-153834430	+	protein_coding	3.02477	8.13852	0.000503408	0.00686779	7.61396	4.58919	26.0374	24.5128	19.2175	229.927	238.676	134.828
ENSRNOG00000037289	Iqcf1	chr8:115193146-115195668	+	protein_coding	0.603441	1.51934	0.0168503	0.0471684	0.705371	0.10193	0	0.121445	0.102235	0.987756	0.507861	0.446402
ENSRNOG00000037371	XAF1	chr10:58860940-58873674	+	protein_coding	2.16301	4.47847	0.00054795	0.00717267	6.61807	4.45507	26.1069	18.8376	18.6227	79.3232	113.221	102.307
ENSRNOG00000037375	RGD1565410	chr7:116373324-116504853	-	protein_coding	2.42301	5.36289	0.000148741	0.00421193	2.64696	0.223945	0.440344	0.001788	0.104079	4.7914	5.17171	5.87464
ENSRNOG00000037409	Scimp	chr10:57415832-57436368	-	protein_coding	1.98176	3.94976	0.00993183	0.0337868	4.76491	2.78314	7.4207	8.53108	3.06386	25.2044	33.8516	21.0061
ENSRNOG00000037426	LOC100912590	chr12:52670898-52674737	+	protein_coding	0.654844	1.57445	0.017636	0.0486479	2.66257	2.00772	3.22401	3.11019	2.74601	6.80355	5.07741	4.35215
ENSRNOG00000037478	Noc4l	chr12:52072188-52076739	+	protein_coding	1.19674	2.2922	0.00512973	0.0227861	3.49685	2.30012	4.43508	4.11351	3.29822	12.9349	10.6518	7.86089
ENSRNOG00000037500	Pus1	chr12:51937175-51945928	+	protein_coding	1.20646	2.30771	0.00109268	0.0100575	3.96991	2.76345	6.70669	5.86534	4.91718	15.8662	15.5202	12.8088
ENSRNOG00000037604	Ascc3	chr20:55253686-55556473	+	protein_coding	0.922551	1.89546	0.0179805	0.0492636	4.00083	3.07828	6.36542	8.03285	8.05602	11.155	15.5496	19.3969
ENSRNOG00000037607	Rplp2	chr1:214428526-214430515	+	protein_coding	0.589409	1.50463	0.027901	0.0664099	7.65599	7.06658	142.556	135.411	121.994	251.206	182.355	176.417
ENSRNOG00000037620	Mob3c	chr5:134679713-134688963	+	protein_coding	1.00482	2.0067	0.01954	0.0522373	3.5479	2.54307	5.45622	4.12323	4.98552	7.58326	14.523	11.0072
ENSRNOG00000037744	Oas1g	chr12:42343123-42355131	+	protein_coding	1.49394	2.81657	0.000317454	0.00563089	3.2148	1.72086	2.266	2.60738	2.04009	9.7139	7.94943	7.34668
ENSRNOG00000037814	Cxcl17	chr1:82267381-82279145	-	protein_coding	1.34147	2.53409	0.00990118	0.0337655	7.00039	5.65892	50.8018	57.7998	41.3445	173.933	125.702	93.6955
ENSRNOG00000037853	Rarres1	chr2:164650722-164684985	-	protein_coding	1.51215	2.85236	0.0462271	0.09615	3.18601	1.67386	2.68363	2.03282	1.9075	4.65517	17.4354	6.23028
ENSRNOG00000037931	Plaur	chr1:81328183-81344708	+	protein_coding	1.77432	3.42076	0.00266011	0.0157938	4.85484	3.08052	7.41737	8.82485	6.31954	35.5082	30.5067	20.065
ENSRNOG00000037967	Thap7	chr11:87399483-87403367	-	protein_coding	0.716489	1.64318	0.0141432	0.0420106	3.0051	2.28861	4.28637	3.85995	3.53973	6.63821	5.82503	8.92605
ENSRNOG00000038025	Rpp38	chr17:78915604-78919143	+	protein_coding	0.797637	1.73825	0.00024962	0.00510467	2.29554	1.49791	2.02643	1.64256	1.81701	3.84379	4.12429	3.76719
ENSRNOG00000038085	Rpe	chr9:73687743-73711571	+	protein_coding	0.620488	1.5374	0.0158251	0.0452061	2.92275	2.30226	4.33308	3.54945	3.94549	6.88932	7.75623	5.3117
ENSRNOG00000038129	Defb52	chr16:75572070-75574546	+	protein_coding	3.99882	15.9869	0.001036	0.00975817	4.18879	0.189969	0.218943	0	0.217798	8.71427	26.0252	22.1031
ENSRNOG00000038881	Hcls1	chr11:66736966-66759402	-	protein_coding	1.09928	2.14248	0.0344959	0.07724	5.99273	4.89345	22.3149	35.1445	30.1567	94.6607	53.0341	48.9547
ENSRNOG00000038999	RT1-A1	chr20:5351605-5421098	+	protein_coding	1.22323	2.33469	0.00442722	0.020945	5.24505	4.02183	14.7481	17.4651	13.7398	35.5471	29.8964	47.3053
ENSRNOG00000039048	Cd200r1	chr11:60848131-60882379	-	protein_coding	0.761973	1.69581	0.0134846	0.0407978	2.58745	1.82548	2.25135	3.14146	2.30639	4.05073	6.08707	5.06569
ENSRNOG00000039204	Pram1	chr7:18510354-18515503	+	protein_coding	2.27776	4.84923	0.000123636	0.00395851	3.71018	1.43242	1.52007	2.27248	1.38404	11.0963	13.0934	12.1509
ENSRNOG00000039379	RGD1562963	chr17:21600432-21613930	+	protein_coding	1.26019	2.39527	0.0189022	0.0511528	2.10655	0.846357	0.760378	0.76971	0.865644	3.61926	5.14704	1.81295
ENSRNOG00000039593	Ecscr	chr18:28506934-28516209	-	protein_coding	1.56453	2.95782	0.00445005	0.021012	6.07704	4.5125	26.6371	20.3567	19.1451	48.2367	82.1639	74.1426
ENSRNOG00000039698	Prss22	chr10:13370098-13374808	-	protein_coding	3.2851	9.74797	0.0268396	0.0647096	3.45435	0.169243	0.108358	0.133771	0.131452	17.2102	23.7173	1.92596
ENSRNOG00000039744	RT1-CE4	chr20:4673658-4935887	-	protein_coding	2.50074	5.65976	8.2969e-05	0.00362032	6.04142	3.54068	10.7076	12.4663	8.99627	72.9996	63.6264	58.7461
ENSRNOG00000039858	Mfsd12	chr7:11216975-11223649	-	protein_coding	0.637731	1.55588	0.00198506	0.0134398	3.71633	3.0786	7.66435	8.23348	6.53611	12.0852	12.4822	11.8717
ENSRNOG00000039860	AC126960.1	chr4:26253329-26255639	-	protein_coding	1.11397	2.16441	0.00556092	0.0239764	1.15406	0.0400877	0.086933	0	0	0.851895	1.03474	1.92479
ENSRNOG00000039865	Vnn3	chr1:22649081-22661377	-	protein_coding	1.9075	3.75157	0.0004758	0.00674421	3.62857	1.72107	2.35938	2.70922	1.87567	9.27136	11.5783	13.6444
ENSRNOG00000039980	Slc25a5	chrX:123404518-123407645	+	protein_coding	1.28716	2.44047	0.00350796	0.0183116	7.29382	6.00667	64.3029	63.7351	61.8764	189.033	117.298	170.86
ENSRNOG00000040109	Treml1	chr9:14597172-14599594	-	protein_coding	2.39169	5.24773	0.00314265	0.0173448	3.86647	1.47478	1.94629	0.947619	2.74176	13.4363	18.9521	9.77271
ENSRNOG00000042029	Efs	chr15:33578381-33589522	-	protein_coding	1.11816	2.1707	0.00117275	0.0104438	2.88571	1.76755	2.52971	2.68874	2.03137	6.86015	7.03112	5.39512
ENSRNOG00000042078	Icam4	chr8:22047697-22048793	+	protein_coding	1.62982	3.09474	0.00645876	0.026157	2.35478	0.724964	0.658092	0.42005	0.917764	6.39237	3.84041	2.74038
ENSRNOG00000042137	Tmem173	chr18:28529576-28535828	-	protein_coding	2.06127	4.17353	0.0335249	0.0757421	5.01559	2.95432	7.98329	7.78239	4.90158	47.889	49.3711	12.7446
ENSRNOG00000042224	Cyp2j10	chr5:115021723-115222084	-	protein_coding	0.600949	1.51671	0.0260597	0.0634512	2.05877	1.45782	1.87783	2.21934	1.23721	3.64808	2.96134	2.92767
ENSRNOG00000042230	RGD1307182	chr9:14646151-14654305	-	protein_coding	1.8462	3.59551	0.00320619	0.0175199	2.39437	0.548175	0.455635	0.688272	0.272203	2.70154	4.65264	5.94543
ENSRNOG00000042258	RGD1561157	chr10:13084304-13085228	+	protein_coding	3.09276	8.53127	0.0349386	0.0779792	4.35449	1.26173	0.2117	0.257472	8.04812	26.2439	14.6118	19.1267
ENSRNOG00000042320	Slc41a1	chr13:48607308-48627999	+	protein_coding	0.914582	1.88502	0.0023663	0.0148013	3.99367	3.07909	7.21909	7.96957	7.18648	16.4809	16.2907	12.3742
ENSRNOG00000042326	Smpdl3b	chr5:150925370-150949931	-	protein_coding	1.35479	2.5576	0.000104094	0.0038093	2.91803	1.56324	1.98073	2.25256	1.66195	6.27681	6.70957	6.69621
ENSRNOG00000042353	Mlkl	chr19:43506976-43528851	-	protein_coding	1.96349	3.90006	2.15146e-05	0.00255464	4.89715	2.93366	6.71985	6.86409	6.34685	29.2711	31.535	25.8653
ENSRNOG00000042465	Zbtb32	chr1:89043086-89045586	-	protein_coding	1.16919	2.24886	0.00793409	0.0295747	1.6345	0.465309	0.583809	0.086855	0.528769	2.39418	2.55347	1.48151
ENSRNOG00000042603	Ttc39b	chr5:101304982-101405656	-	protein_coding	1.4982	2.8249	0.000130484	0.00400345	3.57869	2.08049	2.72127	3.69005	3.33509	11.3364	11.0776	10.4475
ENSRNOG00000042741	Adgb	chr1:4445027-4560789	-	protein_coding	0.594549	1.51	0.0325726	0.0742493	2.15991	1.56536	2.14417	1.82896	1.91424	2.50705	3.80297	4.29833
ENSRNOG00000042787	Fam229a	chr5:147692391-147693380	+	protein_coding	0.708643	1.63427	0.00191525	0.0131882	1.26996	0.56132	0.4086	0.619894	0.408149	1.31078	1.65947	1.28212
ENSRNOG00000042878	Wdr74	chr1:224933529-224938662	+	protein_coding	0.693394	1.61708	0.0428178	0.090905	4.05962	3.36622	10.6128	8.77045	8.6639	17.4692	19.3355	11.3451
ENSRNOG00000042929	Nos1ap	chr13:88636875-88943592	-	protein_coding	0.927782	1.90235	0.00353374	0.0183959	2.43978	1.512	1.8811	1.88573	1.79033	5.60508	4.21082	3.64041
ENSRNOG00000042990	AABR07021804.1	chr13:91980114-91981432	-	protein_coding	2.07922	4.22578	0.0176955	0.0487489	3.32748	1.24826	1.82987	1.42861	0.950596	4.84965	18.5724	7.83567
ENSRNOG00000043053	Zfp639	chr2:118910587-118916563	+	protein_coding	0.772673	1.70843	0.0117962	0.0377288	2.24648	1.47381	2.4098	1.25788	1.78326	3.53274	3.9777	3.73573
ENSRNOG00000043098	Mt2A	chr19:11307967-11308740	-	protein_coding	7.68741	206.13	8.31066e-06	0.00245108	10.42	2.73257	6.68391	7.00823	3.77134	1539.18	1408.35	1183.65
ENSRNOG00000043416	Bcl3	chr1:80730499-80744831	-	protein_coding	4.16354	17.9205	0.000277912	0.00532447	6.2719	2.10836	3.14793	2.80489	4.07999	119.834	63.6753	58.042
ENSRNOG00000043426	Kyat3	chr2:248649441-248690089	+	protein_coding	1.21471	2.32095	0.0140017	0.0417163	3.20819	1.99347	2.39608	3.54423	3.09118	6.58826	6.80988	12.3197
ENSRNOG00000043439	Zfp707l1	chr7:116997020-117007662	+	protein_coding	1.54154	2.91106	0.00668842	0.0266273	3.70505	2.16351	2.88338	3.96104	3.66726	16.0299	13.5474	7.95366
ENSRNOG00000043503	Ehd1	chr1:221644867-221667239	+	protein_coding	0.93837	1.91636	0.00238179	0.0148471	5.30828	4.36991	17.8471	19.4397	21.9455	36.571	45.0257	34.9747
ENSRNOG00000045641	LOC691695	chr15:36448971-36451720	-	protein_coding	1.1245	2.18025	0.0168695	0.0471966	1.22235	0.0978521	0.041989	0.085439	0.083679	1.57065	2.09459	0.596771
ENSRNOG00000045649	Arrdc3	chr2:8732932-8743069	+	protein_coding	0.681448	1.60375	0.0295986	0.0692379	6.46913	5.78768	61.591	45.4987	56.9226	71.803	88.1959	106.082
ENSRNOG00000045668	Ifnar2	chr11:31539016-31558851	+	protein_coding	1.37303	2.59013	0.000265177	0.00523267	5.47664	4.10361	16.4598	15.7272	16.3968	47.7246	37.1813	46.4569
ENSRNOG00000045760	Ebna1bp2	chr5:137670123-137674802	+	protein_coding	1.15743	2.2306	0.000750529	0.00828774	4.9394	3.78197	13.6346	11.4483	13.2878	29.4359	33.7874	26.2843
ENSRNOG00000045829	Thbs1	chr3:109862117-109873466	+	protein_coding	2.91238	7.52861	1.90199e-05	0.00253197	7.11406	4.20168	19.4792	18.162	14.876	128.56	147.07	137.58
ENSRNOG00000045860	U2af1	chr20:10396621-10407554	-	protein_coding	0.808392	1.75126	0.00436899	0.0207763	6.61934	5.81095	53.4849	55.5422	56.4329	114.32	98.321	81.9689
ENSRNOG00000045941	Susd6	chr6:104437159-104530403	+	protein_coding	1.12419	2.1798	0.00183135	0.012964	5.42538	4.30119	19.8618	18.1674	18.1622	51.1005	40.4303	35.766
ENSRNOG00000045973	LOC102553861	chr15:36327721-36472346	-	protein_coding	2.97788	7.87828	0.000564559	0.00727125	4.69354	1.71565	2.54927	1.73886	2.64487	33.2454	26.7611	17.2241
ENSRNOG00000045998	Sema6b	chr9:10941613-10951252	+	protein_coding	1.92816	3.80568	3.2052e-05	0.00279121	3.76664	1.83849	2.74609	2.83694	2.1824	12.3346	13.3479	12.178
ENSRNOG00000046031	LOC103689996	chr20:5198258-5212624	-	protein_coding	2.57905	5.97546	0.000109205	0.00384226	6.10936	3.53031	12.1326	9.10133	10.6268	56.9446	77.0431	71.7704
ENSRNOG00000046120	Uchl3	chr3:171092946-171134655	-	protein_coding	1.7473	3.3573	0.000677247	0.00790797	4.55721	2.80991	5.84901	6.54494	5.6729	27.3387	23.5839	17.7299
ENSRNOG00000046151	Tubb1	chr3:172550258-172558114	+	protein_coding	2.12367	4.358	0.000960101	0.00933339	3.32305	1.19939	1.4425	0.773224	1.79612	7.91617	11.2614	8.16848
ENSRNOG00000046191	Mb21d1	chr8:85789763-85803433	-	protein_coding	1.55884	2.94618	0.0134852	0.0407978	2.2283	0.669459	0.363302	0.94675	0.515931	5.22017	4.60703	1.95001
ENSRNOG00000046202	Metrnl	chr10:110893232-110907243	+	protein_coding	1.66617	3.1737	0.0170938	0.047651	4.87734	3.21118	6.44538	11.1042	7.8137	23.164	47.9185	20.4802
ENSRNOG00000046214	Cyp27b1	chr7:70335061-70340005	+	protein_coding	1.88426	3.69163	0.000429645	0.00648934	1.98837	0.104118	0.241731	0	0	3.22871	3.51463	2.27229
ENSRNOG00000046222	LOC103689942	chr1:83003841-83010171	+	protein_coding	1.70773	3.26646	0.00330576	0.0178229	3.19123	1.4835	1.45527	2.44154	1.58753	5.74192	8.91892	10.3952
ENSRNOG00000046272	LOC103689931	chr10:37049677-37055282	-	protein_coding	0.70767	1.63316	0.00719353	0.0277642	6.45548	5.74781	50.6795	51.7268	55.943	95.5582	94.9442	71.9579
ENSRNOG00000046301	Gzmbl3	chr15:36111986-36114752	-	protein_coding	2.15626	4.45757	0.0337538	0.0761057	3.01577	0.859518	0.808512	0.491418	1.21463	10.8533	12.7111	2.2554
ENSRNOG00000046313	Basp1	chr2:77586424-77632628	-	protein_coding	1.16201	2.23769	0.0208199	0.054536	4.7532	3.59119	10.1382	12.8114	10.3792	25.2114	18.1424	38.0914
ENSRNOG00000046379	LOC100912604	chr3:14588870-14591974	+	protein_coding	1.46299	2.7568	0.0335029	0.0757044	4.36643	2.90343	7.73577	8.48653	4.05422	32.9674	15.6271	14.5381
ENSRNOG00000046391	Fam177a1	chr6:76041669-76053759	+	protein_coding	1.47465	2.77917	0.00100829	0.00961042	5.36418	3.88953	11.9986	14.3243	15.3425	38.3615	48.6554	34.7523
ENSRNOG00000046414	Vwa5a	chr3:158997834-159021582	+	protein_coding	1.44323	2.71929	0.00260286	0.015629	5.2973	3.85407	10.3637	16.9582	13.8181	33.8607	38.3698	43.3038
ENSRNOG00000046439	LOC100910929	chr1:226742343-226767868	+	protein_coding	1.55179	2.93181	0.00189204	0.0131125	3.03354	1.48175	1.80519	1.84758	1.72719	9.14728	5.17672	7.75895
ENSRNOG00000046452	Fcgr2b	chr13:89327794-89433815	-	protein_coding	1.23399	2.35217	0.000755872	0.00832146	4.0438	2.80981	6.35051	6.37582	5.35892	13.1285	17.2054	16.443
ENSRNOG00000046663	Fcgr2a	chr13:91146876-91229066	-	protein_coding	1.31121	2.48149	0.0280473	0.0666809	5.82906	4.51785	17.3075	34.0992	17.7113	53.7536	75.9336	42.6152
ENSRNOG00000046699	Slpi	chr3:160799981-160802433	-	protein_coding	5.20588	36.9084	0.00277399	0.0161202	8.46018	3.2543	6.498	9.09022	10.4837	123.219	727.097	481.978
ENSRNOG00000046761	AABR07035375.1	chr12:11806834-11808977	-	protein_coding	0.869912	1.82755	0.0341084	0.0766792	2.77975	1.90984	3.58435	2.55279	2.2577	6.29495	4.06867	7.75891
ENSRNOG00000046779	LOC100911562	chr7:118692851-118719156	+	protein_coding	1.42032	2.67644	0.00414724	0.0201617	2.26666	0.846343	1.12741	0.896297	0.440673	5.11137	3.15314	3.39017
ENSRNOG00000046797	Rpusd2	chr3:110835683-110840068	+	protein_coding	0.695444	1.61938	0.0168002	0.0470881	0.988362	0.292918	0.242208	0.295913	0.14225	0.58424	1.11053	1.33543
ENSRNOG00000046803	Arhgef16	chr5:171624796-171648563	-	protein_coding	0.970342	1.95931	0.00163864	0.0121814	2.90201	1.93167	2.77962	2.47856	3.22303	5.80835	6.17301	7.55135
ENSRNOG00000046834	C3	chr9:9721105-9747167	+	protein_coding	2.73351	6.6507	0.00141593	0.0113466	8.39845	5.66494	32.7119	72.6178	51.6247	285.262	374.03	356.872
ENSRNOG00000046839	LOC103694226	chr18:55466373-55467629	+	protein_coding	2.52446	5.75359	0.00037462	0.00611281	4.03033	1.50586	2.167	1.76179	1.61872	13.8849	20.7998	12.4446
ENSRNOG00000047076	Oas1i	chr12:41155497-41167505	+	protein_coding	1.19389	2.28769	0.0149817	0.0435322	3.26719	2.0733	3.63864	4.20964	2.08447	10.9636	8.62248	6.75214
ENSRNOG00000047175	Cryaa	chr20:10438444-10442187	+	protein_coding	0.645275	1.56404	0.0127621	0.0394981	0.645275	0	0	0	0	0.891936	0.320728	0.531162
ENSRNOG00000047204	Gp6	chr1:73040901-73064641	+	protein_coding	1.50206	2.83246	0.00466703	0.0215742	2.2544	0.752346	0.40773	0.489882	1.27911	3.32618	4.83873	3.30036
ENSRNOG00000047276	LOC100362738	chr20:18058245-18060661	-	protein_coding	0.936376	1.91372	0.00646886	0.0261895	5.22165	4.28527	16.2247	20.6066	18.9181	44.3879	35.2039	30.617
ENSRNOG00000047321	Hba-a2	chr10:15589364-15590220	-	protein_coding	0.803599	1.74545	0.0258869	0.0631772	11.518	10.7144	1748.01	1281.66	2113.2	2921.59	2606.34	3308.84
ENSRNOG00000047368	Acer1	chr9:10061978-10093588	+	protein_coding	0.593441	1.50884	0.00501098	0.0225618	0.609854	0.016413	0	0.034719	0	0.625252	0.656407	0.320279
ENSRNOG00000047513	Mdn1	chr5:47894530-48036287	+	protein_coding	0.908398	1.87696	0.000156586	0.00424064	2.7015	1.7931	2.50445	2.399	2.49429	6.02996	5.49346	5.02929
ENSRNOG00000047594	Heatr1	chr17:66446162-66619250	+	protein_coding	1.02584	2.03615	0.00055343	0.00718619	2.69185	1.66601	2.08892	2.23617	2.19683	6.20258	5.59644	4.67788
ENSRNOG00000047605	Ptprk	chr1:17446417-18058055	-	protein_coding	0.876797	1.83629	0.00377035	0.0190205	5.37546	4.49867	19.7835	21.5387	23.6634	33.8507	44.1301	44.4829
ENSRNOG00000047611	Top1	chr3:156642464-156717686	+	protein_coding	0.920096	1.89224	0.00061822	0.007568	6.51884	5.59875	46.1381	45.2998	51.1459	92.8542	98.2891	81.7458
ENSRNOG00000047647	Il2ra	chr17:70499083-70548071	-	protein_coding	2.98995	7.94446	0.000412186	0.00637842	4.19436	1.20441	1.1448	1.68582	1.12435	18.4642	22.9428	12.1665
ENSRNOG00000047663	Gata1	chrX:15273933-15281759	+	protein_coding	0.86556	1.82205	0.00152917	0.0118712	1.2428	0.377241	0.365874	0.329968	0.206231	1.65459	1.09708	1.38095
ENSRNOG00000047697	Ggt1	chr20:14019861-14025068	-	protein_coding	2.03438	4.09647	0.000761962	0.00835473	3.42253	1.38815	1.81673	1.5637	1.48321	8.0946	13.4008	8.41207
ENSRNOG00000047741	E2f2	chr5:154522119-154540265	+	protein_coding	0.968447	1.95673	0.00433299	0.0206949	3.43516	2.46671	5.42789	4.11469	4.1378	11.0571	10.5299	8.1032
ENSRNOG00000047780	AABR07046635.1	chr5:230896-231742	+	protein_coding	2.36704	5.15882	0.00327471	0.0177305	3.3579	0.99086	0.886594	0.840794	1.26023	13.6907	10.6548	5.29416
ENSRNOG00000047782	RGD1309808	chr7:118895405-118970135	+	protein_coding	1.3292	2.51263	0.00369991	0.0188008	2.37677	1.04758	1.28247	0.773315	1.18205	5.71266	3.74381	3.39966
ENSRNOG00000047895	Mettl1	chr7:70328391-70333166	+	protein_coding	1.92755	3.80409	0.000744481	0.00824483	3.30937	1.38182	2.02182	1.59167	1.25977	10.9975	9.12181	7.02261
ENSRNOG00000047941	Krtcap3	chr6:26485126-26486695	-	protein_coding	0.711155	1.63711	0.00349094	0.0182787	4.59091	3.87976	14.2713	14.2323	12.7129	26.6295	22.3402	20.7036
ENSRNOG00000047943	Alkbh6	chr1:90957133-90962466	-	protein_coding	0.586579	1.50168	0.0256017	0.0627128	2.24231	1.65573	2.54956	2.22358	1.73374	3.63742	3.10054	4.5704
ENSRNOG00000047988	RGD1565363	chr1:198120099-198121158	+	protein_coding	0.785429	1.72361	0.00609668	0.0252245	6.46021	5.67478	58.0763	47.508	45.5173	100.532	79.944	82.0554
ENSRNOG00000048168	Gtpbp6	chr12:52637000-52640839	+	protein_coding	0.663128	1.58351	0.0228735	0.0580336	2.73489	2.07177	3.39505	3.56539	2.70296	7.1716	5.45373	4.59419
ENSRNOG00000048169	Tuba8	chr4:153774486-153791328	+	protein_coding	2.72953	6.63241	0.0168047	0.0470889	3.31209	0.582556	0.542497	0.81465	0.19973	14.9576	14.6191	2.93089
ENSRNOG00000048222	Nlrc5	chr19:10905542-10976396	-	protein_coding	2.62247	6.15805	1.72826e-05	0.00253197	4.54425	1.92178	3.27175	2.4707	2.66873	20.4415	23.3779	23.3007
ENSRNOG00000048270	Knop1	chr1:188368581-188373571	-	protein_coding	0.61962	1.53647	0.0274246	0.0656196	2.76879	2.14917	3.97477	3.40225	2.98514	5.97333	7.13031	4.58364
ENSRNOG00000048273	Apod	chr11:72705129-72726301	+	protein_coding	1.89755	3.72581	0.00199096	0.013473	1.97393	0.0763726	0	0	0.172118	4.30711	1.89154	2.95044
ENSRNOG00000048277	AABR07035787.1	chr12:22466601-22470972	+	protein_coding	0.875053	1.83408	0.00566439	0.0241576	5.45654	4.58149	26.6699	19.5329	23.1568	49.3818	38.5603	41.4832
ENSRNOG00000048302	LOC100910979	chr18:55463308-55464632	+	protein_coding	3.77152	13.6566	0.0428538	0.0909415	6.34267	2.57115	14.2022	12.8061	0	73.934	85.3596	81.6059
ENSRNOG00000048315	Eif2ak2	chr6:1428834-1466201	-	protein_coding	2.00881	4.02451	0.000523212	0.00700651	6.62871	4.6199	24.856	23.9375	22.0552	113.669	110.228	74.9731
ENSRNOG00000048470	LOC100911238	chr12:8746855-8759599	-	protein_coding	0.965421	1.95263	0.0248856	0.0614764	6.60293	5.63751	45.5782	44.2252	57.5616	113.566	115.513	67.8033
ENSRNOG00000048495	Rrp12	chr1:261106760-261140389	-	protein_coding	1.72909	3.31518	0.00344339	0.0182364	3.64764	1.91856	2.81704	2.90393	2.62577	14.2972	14.0764	7.53575
ENSRNOG00000048712	Ccdc137	chr10:109630099-109636480	+	protein_coding	0.824091	1.77042	0.00230662	0.0145652	3.57432	2.75023	6.47045	5.7973	4.9982	12.1736	10.6524	10.0107
ENSRNOG00000048719	Dtnbp1	chr17:20090246-20182206	+	protein_coding	0.756868	1.68982	0.000128191	0.00399381	4.09845	3.34158	9.82261	8.73893	8.88343	15.6957	16.1649	16.5399
ENSRNOG00000048783	LOC100909700	chr1:81609433-81627710	-	protein_coding	3.19075	9.13086	0.00758141	0.02875	4.02337	0.832619	0.351549	1.89717	0.442525	7.32716	28.9592	16.236
ENSRNOG00000048990	LOC685025	chrX:19384166-19386541	-	protein_coding	1.62584	3.08622	0.0242612	0.0605094	2.27995	0.65411	0.846918	0	1.10995	3.36017	2.53201	6.43834
ENSRNOG00000049007	LOC100911313	chr3:112605768-112614503	-	protein_coding	1.51472	2.85744	0.000222945	0.00485379	3.86771	2.35299	4.46387	4.05335	3.82929	14.9816	14.4596	11.5914
ENSRNOG00000049075	Fabp5	chr2:93981656-93985378	-	protein_coding	2.15148	4.44282	0.0168908	0.0472328	8.52124	6.36976	85.3488	105.496	60.5009	433.849	599.189	189.029
ENSRNOG00000049116	Polr2h	chr11:83878006-83882117	-	protein_coding	0.754335	1.68685	0.010284	0.0345962	2.98351	2.22917	3.63796	4.16398	3.30362	8.66753	6.34557	5.96686
ENSRNOG00000049121	Bysl	chr9:15393330-15403117	+	protein_coding	1.509	2.84612	0.0157214	0.0450159	3.54765	2.03865	3.83952	3.16698	2.43926	17.6945	7.47744	9.08949
ENSRNOG00000049229	Pomp	chr12:8976585-8989214	+	protein_coding	0.608907	1.5251	0.00246633	0.0151854	6.58051	5.9716	63.392	62.4607	59.4719	92.4491	106.096	86.5875
ENSRNOG00000049298	LOC100909595	chr4:155752447-155763500	-	protein_coding	0.894774	1.85932	0.00275285	0.0160784	1.8904	0.995624	0.96388	1.08095	0.939818	2.98452	2.09047	3.13808
ENSRNOG00000049370	LOC100360750	chr19:32770655-32785215	+	protein_coding	0.672336	1.59365	0.00717327	0.0277375	3.0703	2.39797	3.4729	5.0353	4.42364	7.0927	7.24947	7.87646
ENSRNOG00000049422	LOC103693683	chr13:91168973-91198036	-	protein_coding	1.54316	2.91432	0.0246809	0.061141	5.91211	4.36895	16.2793	34.1544	13.5228	70.6775	65.8209	44.5905
ENSRNOG00000049497	Eif6	chr3:151356868-151363115	-	protein_coding	1.27768	2.42448	0.000120492	0.00389714	5.9276	4.64992	25.0165	25.0374	22.3589	65.2247	59.6328	55.1602
ENSRNOG00000049517	Tnfaip3	chr1:14402913-14412807	-	protein_coding	3.78948	13.8276	2.44637e-05	0.00260395	6.61332	2.82384	6.3292	7.06401	5.0059	96.2731	111.921	84.4392
ENSRNOG00000049560	Glul	chr13:71331052-71340229	+	protein_coding	1.42261	2.6807	0.000797059	0.00851124	9.25397	7.83136	218.735	243.582	218.838	693.675	655.162	498.316
ENSRNOG00000049592	AABR07035791.1	chr12:22535672-22544479	+	protein_coding	0.930875	1.90643	0.0316924	0.0726975	1.20913	0.278253	0.140221	0.393475	0.122533	2.32581	0.791968	1.0736
ENSRNOG00000049598	LOC100912571	chr11:82886878-82893845	-	protein_coding	0.601496	1.51729	0.00051579	0.00695838	5.5724	4.9709	30.9999	29.1929	30.9241	49.3263	43.482	47.1281
ENSRNOG00000049622	LOC103690013	chr10:37069344-37072733	+	protein_coding	1.31779	2.49285	0.0104328	0.0348706	4.17242	2.85463	7.54228	6.06546	5.27004	13.2459	24.6497	15.0434
ENSRNOG00000049629	Reep2	chr18:27632786-27641591	+	protein_coding	1.57436	2.97803	0.00145443	0.0115206	2.08606	0.511703	0.585717	0.389649	0.315174	3.40354	4.1953	2.34572
ENSRNOG00000049714	Asap3	chr5:154552195-154594785	+	protein_coding	1.72407	3.30368	0.000205904	0.0047268	4.73584	3.01177	7.82143	6.6144	6.81125	30.0296	24.8259	22.6078
ENSRNOG00000049782	Csf2ra	chr14:1462358-1467264	+	protein_coding	0.815518	1.75993	0.023392	0.0589992	5.00917	4.19365	21.7581	18.9779	12.476	32.2461	30.9353	30.4572
ENSRNOG00000049828	Crlf2	chr14:1456844-1461543	-	protein_coding	0.909251	1.87807	0.0374879	0.0822427	4.34412	3.43487	13.6663	10.1854	6.7094	16.6358	22.7909	18.9674
ENSRNOG00000049873	Ap1s3	chr9:85387065-85445939	-	protein_coding	1.62689	3.08847	0.00524224	0.0231094	3.84961	2.22272	3.53694	4.19825	3.31214	16.8307	16.253	8.73891
ENSRNOG00000049918	Lrg1	chr9:10952374-10954681	+	protein_coding	1.67193	3.18641	0.00343178	0.0182069	5.86952	4.19759	20.7855	19.689	12.7055	45.4009	65.2225	64.0394
ENSRNOG00000049919	LOC691670	chr15:35163388-35166211	-	protein_coding	3.45912	10.9976	0.00160758	0.0120987	3.67906	0.219943	0.111521	0.147025	0.239189	17.2688	15.7895	5.85138
ENSRNOG00000049920	Psma2	chr17:53091933-53102342	-	protein_coding	0.755423	1.68813	0.0197855	0.0526156	7.16325	6.40783	105.252	72.5524	77.3269	149.413	158.865	121.468
ENSRNOG00000049944	LOC100911440	chr1:214410417-214414897	-	protein_coding	0.93845	1.91647	0.0138067	0.0413406	3.01288	2.07443	3.45496	2.22107	4.20663	7.62303	6.10204	7.58742
ENSRNOG00000049976	Gzmb	chr15:35413793-35417316	-	protein_coding	3.44264	10.8727	0.000559231	0.00723567	5.77368	2.33103	4.2887	2.86658	5.22954	71.2203	59.0478	36.7566
ENSRNOG00000049994	Ifi44l	chr2:256964860-256978668	+	protein_coding	2.36069	5.13616	0.000150114	0.00421193	6.01845	3.65776	14.343	10.6461	10.2513	59.3896	72.5242	60.3499
ENSRNOG00000050105	Ceacam4	chr1:81643816-81650094	+	protein_coding	2.24196	4.73038	0.000892947	0.0089994	3.28577	1.04382	0.752923	1.49026	1.00749	6.33851	10.1265	10.3601
ENSRNOG00000050110	Stfa2	chr11:67465236-67470941	+	protein_coding	2.32005	4.99348	0.00187917	0.0130885	4.83363	2.51359	4.39151	4.66574	5.09576	19.0548	41.4401	26.2403
ENSRNOG00000050198	Gzmbl1	chrX:123015480-123018444	-	protein_coding	2.57817	5.97184	0.0058244	0.0245284	2.62941	0.0512334	0.112419	0	0	6.92772	8.30538	2.21151
ENSRNOG00000050251	MGC105649	chr3:114772603-114776155	+	protein_coding	3.26963	9.64397	0.000312797	0.00561605	6.37827	3.10864	7.71404	9.50117	6.01332	96.8218	95.6694	59.8729
ENSRNOG00000050258	Ccnd3	chr9:15404822-15410943	-	protein_coding	0.950027	1.93191	0.000996901	0.00954439	4.72553	3.7755	13.2021	12.3783	12.5164	29.2201	25.2006	22.3868
ENSRNOG00000050287	LOC100912375	chr5:137458691-137463255	+	protein_coding	1.12496	2.18095	0.00113836	0.0102572	4.64818	3.52322	11.3063	9.67572	10.5681	27.2464	25.1893	20.3128
ENSRNOG00000050453	Fbxo27	chr1:86873253-86888958	+	protein_coding	2.26546	4.80809	0.000393758	0.00624824	2.96125	0.69579	0.664933	0.602961	0.592361	8.07311	7.88906	4.8569
ENSRNOG00000050500	Tob2	chr7:123079537-123088279	-	protein_coding	3.14463	8.84357	0.00345109	0.0182374	3.48569	0.341063	0.602021	0.268651	0	5.118	11.3668	17.5791
ENSRNOG00000050509	Ebi3	chr9:11110874-11114843	-	protein_coding	4.56978	23.7487	3.35931e-06	0.00222066	5.098	0.528224	0.463363	0.390426	0.474122	29.5049	39.4006	31.5984
ENSRNOG00000050586	Stfa2l2	chr11:67451549-67529051	+	protein_coding	2.74377	6.6982	0.0199543	0.052965	4.19509	1.45132	1.56706	2.35852	1.37186	6.64754	41.625	17.8521
ENSRNOG00000050675	Myl4	chr10:92628356-92638100	+	protein_coding	2.44466	5.44396	2.6749e-05	0.00268046	3.14475	0.700097	0.787836	0.617633	0.482664	8.44924	8.26123	6.90552
ENSRNOG00000050713	AABR07033279.1	chr11:15081774-15089850	+	protein_coding	0.808518	1.75141	0.000739801	0.00822103	4.84876	4.04024	14.3234	14.7726	17.4266	27.995	28.6468	26.8336
ENSRNOG00000050735	Cd99	chr20:56192390-56197025	-	protein_coding	0.685603	1.60837	0.00125696	0.0107783	7.27783	6.59223	101.446	95.4144	89.9357	151.37	168.757	143.48
ENSRNOG00000050790	Dcaf12	chr5:57667376-57683932	-	protein_coding	0.97219	1.96182	0.000377547	0.00611281	5.03944	4.06725	15.4493	16.2765	15.5764	35.2102	32.2381	28.5529
ENSRNOG00000050834	Fam102a	chr3:11554457-11586303	+	protein_coding	1.09792	2.14045	0.00539991	0.0235616	3.23404	2.13613	4.47074	3.48737	2.46001	8.86999	8.73453	7.66962
ENSRNOG00000050997	Ifrd1	chr6:60132024-60151420	-	protein_coding	1.28547	2.43762	0.000166079	0.00434469	6.17007	4.88459	25.6981	31.777	28.4562	74.8508	70.1571	68.1745
ENSRNOG00000051056	Fndc4	chr6:26387877-26389518	+	protein_coding	1.15616	2.22864	0.0414207	0.0887989	3.68233	2.52617	5.42638	5.65554	3.46898	16.9663	13.5517	7.0929
ENSRNOG00000051158	Cfb	chr20:4536203-4542947	-	protein_coding	2.44481	5.44453	0.000539903	0.0071186	9.90017	7.45536	149.297	212.152	167.741	778.564	912.196	1224.54
ENSRNOG00000051405	AABR07021465.1	chr13:73977578-74005486	-	protein_coding	2.46172	5.50875	0.0032152	0.0175431	2.47742	0.0156995	0	0.033185	0	4.66439	7.81177	2.46035
ENSRNOG00000051531	Ctu2	chr19:55300395-55305702	+	protein_coding	0.985781	1.98038	0.0341726	0.076788	3.2325	2.24672	4.16954	3.45198	3.64496	13.257	7.13653	6.15761
ENSRNOG00000051624	Hspe1	chr9:61692154-61694599	+	protein_coding	0.719038	1.64608	0.00182214	0.0129231	6.45417	5.73513	55.0394	45.9461	56.4441	82.8017	87.6534	89.729
ENSRNOG00000051915	Spred3	chr1:88103719-88112683	-	protein_coding	2.10399	4.29898	0.000127903	0.00399381	2.66221	0.558213	0.546743	0.499692	0.376247	4.76353	4.76579	6.63245
ENSRNOG00000051922	Samd9l	chr4:31229913-31299132	+	protein_coding	2.40984	5.31416	0.000206064	0.0047268	6.4265	4.01665	16.0029	15.1984	14.3958	88.3176	103.721	67.0351
ENSRNOG00000051952	Tes	chr4:44321883-44360405	+	protein_coding	0.60724	1.52334	0.00469555	0.0216417	5.282	4.67475	26.767	26.0063	21.2193	39.2707	38.3009	36.2156
ENSRNOG00000052004	Txnl4a	chr18:76725247-76740688	+	protein_coding	0.791573	1.73096	0.00117753	0.0104483	5.59688	4.80531	29.0309	28.0213	24.0806	50.9493	46.6059	44.8401
ENSRNOG00000052116	Atp11b	chr2:122368265-122444878	+	protein_coding	0.593188	1.50858	0.00151864	0.0118042	5.53064	4.93745	27.7731	30.5712	30.6725	43.6111	49.3564	42.9709
ENSRNOG00000052205	Fgf23	chr4:159622404-159630082	+	protein_coding	1.60573	3.04349	0.00725372	0.027915	1.73412	0.128398	0.087442	0.11132	0.080711	1.63557	4.1687	1.70281
ENSRNOG00000052357	Fosl2	chr6:25598936-25616995	-	protein_coding	1.50074	2.82988	9.21636e-05	0.00363468	3.92853	2.42779	3.86751	4.82569	4.49362	13.1135	15.025	14.6093
ENSRNOG00000052477	Tbrg4	chr14:86877627-86885584	-	protein_coding	1.0539	2.07614	0.0075312	0.0286194	4.07608	3.02218	8.9784	5.95757	6.72292	18.8338	16.1987	13.066
ENSRNOG00000052886	AABR07066144.2	chr9:3921406-3965939	-	protein_coding	0.97581	1.96675	0.000450159	0.00660075	2.12335	1.14754	1.37963	1.24903	1.03156	3.47731	3.6215	2.99739
ENSRNOG00000052981	AABR07058464.1	chr7:118473070-118474609	-	protein_coding	2.73284	6.64765	0.000429708	0.00648934	7.19494	4.4621	26.1543	21.1102	16.8339	183.282	143.46	117.155
ENSRNOG00000053272	Chi3l1	chr13:51022681-51030802	+	protein_coding	2.80629	6.99486	0.000400419	0.00629896	8.34194	5.53565	39.1507	64.4926	36.9581	351.77	307.757	312.63
ENSRNOG00000053560	Rhou	chr19:56435577-56441733	+	protein_coding	1.03646	2.05119	0.0230613	0.0583421	3.97313	2.93667	6.23437	9.5714	4.86874	18.2662	13.0139	13.3464
ENSRNOG00000053766	Ramp3	chr14:86922223-86939719	+	protein_coding	3.77311	13.6716	0.00273312	0.0160273	5.30639	1.53328	0.920176	2.08176	3.09781	73.2548	33.1076	23.4666
ENSRNOG00000053891	Phf11b	chr15:38647779-38709984	-	protein_coding	1.70751	3.26597	0.00229358	0.0145258	5.75086	4.04335	16.4179	11.3549	19.8291	61.2436	47.0845	51.1725
ENSRNOG00000054218	Il18rap	chr9:47225585-47258503	+	protein_coding	1.36447	2.57481	0.00450246	0.0211633	3.01981	1.65534	2.66192	1.62277	2.25428	9.16598	7.15206	5.43792
ENSRNOG00000054336	LOC499306	chr1:221558093-221594118	+	protein_coding	1.31234	2.48344	0.0248096	0.0613437	1.51157	0.199228	0.175402	0.035449	0.243384	3.72781	1.30432	1.12755
ENSRNOG00000054437	Rel	chr14:108491069-108509892	-	protein_coding	0.745853	1.67697	0.00445944	0.0210354	2.7942	2.04834	2.8601	3.35287	3.21175	7.06979	5.79276	5.08837
ENSRNOG00000054524	Tnip3	chr4:96449351-96492871	+	protein_coding	1.12833	2.18606	0.00605811	0.0251364	1.77292	0.644585	0.53105	0.622357	0.538094	3.55066	1.81412	2.11665
ENSRNOG00000054549	Lss	chr20:12842884-12870497	-	protein_coding	1.54116	2.91029	0.00492183	0.0222846	3.55256	2.0114	3.19183	3.21843	2.70611	14.1095	12.0735	7.17786
ENSRNOG00000054561	Isg20	chr1:140601791-140608946	+	protein_coding	2.8184	7.05382	0.000384418	0.00617242	6.88268	4.06428	16.2904	17.6349	13.5303	138.544	136.711	84.5075
ENSRNOG00000054962	Dao	chr12:48354196-48365784	-	protein_coding	1.02043	2.02852	0.0316508	0.0726531	1.26855	0.248125	0.167032	0	0.435478	1.78905	2.04215	0.648091
ENSRNOG00000055089	Slc44a1	chr5:70245843-70424112	+	protein_coding	0.880385	1.84087	0.0181849	0.0496832	5.29614	4.41576	18.876	20.5532	21.6979	30.1068	36.171	51.4607
ENSRNOG00000055103	Cftr	chr4:42692836-42860676	+	protein_coding	1.49503	2.8187	0.00783815	0.0293789	3.92943	2.4344	3.24496	5.3371	4.87109	16.5938	17.5229	9.85329
ENSRNOG00000055156	Tnf	chr20:5189390-5192000	-	protein_coding	2.50097	5.66066	0.0146714	0.0429826	2.92291	0.421938	0.070898	0.372628	0.635864	11.8479	8.8778	2.43683
ENSRNOG00000055471	Ywhah	chr14:83053041-83062424	-	protein_coding	0.869627	1.82719	0.00578465	0.0244596	7.32498	6.45535	103.706	72.7954	86.4512	170.487	163.79	144.866
ENSRNOG00000055581	Tarm1	chr1:64241865-64254564	+	protein_coding	0.611665	1.52802	0.0355359	0.0789704	0.726288	0.114623	0.0946	0	0.15947	0.285291	0.793857	0.963876
ENSRNOG00000055586	LOC100910650	chr11:71211768-71216983	+	protein_coding	1.43402	2.70199	0.00694187	0.0272363	2.46628	1.03226	1.03254	0.714552	1.45488	5.61157	5.41768	2.97731
ENSRNOG00000055716	Oscar	chr1:64182422-64188658	+	protein_coding	1.47215	2.77435	0.004028	0.0198237	2.4922	1.02005	1.01921	1.02763	1.03717	3.22672	6.65418	4.5053
ENSRNOG00000055786	AABR07035194.1	chr12:6623549-6630274	-	protein_coding	0.898983	1.86475	0.0166432	0.0468076	1.14534	0.246359	0.079978	0.235578	0.250833	1.95581	1.04669	0.789032
ENSRNOG00000056219	Olr1	chr4:163239849-163261958	-	protein_coding	3.23944	9.44428	0.000302947	0.00552481	7.38645	4.14701	16.5894	21.0158	13.3595	135.071	221.089	154.003
ENSRNOG00000056228	Atp10a	chr1:115975324-116141892	+	protein_coding	0.98982	1.98594	0.00631757	0.025808	4.20451	3.21469	9.01833	8.5516	7.36147	19.4413	20.0867	13.539
ENSRNOG00000056783	Cd69	chr4:163041141-163049084	-	protein_coding	1.7446	3.35101	0.0264537	0.0640661	4.53859	2.79399	6.52752	5.19139	6.15791	36.8625	26.9361	10.8681
ENSRNOG00000056819	Susd1	chr5:76416739-76632462	-	protein_coding	0.619211	1.53604	0.026621	0.0643426	1.37138	0.752169	0.497455	0.6202	0.969491	1.66353	1.16653	2.00094
ENSRNOG00000056853	Psma7	chr3:175420039-175426395	-	protein_coding	1.68804	3.22218	0.0050217	0.0225634	8.07659	6.38855	114.448	69.7497	70.9991	334.998	210.357	276.034
ENSRNOG00000056947	AABR07025272.1	chr16:31252480-31301880	-	protein_coding	1.39058	2.62185	0.00095216	0.00929457	2.88542	1.49483	1.80079	2.1226	1.5596	7.84416	6.10069	5.42441
ENSRNOG00000056984	Baz2b	chr3:45968825-46153371	-	protein_coding	1.07	2.09943	0.00558935	0.0240054	5.12593	4.05593	15.9251	15.4825	15.4936	44.8104	28.8039	30.1842
ENSRNOG00000057009	Ptp4a1	chr9:3896337-3899315	+	protein_coding	0.597187	1.51276	0.0101075	0.0342004	5.09693	4.49974	25.4637	20.7673	19.1009	32.6054	35.8287	31.3882
ENSRNOG00000057058	Cd300a	chr10:103438303-103450947	+	protein_coding	0.926856	1.90113	0.0312975	0.0721212	2.63768	1.71082	2.2984	1.8126	2.78109	5.51165	3.48065	7.26095
ENSRNOG00000057092	Slfn4	chr10:70411738-70435156	+	protein_coding	3.32572	10.0263	0.000214516	0.00475222	8.94428	5.61856	68.3743	41.5602	39.1663	540.049	458.26	480.053
ENSRNOG00000057153	Pla1a	chr11:64882288-64919579	+	protein_coding	1.98843	3.96804	0.000209462	0.00473014	8.10818	6.11975	70.6838	66.6086	68.385	226.104	282.312	325.534
ENSRNOG00000057335	Clec1b	chr4:163162211-163170466	+	protein_coding	1.39531	2.63045	0.00762319	0.028853	3.15406	1.75875	2.75311	1.70961	2.81078	7.84121	10.7719	5.7771
ENSRNOG00000057347	Cebpb	chr3:164424515-164425910	+	protein_coding	2.01859	4.05189	0.000360826	0.00603161	3.9618	1.94321	2.57053	2.59654	3.42869	13.9255	17.9536	12.3735
ENSRNOG00000057372	Mettl6	chr16:7573750-7588841	-	protein_coding	0.619449	1.53629	0.00971786	0.0333318	3.78231	3.16286	8.39032	6.88387	8.70346	13.019	14.273	11.1653
ENSRNOG00000057443	LOC497963	chr10:66189786-66313190	+	protein_coding	5.52609	46.0807	3.0757e-05	0.00277826	6.19218	0.666089	0.796951	0.517746	0.464883	66.0768	100.816	56.2409
ENSRNOG00000057724	AC118957.1	chr6:114478293-114488880	-	protein_coding	1.54714	2.92238	0.000922351	0.00916657	1.82935	0.282202	0.494436	0.203306	0	2.49607	2.81628	2.36391
ENSRNOG00000057774	RGD1560212	chr18:76725253-76731643	+	protein_coding	0.696037	1.62005	0.0319775	0.0732131	3.51806	2.82203	7.43265	5.44521	5.50643	13.5793	9.06089	9.25074
ENSRNOG00000057823	Ubc	chr12:36638457-36642734	+	protein_coding	1.25377	2.38464	0.0236756	0.0594773	2.56147	1.30769	1.32066	0.784955	2.66208	6.34667	3.76304	4.8784
ENSRNOG00000058157	Ldlrad3	chr3:91527657-91839009	-	protein_coding	0.889535	1.85258	0.0119236	0.0379774	3.4357	2.54616	4.99669	4.86317	4.6672	12.2362	10.5767	7.2679
ENSRNOG00000058245	AABR07029863.3	chr10:56529654-56530842	-	protein_coding	0.82665	1.77356	0.0348123	0.0777569	2.61278	1.78613	3.73609	1.93142	1.9549	6.29269	4.79835	4.41236
ENSRNOG00000058352	AABR07065699.3	chr6:139486775-139487576	+	protein_coding	0.722002	1.64947	0.00134099	0.0110996	0.722002	0	0	0	0	0.809142	0.463248	0.695284
ENSRNOG00000058388	Zfp36	chr1:85380095-85382607	+	protein_coding	2.06493	4.18414	0.00265658	0.0157938	8.343	6.27806	112.108	61.9864	64.6021	390.83	317.74	273.121
ENSRNOG00000058566	LOC103694381	chr20:5184515-5186503	+	protein_coding	1.99998	3.99993	0.00353864	0.0183991	3.37038	1.3704	1.50415	1.09431	2.29531	8.03565	13.8457	7.24508
ENSRNOG00000058643	Zfp281	chr13:53506925-53534353	+	protein_coding	1.66182	3.16415	0.000276756	0.0053217	5.09381	3.43199	9.87333	9.96893	9.54064	27.3586	35.1366	37.8628
ENSRNOG00000058677	Lsm8	chr4:45555077-45560943	+	protein_coding	1.38887	2.61873	0.0334256	0.0755413	6.33609	4.94722	39.7772	40.6986	16.2683	90.4518	82.9837	67.6554
ENSRNOG00000058692	Slc26a4	chr6:50808923-50846965	-	protein_coding	3.92393	15.1782	0.00550269	0.0237959	4.71711	0.793182	0.500625	1.74525	0.263167	45.779	34.0933	10.084
ENSRNOG00000058805	Aida	chr13:101698096-101724923	+	protein_coding	2.20755	4.61891	0.0226386	0.0576187	5.79929	3.59174	11.6826	9.73548	11.8716	38.1272	127.639	33.3107
ENSRNOG00000059073	Slamf1	chr13:90184569-90219217	+	protein_coding	2.51834	5.72924	0.00321597	0.0175431	2.78244	0.264096	0.13671	0.397365	0.090292	6.43825	9.42924	3.19827
ENSRNOG00000059097	Ddx60	chr16:29834086-29936307	-	protein_coding	1.95352	3.87317	1.72645e-05	0.00253197	5.29519	3.34167	9.08686	9.44787	8.88663	37.5691	42.4121	35.1561
ENSRNOG00000059207	Oas3	chr12:41316764-41336562	+	protein_coding	1.76023	3.38751	0.000345118	0.00588089	2.99637	1.23614	1.43185	1.18378	1.46151	5.76717	6.83986	8.57798
ENSRNOG00000059381	Mrps6	chr11:32211115-32263899	+	protein_coding	1.73517	3.32918	0.0198901	0.0528235	3.49998	1.76481	3.1432	2.03813	2.11775	6.85482	19.7184	7.89822
ENSRNOG00000059406	Ier5	chr13:72742211-72744303	-	protein_coding	1.88112	3.68361	0.000705204	0.00805006	7.12526	5.24414	39.6815	32.7538	38.6472	173.131	137.506	111.826
ENSRNOG00000059538	Clec2g	chr4:162934195-162943981	+	protein_coding	0.626748	1.54408	0.00691762	0.0271903	9.48447	8.85772	494.429	430.092	466.487	615.829	770.626	771.253
ENSRNOG00000059801	Lima1	chr7:141428063-141528397	-	protein_coding	0.671705	1.59295	0.0141571	0.0420289	5.21958	4.54787	21.2374	25.9529	20.3525	42.1438	36.4153	31.0467
ENSRNOG00000059857	Rnd1	chr7:140349138-140356209	-	protein_coding	3.71999	13.1773	7.66167e-06	0.00244591	5.88003	2.16005	3.4234	3.43267	3.55297	61.8551	64.4765	48.6333
ENSRNOG00000059968	Jak2	chr1:247398598-247458509	+	protein_coding	2.1054	4.30317	0.000206658	0.00472686	6.50348	4.39808	17.6435	21.7259	21.1213	105.865	89.6801	76.0686
ENSRNOG00000059984	Dll1	chr1:57318708-57327379	-	protein_coding	1.39541	2.63064	0.00144559	0.0115007	4.16179	2.76638	6.12914	6.45386	4.92748	14.8845	20.923	15.4663
ENSRNOG00000060379	Foxred1	chr8:36403493-36410612	-	protein_coding	0.660513	1.58064	0.00222397	0.01429	3.25714	2.59663	5.49744	5.18929	4.50308	8.52819	7.88491	9.32355
ENSRNOG00000060729	Qtrt2	chr11:61761613-61777942	+	protein_coding	0.996334	1.99492	0.00120968	0.0105851	2.2773	1.28097	1.2236	1.87209	1.24685	3.94296	3.83767	3.76414
ENSRNOG00000060821	Rnf114	chr3:164248731-164260497	+	protein_coding	1.89946	3.73074	6.12213e-05	0.00335624	5.41984	3.52038	11.0461	10.6817	9.73674	47.8866	39.2509	38.8696
ENSRNOG00000061039	Prpf31	chr1:64150786-64162461	-	protein_coding	0.593897	1.50932	0.00145355	0.0115199	4.27615	3.68225	11.9759	11.7836	11.7531	20.1929	18.421	16.6721
ENSRNOG00000061128	Pelo	chr2:47266738-47268625	-	protein_coding	2.58561	6.00267	0.0208057	0.0545184	3.83744	1.25184	0.452447	5.13052	0.516791	14.465	10.6414	15.2257
ENSRNOG00000061139	Taf1a	chr13:101790865-101806900	+	protein_coding	0.590349	1.50561	0.0123207	0.038683	2.95995	2.3696	5.08818	3.73481	3.78821	7.4534	6.75302	6.18785
ENSRNOG00000061146	Gar1	chr2:235250454-235257731	-	protein_coding	1.53086	2.88959	0.00138362	0.0112163	4.87072	3.33985	9.7617	10.1633	7.64002	32.1329	31.0171	22.6077
ENSRNOG00000061359	Psme1-ps1	chr17:52755621-52756367	+	protein_coding	0.641409	1.55985	0.00332539	0.017885	0.949648	0.308239	0.220716	0.277848	0.216953	0.695801	0.97793	1.14799
ENSRNOG00000061394	Clec4e	chr4:156270920-156276304	-	protein_coding	2.11413	4.3293	0.000648764	0.00778463	2.83987	0.725732	1.03144	0.60486	0.38727	5.02552	6.06004	7.62688
ENSRNOG00000061442	AABR07068214.1	chr9:91001828-91004983	+	protein_coding	1.79559	3.47157	0.000155294	0.00422966	4.32258	2.52699	5.44568	4.62928	4.27687	17.0902	18.4747	21.7385
ENSRNOG00000061582	Scamp1	chr2:23857995-23941084	-	protein_coding	2.23145	4.69607	0.0162162	0.0459138	4.93445	2.703	5.58301	6.97073	4.26169	52.0962	14.2106	34.4032
ENSRNOG00000061595	Tfec	chr4:44065045-44136815	-	protein_coding	1.25099	2.38005	0.000318867	0.00563835	2.00055	0.749559	0.668573	0.694319	0.681042	2.78427	3.64052	2.64863
ENSRNOG00000061739	Klrk1	chr4:163393217-163403653	-	protein_coding	1.20878	2.31143	0.0147846	0.0432138	4.4055	3.19671	7.27575	8.0417	9.30057	26.194	23.198	13.4647
ENSRNOG00000061883	Aqp9	chr8:77559624-77599781	-	protein_coding	1.25368	2.3845	0.00123816	0.010704	2.09004	0.836352	0.886525	0.990416	0.515983	3.05966	2.91368	3.85753

## Sheet: down_L_vs_C
#log2(fold_change) <= - 0.58 #p-value cut-off <= 0.05 #q-value cut-off <= 1.00 #Gene biotype: protein_coding #Condition pairs: down_L_vs_C Column A: Track_id, The database name in gene level. Column B: Gene_Name, The name of gene. Column C: Locus, The genomic coordinates of gene. Column D: Strand, Strand of the gene. Column E: Gene_Type, The biological type of gene. Column F: log2(fold_change), i…
down_L_vs_C(gene_level)
Annotation					DE Statistic				FPKM
Track_id	Gene_Name	Locus	Strand	Gene_Type	log2(fold_change)	Fold_Change	p_value	q_value	L_FPKM	C_FPKM	C1	C2	C3	L1	L2	L3
ENSRNOG00000000040	RGD1304622	chr13:72865719-72893187	-	protein_coding	-0.976325	0.508273	0.0325392	0.0742069	0.886172	1.8625	1.95866	3.18289	2.88535	0.311734	0.968503	1.44518
ENSRNOG00000000042	Xpr1	chr13:72918552-73056785	-	protein_coding	-0.841484	0.558069	0.0099959	0.0339574	3.10923	3.95071	13.3744	14.554	15.5355	5.8013	8.4645	8.98215
ENSRNOG00000000043	Idua	chr14:2042411-2056762	-	protein_coding	-0.908897	0.532592	0.0103791	0.0347635	3.94813	4.85702	32.1969	26.4599	25.7014	18.0828	11.5857	14.3107
ENSRNOG00000000054	Abhd8	chr16:19866022-19872774	-	protein_coding	-1.8496	0.27747	0.00312095	0.0172791	0.952356	2.80195	6.68314	5.49189	5.79997	0.607078	0.577699	1.85761
ENSRNOG00000000068	Ppp2r5a	chr13:110033550-110077946	-	protein_coding	-0.896343	0.537247	0.0476319	0.0980899	4.21661	5.11295	26.8701	27.4998	51.1765	15.1714	17.7075	20.2429
ENSRNOG00000000081	Antxr2	chr14:13192347-13274978	+	protein_coding	-1.78469	0.290239	0.00645403	0.0261477	2.97894	4.76363	25.4094	25.5561	27.58	3.96787	8.13792	9.79533
ENSRNOG00000000082	Hltf	chr2:104854572-104914173	+	protein_coding	-1.07206	0.475638	0.000601444	0.00745678	2.20353	3.27559	8.26521	8.43322	9.39054	3.92386	3.03063	3.92385
ENSRNOG00000000091	LOC103691556	chr2:144191846-144212138	+	protein_coding	-2.09415	0.234206	4.83706e-05	0.00312011	0.402362	2.49651	4.77395	4.56956	4.58835	0.219013	0.228876	0.541177
ENSRNOG00000000105	Cplx2	chr17:10756285-10818835	-	protein_coding	-2.21951	0.214714	0.000239175	0.00499286	1.22362	3.44314	8.32923	10.2289	11.2824	1.06272	1.80361	1.20234
ENSRNOG00000000108	Aga	chr16:41222238-41234095	-	protein_coding	-1.36823	0.387366	0.000118679	0.00389319	4.13458	5.50281	46.0705	42.5646	44.462	15.5411	18.7903	15.5531
ENSRNOG00000000142	Plxdc2	chr17:83221827-83610272	+	protein_coding	-2.37019	0.19342	9.17061e-05	0.00363468	3.11171	5.48191	41.2185	42.9247	47.1331	8.24523	6.15504	8.76397
ENSRNOG00000000145	Pik3r3	chr5:135074297-135142488	+	protein_coding	-1.76225	0.294788	0.000105885	0.0038093	2.43566	4.19791	15.3161	18.8861	18.0515	3.88221	4.59284	4.7993
ENSRNOG00000000151	Ldlrap1	chr5:152966591-152987211	-	protein_coding	-1.9138	0.265392	0.014234	0.0421514	2.28671	4.20051	17.9547	16.0113	18.2746	1.98075	3.41885	7.82
ENSRNOG00000000156	LOC100911486	chr5:171472273-171620947	+	protein_coding	-1.80864	0.285459	0.00318141	0.0174434	1.5587	3.36735	10.0177	10.7399	7.49693	1.82847	1.23863	3.03754
ENSRNOG00000000157	Atg12	chr18:40721800-40732126	-	protein_coding	-1.90751	0.266551	0.0314042	0.0722629	1.98229	3.88981	6.21455	19.7923	20.7138	4.5485	2.85401	1.88471
ENSRNOG00000000158	Cdo1	chr18:40701984-40716686	-	protein_coding	-1.79801	0.28757	0.00258979	0.0155736	5.59339	7.39141	166.365	138.101	202.287	37.8968	43.8633	63.4958
ENSRNOG00000000161	Chm	chrX:84666900-84821775	-	protein_coding	-0.87004	0.547132	0.00855657	0.030901	2.54409	3.41413	8.31167	9.21173	11.7391	3.93288	5.40055	5.28382
ENSRNOG00000000165	Pfkfb1	chrX:23092159-23144324	-	protein_coding	-1.40169	0.378485	0.00131001	0.0109684	0.957611	2.3593	4.59666	3.94329	3.88336	0.988211	1.33196	0.579886
ENSRNOG00000000168	Gatm	chr3:114711562-114728410	-	protein_coding	-2.58181	0.167031	0.00098467	0.00946196	1.6972	4.27901	23.7358	19.5541	13.3916	2.08459	1.65329	3.16627
ENSRNOG00000000172	Sqrdl	chr3:114900343-114939370	+	protein_coding	-1.51998	0.348691	0.0104463	0.0348922	4.04135	5.56133	49.1583	47.1124	42.6292	12.6717	11.5985	24.9156
ENSRNOG00000000185	Mpst	chr7:119626637-119631425	+	protein_coding	-0.965983	0.511929	0.000110171	0.00384226	3.38515	4.35113	20.5331	18.9018	18.8364	9.26186	8.94125	10.1796
ENSRNOG00000000190	Ep300	chr7:122818975-122861296	+	protein_coding	-1.25967	0.417638	0.00957892	0.033052	2.7558	4.01548	13.346	15.3629	17.0196	4.02693	5.64843	8.21967
ENSRNOG00000000231	Kctd17	chr7:119647375-119658148	+	protein_coding	-1.23318	0.425378	0.00488357	0.0221805	1.04252	2.2757	3.67017	4.36311	3.53328	0.640104	0.98974	1.67806
ENSRNOG00000000237	RGD1310429	chr10:67739103-67751002	-	protein_coding	-1.27505	0.41321	0.00300022	0.016896	1.69698	2.97204	5.83065	7.76589	7.06785	1.63048	2.29777	2.92893
ENSRNOG00000000246	Amz2	chr10:97710905-97721440	+	protein_coding	-1.08246	0.472224	0.0187837	0.0508742	2.55097	3.63343	8.84937	9.97585	16.6794	5.72896	4.11181	4.85109
ENSRNOG00000000264	Def8	chr19:56243408-56259196	+	protein_coding	-0.828132	0.563258	0.0354933	0.0789144	1.40091	2.22905	2.43913	3.80855	5.23111	1.38475	1.59096	1.98022
ENSRNOG00000000274	Phyhipl	chr20:19318250-19358719	+	protein_coding	-2.15581	0.224408	8.24593e-05	0.00362032	0.465186	2.62099	4.28905	5.09067	6.22687	0.397949	0.338966	0.405542
ENSRNOG00000000275	Fam13c	chr20:19360230-19479325	-	protein_coding	-2.44432	0.183733	0.00281343	0.0162509	1.29119	3.73551	11.6576	11.5463	13.881	0.753689	1.08012	3.01812
ENSRNOG00000000277	Tet1	chr20:27366213-27437427	+	protein_coding	-0.843744	0.557196	4.39151e-05	0.00312011	0.00805833	0.851803	0.749285	0.753427	0.916488	0	0	0.016898
ENSRNOG00000000281	Prodh1	chr11:87058616-87075785	+	protein_coding	-0.99843	0.500545	0.00982237	0.0336031	2.41104	3.40947	12.5734	9.43186	7.47237	4.5369	3.71458	4.76335
ENSRNOG00000000288	Scarf2	chr11:87722350-87733734	+	protein_coding	-1.37036	0.386795	0.0120356	0.038199	2.71345	4.08381	15.7561	16.4227	15.7018	6.83459	3.25675	7.46052
ENSRNOG00000000302	Sesn1	chr20:46667121-46758305	+	protein_coding	-1.9314	0.262174	0.000819759	0.00862902	2.39009	4.32149	19.7567	18.0187	19.2469	4.18968	3.09648	5.77504
ENSRNOG00000000303	Cep57l1	chr20:46610146-46666830	-	protein_coding	-0.623864	0.64893	0.0117805	0.0377032	1.78197	2.40584	4.27446	4.405	4.22052	1.97488	2.29867	3.14451
ENSRNOG00000000307	Mical1	chr20:46199981-46211930	+	protein_coding	-1.22658	0.427329	0.000790963	0.00849017	2.1772	3.40378	9.73729	9.70619	9.31305	3.31824	2.9672	4.40024
ENSRNOG00000000312	Fig4	chr20:45922806-46044738	-	protein_coding	-1.69929	0.307937	0.00333689	0.0179279	1.91032	3.60961	11.8975	9.80605	12.0507	2.11694	2.17441	4.36787
ENSRNOG00000000316	Sobp	chr20:47750762-47910375	-	protein_coding	-0.623774	0.648971	0.029215	0.0685059	0.17072	0.794493	0.34352	0.9906	0.951061	0.074454	0.14408	0.160195
ENSRNOG00000000327	Hace1	chr20:50652745-50783937	+	protein_coding	-0.748985	0.595022	0.0136868	0.0411595	2.8006	3.54958	9.98726	10.6752	11.5153	4.55445	6.38375	7.24661
ENSRNOG00000000341	Nid2	chr15:4894213-4951917	-	protein_coding	-0.730594	0.602656	0.0099148	0.0337655	2.1198	2.8504	5.69101	5.63666	7.44743	3.76729	3.60758	2.7379
ENSRNOG00000000383	Mypn	chr20:26988774-27074138	+	protein_coding	-0.696913	0.616891	1.91807e-05	0.00253197	0.042552	0.739465	0.635956	0.710172	0.663381	0.034615	0	0.055965
ENSRNOG00000000390	LOC100910755	chr20:27220707-27247309	-	protein_coding	-1.32319	0.399651	0.00257025	0.0155229	0.907269	2.23045	3.38081	3.66001	4.06244	0.555384	0.760813	1.40877
ENSRNOG00000000395	Kif1bp	chr20:32191734-32211453	-	protein_coding	-1.03708	0.487312	0.00100842	0.00961042	1.89443	2.93151	7.00457	6.24465	6.65709	3.25314	2.24023	2.72869
ENSRNOG00000000406	Ros1	chr20:33100191-33323367	-	protein_coding	-0.669472	0.628737	0.00834464	0.0303922	1.08042	1.74989	1.85292	2.74226	2.56358	1.08747	0.964351	1.3061
ENSRNOG00000000417	Numa1	chr1:167051209-167091453	+	protein_coding	-1.18025	0.441275	0.00560933	0.0240599	3.83366	5.01391	30.5957	30.4114	32.9859	10.1158	13.023	17.5934
ENSRNOG00000000420	Nelfe	chr20:4530342-4536209	+	protein_coding	-0.616148	0.652411	0.00535013	0.023453	3.8337	4.44985	22.3726	21.8656	18.5309	12.1228	13.0235	14.7505
ENSRNOG00000000421	Skiv2l	chr20:4519474-4530126	-	protein_coding	-0.674909	0.626372	0.0128355	0.0396487	2.89616	3.57107	10.6972	11.2294	10.7357	6.16441	5.30891	8.12761
ENSRNOG00000000433	Prrt1	chr20:4392626-4396250	+	protein_coding	-1.72926	0.301606	0.00268935	0.0158731	0.533791	2.26305	3.44671	4.71434	3.35246	0.723764	0.0553375	0.667985
ENSRNOG00000000435	Ppt2	chr20:4381455-4401610	-	protein_coding	-1.31614	0.401608	0.000259941	0.00520534	1.74029	3.05643	7.58264	6.44509	8.01031	2.06162	2.36891	2.61574
ENSRNOG00000000436	Egfl8	chr20:4378206-4380600	-	protein_coding	-0.904038	0.534389	0.00146371	0.0115626	1.19368	2.09771	3.93523	3.14921	2.82958	1.29858	1.16879	1.4006
ENSRNOG00000000442	Notch4	chr20:4329811-4353785	+	protein_coding	-2.04205	0.242818	0.00590521	0.0247491	2.33109	4.37314	21.3089	17.7673	20.2551	2.75175	3.02037	7.44667
ENSRNOG00000000454	RT1-DOb	chr20:4020317-4026346	+	protein_coding	-1.08386	0.471765	0.0082451	0.0302279	0.363878	1.44774	2.31693	1.2382	1.73402	0.0546758	0.344117	0.503345
ENSRNOG00000000483	Syngap1	chr20:5535432-5564437	+	protein_coding	-1.15961	0.447634	0.0169786	0.0473938	1.11998	2.27958	4.92389	3.07132	3.74599	0.591923	1.23191	1.88962
ENSRNOG00000000495	Uhrf1bp1	chr20:7431355-7471900	+	protein_coding	-1.05629	0.480866	0.0105213	0.03503	1.51752	2.57381	4.73464	4.10114	6.21456	1.50816	1.54439	2.67719
ENSRNOG00000000498	Anks1a	chr20:7484550-7636497	+	protein_coding	-1.51808	0.349149	0.00232742	0.0146463	3.51391	5.03199	32.9395	29.6787	32.6358	8.76446	8.91555	14.3962
ENSRNOG00000000504	Fance	chr20:7895083-7906142	+	protein_coding	-0.604693	0.657611	0.0331409	0.0751432	2.6842	3.28889	9.40318	7.11191	10.063	5.54594	4.4464	6.44715
ENSRNOG00000000527	Mtch1	chr20:6937348-6961143	-	protein_coding	-0.686453	0.62138	0.0028673	0.0164331	4.98448	5.67094	52.6393	49.7594	47.5696	30.3461	27.3297	34.7282
ENSRNOG00000000541	Glo1	chr20:9273594-9291610	-	protein_coding	-1.32569	0.398957	0.000300684	0.0055143	3.56543	4.89113	27.2493	28.6807	30.1634	11.3449	9.27214	12.0845
ENSRNOG00000000552	Col13a1	chr20:31456852-31598118	-	protein_coding	-1.14775	0.451329	0.000219149	0.00482891	4.42821	5.57596	46.4272	47.0889	46.5909	18.8678	19.6344	23.3408
ENSRNOG00000000568	Slc29a3	chr20:30287424-30327361	-	protein_coding	-1.27742	0.412533	0.00891198	0.031681	1.60082	2.87823	6.94292	5.95226	6.19778	1.92821	1.25674	3.22276
ENSRNOG00000000572	Chst3	chr20:29731816-29738506	-	protein_coding	-1.05359	0.481769	0.000948542	0.0092706	2.48983	3.54341	11.8208	9.89702	10.3448	4.97373	5.04869	3.9049
ENSRNOG00000000583	Cdk19	chr20:45458558-45598798	+	protein_coding	-1.44809	0.366507	0.0033677	0.0180459	3.08888	4.53697	23.0224	21.1388	22.5246	5.38931	7.70901	10.0692
ENSRNOG00000000593	Rev3l	chr20:44803666-44961382	+	protein_coding	-0.980089	0.506948	0.0135245	0.0408912	2.78171	3.7618	12.4263	12.3221	12.9546	4.39238	5.4766	8.31127
ENSRNOG00000000598	Tube1	chr20:44220840-44238830	+	protein_coding	-0.629171	0.646548	0.0207938	0.0545107	0.816614	1.44578	1.87363	1.70521	1.60041	0.506137	0.649218	1.19955
ENSRNOG00000000633	Rhobtb1	chr20:20638579-20713128	-	protein_coding	-1.07859	0.473492	7.1537e-05	0.00341149	2.32762	3.40621	10.3708	9.01814	9.46008	3.7959	4.07287	4.19907
ENSRNOG00000000636	Rtkn2	chr20:21932878-22004279	-	protein_coding	-2.99319	0.125592	0.00403414	0.0198473	1.60687	4.60006	21.4634	21.3127	27.4603	0.980724	1.39334	4.96102
ENSRNOG00000000658	Acacb	chr12:48127149-48238887	-	protein_coding	-1.4915	0.355642	0.000197902	0.00470751	1.19038	2.68188	4.99922	5.89378	5.38891	1.43669	0.991437	1.44936
ENSRNOG00000000700	Tmem119	chr12:48598647-48605704	+	protein_coding	-3.03954	0.121621	4.44992e-05	0.00312011	0.448206	3.48774	9.74167	12.196	8.95942	0.318057	0.230633	0.565695
ENSRNOG00000000704	Cmklr1	chr12:48789261-48793553	+	protein_coding	-1.43582	0.369638	0.0443386	0.0933839	0.423176	1.85899	2.23736	4.15476	1.86047	0	0	1.41083
ENSRNOG00000000729	Tmlhe	chr20:237506-284943	+	protein_coding	-1.64823	0.319032	0.00108787	0.0100403	1.61513	3.26335	11.3124	7.81609	7.15614	1.77765	2.18052	2.25409
ENSRNOG00000000778	Znrd1as1	chr20:2077072-2088389	-	protein_coding	-0.597939	0.660697	0.0189682	0.0512645	0.882368	1.48031	1.58158	2.06302	1.74673	0.744529	0.613937	1.22481
ENSRNOG00000000802	Tbc1d32	chr20:37465278-37700937	-	protein_coding	-0.859153	0.551276	0.0079896	0.0296789	0.533652	1.39281	1.2311	1.72739	1.97552	0.219042	0.555744	0.599481
ENSRNOG00000000842	Ddah2	chr20:5049496-5052585	+	protein_coding	-1.32067	0.400348	0.00556875	0.023987	3.63278	4.95345	31.4211	31.9275	26.8629	11.9397	8.23026	14.9803
ENSRNOG00000000866	Rbmx	chrX:159884885-159891326	-	protein_coding	-0.866111	0.548624	0.000371489	0.00610799	3.00048	3.86659	12.3868	13.9898	14.4671	7.25908	7.25725	6.51512
ENSRNOG00000000869	Arhgef6	chrX:159723866-159841072	-	protein_coding	-1.94988	0.258838	0.000589592	0.00740453	2.27829	4.22817	15.1197	18.62	19.8142	2.94752	3.96383	4.82587
ENSRNOG00000000875	Fhl1	chrX:159112880-159172524	+	protein_coding	-2.71402	0.152405	0.000489424	0.00681043	4.17675	6.89077	120.706	124.012	108.83	14.0727	14.2259	24.7757
ENSRNOG00000000879	Slc9a6	chrX:158978755-159045044	+	protein_coding	-0.854909	0.5529	0.0057924	0.0244596	3.56353	4.41844	19.9405	19.9761	21.2604	8.89232	10.615	13.3836
ENSRNOG00000000885	Auts2	chr12:28212333-28251816	+	protein_coding	-0.679786	0.624258	0.0117409	0.0376097	0.845245	1.52503	2.28424	2.11479	1.33011	0.835253	0.782427	0.772656
ENSRNOG00000000894	Fry	chr12:5573729-5822874	-	protein_coding	-2.40843	0.18836	1.34603e-05	0.00253197	1.16248	3.57092	10.7873	10.6885	11.1812	0.997252	1.2573	1.48775
ENSRNOG00000000905	Tex26	chr12:6671940-6703979	-	protein_coding	-0.680693	0.623866	0.00346932	0.0182564	1.44212	2.12282	3.17005	3.61588	3.29238	1.6924	1.41854	2.08088
ENSRNOG00000000913	Gusb	chr12:30198822-30227771	+	protein_coding	-1.03298	0.488701	0.00158638	0.0120348	2.63968	3.67266	12.4206	12.8671	10.1424	6.06778	4.70658	5.0008
ENSRNOG00000000921	Ubl3	chr12:7865938-7911525	+	protein_coding	-0.607568	0.656302	0.0100156	0.0339922	3.37724	3.98481	14.7194	13.6782	16.2001	11.1544	8.42505	8.79342
ENSRNOG00000000922	Sumf2	chr12:30464676-30491102	-	protein_coding	-0.59844	0.660468	0.0475765	0.0980035	1.52839	2.12683	3.69159	3.49856	2.9475	1.31546	2.71314	1.79186
ENSRNOG00000000936	Stx2	chr12:31335372-31360254	+	protein_coding	-1.86594	0.274345	0.00217732	0.014136	1.90389	3.76983	13.0102	12.4286	12.4903	2.10219	2.12483	4.40616
ENSRNOG00000000937	Slc46a3	chr12:8725517-8741951	+	protein_coding	-0.590368	0.664174	0.0126301	0.0392563	1.91621	2.50658	4.3318	5.26019	4.49798	2.22734	3.24315	2.92623
ENSRNOG00000000955	Lnx2	chr12:9728486-9793428	+	protein_coding	-0.695989	0.617286	0.000265615	0.0052342	2.42958	3.12557	8.07528	7.10709	8.03539	4.3599	4.26543	4.5404
ENSRNOG00000000963	Tmem132c	chr12:32808022-33016885	-	protein_coding	-1.23173	0.425807	0.00490847	0.0222622	1.04508	2.27681	3.14812	5.10838	3.49142	0.942053	1.48781	0.818537
ENSRNOG00000000975	Mcoln1	chr12:2054680-2068682	+	protein_coding	-1.18992	0.438327	0.0104518	0.0349026	2.81935	4.00927	18.7531	16.1227	11.3459	5.27272	5.29177	7.9104
ENSRNOG00000000977	Pnpla6	chr12:2069959-2097904	+	protein_coding	-1.01675	0.494228	0.0201848	0.0534304	2.08472	3.10147	7.38118	7.76743	7.60455	2.20159	2.93244	5.0626
ENSRNOG00000000983	Zfp394	chr12:11179329-11187380	+	protein_coding	-1.82165	0.282898	0.0150454	0.0436736	1.36126	3.18291	9.13311	7.89377	7.31044	3.70408	0.812341	0.988955
ENSRNOG00000001004	Ncor2	chr12:36871999-37033701	+	protein_coding	-1.454	0.365007	0.00106657	0.00991429	2.9387	4.39271	19.5887	19.7185	20.7281	5.3953	6.36984	8.56302
ENSRNOG00000001010	Tecpr1	chr12:12374790-12402552	+	protein_coding	-1.32094	0.400274	0.00985204	0.0336571	2.63999	3.96093	14.9992	13.7424	15.0106	3.84008	4.45646	8.1703
ENSRNOG00000001055	Rilpl1	chr12:37490584-37528784	+	protein_coding	-1.70242	0.30727	0.0033706	0.0180548	2.19141	3.89383	14.1166	14.0346	13.4523	2.53302	3.08712	5.59902
ENSRNOG00000001065	Cyth3	chr12:12877559-12945192	-	protein_coding	-2.19613	0.218222	0.00463312	0.0215337	3.18922	5.38535	26.4113	48.9336	52.3494	7.54494	6.16663	11.3915
ENSRNOG00000001072	Cers4	chr12:4439750-4474729	-	protein_coding	-2.5395	0.172002	0.000243849	0.00504451	1.31168	3.85118	12.6979	12.8489	14.8451	1.25075	1.09987	2.23629
ENSRNOG00000001073	LOC100910427	chr12:37677019-37699616	-	protein_coding	-0.592058	0.663396	0.00847442	0.0306904	1.2256	1.81766	2.75776	2.46325	2.36588	1.02246	1.38975	1.64605
ENSRNOG00000001090	Stard13	chr12:1023531-1195591	-	protein_coding	-1.21195	0.431685	0.00730584	0.0280465	2.83514	4.04709	16.5733	14.4754	15.611	4.67087	5.55695	8.77324
ENSRNOG00000001092	Kl	chr12:943006-987551	+	protein_coding	-1.88328	0.271067	0.00454741	0.0213195	0.756815	2.64009	4.92615	4.99037	5.82364	0.154331	0.674769	1.49567
ENSRNOG00000001098	Pds5b	chr12:660011-794042	+	protein_coding	-1.17966	0.441457	0.00929278	0.0325415	1.94087	3.12053	7.19	7.15191	8.85311	2.02938	2.56672	4.2379
ENSRNOG00000001111	Brca2	chr12:504007-544748	+	protein_coding	-0.613496	0.653611	2.95796e-06	0.00212831	0.467412	1.08091	1.0726	1.14725	1.12696	0.373643	0.39243	0.381871
ENSRNOG00000001129	Fbxo21	chr12:44246508-44279002	-	protein_coding	-1.60774	0.328112	0.00120096	0.0105359	1.84123	3.44897	10.0123	9.85055	9.89927	1.93967	2.36822	3.64615
ENSRNOG00000001149	Pxn	chr12:46797954-46845080	-	protein_coding	-1.29745	0.406844	0.000614931	0.00755316	3.43938	4.73684	26.5501	24.5265	25.9572	8.90913	8.93567	11.967
ENSRNOG00000001152	Glp1r	chr20:9586075-9626228	+	protein_coding	-3.52717	0.0867392	3.02817e-05	0.00275242	0.993127	4.5203	22.9169	18.886	24.4089	0.841483	0.798154	1.38171
ENSRNOG00000001182	Ndufv3	chr20:10265806-10275304	+	protein_coding	-0.801222	0.573863	0.0290641	0.0682621	4.39156	5.19278	40.0125	34.652	32.462	14.8382	26.0877	20.5526
ENSRNOG00000001190	Git2	chr12:47590154-47631119	+	protein_coding	-0.71681	0.608441	0.0012722	0.0108514	4.43027	5.14708	36.0919	32.0133	35.3332	19.5934	19.4298	22.8197
ENSRNOG00000001191	Tchp	chr12:47638274-47653638	-	protein_coding	-1.01109	0.496172	0.0157109	0.0449948	2.4465	3.45759	10.8299	9.12584	10.0689	3.03951	4.55354	6.21964
ENSRNOG00000001227	Adarb1	chr20:11972381-12101047	+	protein_coding	-1.79311	0.288549	0.00140811	0.0113201	3.37121	5.16433	34.2637	36.3142	34.0469	12.6516	9.22405	6.93787
ENSRNOG00000001228	Pofut2	chr20:12117811-12128747	-	protein_coding	-0.620064	0.650642	0.00707361	0.0274911	3.62993	4.25	19.2428	18.3379	16.5973	10.256	10.7735	13.3175
ENSRNOG00000001229	Col18a1	chr20:12225202-12332858	+	protein_coding	-0.880114	0.543325	0.000202721	0.00472464	2.67883	3.55894	10.3933	10.1932	11.8363	5.25129	5.31947	5.64619
ENSRNOG00000001235	Gna12	chr12:15890170-15971212	+	protein_coding	-0.993896	0.50212	0.0123396	0.0387088	1.9682	2.96209	5.37134	6.52359	8.87142	2.27769	3.53674	3.02852
ENSRNOG00000001237	Cabin1	chr20:13836030-13963003	+	protein_coding	-0.895813	0.537444	0.00259028	0.0155736	2.69064	3.58645	11.1855	11.2392	10.6222	4.67336	5.15938	6.70032
ENSRNOG00000001239	Ddt	chr20:13827153-13829622	+	protein_coding	-0.726833	0.604229	0.0237295	0.0595406	4.29294	5.01978	33.0445	35.4207	26.5369	18.5302	15.1185	22.9266
ENSRNOG00000001247	Clip1	chr12:38345456-38452652	+	protein_coding	-1.17244	0.443669	0.00345097	0.0182374	3.84604	5.01848	30.2346	30.9474	33.1248	10.5843	13.2081	17.0681
ENSRNOG00000001249	Col6a1	chr20:12658065-12675561	+	protein_coding	-1.8723	0.273138	0.00164862	0.0122159	5.25502	7.12732	117.314	175.243	130.057	33.4011	32.1407	47.845
ENSRNOG00000001254	Col6a2	chr20:12773427-12801180	+	protein_coding	-1.76715	0.293788	0.00220088	0.0142192	5.11536	6.88251	102.309	141.232	110.788	29.6484	28.2875	45.4022
ENSRNOG00000001255	Mlxip	chr12:38567247-38638536	-	protein_coding	-0.588697	0.664943	0.00215076	0.01402	3.45143	4.04012	15.9635	14.683	15.736	8.85224	10.4029	10.652
ENSRNOG00000001256	Atxn2	chr12:40266662-40332612	-	protein_coding	-1.10225	0.465789	0.014734	0.0431226	3.05164	4.15389	16.8893	15.428	18.1936	4.93949	7.69849	10.0334
ENSRNOG00000001260	Nudt1	chr12:16391578-16395029	-	protein_coding	-0.935535	0.522848	0.00684165	0.0270082	1.25701	2.19255	3.57806	3.55134	3.58401	1.76704	0.85821	1.65512
ENSRNOG00000001265	Mad1l1	chr12:16410083-16719824	+	protein_coding	-1.3993	0.379113	0.00527019	0.0231764	1.5335	2.9328	5.44537	6.71687	7.95146	1.16157	2.49049	2.21539
ENSRNOG00000001270	Hvcn1	chr12:39822637-39850567	-	protein_coding	-1.12222	0.459386	0.00134942	0.0111062	2.37215	3.49437	11.324	10.069	9.49232	3.38193	4.44558	4.81509
ENSRNOG00000001271	Card6	chr2:54810110-54824033	-	protein_coding	-1.09765	0.467276	0.0128877	0.0397172	2.9038	4.00145	13.1489	21.6441	11.8232	6.42574	6.1422	6.90354
ENSRNOG00000001275	Tmem184a	chr12:16912249-16921426	+	protein_coding	-0.629248	0.646513	0.0402676	0.0868861	1.69537	2.32462	4.09939	4.75848	3.28068	2.75936	1.56745	2.51929
ENSRNOG00000001276	Pcnt	chr20:12944786-13038431	+	protein_coding	-1.3269	0.398623	0.00211276	0.0139157	2.19061	3.51752	11.0488	9.40841	10.9759	2.84452	3.29161	4.7658
ENSRNOG00000001294	Ift81	chr12:39423596-39506890	+	protein_coding	-1.2382	0.423902	0.0094276	0.032769	2.25608	3.49428	10.6718	9.75643	10.3982	2.37927	4.16149	5.24949
ENSRNOG00000001299	Sun1	chr12:17488487-17522534	-	protein_coding	-1.54943	0.341645	0.00718166	0.0277405	3.54356	5.09299	32.1471	32.4319	34.8774	6.96194	11.0823	15.481
ENSRNOG00000001303	Specc1l	chr20:14287457-14393793	-	protein_coding	-1.55982	0.339194	0.00148695	0.0116711	3.66997	5.22978	37.0121	35.892	36.68	9.17125	11.3481	15.4186
ENSRNOG00000001311	Rab36	chr20:14557740-14573519	-	protein_coding	-0.889544	0.539785	0.0250356	0.061742	0.809869	1.69941	2.4128	2.34892	1.99714	0.413068	0.548883	1.46152
ENSRNOG00000001333	Azgp1	chr12:19196611-19202647	+	protein_coding	-1.32493	0.399168	0.000719818	0.00814001	0.965053	2.28998	3.55094	4.41981	3.74215	0.840193	0.759499	1.29761
ENSRNOG00000001337	Setd1b	chr12:38845621-38869346	-	protein_coding	-0.615634	0.652643	0.00844323	0.0306439	2.64735	3.26298	8.65864	8.35858	8.7868	4.5644	4.94986	6.42794
ENSRNOG00000001341	Zfp113	chr12:19288403-19294888	-	protein_coding	-0.758551	0.59109	0.000675744	0.00790797	1.46336	2.22191	3.40833	3.92581	3.67554	1.61824	2.01525	1.6559
ENSRNOG00000001344	Aldh2	chr12:40466495-40498752	+	protein_coding	-1.09209	0.469081	1.1198e-05	0.00251647	6.6059	7.69799	206.746	209.101	204.125	91.3311	99.8854	98.208
ENSRNOG00000001352	Hectd4	chr12:40713841-40822159	-	protein_coding	-0.763595	0.589027	0.000403148	0.00630428	2.34633	3.10993	7.53703	7.36941	8.00627	4.20542	3.6755	4.40341
ENSRNOG00000001355	Taf6	chr12:19320271-19328637	-	protein_coding	-0.860771	0.550658	0.024992	0.0616869	3.27829	4.13906	16.1808	15.5555	18.2289	6.13438	9.21522	11.5309
ENSRNOG00000001375	Gal3st4	chr12:19583110-19592000	-	protein_coding	-1.61518	0.326425	2.48882e-05	0.00260395	0.153741	1.76892	2.56004	2.38707	2.28256	0.04483	0.08585	0.213462
ENSRNOG00000001376	Mettl7a	chr7:141973553-141981432	+	protein_coding	-2.83871	0.139786	0.000248611	0.0050995	2.09965	4.93836	34.3972	29.8917	25.362	3.93266	2.27237	3.87787
ENSRNOG00000001385	Plbd2	chr12:41600005-41619186	+	protein_coding	-0.971954	0.509815	0.00014052	0.0041368	3.72242	4.69437	25.7331	26.3468	22.7403	11.9033	12.6647	12.043
ENSRNOG00000001402	Lrch4	chr12:22127393-22138382	-	protein_coding	-0.803573	0.572928	0.0275558	0.0658359	3.68427	4.48784	23.1558	21.0278	20.2292	12.3662	8.57853	15.5928
ENSRNOG00000001410	Gigyf1	chr12:22236165-22245100	-	protein_coding	-0.90705	0.533274	0.0215406	0.0557511	3.17509	4.08214	16.6845	14.2183	17.0541	7.72641	5.93959	11.168
ENSRNOG00000001419	Cldn15	chr12:22738195-22748860	-	protein_coding	-1.8149	0.284223	0.000915702	0.00914005	1.01538	2.83028	7.1927	5.66431	5.58897	1.55814	0.679821	0.922172
ENSRNOG00000001424	Cux1	chr12:23151180-23445074	+	protein_coding	-1.36249	0.388911	0.00361395	0.0185848	2.94766	4.31015	15.2887	22.0624	19.7808	5.57408	6.24473	8.6416
ENSRNOG00000001435	Ssc4d	chr12:23752844-23762877	+	protein_coding	-0.726168	0.604507	0.00139403	0.0112519	0.460231	1.1864	1.25968	1.53182	1.06038	0.43461	0.368064	0.326751
ENSRNOG00000001448	Hip1	chr12:24180937-24315373	+	protein_coding	-2.14179	0.226598	0.000990625	0.00949056	2.94043	5.08222	33.7222	31.0608	33.924	5.27723	5.69874	9.75751
ENSRNOG00000001455	Kif13a	chr17:18151982-18335019	+	protein_coding	-1.07683	0.474069	0.004263	0.0204813	3.46485	4.54168	21.8219	21.0458	24.1112	8.19941	9.52624	12.9008
ENSRNOG00000001465	Ids	chr8:69449801-69466618	-	protein_coding	-1.27037	0.414555	0.00766853	0.0289669	4.0261	5.29647	35.6122	37.8283	41.6984	10.8347	16.1607	20.2931
ENSRNOG00000001478	Gtf2ird1	chr12:25264192-25371001	+	protein_coding	-0.8721	0.546351	0.000354242	0.00598345	1.31393	2.18603	3.61342	3.34387	3.70197	1.6925	1.50286	1.28036
ENSRNOG00000001479	Gtf2i	chr12:25411207-25488156	+	protein_coding	-1.49865	0.353883	0.00799239	0.0296816	3.9173	5.41595	42.1751	39.8154	43.1605	10.7455	11.7991	21.9415
ENSRNOG00000001493	Kptn	chr1:78015722-78023676	+	protein_coding	-0.65468	0.635216	0.0210901	0.0550552	2.39129	3.04597	8.03551	6.86015	6.93227	3.56579	3.80246	5.58515
ENSRNOG00000001515	Zak	chr3:58965552-59067369	+	protein_coding	-1.68641	0.310699	0.00185751	0.01301	2.62485	4.31125	14.2041	21.2299	22.15	4.48323	4.85214	6.31341
ENSRNOG00000001517	Pdk1	chr3:58530870-58558027	+	protein_coding	-0.675298	0.626203	0.00066346	0.00782399	2.49511	3.1704	8.55436	8.03679	7.45171	4.73532	4.28345	4.91331
ENSRNOG00000001518	Itga6	chr3:58443101-58515124	+	protein_coding	-1.8707	0.273442	0.0286577	0.0676024	2.23652	4.10722	10.3899	15.3937	26.4151	1.82647	3.76702	6.76765
ENSRNOG00000001531	Chac2	chr14:115383910-115391652	-	protein_coding	-0.734399	0.601069	0.00304021	0.0170196	2.54055	3.27495	7.47997	9.43343	9.25073	4.40487	4.79763	5.2851
ENSRNOG00000001544	Cyyr1	chr11:24967937-25078740	-	protein_coding	-1.99244	0.251313	0.0198754	0.0527942	1.05176	3.0442	8.37896	5.50451	8.20066	2.78057	1.08181	0.131975
ENSRNOG00000001547	Agps	chr3:62648447-62749153	+	protein_coding	-0.626477	0.647756	0.0145891	0.0428191	3.68031	4.30678	16.3105	19.3313	21.0262	10.1229	13.5537	12.0154
ENSRNOG00000001597	Atf2	chr3:60721135-60795951	-	protein_coding	-0.609394	0.655472	0.0310799	0.0717453	3.51276	4.12215	15.4196	14.7091	19.4719	8.35073	11.3548	11.8722
ENSRNOG00000001602	Ltn1	chr11:27022986-27080701	-	protein_coding	-0.725416	0.604823	0.0396183	0.0858161	2.729	3.45441	9.86623	9.55736	10.4818	5.4367	4.05909	7.94939
ENSRNOG00000001608	Nxpe3	chr11:47188495-47238372	+	protein_coding	-0.792409	0.577379	0.000706187	0.00805497	0.690583	1.48299	1.83529	1.66535	1.89017	0.453913	0.72572	0.675522
ENSRNOG00000001609	Cep97	chr11:47146308-47174713	+	protein_coding	-0.894061	0.538097	0.00312766	0.0173008	0.98233	1.87639	2.34739	2.5931	3.11505	0.697508	1.10278	1.16036
ENSRNOG00000001616	Senp7	chr11:46880928-47027667	-	protein_coding	-1.24318	0.42244	0.0457777	0.0955378	2.46713	3.71032	11.3822	10.9283	14.1836	2.35451	4.47477	8.20553
ENSRNOG00000001621	C2cd2	chr11:38357424-38420119	-	protein_coding	-0.718902	0.60756	0.0494577	0.100765	2.17035	2.88925	6.76744	6.34055	6.13262	2.35276	3.39992	5.18266
ENSRNOG00000001627	Abi3bp	chr11:46208075-46369577	-	protein_coding	-1.85963	0.275546	0.0014376	0.0114559	2.58476	4.44439	17.3552	21.7157	23.7515	3.80568	4.80388	6.74098
ENSRNOG00000001629	Wrb	chr11:36497509-36511535	+	protein_coding	-1.60272	0.329257	0.0492233	0.100425	0.615634	2.21835	8.71885	1.52508	3.10657	0.551428	0.384499	0.674746
ENSRNOG00000001652	Erg	chr11:35646116-35749594	-	protein_coding	-1.2997	0.406212	0.00562955	0.0240937	3.17641	4.47611	19.6211	20.7922	23.5309	5.59004	9.46056	9.71865
ENSRNOG00000001682	Ttc3	chr11:34598492-34738791	+	protein_coding	-1.24142	0.422957	0.000999067	0.00955883	3.27112	4.51254	22.1418	20.3045	23.1193	7.49178	8.15979	10.5674
ENSRNOG00000001684	Ripply3	chr11:34557679-34565776	+	protein_coding	-2.97094	0.127544	0.0177192	0.0487614	1.11931	4.09025	6.2619	22.2378	28.2829	0.390353	0.883781	2.91456
ENSRNOG00000001686	Hlcs	chr11:34352287-34526931	-	protein_coding	-1.15321	0.449625	0.00570046	0.0242403	0.975591	2.1288	3.43673	3.0641	3.63947	0.929586	0.550758	1.5412
ENSRNOG00000001687	Crybg3	chr11:42945084-43005097	+	protein_coding	-1.62203	0.324878	0.000207367	0.00472686	2.05917	3.6812	10.9989	11.1934	13.4274	2.97945	2.84533	3.72997
ENSRNOG00000001709	Ap2m1	chr11:84041184-84047546	-	protein_coding	-0.696215	0.617189	0.0136121	0.0410101	5.83362	6.52983	87.4552	94.8122	92.0851	45.7591	56.5089	67.9729
ENSRNOG00000001711	Hrasls	chr11:75125952-75144903	-	protein_coding	-0.649857	0.637343	0.0387655	0.0844661	0.291619	0.941476	1.12148	1.24943	0.484311	0.061999	0.284234	0.34459
ENSRNOG00000001714	Atp13a4	chr11:74834050-74968336	+	protein_coding	-0.82208	0.565626	0.00347729	0.0182564	1.9904	2.81248	6.14497	6.37148	5.58209	2.96718	2.42778	3.61332
ENSRNOG00000001715	Ece2	chr11:83948230-83964055	-	protein_coding	-0.710705	0.611022	4.19702e-05	0.00308224	0.311764	1.02247	1.07994	0.96456	1.05147	0.199253	0.246484	0.279245
ENSRNOG00000001726	Tmem44	chr11:73738433-73774190	+	protein_coding	-2.05512	0.240628	0.000952273	0.00929457	0.437223	2.49234	3.1832	6.29657	4.83692	0.333589	0.312699	0.417963
ENSRNOG00000001730	Acap2	chr11:73078982-73191132	+	protein_coding	-0.935953	0.522697	0.0142409	0.04216	3.60606	4.54202	19.5175	23.3147	24.343	8.70603	10.7528	14.8277
ENSRNOG00000001756	LOC100911374	chr11:72786730-72814850	-	protein_coding	-0.688462	0.620515	0.0309551	0.0715707	2.41016	3.09862	5.89141	7.68006	9.50762	3.52545	4.70724	4.81441
ENSRNOG00000001762	Pcyt1a	chr11:71548222-71591502	-	protein_coding	-0.731816	0.602145	0.0413452	0.0886718	2.36707	3.09889	7.54115	7.65096	7.51128	3.8325	2.98558	6.12879
ENSRNOG00000001764	Vps8	chr11:83105064-83300409	-	protein_coding	-0.733303	0.601525	0.00974713	0.0333928	2.7463	3.4796	10.2524	10.7595	9.48964	4.72309	5.4622	7.16855
ENSRNOG00000001765	Slc51a	chr11:71533078-71547476	+	protein_coding	-1.03813	0.486958	0.0152299	0.0440334	0.0829453	1.12108	1.19374	1.89312	0.621367	0	0	0.188248
ENSRNOG00000001769	Tnk2	chr11:71348717-71387992	-	protein_coding	-0.949209	0.517916	9.85067e-05	0.00376006	1.79979	2.749	5.60982	5.90656	5.65486	2.21879	2.66601	2.57671
ENSRNOG00000001770	Ehhadh	chr11:82945104-82978364	+	protein_coding	-0.895636	0.53751	0.0172364	0.04792	1.03241	1.92804	2.23574	2.83593	3.43971	1.08468	0.62057	1.5331
ENSRNOG00000001774	Lrch3	chr11:71012061-71108184	-	protein_coding	-0.770223	0.586327	0.000651438	0.00779376	3.50575	4.27598	18.0573	17.5679	19.5478	9.73096	9.9673	11.453
ENSRNOG00000001781	Lmln	chr11:70897052-70961358	-	protein_coding	-0.689022	0.620274	0.0193461	0.0519169	1.11298	1.802	2.572	2.3939	2.49748	0.977998	0.846699	1.7701
ENSRNOG00000001785	Etv5	chr11:82194657-82252139	+	protein_coding	-2.24429	0.211058	7.39889e-05	0.00348442	1.69535	3.93964	14.5997	14.525	13.9177	2.28292	1.7457	2.76824
ENSRNOG00000001789	Zfp148	chr11:70514750-70618347	-	protein_coding	-0.709397	0.611576	0.0206757	0.0542953	2.43713	3.14653	7.49785	7.9128	8.16797	4.34858	3.34648	5.83237
ENSRNOG00000001792	Slc12a8	chr11:70344797-70499200	-	protein_coding	-0.838629	0.559175	0.00438742	0.0208177	0.528455	1.36708	1.77766	1.21204	1.79337	0.392145	0.633946	0.31923
ENSRNOG00000001793	Heg1	chr11:70236888-70322690	-	protein_coding	-2.885	0.135372	0.00271677	0.0159644	2.2892	5.1742	30.4565	33.4625	42.422	2.79688	2.54921	7.66557
ENSRNOG00000001804	AABR07062513.1	chr4:180538389-180722358	-	protein_coding	-0.633035	0.644818	0.0379515	0.0830718	2.56607	3.1991	6.054	9.16298	9.80494	4.97297	4.36861	5.47647
ENSRNOG00000001817	Tm7sf3	chr4:180913706-180951564	-	protein_coding	-1.43462	0.369945	0.000314432	0.00562523	1.90471	3.33933	9.00188	9.54042	8.83494	3.24001	2.871	2.19839
ENSRNOG00000001827	Masp1	chr11:80736576-80803382	+	protein_coding	-1.09041	0.469629	0.00296477	0.0167764	0.299606	1.39001	1.15548	1.7906	1.9927	0.117547	0.210083	0.378764
ENSRNOG00000001844	Klhl42	chr4:181481147-181502916	+	protein_coding	-0.755367	0.592396	0.0419974	0.089609	0.228725	0.984091	1.76052	0.719558	0.630478	0.073933	0.312001	0.141951
ENSRNOG00000001849	Mapk1	chr11:88211599-88273254	-	protein_coding	-0.643419	0.640194	0.0124728	0.038979	4.60672	5.25013	33.6682	37.5978	40.1956	19.9992	23.0191	27.6761
ENSRNOG00000001854	Tmtc1	chr4:182625386-182844291	-	protein_coding	-2.38456	0.191504	0.000109419	0.00384226	0.839933	3.22449	7.86926	7.5633	9.75168	0.656791	0.639393	1.11147
ENSRNOG00000001860	Ccdc116	chr11:88095170-88098252	+	protein_coding	-0.731115	0.602438	0.0168185	0.0471092	0.287	1.01811	1.17748	0.596024	1.39031	0.303723	0.224672	0.137579
ENSRNOG00000001861	Ydjc	chr11:88090921-88093516	-	protein_coding	-0.918355	0.529112	0.0446017	0.0937887	1.24083	2.15919	4.31519	2.32054	4.04911	1.78942	1.77023	0.708271
ENSRNOG00000001870	Lztr1	chr11:87381899-87397498	+	protein_coding	-0.914147	0.530657	0.00290745	0.0166011	3.38478	4.29893	18.3948	18.7621	18.8977	8.55419	8.40146	11.6874
ENSRNOG00000001872	Lrrc74b	chr11:87418205-87434482	-	protein_coding	-0.903045	0.534757	0.029338	0.0687389	0.400119	1.30316	1.22642	1.44895	1.75605	0	0.249263	0.839458
ENSRNOG00000001873	P2rx6	chr11:87435185-87445219	+	protein_coding	-1.06438	0.478177	0.0122373	0.0385476	0.795905	1.86029	2.87313	2.43933	2.59312	0.579752	0.380709	1.39929
ENSRNOG00000001874	Slc7a4	chr11:87446382-87449940	-	protein_coding	-1.24706	0.421307	0.000302852	0.00552481	0.47124	1.71829	2.66847	2.00825	2.22831	0.278993	0.391647	0.496838
ENSRNOG00000001876	Ccdc74a	chr11:87549059-87553336	+	protein_coding	-1.09234	0.469	0.00732459	0.0280837	0.448567	1.54091	2.00149	1.31279	2.54899	0.31814	0.60211	0.203491
ENSRNOG00000001880	Dgcr6	chr11:87076381-87081950	-	protein_coding	-0.718075	0.607908	0.00847505	0.0306904	2.02832	2.74639	6.26025	5.4584	5.44408	2.8421	2.59381	3.91618
ENSRNOG00000001888	Arvcf	chr11:86736142-86793791	-	protein_coding	-2.32444	0.199652	6.51401e-06	0.00244591	1.16445	3.48889	10.0642	9.70734	10.9447	1.31909	1.06658	1.3498
ENSRNOG00000001908	Klhl6	chr11:84745904-84785893	+	protein_coding	-0.887257	0.540641	0.0375016	0.0822603	1.30844	2.1957	5.2932	2.35306	3.55619	1.09265	1.63955	1.75052
ENSRNOG00000001912	Tecrl	chr14:26662965-26737657	+	protein_coding	-0.973917	0.509122	0.00510012	0.0227212	0.0852922	1.05921	0.969622	1.55776	0.796055	0.194061	0	0
ENSRNOG00000001915	Chodl	chr11:17538063-17560296	+	protein_coding	-2.60261	0.16464	0.00129895	0.0109629	0.979311	3.58192	15.4223	8.91849	9.5419	0.72647	0.642182	1.70287
ENSRNOG00000001926	Cldn1	chr11:77815181-77830416	+	protein_coding	-2.06251	0.2394	0.00126242	0.0108037	0.463519	2.52603	3.1582	6.38756	5.22047	0.493329	0.380102	0.272134
ENSRNOG00000001930	Ccdc50	chr11:76747865-76804510	-	protein_coding	-1.17682	0.442326	0.00137432	0.0111874	3.65719	4.83401	23.6712	26.3199	33.4253	11.6935	10.9474	12.241
ENSRNOG00000001931	Fgf12	chr11:75905443-76168989	+	protein_coding	-0.847626	0.555698	0.0015963	0.0120709	0.448907	1.29653	1.16884	1.52035	1.71142	0.335904	0.476086	0.289782
ENSRNOG00000001956	Dzip3	chr11:54404446-54472447	+	protein_coding	-1.09014	0.469715	0.00709298	0.0275371	1.21827	2.30841	3.8768	3.80825	4.18297	1.05242	0.967601	2.1189
ENSRNOG00000001989	Alcam	chr11:50781127-50985083	+	protein_coding	-0.859146	0.551279	0.00155943	0.0119533	6.18724	7.04639	116.85	149.019	129.631	67.4658	72.4485	75.9451
ENSRNOG00000001992	Atp6v1a	chr11:61531578-61584634	+	protein_coding	-0.595361	0.661879	0.00393117	0.0195657	5.05911	5.65447	46.8406	53.5295	47.9853	34.0265	34.4865	28.8105
ENSRNOG00000002014	Stap1	chr14:23576085-23604834	-	protein_coding	-0.76871	0.586942	0.0182639	0.049868	0.723896	1.49261	1.75097	1.56551	2.15716	0.31874	0.688003	1.024
ENSRNOG00000002039	Evi5	chr14:2892753-3038237	+	protein_coding	-0.617607	0.651751	0.00106106	0.00990433	3.84343	4.46104	21.2639	20.7417	21.0713	11.989	14.1393	14.0413
ENSRNOG00000002040	Bmp2k	chr14:14129725-14192048	-	protein_coding	-1.24335	0.42239	0.00827132	0.0302689	2.45439	3.69774	11.7417	11.6013	12.6065	2.94798	4.79155	6.20051
ENSRNOG00000002045	Anxa3	chr14:14364008-14426437	-	protein_coding	-1.97766	0.253902	0.0124149	0.0388698	3.75535	5.733	41.8291	54.5059	62.2904	6.49396	17.9579	16.3345
ENSRNOG00000002046	Cd200r1l	chr11:60804311-60819249	-	protein_coding	-0.830372	0.562384	0.0319292	0.0731369	0.721758	1.55213	2.12379	2.41379	1.3648	0.406999	1.17841	0.463457
ENSRNOG00000002052	Ccdc80	chr11:60645661-60679249	-	protein_coding	-1.19212	0.43766	0.0440804	0.0929344	4.0294	5.22152	32.4175	47.2842	31.1902	21.6767	18.3747	8.91058
ENSRNOG00000002053	Fras1	chr14:14439082-14689554	-	protein_coding	-2.15	0.225313	3.09736e-05	0.00278055	0.567395	2.7174	5.47966	6.39117	4.94001	0.406612	0.57242	0.471181
ENSRNOG00000002061	Ptpn13	chr14:7688551-7863664	-	protein_coding	-0.739822	0.598813	0.00537345	0.0234955	4.24811	4.98794	29.5252	29.8986	32.8811	15.4761	17.6946	21.2772
ENSRNOG00000002101	Paics	chr14:33563886-33580566	-	protein_coding	-0.699377	0.615838	0.0116612	0.0374286	4.04606	4.74544	22.3114	27.649	27.8988	12.9489	16.7807	17.1748
ENSRNOG00000002112	Zfp644	chr14:4125380-4200328	+	protein_coding	-0.599802	0.659844	0.00686676	0.0270779	2.98243	3.58223	10.6526	11.1437	11.1424	5.86779	6.93416	8.05907
ENSRNOG00000002120	Spata18	chr14:37081427-37108341	-	protein_coding	-1.73509	0.300389	0.0182663	0.049868	2.18287	3.91797	14.2419	12.764	15.4624	1.45448	5.03411	5.32059
ENSRNOG00000002122	Lrrc8c	chr14:5283647-5378726	-	protein_coding	-1.97073	0.255125	0.0218745	0.0563744	1.53154	3.50227	10.471	9.71189	10.8411	0.784681	5.03167	1.2445
ENSRNOG00000002125	Ccni	chr14:16341536-16364326	+	protein_coding	-0.647324	0.638464	3.79132e-05	0.00292987	6.45814	7.10546	137.329	137.811	134.998	84.9189	85.1532	90.8158
ENSRNOG00000002129	Lrrc8b	chr14:5418741-5428757	-	protein_coding	-0.97282	0.509509	0.00243065	0.0150576	3.16001	4.13283	16.8207	14.4544	18.6039	7.169	7.50286	9.28116
ENSRNOG00000002152	Dcun1d4	chr14:37210721-37294472	-	protein_coding	-0.898491	0.536448	0.0140001	0.0417163	2.42337	3.32186	9.44565	7.95439	9.68966	3.1378	4.6169	5.64127
ENSRNOG00000002171	Phldb2	chr11:57404196-57481567	+	protein_coding	-2.95141	0.129282	0.00118351	0.0104743	1.48973	4.44114	19.4999	21.2288	21.4948	1.10199	1.29753	3.58638
ENSRNOG00000002176	Nectin3	chr11:57897879-57993548	-	protein_coding	-0.888224	0.540279	0.015701	0.0449753	4.58963	5.47785	42.3651	39.6195	49.248	17.2763	25.7521	27.5497
ENSRNOG00000002181	Helq	chr14:10446993-10491190	+	protein_coding	-0.779419	0.582601	0.00092827	0.00918947	0.975635	1.75505	2.23478	2.43289	2.46311	1.10371	0.753243	1.06185
ENSRNOG00000002196	Ociad2	chr14:37435654-37444775	+	protein_coding	-1.01659	0.494284	0.000525893	0.00701766	2.56147	3.57806	12.2169	10.0113	10.7042	4.52459	4.80661	5.41231
ENSRNOG00000002214	Klhl8	chr14:7169519-7215025	+	protein_coding	-0.703266	0.61418	0.000574533	0.00731969	1.98867	2.69194	5.59664	4.93372	5.89311	2.80905	3.06418	3.03797
ENSRNOG00000002215	Mylk	chr11:69013050-69223158	-	protein_coding	-1.8815	0.271402	0.00156461	0.0119562	4.51705	6.39855	84.9259	70.318	96.9816	19.2426	18.463	29.4671
ENSRNOG00000002227	Kit	chr14:35072108-35149610	-	protein_coding	-2.62479	0.162128	0.00289156	0.0165251	2.64772	5.27251	24.3709	58.1633	37.4737	3.81419	6.59912	5.72734
ENSRNOG00000002229	Adcy5	chr11:68695839-68842320	-	protein_coding	-1.3319	0.397245	0.00211118	0.0139116	1.26463	2.59653	3.99938	5.93708	5.37983	1.23223	1.17872	1.85192
ENSRNOG00000002273	Naaa	chr14:17283124-17302366	+	protein_coding	-0.815218	0.568322	0.0153847	0.0443223	5.91918	6.7344	107.12	119.114	91.9547	58.0716	74.0227	49.0015
ENSRNOG00000002280	Sh3bgrl	chrX:80213332-80309936	+	protein_coding	-0.853142	0.553578	0.00452899	0.0212537	6.73731	7.59045	170.12	208.288	198.902	89.5347	112.688	116.996
ENSRNOG00000002285	LOC100909732	chrX:157854272-157879928	+	protein_coding	-0.76746	0.587451	0.00342199	0.0181761	1.81367	2.58113	4.76278	5.97174	4.33356	2.31347	2.54983	2.6933
ENSRNOG00000002294	Snx29	chr10:3840622-4249739	-	protein_coding	-1.50903	0.351348	0.000326024	0.00570561	1.67543	3.18445	7.70269	9.04101	7.59836	1.98593	1.93558	2.7178
ENSRNOG00000002302	Corin	chr14:38247791-38473648	+	protein_coding	-1.28504	0.410359	0.0101782	0.0343359	0.28718	1.57222	1.10312	2.98925	2.13402	0.233939	0.332905	0.10473
ENSRNOG00000002305	Slc15a2	chr11:66932614-66961713	+	protein_coding	-1.58122	0.334199	0.000434882	0.00652923	1.74721	3.32843	10.1443	9.80084	7.42087	2.02826	2.51569	2.5537
ENSRNOG00000002318	Limch1	chr14:42762587-43072843	-	protein_coding	-2.71367	0.152442	5.88202e-05	0.00331589	4.45271	7.16638	129.45	136.873	163.803	20.2258	18.4541	24.4287
ENSRNOG00000002322	RGD1310587	chr13:102780877-102790639	-	protein_coding	-1.69337	0.309203	0.00649912	0.0262402	4.02912	5.7225	53.2469	53.7773	48.5398	9.57992	17.5041	21.2285
ENSRNOG00000002331	Aldh3a1	chr10:47490153-47499876	+	protein_coding	-1.68832	0.310287	5.51342e-05	0.00327272	0.465171	2.15349	3.51476	3.63321	3.21	0.425691	0.496309	0.233231
ENSRNOG00000002338	Dgke	chr10:76386471-76407989	-	protein_coding	-0.967045	0.511553	0.00916018	0.0322636	1.02059	1.98763	3.1402	2.9491	2.81499	1.68041	0.722951	0.808048
ENSRNOG00000002342	Aldh3a2	chr10:47525493-47546345	-	protein_coding	-0.905456	0.533864	0.0298854	0.0697741	3.19758	4.10303	13.6111	17.9191	17.358	5.87107	11.4465	8.02875
ENSRNOG00000002347	Rgl1	chr13:69909096-70174565	-	protein_coding	-0.852681	0.553755	6.94396e-05	0.00339194	3.9557	4.80838	27.6746	25.5861	27.8567	15.0567	14.6457	13.8696
ENSRNOG00000002358	Scpep1	chr10:76230373-76263866	-	protein_coding	-0.922115	0.527735	0.0109691	0.0358801	4.8902	5.81231	50.113	64.7443	51.8023	34.609	22.7413	29.8478
ENSRNOG00000002365	Itm2a	chrX:78490866-78496847	-	protein_coding	-1.36561	0.388071	0.0270734	0.0650903	3.54012	4.90573	29.0778	26.8247	31.1838	16.3143	5.86976	12.2343
ENSRNOG00000002368	Iars2	chr13:103231387-103264906	-	protein_coding	-0.75585	0.592197	0.0088222	0.0314773	3.38862	4.14447	15.4375	16.054	18.7316	7.66865	10.5043	10.519
ENSRNOG00000002372	Sgcd	chr10:32062946-32471454	-	protein_coding	-0.835918	0.560227	0.00733542	0.0281178	0.807944	1.64386	1.81187	2.81853	1.84226	0.57403	0.784341	0.910537
ENSRNOG00000002382	Mfap4	chr10:47765432-47768483	+	protein_coding	-1.22229	0.428602	0.000537633	0.00711447	6.31462	7.53691	173.775	202.488	179.089	87.6942	68.8882	80.3524
ENSRNOG00000002394	Tpr	chr13:67611708-67672827	+	protein_coding	-0.61711	0.651976	0.0245275	0.0609645	4.37703	4.99414	28.1046	30.3691	34.4561	16.2276	19.8538	23.9712
ENSRNOG00000002407	Pdxdc1	chr10:3232794-3321412	-	protein_coding	-0.743532	0.597276	0.0129408	0.0398388	2.73701	3.48054	9.18557	11.2003	10.1914	4.4032	6.0507	6.77823
ENSRNOG00000002423	Fam114a2	chr10:42894567-42928461	-	protein_coding	-1.33067	0.397585	0.00845705	0.0306787	2.62962	3.96028	12.2373	14.5225	17.3539	3.79815	4.84337	7.45361
ENSRNOG00000002434	Tmem100	chr10:77537340-77543192	+	protein_coding	-2.30758	0.201999	0.00190246	0.01315	5.29935	7.60692	215.898	152.414	221.647	27.0285	40.2404	51.8278
ENSRNOG00000002443	Mfap3	chr10:42933077-42945564	+	protein_coding	-0.756555	0.591908	0.0134099	0.040668	1.70789	2.46444	4.70007	4.83537	4.05433	2.61082	1.59308	2.72351
ENSRNOG00000002449	Maged2	chr5:33174542-33182715	-	protein_coding	-1.60669	0.328351	0.000922253	0.00916657	2.80842	4.41511	17.7227	21.2896	22.2686	4.9252	5.77158	7.56763
ENSRNOG00000002454	Rnf2	chr13:68830620-68858809	-	protein_coding	-0.61194	0.654316	0.0223424	0.0571303	2.63141	3.24335	7.74352	8.22629	9.52749	4.59885	4.57708	6.61896
ENSRNOG00000002456	Hlf	chr10:77840568-77918191	-	protein_coding	-2.71159	0.152662	0.000153004	0.00422273	1.381	4.09259	15.8469	16.5565	15.7887	1.43086	1.15456	2.37328
ENSRNOG00000002459	Fbxo40	chr11:66713888-66731198	+	protein_coding	-1.0807	0.472798	0.00340251	0.0181256	0.6519	1.7326	1.84667	2.49685	2.68708	0.359052	0.858178	0.536036
ENSRNOG00000002461	Nid1	chr17:90553394-90627101	-	protein_coding	-1.51965	0.34877	0.0267941	0.0646319	3.53359	5.05324	24.8007	35.654	37.7062	5.74115	12.3403	16.2683
ENSRNOG00000002473	RGD1307830	chr13:67583621-67609469	-	protein_coding	-0.733479	0.601452	0.00686506	0.0270779	2.63732	3.3708	8.60011	9.25687	10.2419	4.30462	5.31674	6.18766
ENSRNOG00000002480	Gpr137b	chr17:90670872-90746804	+	protein_coding	-1.26546	0.415966	0.00552244	0.023853	1.33945	2.60491	5.16973	4.57831	5.54188	1.00817	1.38042	2.38992
ENSRNOG00000002488	Galnt10	chr10:43067299-43210427	+	protein_coding	-1.17108	0.444088	0.000691299	0.00797269	2.20906	3.38014	8.49691	8.9993	10.8855	3.19613	4.01971	3.69298
ENSRNOG00000002516	Mtm1	chr6:18821815-18839409	+	protein_coding	-0.782167	0.581493	0.0223636	0.0571488	2.52841	3.31057	8.50868	8.88787	9.38776	3.53451	4.61369	6.54396
ENSRNOG00000002538	Epb4.1l5	chr13:35580098-35668968	-	protein_coding	-1.31551	0.401783	0.00570559	0.0242479	2.70763	4.02314	14.1516	14.1232	17.7567	4.51294	4.7023	7.8675
ENSRNOG00000002541	Pds5a	chr14:44185446-44280079	+	protein_coding	-0.766995	0.58764	0.0166232	0.0467696	3.54823	4.31523	17.2612	19.0246	20.5747	8.31843	10.9734	13.3487
ENSRNOG00000002544	Kifap3	chr13:82072497-82217252	+	protein_coding	-0.871198	0.546693	0.014308	0.0422358	3.28258	4.15378	15.7536	17.0771	17.6208	6.35333	9.728	10.6805
ENSRNOG00000002598	Hnf1b	chr10:71159869-71218902	+	protein_coding	-0.633155	0.644765	6.18347e-05	0.00335624	1.54026	2.17342	3.34775	3.5253	3.66529	1.82699	1.96314	1.9371
ENSRNOG00000002624	Edaradd	chr17:90802393-90843485	+	protein_coding	-0.982718	0.506026	0.00047369	0.00672576	0.595434	1.57815	2.18776	1.63138	2.17354	0.500066	0.557661	0.476208
ENSRNOG00000002625	Ptpn4	chr13:35678240-35858390	-	protein_coding	-1.09971	0.466611	0.00127634	0.0108612	2.3368	3.43651	9.50813	8.60789	11.5698	3.65269	3.98729	4.55618
ENSRNOG00000002627	Kctd3	chr13:107433588-107471843	-	protein_coding	-0.714854	0.609267	0.00437284	0.0207763	2.55431	3.26916	7.90292	10.1524	8.02496	5.40926	4.69752	4.54978
ENSRNOG00000002653	Kcnk2	chr13:107690087-107886476	-	protein_coding	-2.03591	0.243855	0.000130989	0.00401048	0.659158	2.69507	5.66071	4.66938	6.19169	0.389947	0.747434	0.621364
ENSRNOG00000002682	Zfp692	chr10:43744731-43752242	+	protein_coding	-0.644203	0.639846	0.0217976	0.0562359	2.51	3.1542	8.7618	7.64245	7.36298	4.25224	3.94184	6.12068
ENSRNOG00000002708	Phf8	chrX:21063545-21168701	+	protein_coding	-0.624538	0.648627	0.0380611	0.0832366	2.32097	2.94551	7.11303	6.43238	6.58144	3.43822	3.26035	5.59772
ENSRNOG00000002710	Cnst	chr13:97838361-97913082	+	protein_coding	-1.36886	0.387196	0.0102047	0.0343908	2.15818	3.52704	10.2304	10.7911	10.5687	2.22084	3.21631	5.54833
ENSRNOG00000002711	Nuf2	chr13:87818391-87847263	-	protein_coding	-0.750849	0.594254	0.0328185	0.0745982	1.02463	1.77548	1.91089	3.66162	1.95703	0.881084	1.00137	1.23664
ENSRNOG00000002721	Ndufb4	chr11:65960277-65966898	+	protein_coding	-0.629578	0.646366	0.0132557	0.0404229	5.10319	5.73276	51.4262	55.7454	49.5503	27.8036	34.0247	39.2545
ENSRNOG00000002722	Sec14l1	chr10:106065712-106112857	+	protein_coding	-2.33538	0.198144	0.00425018	0.0204264	4.08643	6.42181	80.5743	79.7359	94.686	10.423	14.047	27.5222
ENSRNOG00000002730	Rgs5	chr13:87966758-88003035	+	protein_coding	-2.0255	0.24562	0.0241919	0.0603573	2.36709	4.39259	16.2342	20.6653	23.8171	1.66884	4.11506	9.05825
ENSRNOG00000002736	Rabgap1l	chr13:78011047-78609045	-	protein_coding	-0.794206	0.57666	0.0103359	0.0346507	1.72847	2.52267	4.32651	4.91114	5.02681	1.82655	2.11115	3.13794
ENSRNOG00000002746	Fstl1	chr11:65782567-65845418	-	protein_coding	-1.95541	0.257848	0.00176544	0.0126746	3.02606	4.98147	27.1311	33.8241	31.1849	5.90041	5.81964	10.4861
ENSRNOG00000002751	Zdhhc15	chrX:75439778-75566481	-	protein_coding	-0.902276	0.535042	0.0197743	0.0526024	0.590946	1.49322	1.26471	1.988	2.29702	0.401233	0.912883	0.274908
ENSRNOG00000002755	Pafah1b1	chr10:61456145-61577412	-	protein_coding	-0.626516	0.647739	0.0466542	0.0967754	3.96972	4.59624	23.9969	22.5358	23.0548	10.935	14.9853	19.1591
ENSRNOG00000002757	Tada2a	chr10:71393692-71441389	-	protein_coding	-0.884086	0.541831	0.0226725	0.0576645	2.11075	2.99484	8.89826	5.1787	7.28236	3.13666	4.22829	2.72556
ENSRNOG00000002759	Lias	chr14:44507218-44524252	-	protein_coding	-0.795564	0.576118	0.00575156	0.024365	2.15161	2.94717	6.01987	6.40739	7.82194	3.26087	3.00015	4.14657
ENSRNOG00000002763	Ulk2	chr10:48050803-48129377	-	protein_coding	-0.606039	0.656998	0.00177714	0.0127169	4.23827	4.84431	27.6611	25.669	30.0133	16.7313	19.1108	17.8525
ENSRNOG00000002767	Dlg3	chrX:70596576-70648532	+	protein_coding	-0.8857	0.541225	0.00468938	0.0216296	2.41724	3.30294	8.92994	9.23206	8.4611	3.50576	4.22297	5.47588
ENSRNOG00000002775	Npl	chr13:70938082-70980913	-	protein_coding	-0.9939	0.502119	0.0255599	0.062642	1.39095	2.38485	4.09774	4.49132	4.08957	0.868184	1.61288	2.695
ENSRNOG00000002781	Kdsr	chr13:26780633-26812215	-	protein_coding	-0.849265	0.555067	0.0242827	0.0605424	3.2964	4.14567	15.9008	17.0189	17.2086	6.23572	9.27215	11.7587
ENSRNOG00000002790	Abcb7	chrX:75150608-75291938	-	protein_coding	-0.892718	0.538599	0.00441776	0.020915	2.18073	3.07345	7.01946	8.34783	6.95693	2.88024	3.48609	4.3539
ENSRNOG00000002807	Sept9	chr10:106264434-106348490	+	protein_coding	-1.71406	0.304801	0.00100202	0.00958075	3.3336	5.04767	30.0854	32.6399	33.6007	6.85191	9.4907	11.4384
ENSRNOG00000002813	Dars2	chr13:78857638-78885464	-	protein_coding	-1.10247	0.465718	0.00272708	0.0160113	1.6799	2.78237	5.39257	6.63652	5.67053	1.84126	1.94613	2.92951
ENSRNOG00000002814	Higd1b	chr10:90929867-90931635	+	protein_coding	-2.27507	0.206603	0.00534804	0.023453	2.92475	5.19982	20.605	41.9043	52.5609	5.54172	7.86475	6.55011
ENSRNOG00000002821	Phlpp1	chr13:26172243-26394505	+	protein_coding	-1.42496	0.372429	0.0071304	0.0276158	2.26978	3.69474	8.23551	12.6531	16.2185	3.28849	3.78516	4.46531
ENSRNOG00000002828	Tob1	chr10:81913689-81915716	+	protein_coding	-3.9944	0.0627429	0.0212676	0.055317	0	3.9944	38.494	2.575	27.6747	0	0	0
ENSRNOG00000002832	Slc16a2	chrX:74577131-74706214	-	protein_coding	-1.22416	0.428046	0.0020499	0.0136932	0.841807	2.06597	2.68756	3.18465	3.75726	0.717035	1.14437	0.563679
ENSRNOG00000002833	Gsk3b	chr11:65066235-65209268	-	protein_coding	-1.17388	0.443229	0.000600161	0.00745469	3.07639	4.25026	16.4139	19.0378	18.7525	6.45157	7.4915	8.48465
ENSRNOG00000002841	Cdc42bpa	chr13:98231326-98447762	+	protein_coding	-1.81551	0.284104	0.00137404	0.0111874	2.43006	4.24557	17.2632	16.0634	20.9021	3.3412	4.14322	6.00993
ENSRNOG00000002848	Maoa	chrX:6554698-6620722	-	protein_coding	-1.73095	0.301254	0.000651708	0.00779376	3.00198	4.73293	22.5959	26.6429	27.8295	5.64459	6.99024	8.68342
ENSRNOG00000002855	Rfc1	chr14:44580216-44702203	+	protein_coding	-0.845285	0.556601	0.000945046	0.00924886	2.91242	3.7577	11.3428	12.3419	14.0283	6.51558	6.09331	7.00502
ENSRNOG00000002873	Fam183b	chr10:44736545-44746549	-	protein_coding	-1.09991	0.466544	0.0353534	0.0786755	4.8393	5.93922	52.7578	56.7341	73.4341	19.7027	42.9018	24.8117
ENSRNOG00000002875	Klhl20	chr13:78912361-78957212	-	protein_coding	-0.860425	0.55079	0.00561666	0.0240599	2.14097	3.0014	7.08314	6.95687	6.98377	3.25202	2.72314	4.41982
ENSRNOG00000002886	Myh10	chr10:55275411-55406732	+	protein_coding	-2.4127	0.187804	0.00176754	0.0126746	3.13993	5.55263	48.2005	46.7181	43.0429	7.79074	4.99688	11.9924
ENSRNOG00000002890	Ankrd45	chr13:78979321-78991997	+	protein_coding	-0.670972	0.628083	0.00132372	0.011032	0.241273	0.912244	0.784171	1.10522	0.774615	0.202716	0.197797	0.146422
ENSRNOG00000002896	Prdx6	chr13:79077033-79088127	-	protein_coding	-2.47436	0.179946	0.00983734	0.0336308	5.52609	8.00045	369.271	365.164	122.86	39.0363	46.3543	50.6111
ENSRNOG00000002898	Nme7	chr13:82626685-82737343	+	protein_coding	-1.07733	0.473904	0.0309695	0.0715831	2.43279	3.51012	9.77785	9.35202	12.2555	2.6165	4.74811	6.57202
ENSRNOG00000002903	Specc1	chr10:48240127-48542292	+	protein_coding	-1.75045	0.29721	0.000270198	0.00527449	2.21246	3.96291	12.2616	14.362	17.6131	3.43962	3.76137	3.70947
ENSRNOG00000002917	Sec14l5	chr10:10591251-10629735	-	protein_coding	-0.652746	0.636068	0.000939508	0.009231	0.0903167	0.743063	0.797361	0.671674	0.560507	0.108673	0	0.08833
ENSRNOG00000002930	Ppl	chr10:10644572-10690223	+	protein_coding	-2.14567	0.22599	0.000657103	0.00779784	4.05735	6.20302	70.8603	71.9655	75.2564	12.5193	14.1846	21.4797
ENSRNOG00000002932	Wdr19	chr14:44705012-44767120	-	protein_coding	-1.11785	0.460779	0.0132636	0.0404301	1.52105	2.6389	4.96182	5.62838	5.11477	1.03512	2.10808	2.73733
ENSRNOG00000002935	Ankrd40	chr10:82032656-82045935	+	protein_coding	-0.946705	0.518816	0.0333169	0.0754305	2.93226	3.87897	13.1668	12.2752	15.9335	4.27262	7.36786	9.07994
ENSRNOG00000002941	RGD1561897	chr13:88521625-88536728	-	protein_coding	-0.996679	0.501152	0.00315797	0.017373	2.6333	3.62998	11.4688	10.3555	12.402	4.10369	5.7972	5.88489
ENSRNOG00000002944	RGD1304587	chr10:45559578-45561997	+	protein_coding	-0.81204	0.569576	0.00677878	0.0268358	2.23282	3.04486	7.48312	8.12688	6.25946	3.59045	3.10298	4.51421
ENSRNOG00000002956	Stim2	chr14:59198401-59323947	-	protein_coding	-1.22895	0.426629	0.00720545	0.0277955	2.55154	3.78049	11.4091	12.8565	14.0912	3.67087	4.42108	6.95766
ENSRNOG00000002959	Shroom4	chrX:16719803-16929907	-	protein_coding	-2.46084	0.18164	0.00209103	0.0138289	1.81632	4.27716	18.4948	17.2587	19.4773	1.41742	2.29931	4.47671
ENSRNOG00000002969	Itpkb	chr13:98615287-98708149	+	protein_coding	-3.22117	0.107234	0.000228712	0.00491308	2.3993	5.62048	43.6656	39.3343	65.0918	3.52611	4.18833	5.25222
ENSRNOG00000002983	Nf1x	chr19:25821780-25914696	-	protein_coding	-0.923678	0.527163	4.16053e-05	0.00307269	3.76307	4.68675	24.288	24.7235	25.2609	11.8205	12.6795	13.2697
ENSRNOG00000002984	Bmp15	chrX:17016778-17023418	+	protein_coding	-1.51583	0.349694	0.00313815	0.0173448	0.185219	1.70105	2.98734	1.47294	2.48584	0	0.332316	0.10322
ENSRNOG00000002986	Efhc2	chrX:5825711-6026398	+	protein_coding	-1.29049	0.408811	0.00154139	0.0118974	0.424655	1.71515	1.79759	2.64484	2.47113	0.218011	0.253181	0.584297
ENSRNOG00000002991	Srr	chr10:61756138-61772293	-	protein_coding	-0.640129	0.641656	0.0295396	0.0691334	1.74323	2.38335	3.27904	4.51932	5.01384	2.25928	1.92622	2.93424
ENSRNOG00000002997	Slc9a3r2	chr10:14003320-14013870	-	protein_coding	-2.85482	0.138233	0.0103348	0.0346507	4.04547	6.90029	156.307	60.4887	175.215	10.8387	12.2765	27.6441
ENSRNOG00000003003	Tbc1d19	chr14:59403865-59516911	-	protein_coding	-1.18076	0.441119	0.000462859	0.00666471	1.42696	2.60772	4.69716	5.74346	4.89472	1.40638	1.93344	1.75378
ENSRNOG00000003013	Rpgr	chrX:14271017-14331486	-	protein_coding	-0.712015	0.610467	0.0258264	0.0630612	2.105	2.81702	5.80521	5.99577	6.35092	2.27663	4.24821	3.62985
ENSRNOG00000003031	Atp2b4	chr13:50091430-50153823	+	protein_coding	-2.15911	0.223895	0.000220481	0.0048403	1.40423	3.56333	9.13964	11.0081	12.5679	1.4931	2.11277	1.38923
ENSRNOG00000003033	Plcd3	chr10:91164812-91186054	-	protein_coding	-1.71865	0.303832	0.000446519	0.00660075	0.791235	2.50989	4.97035	5.46188	3.78958	0.629565	0.605679	0.980735
ENSRNOG00000003049	Hsd17b10	chrX:21696772-21699241	+	protein_coding	-0.67138	0.627906	0.00125576	0.0107783	4.43549	5.10687	31.7755	36.4432	32.3461	19.2653	20.535	22.2142
ENSRNOG00000003050	Tbc1d9b	chr10:35637133-35677329	+	protein_coding	-1.12256	0.459279	0.00290521	0.0165948	3.58063	4.70319	25.8006	23.761	25.6373	8.97707	10.525	13.8932
ENSRNOG00000003054	Cask	chrX:9436707-9467884	+	protein_coding	-0.793272	0.577034	0.0107716	0.0355461	1.41032	2.20359	3.26483	3.41072	4.19554	1.17204	1.78495	2.10428
ENSRNOG00000003063	Phka1	chrX:72377021-72515366	-	protein_coding	-0.871153	0.54671	0.00526848	0.0231764	0.806143	1.6773	1.94376	1.97485	2.73578	0.591294	0.649208	1.03701
ENSRNOG00000003066	Wnt9a	chr10:45659143-45681393	+	protein_coding	-0.993481	0.502264	0.00631228	0.0257936	0.555727	1.54921	1.48877	2.51226	1.86751	0.606039	0.240016	0.594735
ENSRNOG00000003073	Gpr161	chr13:83531018-83571505	+	protein_coding	-1.09346	0.468637	0.0029398	0.0167061	0.235841	1.3293	1.45627	2.05805	1.11229	0.093616	0.162991	0.28394
ENSRNOG00000003078	Dcaf6	chr13:83579036-83680207	-	protein_coding	-0.962237	0.51326	0.00664176	0.0265142	3.13868	4.10091	15.3056	15.0189	18.343	6.34122	7.56337	9.8666
ENSRNOG00000003086	Cenpv	chr10:48846728-48860902	-	protein_coding	-1.17148	0.443966	0.00994338	0.0338103	1.63182	2.8033	5.78294	5.91143	6.25518	1.25305	2.20818	3.1177
ENSRNOG00000003088	Arhgap31	chr11:64601029-64714252	+	protein_coding	-1.10618	0.464523	0.00613913	0.0253281	3.20844	4.31462	15.4467	20.0202	21.7916	6.78454	10.2432	8.02379
ENSRNOG00000003104	Trpv2	chr10:48903540-48925030	+	protein_coding	-0.790036	0.57833	0.037028	0.0814672	2.92487	3.71491	13.6327	11.8983	10.996	4.44994	7.54074	8.40877
ENSRNOG00000003108	Acbd4	chr10:91187593-91196572	+	protein_coding	-1.24244	0.422658	0.00271422	0.0159615	1.80869	3.05113	8.53473	7.32953	6.16991	2.89707	1.86299	2.85348
ENSRNOG00000003120	Prelp	chr13:50749514-50761355	-	protein_coding	-1.79878	0.287418	0.0210033	0.0549215	3.95921	5.75799	53.2604	56.7015	49.6186	7.83871	14.0753	27.2401
ENSRNOG00000003121	Rtn4rl1	chr10:62035866-62109078	+	protein_coding	-1.00802	0.497227	0.0233822	0.0589992	1.35442	2.36244	3.32081	3.14155	6.59921	1.52779	1.56561	1.57767
ENSRNOG00000003122	Hdac8	chrX:72163777-72370044	-	protein_coding	-0.703081	0.614259	0.00873227	0.0312946	1.6632	2.36628	3.86527	4.81897	3.84183	1.84018	2.00848	2.71812
ENSRNOG00000003123	Rpa1	chr10:62140419-62191512	-	protein_coding	-1.50092	0.353327	0.00294078	0.0167061	1.31257	2.81349	5.78477	5.78034	6.55182	0.816547	1.95653	1.85326
ENSRNOG00000003125	Rogdi	chr10:10761477-10766095	+	protein_coding	-1.64974	0.318698	0.00135841	0.0111266	2.9381	4.58784	28.2654	18.6382	23.1979	6.53605	5.66114	7.96769
ENSRNOG00000003129	Zfp496	chr10:45833264-45851984	-	protein_coding	-0.701988	0.614725	5.62958e-05	0.00331461	3.34647	4.04845	16.3294	14.9312	15.4092	8.94618	9.2912	9.28107
ENSRNOG00000003148	Timp2	chr10:107338465-107386072	-	protein_coding	-1.17224	0.443731	0.000154362	0.00422966	5.16419	6.33643	74.9549	85.1885	79.6054	35.1205	37.6481	32.0253
ENSRNOG00000003150	Mpc2	chr13:83681322-83700213	+	protein_coding	-0.687542	0.620911	4.00442e-05	0.00300558	4.83704	5.52458	46.5035	44.2641	44.3641	26.5586	28.2805	27.9363
ENSRNOG00000003177	Mat2b	chr10:25832072-25847994	-	protein_coding	-0.850614	0.554549	0.0201985	0.0534428	4.3488	5.19942	43.9767	29.7899	34.8215	24.5241	16.8983	17.5181
ENSRNOG00000003195	Caskin1	chr10:13854339-13874254	+	protein_coding	-1.01701	0.494138	0.000148976	0.00421193	0.504666	1.52168	1.97023	1.95204	1.69963	0.486911	0.311497	0.464558
ENSRNOG00000003205	Ldb2	chr14:70780623-71112552	+	protein_coding	-2.66803	0.157341	0.000162423	0.00430257	1.31626	3.9843	15.9258	12.3726	16.5152	1.74907	1.02088	1.77958
ENSRNOG00000003209	Pcp4l1	chr13:89542378-89565813	-	protein_coding	-2.44266	0.183944	0.000551557	0.00718263	0.837076	3.27974	9.16095	6.6954	10.7148	1.24714	0.588531	0.597091
ENSRNOG00000003213	Helz	chr10:95770154-95906927	+	protein_coding	-0.762854	0.589329	0.00172264	0.0125074	2.51567	3.27853	8.19291	8.15735	9.85379	4.26423	4.82799	5.09571
ENSRNOG00000003220	H3f3a	chr13:99091763-99101208	-	protein_coding	-0.611655	0.654445	0.0200178	0.0530895	6.81972	7.43137	164.928	177.467	172.669	89.7856	120.639	129.536
ENSRNOG00000003226	Mprip	chr10:46018659-46133571	+	protein_coding	-1.27061	0.414484	0.00311062	0.0172532	5.12631	6.39692	79.9891	80.1404	90.0612	26.135	35.923	41.5298
ENSRNOG00000003229	Tspan7	chrX:13261558-13279099	-	protein_coding	-1.26582	0.415864	0.0274889	0.0657085	7.13191	8.39772	354.43	292.914	366.219	84.2175	180.885	177.003
ENSRNOG00000003237	Tp53bp2	chr13:100817359-100873890	+	protein_coding	-1.92829	0.26274	5.4591e-05	0.00325376	3.19878	5.12707	36.2105	29.551	36.5416	8.1615	7.72185	8.68742
ENSRNOG00000003239	Cant1	chr10:107432506-107445522	-	protein_coding	-1.2231	0.42836	0.00174903	0.0125922	2.43334	3.65644	11.1408	11.0479	12.7068	3.93541	3.78454	5.67359
ENSRNOG00000003242	Gulp1	chr9:51263622-51538072	+	protein_coding	-2.8446	0.139217	8.35512e-06	0.00245108	0.953671	3.79827	13.0211	13.8329	11.9469	0.75691	0.944119	1.12705
ENSRNOG00000003253	Qdpr	chr14:70164650-70178284	+	protein_coding	-1.2716	0.414199	0.0184662	0.050244	2.89822	4.16982	10.9269	20.8497	21.3742	5.54753	5.94802	8.10774
ENSRNOG00000003276	Myo1d	chr10:67866940-68142864	-	protein_coding	-1.78641	0.289893	0.0135706	0.0409625	3.60516	5.39157	47.8993	29.4083	48.7479	13.8514	15.2581	6.46354
ENSRNOG00000003280	Grin2c	chr10:103798291-103816287	-	protein_coding	-0.755837	0.592203	0.00565476	0.0241367	0.253453	1.00929	1.02171	1.20791	0.827166	0.238537	0.33772	0.02239
ENSRNOG00000003283	Rcsd1	chr13:83854664-83917021	-	protein_coding	-2.01879	0.246764	0.000677121	0.00790797	2.93846	4.95725	31.7044	27.7647	30.8697	5.31119	6.07037	9.09571
ENSRNOG00000003284	Epn3	chr10:82220762-82229140	-	protein_coding	-2.03325	0.244304	0.00019011	0.00459227	0.750181	2.78343	4.72022	5.99934	7.15114	0.722932	0.741502	0.585949
ENSRNOG00000003300	Btg2	chr13:50913180-50916982	-	protein_coding	-2.81652	0.141952	0.000136719	0.00411657	3.78221	6.59873	119.103	88.1784	84.0024	15.0173	12.4755	11.0653
ENSRNOG00000003302	Flcn	chr10:46153188-46172309	-	protein_coding	-0.769792	0.586502	0.0207423	0.0543916	2.9787	3.7485	13.1017	14.6615	9.99321	6.20145	6.08573	8.59917
ENSRNOG00000003307	Gcdh	chr19:26000497-26006970	-	protein_coding	-1.44983	0.366065	0.0132018	0.0402913	2.84719	4.29702	19.235	17.4579	19.338	4.26744	5.20935	10.3927
ENSRNOG00000003328	Cdip1	chr10:10967658-10989936	+	protein_coding	-1.14639	0.451755	0.033722	0.0760576	2.11719	3.26358	6.47723	8.31682	11.7145	3.90603	4.64572	1.94827
ENSRNOG00000003330	Acsf2	chr10:82284720-82326771	-	protein_coding	-1.70896	0.305879	2.85678e-05	0.0027263	2.29544	4.0044	15.0186	15.2779	14.8531	3.578	3.72263	4.47177
ENSRNOG00000003338	Pmp22	chr10:49538588-49568583	+	protein_coding	-2.17436	0.221541	0.00108805	0.0100403	3.38859	5.56295	45.1179	48.2873	45.4771	6.87868	13.5189	9.04192
ENSRNOG00000003349	Col23a1	chr10:36741434-37028367	+	protein_coding	-1.19554	0.436623	0.00349876	0.0183096	1.49728	2.69282	5.35975	5.16978	5.88884	1.18591	2.34552	2.07668
ENSRNOG00000003357	Col3a1	chr9:52023295-52059217	+	protein_coding	-1.37178	0.386415	0.0017654	0.0126746	7.89382	9.2656	524.229	774.996	571.09	261.177	223.105	227.975
ENSRNOG00000003359	Ogt	chrX:71528988-71585908	+	protein_coding	-0.864655	0.549178	0.0026777	0.0158386	4.88084	5.7455	57.8177	50.3056	50.1713	26.2909	26.2278	33.4197
ENSRNOG00000003370	Otc	chrX:13524607-13601069	-	protein_coding	-0.623283	0.649192	0.0247968	0.0613363	0.409281	1.03256	1.0973	0.800468	1.26701	0.097621	0.563566	0.364737
ENSRNOG00000003374	LOC103690141	chr14:112719482-112946875	-	protein_coding	-1.88122	0.271455	0.00116991	0.0104345	0.644783	2.526	4.91863	3.89506	5.59515	0.227779	0.612531	0.930495
ENSRNOG00000003388	Cenpf	chr13:108132499-108178609	-	protein_coding	-0.67861	0.624767	0.0239556	0.0599942	1.09014	1.76875	2.1719	2.69156	2.37916	0.665187	1.51177	1.30701
ENSRNOG00000003400	Fmo4	chr13:80685325-80703615	-	protein_coding	-2.15548	0.224458	0.000155367	0.00422966	0.699424	2.8549	6.64185	6.18149	5.89955	0.634975	0.353327	0.935212
ENSRNOG00000003455	Zfp13	chr10:12908643-12916784	-	protein_coding	-0.823752	0.564971	0.00228754	0.0145084	0.200753	1.0245	1.15074	0.883532	1.07806	0.285496	0.003963	0.176277
ENSRNOG00000003463	Srebf1	chr10:46570996-46593009	-	protein_coding	-0.689499	0.620069	0.00645231	0.0261477	3.34323	4.03273	14.1227	17.6809	14.5199	9.11369	8.11517	10.3387
ENSRNOG00000003464	Hid1	chr10:103899150-103919605	-	protein_coding	-1.16741	0.445221	0.00239281	0.0148839	2.81474	3.98215	15.4818	15.1054	13.8683	5.08384	5.49676	7.81232
ENSRNOG00000003470	Fundc1	chrX:5549419-5566127	+	protein_coding	-1.22064	0.429091	0.00295356	0.016746	3.1605	4.38115	20.4607	20.2902	18.8037	5.91726	9.08835	9.2439
ENSRNOG00000003472	Atp11c	chrX:143346252-143453612	-	protein_coding	-0.675314	0.626196	0.036009	0.0798169	2.41106	3.08637	6.26455	6.72445	9.91927	3.54047	4.56938	4.94968
ENSRNOG00000003476	Slc6a4	chr10:63153651-63176463	-	protein_coding	-2.55998	0.169578	2.23639e-05	0.00258126	1.81088	4.37085	19.1343	17.6015	22.6477	2.36703	2.42018	2.75049
ENSRNOG00000003494	Ppfia4	chr13:51134525-51183269	-	protein_coding	-0.64415	0.63987	0.00502881	0.0225653	0.441021	1.08517	1.27744	1.29284	0.828881	0.436882	0.337589	0.301781
ENSRNOG00000003495	Prpf8	chr10:63635219-63658361	+	protein_coding	-0.779311	0.582645	0.00426549	0.0204864	4.78621	5.56552	42.4449	46.7177	50.233	23.4305	25.8686	31.004
ENSRNOG00000003496	Tbc1d9	chr19:24329023-24429909	+	protein_coding	-0.598089	0.660628	0.00133563	0.0110931	1.6253	2.22338	3.92505	3.70763	3.39242	1.85708	2.26629	2.14639
ENSRNOG00000003504	Rnaseh2a	chr19:26074987-26084679	-	protein_coding	-0.883029	0.542228	0.00860646	0.0310195	2.85042	3.73345	12.646	12.6427	11.6395	5.10351	5.67632	8.20588
ENSRNOG00000003510	Fmo2	chr13:80755058-80775264	-	protein_coding	-4.9316	0.0327673	0.000105297	0.0038093	3.94686	8.87846	502.102	435.197	474.016	13.9099	9.7464	21.8893
ENSRNOG00000003512	Gabra1	chr10:27310725-27366665	-	protein_coding	-2.14611	0.225921	0.000535281	0.00709478	0.290596	2.4367	4.27163	3.4107	5.82514	0.07885	0.21577	0.395153
ENSRNOG00000003515	Ephx1	chr13:99271366-99300579	-	protein_coding	-2.41617	0.187353	0.000468958	0.0066844	3.58376	5.99993	64.041	59.8793	65.1944	7.79034	12.3303	13.7101
ENSRNOG00000003517	Tbx2	chr10:73279119-73289921	+	protein_coding	-2.98247	0.126528	0.000345023	0.00588089	3.58542	6.56789	94.8121	84.1647	103.645	8.54565	9.77146	15.822
ENSRNOG00000003522	Mr1	chr13:72770554-72789853	-	protein_coding	-0.692558	0.618756	0.000696949	0.00800877	0.693454	1.38601	1.42174	1.78186	1.6499	0.702411	0.62135	0.53218
ENSRNOG00000003526	Sytl4	chrX:104765294-104814145	-	protein_coding	-0.860319	0.550831	0.0127557	0.0394947	0.904495	1.76481	2.49906	2.28139	2.41804	0.454868	0.928135	1.33819
ENSRNOG00000003549	Cnpy2	chr7:2737765-2742369	+	protein_coding	-0.953818	0.516264	0.00767245	0.0289669	4.93198	5.88579	50.6586	71.5743	54.1413	25.8099	34.6174	28.7893
ENSRNOG00000003553	Efemp1	chr14:113202419-113295014	+	protein_coding	-1.42948	0.371265	0.0146578	0.0429687	4.88616	6.31564	73.6306	96.5116	68.4409	42.6849	27.7332	19.6027
ENSRNOG00000003563	Blmh	chr10:63197364-63240332	-	protein_coding	-1.07049	0.476158	0.0409846	0.0881715	3.75057	4.82105	25.9217	28.2489	27.6837	7.37489	14.033	18.3675
ENSRNOG00000003587	Figf	chrX:31816436-31851715	-	protein_coding	-1.66602	0.315121	0.00254458	0.0154384	1.79343	3.45946	7.00533	12.8027	11.0464	2.15283	2.7683	2.50579
ENSRNOG00000003590	Tom1l2	chr10:46602231-46720910	-	protein_coding	-1.58593	0.333109	0.00189187	0.0131125	2.44376	4.0297	14.4124	16.5171	15.1379	3.32197	4.22035	6.13768
ENSRNOG00000003601	RGD1564463	chr13:99387950-99395842	+	protein_coding	-1.95478	0.25796	0.000177483	0.0044762	0.690034	2.64482	4.50456	6.61094	4.83911	0.576766	0.661892	0.60248
ENSRNOG00000003603	Arhgap44	chr10:51502894-51669297	-	protein_coding	-1.56022	0.339099	0.000825484	0.00863812	2.74211	4.30233	17.937	19.5344	18.7513	4.97584	4.92605	7.45676
ENSRNOG00000003614	Mgat5	chr13:43850751-44157924	+	protein_coding	-0.975667	0.508505	0.0042369	0.0203903	1.8905	2.86616	5.60529	6.9879	6.34647	2.24307	3.52436	2.47356
ENSRNOG00000003620	Fmo3	chr13:80837420-80862963	-	protein_coding	-2.04225	0.242785	9.48004e-06	0.00246193	4.2489	6.29115	70.3944	79.024	83.0604	18.4109	18.1151	17.5233
ENSRNOG00000003635	Disp1	chr13:101451932-101597570	-	protein_coding	-1.80509	0.286162	0.000522928	0.00700651	1.08477	2.88987	6.31355	6.81657	6.12302	0.829236	0.940678	1.68796
ENSRNOG00000003643	Tab3	chrX:54062935-54086339	+	protein_coding	-0.829305	0.5628	0.00641684	0.0260671	1.34771	2.17701	3.13194	3.47033	4.00664	1.14668	1.57675	1.98032
ENSRNOG00000003650	Nt5c	chr10:104052831-104054805	-	protein_coding	-1.2298	0.426377	0.0189745	0.0512721	2.48161	3.7114	12.2573	10.862	13.2929	7.62257	3.4499	3.54074
ENSRNOG00000003666	Jchain	chr14:21177237-21183542	+	protein_coding	-1.50761	0.351693	1.3851e-05	0.00253197	4.09037	5.59798	47.689	44.2709	50.5497	15.8853	15.6603	16.5703
ENSRNOG00000003674	Pir	chrX:31852323-31968152	-	protein_coding	-0.796975	0.575555	0.0402096	0.0867995	2.6945	3.49147	7.74896	10.0677	13.6926	4.29422	6.65346	5.69441
ENSRNOG00000003679	Med13	chr10:73702327-73787083	-	protein_coding	-0.67116	0.628002	0.0127152	0.0394111	3.45497	4.12613	13.9991	17.744	17.9382	8.85827	9.49906	11.7408
ENSRNOG00000003686	Tbl1x	chrX:44830849-44988551	+	protein_coding	-1.13108	0.456574	0.00116341	0.0103928	3.86426	4.99534	31.3861	30.4283	30.8831	11.6053	13.0907	16.3895
ENSRNOG00000003707	Zmym3	chrX:71299662-71313542	-	protein_coding	-1.31862	0.400919	0.00288228	0.0164963	1.45112	2.76973	5.4871	6.00803	5.97707	1.29481	1.4797	2.59205
ENSRNOG00000003715	Srpx2	chrX:104734082-104760547	+	protein_coding	-2.90331	0.133664	1.33572e-05	0.00253197	1.12832	4.03163	17.092	14.9641	14.146	1.45181	1.07063	1.05772
ENSRNOG00000003726	Scml2	chrX:35305236-35431164	-	protein_coding	-0.670797	0.62816	0.00131018	0.0109684	0.099814	0.770611	0.789185	0.529374	0.814521	0.045776	0.058049	0.112235
ENSRNOG00000003728	Xylt2	chr10:82386005-82399485	-	protein_coding	-1.60746	0.328176	0.000156256	0.00423962	1.86595	3.47341	10.95	9.99499	9.42884	2.41393	2.38496	3.19093
ENSRNOG00000003734	Cxxc5	chrX:134539398-134541531	+	protein_coding	-0.696779	0.616948	0.00060549	0.00747507	0.135982	0.832761	0.627564	0.871722	0.85472	0.087332	0.069016	0.141452
ENSRNOG00000003736	Col5a2	chr9:52092511-52238564	-	protein_coding	-1.91745	0.264722	0.000301481	0.00552197	4.65295	6.5704	80.9566	101.152	101.526	20.9789	23.5675	28.4896
ENSRNOG00000003742	Cdkl5	chrX:35599258-35771711	+	protein_coding	-1.97203	0.254893	0.000938208	0.009231	1.0991	3.07113	6.1899	6.96397	9.36702	0.768926	1.13323	1.60516
ENSRNOG00000003759	Galc	chr6:122178602-122239614	-	protein_coding	-1.0746	0.474802	0.00392016	0.019526	1.18885	2.26345	3.35418	4.23202	3.85875	1.52182	1.57963	0.821234
ENSRNOG00000003762	Smarca1	chrX:134647703-134719097	-	protein_coding	-1.36271	0.388852	0.0013905	0.0112407	0.68592	2.04863	2.89199	2.99946	3.54905	0.305013	0.688812	0.889083
ENSRNOG00000003763	Prdx4	chrX:43497763-43512991	+	protein_coding	-0.772278	0.585492	0.020264	0.0535623	4.05646	4.82874	28.5324	26.9027	26.851	20.3431	15.544	12.0452
ENSRNOG00000003772	Csrp2	chr7:53630621-53649310	+	protein_coding	-1.96356	0.256394	0.000339737	0.00585724	0.704069	2.66763	6.63716	4.76944	4.82165	0.887212	0.568394	0.460701
ENSRNOG00000003776	Amtn	chr14:21286510-21299068	-	protein_coding	-1.46618	0.361938	0.00328526	0.0177724	1.10532	2.57151	5.09426	6.36862	3.67728	1.59413	0.989309	0.929791
ENSRNOG00000003781	Atp10b	chr10:28449335-28864255	+	protein_coding	-0.982627	0.506058	0.00237567	0.0148348	0.181449	1.16408	1.2237	1.50964	1.0164	0.081878	0.023193	0.317433
ENSRNOG00000003784	Rilp	chr10:63659085-63662050	+	protein_coding	-1.23496	0.424855	0.000518579	0.00697659	1.53276	2.76772	5.49828	5.84913	6.09679	1.60612	1.74612	2.38456
ENSRNOG00000003786	Tspan6	chrX:104719940-104726816	-	protein_coding	-1.34164	0.394571	0.000305398	0.00553502	3.045	4.38665	18.9298	21.555	19.3606	6.92085	6.50678	8.45554
ENSRNOG00000003787	Lcorl	chr14:69800156-69897384	+	protein_coding	-0.774327	0.584661	0.0297638	0.0695797	1.38912	2.16345	3.95835	2.94054	3.60148	1.04838	1.57104	2.41181
ENSRNOG00000003794	Nmral1	chr10:11046024-11055158	+	protein_coding	-0.981527	0.506443	0.0022289	0.0143049	1.44354	2.42507	5.15035	4.20727	3.83666	1.51763	2.10776	1.57162
ENSRNOG00000003803	Zdhhc17	chr7:53653116-53714879	-	protein_coding	-0.747918	0.595462	0.00681084	0.0269012	2.80816	3.55608	10.42	10.1166	11.818	5.72306	5.13095	7.33543
ENSRNOG00000003815	Slc25a11	chr10:57265704-57268081	-	protein_coding	-0.847234	0.55585	0.0290125	0.0681519	3.65906	4.50629	21.5015	23.8839	19.9631	8.26709	12.1194	15.5806
ENSRNOG00000003827	Wipi1	chr10:97859727-97896525	-	protein_coding	-1.11089	0.46301	0.00295603	0.0167535	3.81781	4.9287	31.6878	34.7823	23.1548	13.1414	13.3095	12.8584
ENSRNOG00000003840	Slit2	chr14:66831848-67170361	-	protein_coding	-1.98668	0.252319	0.000324773	0.00569057	1.84688	3.83356	11.7137	15.3899	12.9059	3.12147	2.0061	2.75701
ENSRNOG00000003848	Med12	chrX:71174699-71197812	+	protein_coding	-0.844743	0.55681	0.0171106	0.0476887	2.99436	3.8391	12.8774	12.5447	14.5947	6.07333	5.75918	9.58417
ENSRNOG00000003866	Cxcr4	chr13:45314933-45318878	-	protein_coding	-0.801598	0.573714	0.0208852	0.0546774	4.65494	5.45654	43.8658	35.1949	51.1417	19.4257	27.9171	26.0709
ENSRNOG00000003870	C1qtnf2	chr10:29067102-29084035	+	protein_coding	-0.772526	0.585392	0.0186562	0.0506093	2.67008	3.44261	10.6001	9.39986	9.65367	4.45442	7.34553	4.66401
ENSRNOG00000003872	Slc40a1	chr9:52894365-52912293	-	protein_coding	-0.755283	0.59243	0.00352582	0.0183719	1.26619	2.02147	2.98129	3.09994	3.09983	1.41032	1.07586	1.78103
ENSRNOG00000003873	Cpd	chr10:63325199-63389817	+	protein_coding	-1.78687	0.2898	0.00248662	0.0152715	3.39898	5.18585	28.0437	37.1248	42.5543	7.14388	10.0025	12.0997
ENSRNOG00000003875	Ocrl	chrX:134742356-134792618	+	protein_coding	-1.19202	0.437691	0.00314156	0.0173448	1.42529	2.6173	5.47122	4.63704	5.3332	1.51629	1.26039	2.4058
ENSRNOG00000003882	Cep350	chr13:73499753-73622211	-	protein_coding	-0.598917	0.660249	0.0101964	0.0343732	2.80621	3.40513	8.93026	9.11971	10.8306	5.16933	6.01307	6.90883
ENSRNOG00000003897	Col1a1	chr10:82745801-82762789	+	protein_coding	-1.88196	0.271315	0.00468467	0.0216215	4.75493	6.63689	83.8771	140.065	81.3192	32.2823	28.1521	19.2884
ENSRNOG00000003899	Krt14	chr10:88055823-88122233	-	protein_coding	-0.977406	0.507892	0.0466649	0.0967837	0.85893	1.83634	2.07962	4.62253	1.62996	0.641052	0.824655	0.992453
ENSRNOG00000003901	Cfap36	chr14:113618964-113644779	-	protein_coding	-0.6515	0.636618	0.00667946	0.0266062	4.03464	4.68614	24.005	24.8305	25.4149	13.6731	18.4132	14.4535
ENSRNOG00000003905	Nsf	chr10:91878633-92008082	-	protein_coding	-0.87367	0.545757	0.000552545	0.00718263	3.25071	4.12438	15.597	17.291	16.4751	8.00189	8.04601	9.58988
ENSRNOG00000003915	Tmem206	chr13:110007010-110031895	+	protein_coding	-0.888773	0.540073	0.0101107	0.0342034	1.3991	2.28787	4.99571	3.18658	3.63929	1.27857	1.66787	2.01773
ENSRNOG00000003931	Arsg	chr10:97771264-97863311	+	protein_coding	-0.792028	0.577532	0.000778162	0.00841399	0.764417	1.55645	1.98819	2.16686	1.6889	0.725548	0.586759	0.79019
ENSRNOG00000003953	Rab3gap1	chr13:44615553-44648620	+	protein_coding	-0.64713	0.638549	0.00520289	0.0229777	3.69405	4.34118	17.3835	20.8905	19.6914	10.5403	12.1234	13.3152
ENSRNOG00000003955	Spata7	chr6:122603269-122648699	+	protein_coding	-0.888525	0.540166	0.0186607	0.0506123	2.24952	3.13804	8.15867	8.02349	7.25518	2.55335	3.95653	5.1052
ENSRNOG00000003956	Arhgap6	chrX:26315878-26376467	-	protein_coding	-1.344	0.393927	0.000332129	0.0057985	1.66049	3.00449	6.83552	6.1665	8.20353	1.98145	2.1436	2.37071
ENSRNOG00000003972	Tshr	chr6:115170865-115306871	+	protein_coding	-0.71659	0.608534	0.0190487	0.0514058	1.74909	2.46568	4.98583	5.23716	3.51461	2.21354	1.99863	2.94166
ENSRNOG00000003973	Cyb5r1	chr13:51229890-51236463	+	protein_coding	-1.89923	0.268086	0.000133662	0.00406661	2.43983	4.33906	20.112	17.6707	20.0315	4.26396	3.79297	5.33089
ENSRNOG00000003979	Zranb3	chr13:44661398-44798543	-	protein_coding	-0.874059	0.545609	0.00104378	0.00980539	0.775789	1.64985	2.051	1.86771	2.53169	0.646292	0.659221	0.837367
ENSRNOG00000003992	Pik3r6	chr10:55085259-55135092	+	protein_coding	-1.41132	0.375968	0.000344065	0.00588089	0.841047	2.25237	3.9604	3.5649	3.77684	0.918919	0.51908	0.971987
ENSRNOG00000003998	Sgca	chr10:82770905-82785142	-	protein_coding	-1.69225	0.309443	0.000184132	0.00455283	0.233595	1.92585	2.61073	3.47194	2.39722	0.245013	0.143996	0.141193
ENSRNOG00000003999	Adcy3	chr6:28571351-28650148	+	protein_coding	-2.04141	0.242927	0.00169538	0.0124201	0.845146	2.88655	5.97491	6.47157	6.76007	0.625998	0.383918	1.5764
ENSRNOG00000004001	Osgepl1	chr9:53084045-53097979	-	protein_coding	-0.685987	0.621581	0.0071922	0.0277642	1.86359	2.54958	5.00969	4.63554	4.92529	3.07891	2.0336	2.89483
ENSRNOG00000004009	Xpnpep2	chrX:134940615-134969996	+	protein_coding	-1.20616	0.43342	0.0249801	0.061668	4.26264	5.4688	47.0769	35.7653	48.1415	11.7306	19.5366	26.0504
ENSRNOG00000004026	Atp2b1	chr7:41114697-41220579	+	protein_coding	-1.18332	0.440336	0.00169016	0.0124079	4.54575	5.72907	48.439	52.8934	55.0098	21.6393	18.8902	27.2956
ENSRNOG00000004027	Aldh9a1	chr13:85580828-85597493	+	protein_coding	-0.960051	0.514039	0.0396246	0.0858169	4.15259	5.11265	32.7369	31.7865	36.4437	14.0779	12.6315	26.3704
ENSRNOG00000004032	Tmem94	chr10:104320743-104343396	+	protein_coding	-1.09214	0.469065	0.0112602	0.0364781	2.68219	3.77433	12.3251	12.896	12.8356	4.44719	4.38681	8.01054
ENSRNOG00000004033	Sema6a	chr18:41333551-41389510	-	protein_coding	-3.14123	0.113343	0.000204404	0.004726	1.22463	4.36586	18.0777	16.9276	24.6281	0.85397	1.3992	1.86936
ENSRNOG00000004040	Abca8	chr10:98237141-98294522	-	protein_coding	-1.97095	0.255086	7.01617e-05	0.00339194	0.403455	2.3744	3.65774	4.0828	4.8887	0.400661	0.218397	0.35592
ENSRNOG00000004049	Baiap2	chr10:109107389-109187115	+	protein_coding	-1.00242	0.499162	0.0104226	0.0348532	3.48543	4.48785	21.7305	21.0808	21.5068	7.87685	9.60351	13.9262
ENSRNOG00000004050	Snrk	chr8:130749838-130803597	+	protein_coding	-0.741245	0.598223	0.00129288	0.0109443	3.19639	3.93764	14.1843	13.8515	14.9543	8.03456	9.24054	7.3253
ENSRNOG00000004072	Myo1c	chr10:63803309-63819614	+	protein_coding	-1.75442	0.296393	0.00154844	0.0119085	4.95117	6.70559	98.5859	103.232	108.534	21.928	32.3134	37.7584
ENSRNOG00000004078	Eno3	chr10:57278307-57283653	+	protein_coding	-1.01144	0.496052	0.00761323	0.0288331	1.62309	2.63453	6.82158	4.65817	4.41063	2.18105	1.64759	2.4704
ENSRNOG00000004085	Tcaim	chr8:131845696-131875786	+	protein_coding	-0.702041	0.614702	0.00807617	0.0298692	2.26557	2.96762	7.21938	6.43927	6.82806	3.0617	3.84807	4.646
ENSRNOG00000004101	Marc1	chr13:102698546-102721218	-	protein_coding	-1.11976	0.46017	0.0177424	0.0488063	0.864852	1.98461	3.23533	2.63953	3.02115	0.803799	0.30624	1.56347
ENSRNOG00000004104	Zfp167	chr8:131933387-131950776	+	protein_coding	-0.632852	0.6449	9.22229e-05	0.00363468	0.771879	1.40473	1.62543	1.65066	1.66712	0.80237	0.651878	0.672069
ENSRNOG00000004109	Zfpm2	chr7:79638046-79964405	+	protein_coding	-1.4902	0.355963	0.001231	0.0107008	0.361989	1.85219	2.62189	3.44204	1.92533	0.381703	0.269673	0.210047
ENSRNOG00000004131	Pkn1	chr19:24803524-24831500	-	protein_coding	-1.31087	0.403077	0.00283435	0.0163146	4.36307	5.67394	53.1642	44.5446	52.9425	19.0522	15.7557	24.9368
ENSRNOG00000004146	Coro7	chr10:11090314-11143881	+	protein_coding	-1.94878	0.259036	1.87608e-05	0.00253197	1.47306	3.42184	9.55516	9.14513	10.4949	1.7016	1.62003	2.02259
ENSRNOG00000004147	Abca8a	chr10:98319480-98390384	-	protein_coding	-1.8627	0.274962	0.00126876	0.0108402	3.53037	5.39307	44.9868	40.8468	37.5592	13.0681	7.58222	11.7763
ENSRNOG00000004160	Prps2	chrX:28435507-28472880	+	protein_coding	-0.758255	0.591211	0.000162062	0.00430086	3.10373	3.86198	14.1386	12.9162	13.5918	8.07138	7.19623	7.5439
ENSRNOG00000004171	Dnah9	chr10:52351192-52710862	-	protein_coding	-0.872084	0.546357	0.00387596	0.0193834	0.99742	1.8695	2.70527	2.55383	2.70523	0.639313	1.26269	1.14522
ENSRNOG00000004172	Pdk2	chr10:82839153-82852660	-	protein_coding	-1.67138	0.313952	0.0132981	0.0405015	2.48048	4.15186	15.4808	16.7465	18.2051	2.40978	4.89959	7.64071
ENSRNOG00000004181	Sdccag8	chr13:94888078-95112033	+	protein_coding	-0.940918	0.520901	0.0462029	0.0961272	1.59322	2.53414	4.44703	4.67503	5.28672	0.947717	2.44324	3.09568
ENSRNOG00000004186	Snx13	chr6:54488038-54588778	+	protein_coding	-0.996608	0.501177	0.0230558	0.0583421	3.41546	4.41207	17.594	22.1535	21.4131	6.54115	10.671	12.8013
ENSRNOG00000004193	Klhl12	chr13:51282684-51314797	+	protein_coding	-0.589384	0.664627	0.00871471	0.0312703	3.18483	3.77421	14.5998	11.6019	12.0286	8.81538	7.19914	8.34351
ENSRNOG00000004198	Stxbp6	chr6:65089318-65319527	-	protein_coding	-1.83781	0.279747	0.00225424	0.0144172	1.3193	3.15711	6.94284	7.24004	9.84543	2.3614	0.998914	1.31277
ENSRNOG00000004200	Sybu	chr7:83600617-83670356	-	protein_coding	-0.886529	0.540914	0.0130456	0.0399835	0.179003	1.06553	1.73144	1.01034	0.669597	0.153771	0.14221	0.101008
ENSRNOG00000004208	Crim1	chr6:788548-960703	+	protein_coding	-1.20552	0.433614	0.0383604	0.0837901	4.16024	5.36575	36.0067	39.9072	45.3104	10.9338	15.178	28.6048
ENSRNOG00000004217	Stk10	chr10:17421075-17519706	+	protein_coding	-0.68417	0.622364	0.000826213	0.00863812	2.94191	3.62608	11.0782	10.7263	12.2896	6.1533	6.8793	7.05031
ENSRNOG00000004218	Klhl28	chr6:86684413-86713370	-	protein_coding	-0.744349	0.596937	0.0184524	0.0502252	1.46165	2.206	2.66044	4.06616	4.29668	1.49642	1.6737	2.13019
ENSRNOG00000004232	G2e3	chr6:72092194-72122497	+	protein_coding	-1.01574	0.494575	0.0303961	0.0705975	2.17207	3.18781	10.4851	9.15825	5.4853	2.72385	3.30251	4.71301
ENSRNOG00000004245	Mgst3	chr13:85601499-85622314	-	protein_coding	-1.21613	0.430437	0.0135558	0.0409304	3.51325	4.72937	17.4884	29.5509	32.0464	11.5032	11.315	8.66763
ENSRNOG00000004257	Ctps2	chrX:33383087-33522836	-	protein_coding	-0.747409	0.595672	0.0211193	0.055101	3.70621	4.45362	20.7602	20.4608	21.5274	8.9707	12.9863	14.9446
ENSRNOG00000004265	RGD1559731	chrX:4691172-4739890	+	protein_coding	-0.917008	0.529606	0.00363903	0.0186463	0.114997	1.03201	1.13685	1.35432	0.699635	0.002202	0.126202	0.125333
ENSRNOG00000004268	Zfp386	chr6:143901280-143917575	+	protein_coding	-0.685761	0.621678	0.0103434	0.0346678	2.87921	3.56497	13.0904	10.8579	8.92099	6.72629	6.1368	6.22286
ENSRNOG00000004280	Tcn2	chr14:84174138-84189266	-	protein_coding	-1.85564	0.276311	0.00111451	0.0101403	4.49077	6.34641	84.4406	77.4525	79.3719	17.252	19.6237	29.192
ENSRNOG00000004281	Cobl	chr14:92342957-92577936	-	protein_coding	-1.77466	0.292264	0.000303944	0.00552532	2.40983	4.18448	17.2375	17.1023	17.2082	3.32341	4.69501	5.09494
ENSRNOG00000004283	Camta2	chr10:57291192-57309298	-	protein_coding	-0.659759	0.632984	0.0383702	0.0837905	3.85398	4.51373	23.8035	20.6792	21.1693	14.6779	9.92051	16.6585
ENSRNOG00000004303	Timp3	chr7:23544215-23594133	-	protein_coding	-1.91631	0.264931	0.000125161	0.00395851	7.04827	8.96458	517.522	505.182	474.061	119.184	156.325	121.625
ENSRNOG00000004310	Caskin2	chr10:104344099-104358253	-	protein_coding	-1.79995	0.287184	0.00695895	0.0272819	3.1325	4.93245	29.1226	27.9887	31.6084	4.94857	7.29068	12.675
ENSRNOG00000004317	Vipr2	chr6:143938040-144008072	+	protein_coding	-1.25165	0.419968	0.00510623	0.0227373	0.508671	1.76032	3.53649	2.08518	1.77796	0.299011	0.492579	0.485338
ENSRNOG00000004322	Sh3kbp1	chrX:37790586-38196204	-	protein_coding	-1.50317	0.352778	0.00235184	0.0147489	1.91896	3.42212	9.51562	9.28332	10.3898	2.76604	1.93013	3.90024
ENSRNOG00000004327	Ddc	chr14:91905919-91996774	-	protein_coding	-1.64201	0.320409	0.000425601	0.00645413	0.483593	2.12561	2.74123	4.19384	3.27673	0.516917	0.395126	0.291674
ENSRNOG00000004330	Chrdl1	chrX:114554359-114658931	-	protein_coding	-1.29987	0.406163	0.000935177	0.0092086	1.18203	2.48189	4.04301	5.53342	4.29107	1.43049	1.41297	0.991738
ENSRNOG00000004344	Zdhhc3	chr8:132160172-132189388	-	protein_coding	-0.659122	0.633264	0.0115335	0.0371005	3.96193	4.62105	19.5352	28.356	23.719	14.372	14.6464	14.7339
ENSRNOG00000004346	Notch3	chr7:14138495-14189688	-	protein_coding	-2.9695	0.127671	0.000762369	0.00835473	1.45414	4.42364	18.8225	18.2632	24.8858	0.904009	1.82498	2.82415
ENSRNOG00000004360	Gemin2	chr6:80108655-80122365	+	protein_coding	-0.763648	0.589005	0.00844936	0.0306584	2.71703	3.48067	11.2768	9.22686	10.0799	6.31491	4.42938	6.15748
ENSRNOG00000004362	Rps6ka5	chr6:124557913-124735778	-	protein_coding	-0.885783	0.541194	0.00479025	0.0219209	1.18147	2.06726	2.73512	3.52884	3.35138	1.70343	0.991483	1.16713
ENSRNOG00000004364	Bre	chr6:25666655-26051229	-	protein_coding	-0.714928	0.609236	0.00300816	0.0169236	3.52682	4.24175	16.0445	18.897	18.9668	9.33835	10.8345	11.5152
ENSRNOG00000004367	Elk3	chr7:34086220-34121694	-	protein_coding	-1.84623	0.278118	0.00559448	0.0240143	2.14985	3.99608	15.8224	11.7388	17.9584	2.24075	3.14207	5.51093
ENSRNOG00000004377	Lpin1	chr6:41799749-41870046	-	protein_coding	-0.881789	0.542694	0.00168803	0.0124048	1.55314	2.43493	4.31834	4.51402	4.39155	1.50542	2.08586	2.26864
ENSRNOG00000004378	Abca5	chr10:98576039-98644938	-	protein_coding	-1.72034	0.303477	0.0181481	0.0496011	3.05805	4.7784	21.447	28.7667	29.9337	4.07244	7.17189	12.9366
ENSRNOG00000004392	Aatk	chr10:109188112-109224370	-	protein_coding	-1.09435	0.468346	0.000223235	0.00485379	0.188539	1.28289	1.34528	1.29456	1.67716	0.072463	0.137842	0.21284
ENSRNOG00000004398	Pkhd1l1	chr7:83373022-83545540	+	protein_coding	-1.29266	0.408198	0.031653	0.0726531	0.44307	1.73573	1.9931	4.43179	1.27225	0.587893	0.408678	0.123309
ENSRNOG00000004404	Tac4	chr10:83081168-83089481	+	protein_coding	-0.625263	0.648302	0.00274708	0.0160662	0.148115	0.773378	0.901265	0.72238	0.524958	0.075106	0.114546	0.135564
ENSRNOG00000004411	Tspan8	chr7:58814805-58847563	+	protein_coding	-2.17864	0.220884	0.00019299	0.00462795	4.38572	6.56436	93.7598	86.4835	101.249	18.8799	16.9464	24.6042
ENSRNOG00000004414	F11r	chr13:89826254-89850612	+	protein_coding	-1.05976	0.479713	0.0195884	0.05228	5.61994	6.6797	79.4193	94.1925	139.735	39.0754	53.4566	53.4985
ENSRNOG00000004415	Fam179b	chr6:86713604-86780147	+	protein_coding	-0.693723	0.618257	0.0222492	0.0570469	2.82162	3.51534	10.0224	10.573	10.7207	4.43704	7.02844	7.0944
ENSRNOG00000004420	Rad21	chr7:91511756-91538673	-	protein_coding	-1.02755	0.490542	0.0118737	0.0378931	4.10614	5.13369	32.0551	34.8094	35.5551	11.5552	18.3799	19.9912
ENSRNOG00000004424	RGD1563962	chr13:51317460-51331705	+	protein_coding	-1.00184	0.499361	0.0212247	0.0552778	2.26902	3.27086	9.83575	8.197	8.02355	2.46356	4.03338	5.4231
ENSRNOG00000004425	Klhdc1	chr6:91532467-91584200	+	protein_coding	-0.765354	0.588309	0.00742107	0.0283332	0.776349	1.5417	1.5141	2.15207	2.11399	0.498236	0.719355	0.950593
ENSRNOG00000004437	Map2k6	chr10:98706960-98823287	+	protein_coding	-1.22066	0.429087	0.000178211	0.0044762	0.208101	1.42876	1.87618	1.64338	1.56638	0.045344	0.1777	0.252104
ENSRNOG00000004441	Fcmr	chr13:47602692-47617064	+	protein_coding	-1.60465	0.328816	0.000964679	0.00934665	1.61375	3.21839	8.61888	7.28506	9.11762	1.45389	2.2782	2.56343
ENSRNOG00000004442	RGD1311756	chr6:124786097-124872277	+	protein_coding	-1.26641	0.415692	0.000265132	0.00523267	0.490381	1.7568	2.40549	2.10343	2.65193	0.322127	0.337686	0.567584
ENSRNOG00000004444	Ikzf1	chr14:91782354-91867424	+	protein_coding	-0.913073	0.531053	0.00130644	0.0109684	1.44704	2.36011	4.04563	4.03155	4.33063	1.82493	1.35438	2.04738
ENSRNOG00000004458	Ston2	chr6:115399326-115513354	-	protein_coding	-0.681652	0.623451	0.0177972	0.048918	1.35693	2.03858	3.08357	3.06117	3.18151	1.02433	1.73666	2.0334
ENSRNOG00000004473	Ppargc1a	chr14:63095720-63187009	+	protein_coding	-1.60664	0.328363	0.000237341	0.00496715	0.508814	2.11545	3.15746	2.93127	3.97828	0.288755	0.441659	0.550499
ENSRNOG00000004474	Klhdc2	chr6:91595823-91610799	+	protein_coding	-1.00745	0.497425	0.0024864	0.0152715	3.97624	4.98369	29.8435	30.7401	31.3554	11.9947	15.2815	17.4264
ENSRNOG00000004476	Wif1	chr7:63094911-63165159	+	protein_coding	-3.06921	0.119145	0.000160946	0.00427904	3.45232	6.52153	106.183	73.5493	96.0425	8.08051	12.2929	9.86496
ENSRNOG00000004482	Ccdc88c	chr6:124905808-125027553	-	protein_coding	-0.746706	0.595963	0.00229574	0.0145258	2.19758	2.94429	6.93593	7.2657	5.9515	3.60305	3.17347	4.02423
ENSRNOG00000004489	Adgre5	chr19:24855299-24875137	-	protein_coding	-1.33194	0.397233	0.00367015	0.0187149	5.70566	7.0376	148.09	112.453	133.066	39.3583	57.2283	59.4858
ENSRNOG00000004498	Scin	chr6:59976003-60054279	-	protein_coding	-1.13583	0.455072	0.000895979	0.00901746	0.168949	1.30478	1.21361	1.41209	1.82386	0.08652	0.247485	0.048342
ENSRNOG00000004503	L3hypdh	chr6:94824112-94834908	-	protein_coding	-0.947276	0.518611	1.69567e-05	0.00253197	0.514947	1.46222	1.81429	1.78582	1.66806	0.383745	0.41669	0.488376
ENSRNOG00000004505	Nfic	chr7:11152038-11177664	+	protein_coding	-2.70514	0.153346	0.00101943	0.0096773	2.29368	4.99881	29.6932	30.4098	32.9056	3.03031	2.86876	6.5594
ENSRNOG00000004509	Eapp	chr6:75567511-75589257	-	protein_coding	-1.08202	0.472367	0.00339969	0.0181238	4.21062	5.29264	38.3602	36.5604	39.7324	13.8831	18.088	21.3415
ENSRNOG00000004517	Igf1	chr7:28412198-28486609	+	protein_coding	-0.673525	0.626973	0.0369866	0.0814122	3.29843	3.97196	14.8399	16.3931	13.025	11.9688	7.66048	7.47887
ENSRNOG00000004520	Wdr60	chr6:144069022-144123729	-	protein_coding	-0.623203	0.649228	0.0461081	0.0959902	2.65213	3.27533	9.09878	7.32201	9.8	3.87027	6.42097	5.87225
ENSRNOG00000004540	Clec3b	chr8:132241134-132246694	+	protein_coding	-3.32796	0.0995825	0.0321191	0.0734447	1.48888	4.81684	14.5449	110.868	11.875	2.06231	0.975106	2.65554
ENSRNOG00000004542	Ttc8	chr6:122920317-122974522	+	protein_coding	-1.12894	0.457252	0.000586754	0.00739344	1.0078	2.13674	3.09977	3.30083	3.82346	0.8074	1.00308	1.24587
ENSRNOG00000004544	Ube2e3	chr3:65815080-65871363	+	protein_coding	-0.660784	0.632535	0.00760359	0.0288116	4.73955	5.40034	45.1459	35.0782	44.2495	23.4286	27.6724	26.2197
ENSRNOG00000004549	Dhx40	chr10:74080590-74119032	-	protein_coding	-0.917622	0.529381	0.0310858	0.0717474	3.39118	4.3088	18.743	19.6915	18.0558	6.20207	10.6931	12.7136
ENSRNOG00000004555	Sec14l4	chr14:84274550-84319449	+	protein_coding	-0.708456	0.611975	0.00535486	0.0234565	5.73718	6.44564	80.0877	86.6083	92.2164	46.5205	61.1675	50.3747
ENSRNOG00000004556	Dcaf5	chr6:103516586-103605256	-	protein_coding	-0.648432	0.637973	0.0133537	0.0406151	1.00452	1.65295	2.7582	1.77527	1.98179	0.992541	0.833834	1.21005
ENSRNOG00000004566	Arhgef15	chr10:55532077-55544429	-	protein_coding	-1.56921	0.336992	0.000504888	0.00687508	3.71596	5.28517	38.6995	31.6606	44.7273	12.3736	11.154	12.9598
ENSRNOG00000004585	Tmtc2	chr7:47181981-47586137	-	protein_coding	-1.06647	0.477485	0.0389252	0.0846932	2.06875	3.13523	7.01175	8.34827	8.0559	1.90071	2.87054	5.5765
ENSRNOG00000004602	Rnf145	chr10:30169257-30207498	+	protein_coding	-1.05415	0.481582	0.00466474	0.0215742	3.76964	4.82378	25.392	27.9038	28.7772	15.0705	9.72507	13.7195
ENSRNOG00000004603	Srgap1	chr7:63973279-64251110	-	protein_coding	-0.886433	0.54095	0.0171441	0.0477323	1.64921	2.53564	4.01248	4.86218	5.63436	1.46231	2.20712	2.90774
ENSRNOG00000004604	Slc38a10	chr10:109284957-109333899	-	protein_coding	-0.814698	0.568528	0.0112773	0.0364781	3.6012	4.4159	20.0545	21.8604	19.2079	8.51526	12.5997	12.8119
ENSRNOG00000004606	Meis1	chr14:103181281-103321270	-	protein_coding	-1.19794	0.435896	0.00613423	0.0253218	2.97007	4.16802	18.4559	15.7238	16.8529	6.63014	5.12189	9.29972
ENSRNOG00000004610	Lum	chr7:38819771-38826862	+	protein_coding	-0.874026	0.545622	0.00222033	0.01429	2.67819	3.55222	9.82776	11.4471	10.9775	4.689	5.24311	6.38267
ENSRNOG00000004621	Rtn4	chr14:114126943-114174458	+	protein_coding	-0.83067	0.562268	0.0191001	0.0514775	3.32117	4.15184	15.5953	18.6582	16.217	6.72164	9.23925	11.6282
ENSRNOG00000004640	Mtfp1	chr14:84330218-84334066	-	protein_coding	-0.767917	0.587265	0.022274	0.0570598	1.57811	2.34602	5.39083	3.30778	3.77373	1.74961	1.72332	2.55469
ENSRNOG00000004657	Sec23a	chr6:80060916-80107236	-	protein_coding	-1.12236	0.459342	0.0335633	0.0758054	2.03142	3.15378	6.55187	8.60172	8.7218	1.81432	2.8985	5.22713
ENSRNOG00000004666	Prr5l	chr3:91291875-91370167	-	protein_coding	-1.43612	0.369561	0.000107958	0.00383597	1.59245	3.02856	7.49242	6.88969	7.10911	1.6679	2.16707	2.2456
ENSRNOG00000004672	Sec14l2	chr14:84335597-84355528	-	protein_coding	-1.16272	0.446669	0.00228147	0.0145015	2.27342	3.43614	10.373	9.63825	9.48086	2.93165	3.94071	4.8175
ENSRNOG00000004677	Zeb2	chr3:29862473-29996865	-	protein_coding	-1.35997	0.38959	0.00990979	0.0337655	3.61437	4.97435	26.5195	29.7263	35.7392	7.89015	11.2012	15.9353
ENSRNOG00000004679	Fign	chr3:49992397-50120392	-	protein_coding	-0.9647	0.512385	0.000372483	0.00610799	0.15799	1.12269	1.12775	1.07353	1.34023	0.072487	0.055807	0.226598
ENSRNOG00000004685	Mta3	chr6:6908684-7031828	+	protein_coding	-1.40792	0.376855	0.0183312	0.0499701	2.50442	3.91234	12.797	13.9952	15.4991	3.76936	3.13686	8.25952
ENSRNOG00000004688	Rbfox2	chr7:118156946-118396728	-	protein_coding	-0.651928	0.636429	0.00626422	0.0256611	2.22634	2.87827	5.67366	6.81844	6.61814	3.06409	3.98881	4.05386
ENSRNOG00000004693	Pbx1	chr13:86390741-86451002	-	protein_coding	-1.79018	0.289137	0.00134002	0.0110996	1.61076	3.40094	9.27953	11.6434	8.06811	1.48737	2.02139	2.79066
ENSRNOG00000004696	Arhgap5	chr6:73345392-73405880	+	protein_coding	-0.945242	0.519342	0.0128387	0.0396504	3.74945	4.69469	21.9338	23.8403	29.4858	9.63426	12.8818	15.4792
ENSRNOG00000004730	Meis2	chr3:107559997-107760589	-	protein_coding	-0.806553	0.571746	0.000617553	0.0075662	2.34497	3.15152	7.76259	8.38037	7.53598	4.55072	4.05869	3.67013
ENSRNOG00000004735	Gzf1	chr3:143003796-143015904	+	protein_coding	-0.813721	0.568913	0.0342985	0.0769757	2.82638	3.6401	11.8582	11.6485	10.9156	3.98008	7.63159	7.3013
ENSRNOG00000004736	Ralgps2	chr13:74422944-74564184	-	protein_coding	-1.17578	0.442643	0.0212465	0.055317	0.740998	1.91678	2.81226	2.09727	3.55898	0.262793	0.534193	1.40977
ENSRNOG00000004753	Napb	chr3:143020454-143063983	-	protein_coding	-1.05029	0.482872	0.00209336	0.0138336	0.593187	1.64347	2.51681	2.19682	1.71229	0.389582	0.427103	0.731258
ENSRNOG00000004766	Glis2	chr10:11154658-11174861	-	protein_coding	-1.59992	0.329896	0.0179697	0.0492432	1.70562	3.30553	11.2593	8.19844	7.57063	0.922426	3.35404	3.14555
ENSRNOG00000004772	Cytip	chr3:44150992-44177689	-	protein_coding	-0.878653	0.543875	0.0155264	0.0445933	3.14695	4.02561	17.1775	15.5327	13.375	9.7211	5.83766	8.4806
ENSRNOG00000004805	Stac2	chr10:85988367-86004209	-	protein_coding	-1.73424	0.300568	0.000155599	0.00422966	0.306189	2.04042	3.71313	2.74618	2.94266	0.311926	0.116138	0.290889
ENSRNOG00000004806	Strn	chr6:1237758-1319541	-	protein_coding	-0.629996	0.646178	0.0149269	0.0434512	2.86003	3.49003	9.01076	10.6561	11.1559	5.10601	7.19728	6.64604
ENSRNOG00000004810	Plcb1	chr3:128155069-128419545	+	protein_coding	-1.67698	0.312738	5.20278e-05	0.00317866	1.0156	2.69258	5.03166	5.29185	6.11907	0.993516	1.17706	0.904095
ENSRNOG00000004819	Porcn	chrX:15035569-15048440	+	protein_coding	-1.10756	0.464077	0.000184705	0.00455283	1.95208	3.05965	8.08545	6.88679	7.0889	3.17344	2.73671	2.7147
ENSRNOG00000004823	Dock4	chr6:60566196-60782556	+	protein_coding	-1.15358	0.449509	0.000928868	0.00918947	2.77776	3.93134	14.2668	12.8228	15.8269	4.95105	6.44925	6.27542
ENSRNOG00000004831	Arid2	chr7:137680530-137795655	+	protein_coding	-0.718418	0.607764	0.00676265	0.0268274	3.0318	3.75022	11.1879	12.5128	13.7948	6.01618	7.54584	8.12292
ENSRNOG00000004844	Med30	chr7:92234597-92256100	+	protein_coding	-0.60774	0.656224	4.49025e-07	0.00163254	2.7501	3.35784	9.2905	9.15901	9.30717	5.68314	5.79778	5.70249
ENSRNOG00000004860	Myh9	chr7:118741110-118792625	-	protein_coding	-1.62444	0.324335	0.00249815	0.01531	4.95793	6.58237	81.3388	97.2887	107.734	23.1583	30.0864	38.978
ENSRNOG00000004861	Itga4	chr3:66193059-66263960	+	protein_coding	-1.24287	0.422533	0.00918199	0.0323326	2.26278	3.50565	8.47129	9.2384	14.1104	4.83544	2.96447	3.77793
ENSRNOG00000004873	Prkch	chr6:96479430-96676225	+	protein_coding	-1.28322	0.410878	0.0185689	0.0504666	3.31783	4.60104	23.3571	20.3768	26.4529	5.86007	8.81947	13.7191
ENSRNOG00000004874	Flrt3	chr3:134683065-134696654	-	protein_coding	-3.11397	0.115505	0.00020714	0.00472686	1.86066	4.97463	29.3474	28.1949	34.0838	2.48674	1.82824	3.85744
ENSRNOG00000004888	Spred2	chr14:104191517-104290456	+	protein_coding	-0.637349	0.642893	0.00384089	0.01924	1.83889	2.47624	4.08935	4.61394	5.03032	2.6621	2.22426	2.87727
ENSRNOG00000004889	Vangl2	chr13:90380632-90405591	-	protein_coding	-1.51935	0.348842	0.00931144	0.0325576	0.298157	1.81751	1.29232	3.00221	3.77312	0.216485	0.316666	0.160594
ENSRNOG00000004891	Arl14ep	chr3:97983686-97993684	-	protein_coding	-0.695707	0.617406	0.00339089	0.0180968	2.9914	3.6871	11.9023	12.8036	10.9985	6.45804	6.43032	8.07543
ENSRNOG00000004908	Smc6	chr6:36941233-36995138	+	protein_coding	-0.678563	0.624787	0.00151245	0.0117876	3.61654	4.2951	18.811	17.736	19.3834	10.367	10.8759	12.6693
ENSRNOG00000004912	Itgav	chr3:71114100-71202411	+	protein_coding	-1.10648	0.464427	0.00776917	0.0292189	2.97298	4.07946	13.185	18.7273	16.2672	5.24166	7.20277	8.45392
ENSRNOG00000004917	Rasal2	chr13:74771522-75059326	-	protein_coding	-1.68991	0.309947	0.000311049	0.00559667	1.53204	3.22194	7.52999	7.8655	9.7412	1.5853	1.8362	2.29851
ENSRNOG00000004923	Map4k5	chr6:92136992-92229260	-	protein_coding	-0.77309	0.585163	0.00218429	0.0141648	3.43868	4.21177	15.3532	18.048	19.4246	9.89722	10.575	9.10652
ENSRNOG00000004926	Mettl15	chr3:100183405-100364400	-	protein_coding	-0.82198	0.565665	0.00377271	0.019023	0.479914	1.30189	1.58307	1.51755	1.30469	0.22493	0.343714	0.648115
ENSRNOG00000004936	Sdc2	chr7:71572941-71686044	+	protein_coding	-1.6241	0.324412	0.000125377	0.00395851	1.59066	3.21476	7.46277	8.67159	8.77712	1.75977	1.92247	2.38756
ENSRNOG00000004951	Kif16b	chr3:136657480-136936674	-	protein_coding	-0.688667	0.620427	0.0496394	0.10104	3.12511	3.81377	11.0655	13.3075	15.1091	5.57024	8.25854	9.91765
ENSRNOG00000004973	Ppp2r5c	chr6:134804141-134939358	+	protein_coding	-1.2099	0.432297	0.000740579	0.00822103	4.66943	5.87934	57.7633	52.6934	63.646	21.0313	26.0263	26.6752
ENSRNOG00000004978	Prkacb	chr2:252605307-252691886	-	protein_coding	-1.30021	0.406066	0.0115045	0.0370484	3.34943	4.64965	20.0117	25.5942	27.301	6.08058	11.4976	10.9659
ENSRNOG00000005034	Arhgef25	chr7:70469312-70476340	-	protein_coding	-1.90814	0.266436	0.000506658	0.00689273	1.42523	3.33336	8.85412	10.1549	8.31624	1.29752	1.49506	2.37882
ENSRNOG00000005041	Crip2	chr6:137953545-137958490	+	protein_coding	-1.97222	0.254861	0.0007312	0.00818617	5.65788	7.6301	194.447	199.437	197.454	37.5271	51.4951	62.6341
ENSRNOG00000005046	Tspan13	chr6:55497658-55524436	-	protein_coding	-2.01963	0.246622	0.00276892	0.0161192	3.21459	5.23422	34.3524	32.0819	44.5997	5.44742	11.1559	9.20686
ENSRNOG00000005076	Bcorl1	chrX:135187468-135233839	+	protein_coding	-0.890021	0.539606	0.0140689	0.0418503	1.59549	2.48551	4.85888	4.2604	4.69912	1.34835	2.0338	2.87365
ENSRNOG00000005081	Fbxl20	chr10:86043235-86098694	-	protein_coding	-1.59943	0.330007	0.00656315	0.0263449	2.84962	4.44905	20.409	22.0189	20.1454	3.97438	6.26313	9.36582
ENSRNOG00000005093	Lgr6	chr13:51815215-51930972	-	protein_coding	-0.797222	0.575456	0.0167557	0.0470149	0.284445	1.08167	0.697309	1.46716	1.26405	0.126527	0.117538	0.435077
ENSRNOG00000005102	Ccdc53	chr7:28762417-28809280	+	protein_coding	-0.942643	0.520279	0.0110393	0.0359722	4.24064	5.18328	36.9285	36.5081	32.7195	14.1281	17.1875	23.5541
ENSRNOG00000005122	Uvssa	chr14:82623050-82658891	-	protein_coding	-0.691899	0.619038	6.27855e-05	0.00335624	1.14245	1.83435	2.53002	2.67904	2.492	1.21242	1.29205	1.12151
ENSRNOG00000005124	Plekhh2	chr6:7793735-7893769	+	protein_coding	-1.37631	0.385202	0.0272703	0.0653471	2.21743	3.59374	10.6601	10.7293	11.8675	2.1232	3.04766	6.95667
ENSRNOG00000005126	Pqlc3	chr6:42290680-42302254	-	protein_coding	-2.17693	0.221145	0.00942638	0.032769	1.96471	4.14164	14.9032	15.952	19.397	1.15003	5.2179	3.44854
ENSRNOG00000005129	Dtx3	chr7:70476729-70481796	-	protein_coding	-0.963525	0.512803	0.0124544	0.0389515	2.21639	3.17992	9.26825	8.65207	6.50988	4.43619	2.6588	4.04623
ENSRNOG00000005130	Ogdh	chr14:86414949-86613327	+	protein_coding	-0.875061	0.545231	0.00741222	0.0283301	4.76786	5.64292	44.9197	51.3476	50.9002	20.8305	28.201	30.7208
ENSRNOG00000005132	Slc52a3	chr3:147511406-147516455	+	protein_coding	-1.43729	0.369261	0.00166604	0.0122928	0.398595	1.83588	2.07131	2.78145	2.91728	0.180037	0.185643	0.637259
ENSRNOG00000005133	Mapt	chr10:92288910-92386517	+	protein_coding	-1.95591	0.257759	0.00134651	0.0111062	1.15252	3.10843	7.00822	6.42933	9.78208	1.15275	0.817239	1.80817
ENSRNOG00000005177	Tp53i3	chr13:75105615-75143441	+	protein_coding	-1.02812	0.490348	0.0354154	0.0787653	1.37239	2.40052	3.80411	5.96715	3.39758	0.924501	2.57676	1.52108
ENSRNOG00000005190	Nipal2	chr7:73339706-73450262	-	protein_coding	-1.56053	0.339027	0.000362017	0.00604051	3.35908	4.9196	29.4838	27.2136	31.2343	9.23047	7.8154	10.9787
ENSRNOG00000005196	Slc12a6	chr3:103753238-103852686	+	protein_coding	-1.61828	0.325724	0.00283505	0.0163146	1.46277	3.08105	7.38805	7.18121	7.83047	1.26429	1.39077	2.8685
ENSRNOG00000005209	Spred1	chr3:108795235-108857556	+	protein_coding	-1.14974	0.450707	0.000136607	0.00411657	2.26107	3.41081	9.25696	10.4699	9.2257	3.47052	3.78729	4.14643
ENSRNOG00000005215	Klhl4	chrX:86126157-86229563	+	protein_coding	-0.789237	0.57865	0.000291765	0.00545391	0.272419	1.06166	1.20836	0.926192	1.13797	0.204674	0.166563	0.253837
ENSRNOG00000005227	Tfap4	chr10:11206226-11223370	+	protein_coding	-0.904194	0.534331	0.00971625	0.0333318	1.74125	2.64545	6.66568	4.68334	4.6224	2.97371	2.18076	1.95652
ENSRNOG00000005228	Gnptab	chr7:28956512-29022868	+	protein_coding	-0.71394	0.609653	0.00507057	0.0226826	3.77974	4.49368	22.4589	20.3214	21.8599	10.6176	14.1304	13.7394
ENSRNOG00000005229	Sec16b	chr13:75175254-75216941	+	protein_coding	-0.910055	0.532165	0.000299506	0.0055143	0.297009	1.20706	1.156	1.51681	1.26771	0.161218	0.270064	0.257439
ENSRNOG00000005248	Slc1a4	chr14:104581190-104612597	-	protein_coding	-1.47119	0.360685	0.00575037	0.024365	1.91781	3.389	9.16719	9.73129	9.53702	2.34962	1.9441	4.47024
ENSRNOG00000005263	LOC688906	chr7:137804019-137856485	-	protein_coding	-0.767629	0.587382	0.0227107	0.0576965	3.71741	4.48504	17.6904	22.3679	24.713	9.81436	12.1338	15.0237
ENSRNOG00000005264	Sav1	chr6:92376093-92398525	-	protein_coding	-0.654716	0.635201	0.00154207	0.0118974	3.99978	4.6545	23.4818	23.024	26.1608	16.3839	13.8891	14.8179
ENSRNOG00000005275	Shmt1	chr10:47031050-47059216	-	protein_coding	-1.01724	0.494059	0.000687671	0.00796242	3.19577	4.21302	16.7194	15.9225	20.2724	8.56469	7.76349	8.17741
ENSRNOG00000005276	Csnk2a1	chr3:147713821-147757862	+	protein_coding	-0.739976	0.598749	0.0175922	0.0485931	4.53032	5.27029	33.0775	37.071	43.3087	18.1794	22.1221	26.8241
ENSRNOG00000005278	Trhde	chr7:57253023-57679795	-	protein_coding	-1.70458	0.306811	0.00011886	0.00389319	0.254346	1.95893	2.95559	2.55476	3.17891	0.35037	0.093755	0.149011
ENSRNOG00000005284	Itpka	chr3:111545007-111553604	+	protein_coding	-0.816051	0.567994	0.00437279	0.0207763	0.492358	1.30841	1.27209	1.42755	1.75434	0.267513	0.33606	0.643861
ENSRNOG00000005289	Prkd3	chr6:1548415-1622196	-	protein_coding	-1.36062	0.389414	0.00318211	0.0174434	3.09934	4.45997	18.5764	20.6838	24.1121	5.84464	7.55861	9.74562
ENSRNOG00000005292	Trip11	chr6:125742796-125812517	-	protein_coding	-0.924291	0.526939	0.017327	0.0481257	2.86395	3.78824	11.6091	13.4183	13.5052	4.47717	6.47705	8.42145
ENSRNOG00000005310	Cul1	chr4:77211692-77280250	+	protein_coding	-0.590373	0.664171	0.00156556	0.0119562	4.88064	5.47102	43.6295	44.6212	41.858	25.7608	29.1315	30.706
ENSRNOG00000005331	Vapb	chr3:171832500-171868647	+	protein_coding	-0.73116	0.602419	0.04649	0.0964898	3.85483	4.58599	20.1914	24.9257	24.216	9.80706	13.5743	18.2295
ENSRNOG00000005334	Acvr2a	chr3:32947378-33034282	+	protein_coding	-0.925326	0.526562	2.15674e-05	0.00255464	1.94826	2.87359	6.66175	6.07819	6.25872	2.75056	2.87447	2.95503
ENSRNOG00000005342	Rassf5	chr13:47956790-48022333	-	protein_coding	-0.953494	0.51638	0.0130047	0.0399269	1.43976	2.39326	3.23089	5.02962	4.68338	1.31505	1.57581	2.34782
ENSRNOG00000005345	Vsnl1	chr6:37001356-37122023	-	protein_coding	-2.90126	0.133854	0.00649745	0.0262402	0.429799	3.33106	5.11711	6.75915	20.4728	0.389991	0.391391	0.263822
ENSRNOG00000005348	Pamr1	chr3:92403582-92502089	+	protein_coding	-1.33233	0.397127	0.0051461	0.0228283	1.52551	2.85784	7.82744	5.46698	5.67345	1.48321	2.75949	1.55583
ENSRNOG00000005352	Elf4	chrX:135240451-135250519	-	protein_coding	-0.746074	0.596224	0.0272458	0.0653099	1.90002	2.64609	4.4058	5.24806	6.26199	2.51674	2.11053	3.75242
ENSRNOG00000005355	Ncstn	chr13:90451044-90467256	-	protein_coding	-0.594907	0.662087	0.00511495	0.0227552	4.72642	5.32133	36.0586	43.6127	37.6624	23.6952	24.853	28.0575
ENSRNOG00000005357	Ctc1	chr10:55596148-55616889	+	protein_coding	-1.31528	0.401847	0.00650791	0.0262537	2.7516	4.06688	15.3377	15.4491	16.5158	4.3481	5.0321	8.46841
ENSRNOG00000005358	Pmm1	chr7:123183506-123193761	-	protein_coding	-1.35966	0.389674	0.0101014	0.0341934	4.22507	5.58473	46.1615	50.9003	44.16	13.4118	15.337	26.7796
ENSRNOG00000005376	Mad2l1	chr4:97531083-97537086	+	protein_coding	-0.76759	0.587398	0.0199314	0.052914	1.67647	2.44406	4.52472	3.70416	5.20031	1.82356	3.03927	1.86354
ENSRNOG00000005390	Nup210	chr4:122644135-122741110	-	protein_coding	-1.41907	0.373954	0.000622769	0.0075981	1.7199	3.13896	8.70914	6.2561	8.70245	2.41551	2.35938	2.11535
ENSRNOG00000005391	Prex2	chr5:7627771-7941822	-	protein_coding	-2.98734	0.126102	0.00125265	0.0107604	2.72527	5.71261	42.8618	51.2941	61.8726	4.24139	4.23585	9.53739
ENSRNOG00000005393	Sertad2	chr14:104821215-104886197	+	protein_coding	-1.01996	0.49313	0.0219837	0.0565985	1.8118	2.83176	4.99505	8.7533	5.17152	1.93578	2.40072	3.33437
ENSRNOG00000005397	Maea	chr14:82664249-82697673	-	protein_coding	-1.28502	0.410366	0.0212689	0.055317	3.98481	5.26983	46.6381	24.2828	46.6817	11.7455	15.2461	18.1664
ENSRNOG00000005434	Sptbn1	chr14:114518816-114692764	-	protein_coding	-2.09909	0.233405	0.00633216	0.0258389	6.67478	8.77387	393.098	403.736	524.799	63.4485	102.673	158.605
ENSRNOG00000005437	Rida	chr7:73256508-73270308	-	protein_coding	-0.957783	0.514847	0.00286835	0.0164331	2.7041	3.66188	10.9322	13.5541	10.6763	6.12623	5.90136	4.62667
ENSRNOG00000005446	Gna11	chr7:11033317-11047437	+	protein_coding	-1.09938	0.466716	0.00256029	0.0154922	2.8386	3.93798	15.8129	13.3892	13.8824	4.83407	6.70559	7.14197
ENSRNOG00000005447	Ypel2	chr10:74243812-74298599	-	protein_coding	-1.01869	0.493563	0.00281528	0.0162535	1.07694	2.09563	2.84528	4.10374	2.97856	0.954754	1.01976	1.37782
ENSRNOG00000005470	Atxn3	chr6:125819640-125853461	-	protein_coding	-0.984615	0.50536	0.0110481	0.0359929	2.17908	3.16369	7.61803	7.781	8.50923	4.11267	2.36348	4.40088
ENSRNOG00000005479	AC109112.1	chr3:92640752-92665644	+	protein_coding	-0.591546	0.663631	0.0307813	0.0712565	0.427997	1.01954	0.648078	1.26829	1.22876	0.264901	0.243146	0.548608
ENSRNOG00000005492	Hpcal1	chr6:43001948-43109071	+	protein_coding	-1.2909	0.408697	0.000194489	0.0046484	3.90602	5.19692	34.0315	39.7889	33.5367	13.0932	15.2654	13.6964
ENSRNOG00000005522	Sh3yl1	chr6:49852130-49895510	+	protein_coding	-0.618444	0.651373	0.0121224	0.0383778	3.06969	3.68813	12.7517	11.0298	11.9449	6.0885	8.66131	7.64198
ENSRNOG00000005530	Rps6kl1	chr6:108961994-108976489	-	protein_coding	-1.90278	0.267428	0.000440533	0.00657432	0.367608	2.27039	3.34612	4.43306	3.75572	0.167849	0.15428	0.593254
ENSRNOG00000005540	Nin	chr6:92433381-92527711	-	protein_coding	-1.21528	0.430689	0.00267916	0.0158386	1.74724	2.96252	6.57627	6.23471	7.6407	1.67537	2.63102	2.89497
ENSRNOG00000005565	Traf3ip3	chr13:111892760-111917587	-	protein_coding	-1.71811	0.303946	0.00111999	0.0101673	1.06274	2.78085	6.1004	4.55828	7.22501	1.21358	0.766763	1.33064
ENSRNOG00000005568	Pcnx4	chr6:95323579-95360127	+	protein_coding	-1.03759	0.487139	0.00989739	0.0337655	1.72501	2.7626	5.97397	5.26037	6.15815	1.47807	3.11009	2.54711
ENSRNOG00000005569	Phospho1	chr10:83636518-83643859	+	protein_coding	-0.63447	0.644177	0.0206798	0.0542962	0.129964	0.764434	0.935694	0.341767	0.88729	0.094975	0.075194	0.112956
ENSRNOG00000005573	Ntn4	chr7:34533543-34649481	+	protein_coding	-2.15302	0.224842	0.000448922	0.00660075	2.53426	4.68727	22.9757	24.6298	26.8301	3.44142	5.82875	5.40915
ENSRNOG00000005575	Abi3	chr10:83644086-83655182	-	protein_coding	-1.30415	0.404959	0.0404805	0.0872163	2.24776	3.55191	14.8406	8.78136	9.41174	2.58637	2.72521	7.01905
ENSRNOG00000005580	Itgb4	chr10:104523996-104561078	+	protein_coding	-1.09624	0.467735	0.00393503	0.0195715	1.29801	2.39425	3.72996	5.56788	3.67667	1.71719	1.19959	1.48747
ENSRNOG00000005610	Yipf4	chr6:22126870-22138286	-	protein_coding	-0.663272	0.631444	0.00257897	0.0155376	3.84594	4.50921	21.4252	21.6334	22.2667	11.7268	13.5291	15.0793
ENSRNOG00000005616	Ncoa3	chr3:162692185-162787548	+	protein_coding	-1.46148	0.36312	0.00441652	0.020915	2.76402	4.2255	15.8964	17.64	19.7856	4.37145	5.25908	8.32294
ENSRNOG00000005619	RGD1310262	chr19:25132094-25134055	-	protein_coding	-2.26244	0.208419	0.0123357	0.038705	1.4698	3.73225	12.2152	13.0378	11.6527	1.32128	0.650748	4.54571
ENSRNOG00000005621	Gxylt2	chr4:133179309-133262841	+	protein_coding	-1.78462	0.290253	5.88576e-05	0.00331589	0.374346	2.15896	3.92565	3.27623	3.22878	0.298185	0.189234	0.410796
ENSRNOG00000005623	Ankmy2	chr6:55648021-55689218	+	protein_coding	-1.8241	0.282418	0.00212089	0.0139314	1.88628	3.71038	10.9249	11.9226	13.5546	1.9304	2.35356	4.14101
ENSRNOG00000005641	Fbxl4	chr5:36555109-36629689	+	protein_coding	-1.0009	0.499687	0.00936652	0.0326269	1.5776	2.57851	5.00031	4.87954	5.04097	1.44824	1.72633	2.98368
ENSRNOG00000005673	Runx1t1	chr5:27312928-27442841	+	protein_coding	-1.15084	0.450363	0.00728056	0.0279665	0.593164	1.744	1.52056	3.29025	2.47546	0.513184	0.420956	0.596643
ENSRNOG00000005700	Nsg1	chr14:77380262-77401996	+	protein_coding	-1.25387	0.419322	0.000390615	0.00622204	0.57737	1.83124	2.72958	2.11156	2.88273	0.566437	0.539768	0.377365
ENSRNOG00000005707	Bfsp1	chr3:137935345-137969658	-	protein_coding	-0.746427	0.596078	0.00310468	0.0172268	0.730601	1.47703	1.82082	1.91238	1.62583	0.439138	0.857692	0.708921
ENSRNOG00000005708	Mmp16	chr5:31568419-31810484	+	protein_coding	-1.31174	0.402834	0.000126893	0.00398574	0.609906	1.92165	2.67936	2.55919	3.15238	0.649357	0.436211	0.500608
ENSRNOG00000005711	Ptprd	chr5:92862267-93244202	-	protein_coding	-2.66694	0.15746	9.9526e-06	0.00250506	2.10914	4.77608	25.8715	27.1512	26.1922	3.39948	2.82235	3.77543
ENSRNOG00000005713	Ccdc82	chr8:11888591-11927919	+	protein_coding	-1.11128	0.462882	0.00926117	0.0324778	1.4227	2.53398	5.37158	3.82838	5.31488	1.49097	1.21672	2.48936
ENSRNOG00000005767	Tulp3	chr4:161637892-161658519	-	protein_coding	-1.15488	0.449103	0.00879002	0.0314009	2.6125	3.76738	12.7956	12.448	12.6109	3.64475	4.94891	7.27799
ENSRNOG00000005770	Sostdc1	chr6:55812747-55817066	+	protein_coding	-0.981395	0.50649	0.0101737	0.0343286	0.0901219	1.07152	1.43296	0.57799	1.41789	0	0.143294	0.054946
ENSRNOG00000005772	Hacd4	chr5:106732513-106758032	-	protein_coding	-2.11586	0.230708	7.90466e-06	0.00244591	0.64074	2.7566	5.94146	5.86049	5.48113	0.49367	0.487291	0.706065
ENSRNOG00000005780	Adamts13	chr3:5519990-5558166	+	protein_coding	-1.39021	0.381508	0.000203884	0.004726	0.499403	1.88962	2.89044	2.74183	2.49472	0.27304	0.384275	0.60303
ENSRNOG00000005783	Dlg5	chr15:120372-228977	+	protein_coding	-0.936008	0.522677	0.00265066	0.0157893	1.71251	2.64851	5.01647	5.23942	5.56691	1.75594	2.35268	2.80965
ENSRNOG00000005788	Cdk5rap2	chr5:86387078-86554102	-	protein_coding	-1.37058	0.386735	0.000287429	0.00540761	1.43955	2.81013	5.98297	5.6161	6.46718	1.42493	1.65315	2.10155
ENSRNOG00000005792	Ankef1	chr3:129501105-129536422	+	protein_coding	-1.07948	0.473198	0.0219907	0.0566013	0.488739	1.56822	2.30573	1.32052	2.39934	0.123889	0.269396	0.936668
ENSRNOG00000005796	Ctnna1	chr18:27923572-28055960	+	protein_coding	-0.811475	0.569799	0.0307091	0.0711263	5.82262	6.6341	88.069	101.849	105.969	40.7115	58.8096	71.6649
ENSRNOG00000005798	Cav3	chr4:144382945-144398917	+	protein_coding	-0.792202	0.577462	0.00359666	0.0185615	0.0659259	0.858128	0.728671	0.606672	1.14451	0.072879	0	0.069021
ENSRNOG00000005809	Arhgdib	chr4:170913923-170932618	-	protein_coding	-0.63723	0.642946	0.000445237	0.00659902	5.47885	6.11608	69.1176	69.7951	66.2258	40.3414	44.8008	45.8416
ENSRNOG00000005849	Aco1	chr5:56425024-56481218	+	protein_coding	-1.94582	0.259568	0.00213261	0.0139518	2.55703	4.50284	20.861	23.4651	20.7899	3.56568	4.26138	7.48436
ENSRNOG00000005854	Angpt1	chr7:81342280-81592206	-	protein_coding	-2.70715	0.153132	0.00526874	0.0231764	2.13789	4.84504	24.6455	26.5654	32.5837	1.59411	3.06627	7.082
ENSRNOG00000005861	Hsd11b1	chr13:111926442-111972603	-	protein_coding	-1.7742	0.292357	0.000485117	0.00680333	3.88011	5.65431	43.8427	58.6771	46.7362	15.064	11.5346	14.8534
ENSRNOG00000005872	Tcf7	chr10:37617279-37645802	-	protein_coding	-2.58231	0.166973	0.000106596	0.0038093	1.3307	3.91301	14.1653	12.2033	16.0712	1.14016	1.54073	1.9264
ENSRNOG00000005874	Tle2	chr7:10988532-11003785	-	protein_coding	-1.00256	0.499113	0.00519459	0.022962	1.74903	2.75159	7.02626	5.492	4.86192	2.5699	1.84364	2.7411
ENSRNOG00000005882	Tle1	chr5:88546568-88629491	-	protein_coding	-1.41082	0.376097	0.000556989	0.00721308	2.59019	4.00101	16.2304	12.4523	16.7084	4.5788	5.0391	5.48127
ENSRNOG00000005902	Ccdc34	chr3:101156212-101191363	+	protein_coding	-0.965365	0.512149	0.00139013	0.0112407	0.505222	1.47059	1.97535	1.45959	1.90852	0.477863	0.26178	0.533355
ENSRNOG00000005908	Dmtf1	chr4:21862313-21902762	+	protein_coding	-0.699517	0.615778	0.00695573	0.0272808	3.12933	3.82885	12.3811	13.848	13.4421	6.6015	7.52514	9.33867
ENSRNOG00000005923	Mtmr2	chr8:12284528-12333316	+	protein_coding	-0.675722	0.626019	0.00205234	0.0136932	4.41177	5.0875	29.9211	32.0553	37.4566	20.8107	19.9052	20.1498
ENSRNOG00000005931	Cpq	chr7:71709157-72167417	+	protein_coding	-0.907046	0.533276	0.00814893	0.0300025	4.23641	5.14345	27.1951	39.9268	37.2665	19.905	17.7716	16.0649
ENSRNOG00000005932	Megf9	chr5:86586996-86696388	-	protein_coding	-0.906448	0.533497	0.0113694	0.0367109	2.00699	2.91344	5.5431	7.26462	6.90841	2.37458	2.78393	4.08544
ENSRNOG00000005933	Yap1	chr8:6135493-6203579	-	protein_coding	-0.928554	0.525385	0.0367607	0.0810508	3.80959	4.73814	23.2832	24.8376	29.2979	9.18912	12.43	19.1461
ENSRNOG00000005955	Naalad2	chr8:17454122-17525906	-	protein_coding	-1.59357	0.33135	0.00119984	0.0105359	0.497317	2.09089	2.86113	2.7519	4.33699	0.250527	0.397296	0.609684
ENSRNOG00000005956	Erich5	chr7:73222730-73242899	+	protein_coding	-0.867529	0.548085	0.0173309	0.0481273	0.305743	1.17327	1.2697	0.950569	1.59084	0	0.206507	0.565249
ENSRNOG00000005960	RGD1311744	chr8:43315592-43336304	-	protein_coding	-0.783232	0.581064	0.0133469	0.0406151	0.654735	1.43797	1.42862	2.33278	1.45723	0.689392	0.706549	0.353428
ENSRNOG00000005970	Lrrc1	chr8:84720551-84835060	-	protein_coding	-0.608793	0.655745	0.0112735	0.0364781	2.72711	3.3359	9.39265	10.2099	7.83673	4.91417	5.6526	6.37803
ENSRNOG00000005990	Wdsub1	chr3:45925008-45955449	-	protein_coding	-1.29253	0.408234	0.000563373	0.00726942	1.48517	2.7777	5.43635	5.97648	6.18183	2.1884	1.39617	1.87176
ENSRNOG00000006025	Lamb3	chr13:112031594-112073186	+	protein_coding	-1.22838	0.426796	0.000605486	0.00747507	4.37652	5.6049	45.8379	54.8571	43.0612	17.8828	21.3339	20.2501
ENSRNOG00000006027	Eif2ak4	chr3:110159708-110249217	+	protein_coding	-0.888281	0.540257	0.00195644	0.0133272	1.83345	2.72173	5.90035	5.51091	5.38936	2.70693	2.04366	3.01201
ENSRNOG00000006028	Tubgcp6	chr7:130080895-130101858	-	protein_coding	-0.679171	0.624524	0.00623128	0.0255632	1.52217	2.20134	3.6064	3.56095	3.63013	2.03764	1.41144	2.23478
ENSRNOG00000006033	Spon2	chr14:82818663-82824599	+	protein_coding	-2.15345	0.224774	0.0178495	0.0490152	1.82963	3.98309	16.209	14.5425	13.7846	5.0265	3.40544	0.691486
ENSRNOG00000006060	Matn2	chr7:72985495-73207695	+	protein_coding	-1.17133	0.444011	0.0212655	0.055317	1.38681	2.55815	3.52859	7.78777	4.13328	1.61973	2.0329	1.25062
ENSRNOG00000006063	Phf21a	chr3:81134505-81271849	+	protein_coding	-0.618674	0.651269	0.00991461	0.0337655	3.38596	4.00463	15.4497	13.8005	15.9868	8.74313	8.5053	11.3357
ENSRNOG00000006069	Eif2ak3	chr4:98648545-98709694	+	protein_coding	-0.898085	0.536599	0.00402666	0.0198237	2.5904	3.48849	10.6525	9.49939	10.5567	4.00501	5.20705	6.03196
ENSRNOG00000006086	Lynx1	chr7:115982876-115988090	-	protein_coding	-0.590701	0.66402	0.000464538	0.00667566	0.0724408	0.663142	0.653794	0.613416	0.488158	0.099577	0.031919	0.024588
ENSRNOG00000006103	Tbc1d31	chr7:97760134-97839668	+	protein_coding	-1.93545	0.261439	0.000814667	0.00861651	0.894402	2.82986	6.27061	5.25871	6.89878	0.533681	0.753836	1.38782
ENSRNOG00000006108	Gngt2	chr10:83655460-83658589	+	protein_coding	-1.16055	0.447341	0.0105685	0.035123	3.07835	4.2389	21.3512	18.4272	14.5023	5.35965	8.82364	8.64535
ENSRNOG00000006120	Shh	chr4:718538-727691	-	protein_coding	-0.955397	0.5157	0.0337796	0.0761403	0.538053	1.49345	1.12411	2.07381	2.41875	0.283579	0.216538	0.96048
ENSRNOG00000006136	Pdpk1	chr10:13451624-13515448	-	protein_coding	-0.767974	0.587242	0.0163518	0.0461935	3.24882	4.01679	12.6662	16.1155	17.1338	7.1273	8.17982	10.5132
ENSRNOG00000006143	Ngly1	chr15:10405164-10455956	-	protein_coding	-0.75445	0.592773	0.0050273	0.0225653	3.67948	4.43393	19.7368	20.4275	21.726	9.74853	12.5599	13.4309
ENSRNOG00000006170	Bach2	chr5:47546014-47807166	+	protein_coding	-1.04138	0.485863	0.000738948	0.00822103	0.625642	1.66702	1.93758	2.27574	2.32789	0.734171	0.375848	0.539389
ENSRNOG00000006178	Dync1h1	chr6:134958854-135085769	+	protein_coding	-0.931156	0.524438	0.0162541	0.0459799	4.35403	5.28518	34.5217	38.1138	41.6748	14.6693	19.5167	25.6024
ENSRNOG00000006185	Etaa1	chr14:102290418-102293677	-	protein_coding	-2.50582	0.176065	3.72818e-06	0.00229601	0	2.50582	5.03932	4.1574	4.88253	0	0	0
ENSRNOG00000006206	Tmem106b	chr4:39517548-39535169	+	protein_coding	-1.46205	0.362978	0.0135485	0.0409304	2.63514	4.09719	15.6557	15.7262	16.9957	3.04724	5.40167	8.25372
ENSRNOG00000006248	Trim37	chr10:74436208-74568493	+	protein_coding	-0.683591	0.622614	0.0471813	0.0974241	2.39073	3.07432	6.93786	7.05735	8.34307	2.8415	5.47904	4.79469
ENSRNOG00000006263	Sh2d1a	chrX:128897181-128925407	+	protein_coding	-0.99577	0.501468	0.00124579	0.0107267	0.752031	1.7478	2.60629	2.06229	2.43016	0.928304	0.620929	0.528311
ENSRNOG00000006298	Cpne3	chr5:33528154-33574596	-	protein_coding	-1.08484	0.471445	0.000792014	0.00849017	3.35143	4.43627	18.3093	22.8779	21.0084	8.88679	8.48174	10.3423
ENSRNOG00000006328	Wwp1	chr5:33609136-33664435	-	protein_coding	-1.47186	0.360517	0.0088677	0.0315854	3.54797	5.01983	28.0889	29.2447	37.8133	7.50123	10.3289	15.6137
ENSRNOG00000006331	Elovl5	chr8:85259982-85285983	+	protein_coding	-1.31743	0.401248	0.00211914	0.0139262	4.38157	5.69901	48.0852	50.5352	54.4194	15.2748	22.0765	23.114
ENSRNOG00000006334	Txndc16	chr15:19473373-19541815	-	protein_coding	-0.8071	0.57153	0.00153053	0.0118712	2.27916	3.08626	7.18744	7.76399	7.53724	3.86648	3.29501	4.47148
ENSRNOG00000006336	Fyco1	chr8:132844043-132911193	-	protein_coding	-1.144	0.452505	0.0153432	0.0442466	2.44039	3.58439	9.2599	11.0609	12.9476	2.90095	4.82377	6.03909
ENSRNOG00000006338	Lrp6	chr4:168194927-168323751	-	protein_coding	-1.01188	0.4959	0.015771	0.0451047	3.41264	4.42452	17.4197	21.8722	22.5043	7.83334	8.41438	13.5213
ENSRNOG00000006355	Akap8l	chr7:14340170-14369821	-	protein_coding	-1.20798	0.432873	0.0181402	0.0495889	3.78576	4.99375	36.2615	29.1774	27.7647	11.4075	9.37785	19.3747
ENSRNOG00000006378	Mga	chr3:111699021-111759911	+	protein_coding	-0.713279	0.609932	0.0104362	0.0348706	2.95061	3.66389	10.7328	11.1633	13.2682	6.3128	5.84605	8.22879
ENSRNOG00000006392	Xrcc6	chr7:123259761-123280612	+	protein_coding	-1.1512	0.450251	0.00460383	0.0214975	2.02429	3.17549	7.73921	8.15407	8.2186	2.31249	2.83952	4.29277
ENSRNOG00000006394	Tbc1d10a	chr14:84417320-84445034	+	protein_coding	-0.852809	0.553706	0.00691563	0.0271903	3.11678	3.96959	16.423	12.7985	14.9934	6.51433	7.40402	9.33605
ENSRNOG00000006400	Tbc1d14	chr14:79205466-79438764	+	protein_coding	-1.24772	0.421112	0.00115016	0.0103356	3.48156	4.72928	26.2002	22.718	27.928	8.74479	12.0968	9.92005
ENSRNOG00000006410	Akap5	chr6:99356509-99361909	+	protein_coding	-6.68949	0.00968866	9.26973e-06	0.00245108	0.347282	7.03677	111.511	127.284	155.844	0.304665	0	0.578076
ENSRNOG00000006412	Zhx1	chr7:97915581-97944491	-	protein_coding	-1.18283	0.440487	0.00160801	0.0120987	2.93522	4.11805	14.1024	16.1994	19.1563	5.85329	6.53067	7.67041
ENSRNOG00000006440	Ift27	chr7:119393384-119409710	-	protein_coding	-1.38991	0.38159	0.0225132	0.0573877	2.46735	3.85725	17.104	10.4842	13.641	4.6085	2.67473	7.20662
ENSRNOG00000006483	Heatr5a	chr6:72648662-72750170	-	protein_coding	-0.827339	0.563568	0.00792141	0.0295747	2.35477	3.18211	8.5691	9.55082	6.40579	3.7799	3.97216	4.63123
ENSRNOG00000006490	Neo1	chr8:63653266-63750531	-	protein_coding	-1.67191	0.313837	0.000165359	0.00434469	2.61493	4.28684	20.1789	17.1231	18.3761	4.67668	4.72826	6.06963
ENSRNOG00000006494	Tubg2	chr10:89069256-89075585	+	protein_coding	-0.652508	0.636174	0.00764924	0.0289243	0.265148	0.917655	1.14027	0.904747	0.65356	0.333218	0.150256	0.131766
ENSRNOG00000006508	Thnsl2	chr4:98976550-98995590	-	protein_coding	-1.77374	0.292451	9.78291e-05	0.0037539	1.14184	2.91558	7.42046	6.04479	6.24146	1.09449	1.07947	1.46693
ENSRNOG00000006509	Srgap3	chr4:144638335-144869919	-	protein_coding	-0.813265	0.569093	0.0061709	0.0254303	0.289391	1.10266	0.925826	1.54021	1.02446	0.15901	0.133782	0.389087
ENSRNOG00000006526	Sema3c	chr4:14318274-14490446	-	protein_coding	-3.45971	0.0908917	0.000404762	0.00631541	2.31142	5.77113	49.5221	54.9101	56.66	2.46792	3.80955	6.33239
ENSRNOG00000006534	Crbn	chr4:138866761-138885556	-	protein_coding	-0.879672	0.543491	0.0196839	0.0524579	3.30414	4.18381	16.4725	16.7025	18.4074	6.45566	9.01604	11.9048
ENSRNOG00000006545	Sept7	chr8:26413233-26476611	+	protein_coding	-1.09806	0.467145	0.0220128	0.0566304	4.45928	5.55734	38.2358	50.2008	50.9776	14.1076	24.9961	26.1034
ENSRNOG00000006548	Mrc2	chr10:93520132-93581296	+	protein_coding	-2.25398	0.209645	0.000375872	0.00611281	2.33813	4.59212	19.22	28.241	22.7313	5.07569	3.63279	3.59312
ENSRNOG00000006553	Bnc2	chr5:102415847-102786331	-	protein_coding	-0.787957	0.579164	0.00875389	0.031318	0.423104	1.21106	0.879807	1.69879	1.44577	0.388462	0.244686	0.394784
ENSRNOG00000006554	Fam149b1	chr15:4361862-4399685	-	protein_coding	-1.09299	0.468789	0.0013938	0.0112519	2.87491	3.9679	15.7326	13.0293	15.3219	6.30363	5.41593	7.42371
ENSRNOG00000006570	Plekhg3	chr6:99625306-99655362	+	protein_coding	-0.930073	0.524832	0.00441777	0.020915	1.60707	2.53715	4.24958	5.89037	4.40637	2.31565	1.64868	2.2191
ENSRNOG00000006582	Aptx	chr5:56987909-57008859	-	protein_coding	-0.653134	0.635897	0.0311855	0.071932	2.32753	2.98066	6.51294	7.19695	6.98626	2.99258	3.94593	5.40421
ENSRNOG00000006587	Setd3	chr6:132023945-132075875	-	protein_coding	-0.860836	0.550633	0.0104083	0.0348211	4.09626	4.9571	27.0497	31.7384	31.6378	12.4526	17.8568	18.7251
ENSRNOG00000006588	Meox2	chr6:56625650-56689238	+	protein_coding	-0.709858	0.61138	0.0426524	0.0906466	3.08471	3.79457	11.3134	14.8491	12.6914	10.2219	7.13749	5.68669
ENSRNOG00000006611	Nostrin	chr3:55369214-55433843	+	protein_coding	-1.90824	0.266417	0.00262587	0.0156974	4.33541	6.24365	79.3961	61.8	85.1747	15.4713	16.5198	27.5105
ENSRNOG00000006620	Xcr1	chr8:132911486-132919110	-	protein_coding	-0.713204	0.609964	0.00104066	0.00978937	0.0446617	0.757865	0.560378	0.88288	0.645766	0.045616	0	0.049449
ENSRNOG00000006631	Sema3e	chr4:17272511-17594598	-	protein_coding	-1.76415	0.294401	0.000709654	0.00807013	2.82083	4.58498	20.4287	25.3098	23.5207	5.22855	7.89137	5.36954
ENSRNOG00000006644	Kdm4c	chr5:90818736-91065388	+	protein_coding	-0.706589	0.612767	0.00816097	0.0300271	2.61253	3.31912	8.16166	8.54273	10.3715	4.28131	5.38699	5.7813
ENSRNOG00000006645	Ryr3	chr3:104118063-104504204	-	protein_coding	-0.61344	0.653636	0.0165647	0.046668	0.636582	1.25002	1.20676	1.27942	1.67487	0.50641	0.356676	0.838532
ENSRNOG00000006653	Slc38a4	chr7:138459504-138512952	-	protein_coding	-0.795057	0.57632	0.000485931	0.00680819	0.148153	0.94321	1.0107	0.923786	0.837809	0.115415	0.196523	0.0196187
ENSRNOG00000006663	Usp2	chr8:48406260-48430885	+	protein_coding	-1.0897	0.469859	0.000682956	0.00792676	0.797221	1.88692	2.95308	2.94586	2.24327	0.756821	0.866342	0.600455
ENSRNOG00000006670	Rai2	chrX:34731891-34794589	-	protein_coding	-1.9663	0.255908	0.00111095	0.0101403	1.07425	3.04055	7.62629	6.74003	7.34302	0.7844	0.806128	1.8967
ENSRNOG00000006684	Zfp317	chr8:19886382-19903742	+	protein_coding	-1.05484	0.481351	0.00428408	0.0205486	1.63719	2.69203	5.71769	5.05047	5.63951	1.45399	2.36627	2.64343
ENSRNOG00000006699	Mlh3	chr6:109059341-109095557	-	protein_coding	-1.05341	0.481827	0.00312874	0.0173008	1.54535	2.59876	5.23042	4.95933	4.98686	2.06725	1.34857	2.45171
ENSRNOG00000006720	Rnpep	chr13:52092859-52111363	-	protein_coding	-0.900249	0.535794	0.00313998	0.0173448	3.28193	4.18217	15.9919	20.2009	15.6067	7.8614	8.54973	9.87378
ENSRNOG00000006721	AABR07049064.1	chr5:103024376-103090629	+	protein_coding	-0.927972	0.525597	0.0105902	0.0351503	0.174395	1.10237	1.49234	0.985697	0.999938	0	0	0.437125
ENSRNOG00000006723	Itga11	chr8:67615635-67683973	+	protein_coding	-1.41581	0.3748	0.000459715	0.00666471	0.57692	1.99273	3.66532	2.92845	2.43961	0.554193	0.517691	0.407093
ENSRNOG00000006726	Zfp9	chr4:150517027-150522351	-	protein_coding	-0.961484	0.513528	0.008659	0.031124	0.796796	1.75828	2.44557	2.52429	2.18825	0.358218	0.780646	1.16786
ENSRNOG00000006729	Slc24a4	chr6:126018841-126153867	+	protein_coding	-1.84935	0.277518	0.00353641	0.0183959	0.935301	2.78465	5.57381	5.62586	6.51154	0.738142	0.423269	1.82676
ENSRNOG00000006733	Srgap2	chr13:48068158-48286720	-	protein_coding	-0.716174	0.60871	0.00154295	0.0118974	3.75565	4.47182	20.3303	21.0838	22.1946	13.2443	10.986	13.4335
ENSRNOG00000006735	Cdkn2b	chr5:107845951-107858104	-	protein_coding	-1.50758	0.3517	0.0017418	0.0125732	2.02351	3.53109	10.4436	8.75861	12.8338	2.34918	3.38562	3.57551
ENSRNOG00000006740	Gatsl3	chr14:84447885-84452367	+	protein_coding	-1.829	0.281459	0.00566051	0.0241481	2.2569	4.08591	25.2989	13.6486	11.7117	3.18445	3.83327	4.39892
ENSRNOG00000006749	Tmtc3	chr7:40171963-40217056	-	protein_coding	-0.848538	0.555347	0.00779476	0.0292764	3.276	4.12454	15.6344	17.0794	16.6457	6.81108	8.99036	10.6474
ENSRNOG00000006756	Maged1	chrX:63803189-63809861	-	protein_coding	-1.48151	0.358115	0.000261391	0.00520741	3.75023	5.23174	35.6833	38.6897	35.4404	10.8028	12.2806	14.5451
ENSRNOG00000006766	Laptm4b	chr7:72924799-72968101	+	protein_coding	-0.930099	0.524822	0.0107857	0.0355525	3.2914	4.2215	18.8517	17.8988	16.3045	6.8493	8.49308	11.5947
ENSRNOG00000006779	Crot	chr4:22081604-22116265	+	protein_coding	-1.41626	0.374682	0.00443112	0.0209567	3.55152	4.96778	25.8179	38.0727	28.245	8.94955	9.79091	14.0134
ENSRNOG00000006783	Neb	chr3:37658563-37854561	-	protein_coding	-2.09331	0.234342	0.00170101	0.0124299	1.40725	3.50056	8.87603	8.9269	13.7886	1.00967	1.94131	2.15652
ENSRNOG00000006784	Sema4f	chr4:113738226-113764532	-	protein_coding	-1.8696	0.27365	0.00226105	0.0144393	1.46823	3.33783	9.35032	7.37088	10.9299	1.33939	1.39744	2.77654
ENSRNOG00000006792	Cep57	chr8:12335432-12355091	-	protein_coding	-0.938965	0.521607	0.00649105	0.0262293	2.30418	3.24315	9.68313	7.47961	8.37089	3.53044	3.36365	5.09389
ENSRNOG00000006803	Dnajc10	chr3:67538289-67578306	+	protein_coding	-0.941819	0.520576	0.0336243	0.0758693	4.06769	5.00951	25.1707	39.7123	30.3685	11.5164	16.3057	20.7679
ENSRNOG00000006806	Setmar	chr4:140092352-140105316	+	protein_coding	-0.868791	0.547606	0.000142648	0.00415738	0.734657	1.60345	1.94548	1.97513	2.20182	0.717092	0.72337	0.557004
ENSRNOG00000006813	Sumf1	chr4:140139003-140220487	-	protein_coding	-0.670308	0.628372	7.40347e-05	0.00348442	4.08698	4.75729	25.7997	27.4096	24.9815	16.0561	15.7059	16.2251
ENSRNOG00000006824	Hdac11	chr4:122781095-122798353	+	protein_coding	-0.746596	0.596008	0.0229893	0.0582097	1.2266	1.9732	3.19386	2.84715	2.75167	1.38267	1.95515	0.820079
ENSRNOG00000006827	Tmem198b	chr7:3224833-3229167	-	protein_coding	-0.932108	0.524092	0.0111825	0.036287	0.601848	1.53396	1.59992	1.47007	2.78122	0.380076	0.518321	0.668233
ENSRNOG00000006839	Arl5a	chr3:37924793-37947283	-	protein_coding	-0.809543	0.570562	0.0373434	0.0820246	2.64992	3.45947	10.9448	9.70371	9.41113	3.62362	7.56481	5.24338
ENSRNOG00000006867	Etv1	chr6:58467254-58558631	+	protein_coding	-1.58326	0.333726	0.00107341	0.00995571	0.527976	2.11124	2.90973	3.53535	3.54866	0.771506	0.169701	0.446747
ENSRNOG00000006878	Slc26a3	chr6:50725085-50766300	+	protein_coding	-1.38675	0.382425	0.000204317	0.004726	0.0492129	1.43596	1.43357	2.05264	1.66615	0.107755	0	0
ENSRNOG00000006893	Ppm1k	chr4:88694583-88718533	+	protein_coding	-0.879127	0.543696	0.00214362	0.013997	1.35605	2.23518	3.83358	3.1873	4.15657	1.26909	1.75823	1.6801
ENSRNOG00000006901	Cd320	chr7:18700344-18706244	+	protein_coding	-1.06021	0.479561	0.011988	0.0381074	3.0383	4.09852	18.0976	14.4284	16.062	5.25829	7.23042	9.76419
ENSRNOG00000006916	Sardh	chr3:5737200-5802129	-	protein_coding	-1.98017	0.25346	0.00050475	0.00687508	0.831501	2.81167	6.53163	4.48751	7.3739	0.644905	0.891575	0.811157
ENSRNOG00000006924	Tmem125	chr5:137370577-137372993	-	protein_coding	-0.8547	0.55298	0.00334052	0.0179332	1.1724	2.0271	3.30896	2.93501	2.99335	0.929399	1.24794	1.63984
ENSRNOG00000006932	Dock2	chr10:19465771-19574094	-	protein_coding	-1.39583	0.380027	0.00308815	0.0171678	1.39838	2.7942	5.17407	5.71438	7.05081	1.15764	1.52583	2.36106
ENSRNOG00000006952	Prex1	chr3:163329975-163477715	-	protein_coding	-1.03953	0.486485	0.0250898	0.0618233	3.13564	4.17517	17.5207	15.6024	18.1747	5.15719	7.90483	11.381
ENSRNOG00000006963	Ctse	chr13:48426820-48449490	+	protein_coding	-1.72377	0.302757	7.12123e-05	0.00341149	1.20407	2.92783	6.56982	7.19852	6.10028	1.3949	1.05945	1.47937
ENSRNOG00000006966	Nfia	chr5:116420690-116751416	+	protein_coding	-2.90116	0.133864	0.0070466	0.0274742	1.81193	4.71309	24.6349	24.9992	26.0737	1.1652	1.6028	6.68063
ENSRNOG00000006967	Xiap	chrX:128409472-128453000	+	protein_coding	-0.874189	0.545561	0.0313795	0.0722419	3.74188	4.61607	19.3727	25.1529	26.6795	8.74551	13.9265	15.4624
ENSRNOG00000006983	Nr2c1	chr7:35069814-35122796	+	protein_coding	-0.759482	0.590709	0.000132223	0.00403974	2.13941	2.89889	6.75139	6.34189	6.29073	3.42544	3.16847	3.63602
ENSRNOG00000006989	Vamp2	chr10:55675575-55679450	+	protein_coding	-0.780981	0.581971	0.000201688	0.00471567	5.10926	5.89024	61.6978	56.9869	56.3899	32.2099	32.753	35.6895
ENSRNOG00000006990	Grb7	chr10:86399827-86409348	+	protein_coding	-0.864021	0.549419	0.0011381	0.0102572	2.07033	2.93435	6.19598	7.04433	6.71615	2.95028	2.92738	3.77487
ENSRNOG00000006995	Ano6	chr7:137142170-137335208	+	protein_coding	-1.16089	0.447235	0.00145217	0.0115199	3.61215	4.77304	24.7679	27.0763	27.2534	12.9119	9.07316	12.048
ENSRNOG00000006997	App	chr11:24425005-24641858	-	protein_coding	-0.741441	0.598142	0.00474411	0.021792	7.81633	8.55777	361.343	362.136	405.676	191.669	232.815	253.195
ENSRNOG00000007014	Cnksr2	chrX:39711201-39951847	+	protein_coding	-0.666866	0.629873	0.000141353	0.00413869	0.0784461	0.745313	0.625129	0.637277	0.770412	0.019798	0.0769769	0.0718237
ENSRNOG00000007023	Galm	chr6:2808841-2860744	+	protein_coding	-1.723	0.302917	6.77151e-05	0.00339194	1.83144	3.55444	10.7276	11.6061	9.96966	2.33717	2.38853	2.98625
ENSRNOG00000007025	Evc2	chr14:78129749-78211931	-	protein_coding	-0.673153	0.627135	0.0122662	0.038587	0.512758	1.18591	1.07153	1.73525	1.07824	0.316432	0.390197	0.587056
ENSRNOG00000007030	Epha7	chr5:43603043-43757549	+	protein_coding	-0.634074	0.644354	0.00188643	0.0131076	0.767421	1.40149	1.54863	1.72003	1.65948	0.80569	0.518159	0.799241
ENSRNOG00000007033	Sorcs2	chr14:79538911-79912333	+	protein_coding	-0.845955	0.556343	0.00265317	0.0157893	3.05142	3.89738	14.4247	13.219	14.0867	6.68752	8.81831	6.54893
ENSRNOG00000007034	Hipk2	chr4:66445266-66624912	-	protein_coding	-1.62998	0.323093	0.00987635	0.0337322	3.21953	4.84951	25.785	27.4169	30.483	6.62178	6.05982	14.0202
ENSRNOG00000007046	Cfap70	chr15:4285052-4350714	+	protein_coding	-1.29578	0.407317	2.95155e-05	0.00273404	1.47533	2.77111	5.76061	5.62401	6.10324	1.63101	1.98322	1.73875
ENSRNOG00000007047	Eps8	chr4:171475567-171591882	-	protein_coding	-0.638307	0.642467	0.0275441	0.065819	3.31513	3.95344	18.5433	13.3258	12.28	9.04972	9.89833	8.00224
ENSRNOG00000007057	Csmd2	chr5:146383942-146739418	+	protein_coding	-1.50688	0.35187	5.42498e-05	0.00324866	0.296049	1.80293	2.35431	2.47963	2.63978	0.129686	0.21101	0.352863
ENSRNOG00000007059	Atp1b4	chrX:124631881-124652975	+	protein_coding	-1.13003	0.456907	0.000551193	0.00718263	0.129039	1.25907	1.46754	1.18309	1.54516	0.016629	0.039229	0.237828
ENSRNOG00000007069	Adhfe1	chr5:9403196-9429859	-	protein_coding	-2.14144	0.226654	1.12474e-05	0.00251647	0.624063	2.7655	5.29305	5.69359	6.46409	0.481867	0.606134	0.538133
ENSRNOG00000007088	Xpot	chr7:63690053-63728988	-	protein_coding	-0.71055	0.611087	0.00275747	0.0160858	4.29124	5.00179	30.0258	29.1007	34.2183	16.521	19.1948	20.2119
ENSRNOG00000007090	Cacna1c	chr4:150641066-150829913	-	protein_coding	-1.17718	0.442215	0.00201708	0.013587	1.4666	2.64378	5.68616	4.70929	5.39457	1.31605	1.74655	2.31845
ENSRNOG00000007100	Ccdc136	chr4:56674832-56704549	+	protein_coding	-0.968317	0.511102	0.00194712	0.0133006	1.36757	2.33589	3.65358	4.82662	3.74582	1.87974	1.53408	1.35431
ENSRNOG00000007102	Acss1	chr3:146420346-146470293	-	protein_coding	-0.907186	0.533224	0.0126139	0.0392309	2.54	3.44719	7.65089	10.402	12.1547	5.66795	4.81491	4.07358
ENSRNOG00000007127	Bbs5	chr3:55886695-55907716	+	protein_coding	-0.737679	0.599703	0.0269634	0.0649188	2.1491	2.88678	7.64615	5.28232	6.4487	2.50274	4.00391	3.97869
ENSRNOG00000007151	Cdk14	chr4:25825567-26419127	+	protein_coding	-0.964448	0.512475	0.00546708	0.0237337	4.30615	5.27059	38.6441	33.4503	41.1162	16.7675	16.7833	23.5019
ENSRNOG00000007172	Map4k3	chr6:3276738-3444519	-	protein_coding	-1.28254	0.411071	0.00260569	0.0156319	3.41954	4.70208	27.8145	23.4745	24.0078	9.28024	7.85049	12.4642
ENSRNOG00000007177	Kdelc2	chr8:57964988-57982600	+	protein_coding	-2.18743	0.219542	0.0401096	0.0866207	2.55982	4.74724	24.3549	27.6898	25.6318	1.16	7.89579	9.66857
ENSRNOG00000007206	LOC361016	chr15:17775692-17924302	+	protein_coding	-0.603052	0.65836	0.0497532	0.101226	0.512472	1.11552	1.62949	0.937582	0.996581	0.19118	0.764883	0.380751
ENSRNOG00000007221	Dut	chr3:117514444-117525446	+	protein_coding	-1.37754	0.384876	0.000820597	0.00862902	3.07793	4.45547	20.6835	23.1468	19.1696	8.70717	6.10835	7.72543
ENSRNOG00000007230	Kank3	chr7:18668692-18681939	+	protein_coding	-1.21683	0.430228	0.0303025	0.0704201	4.414	5.63082	55.575	43.588	47.2278	14.0767	17.6919	33.3778
ENSRNOG00000007249	Cdkn1b	chr4:168689163-168693964	+	protein_coding	-0.977267	0.507941	0.0343409	0.0769824	5.59677	6.57404	97.5338	89.4015	96.0933	32.8163	46.4246	69.6741
ENSRNOG00000007261	Gli2	chr13:34829139-35048444	-	protein_coding	-1.30637	0.404336	0.0197103	0.0524899	0.439354	1.74573	3.65129	2.79036	1.13941	0.445038	0.197298	0.441102
ENSRNOG00000007268	RGD1561796	chr10:11877903-11891099	+	protein_coding	-0.771871	0.585658	0.0140066	0.0417163	0.72121	1.49308	2.28831	1.34864	1.88799	0.509282	0.944898	0.526336
ENSRNOG00000007280	Naa60	chr10:11881739-11901785	-	protein_coding	-0.778748	0.582872	0.0165199	0.0465869	3.52763	4.30638	18.5762	18.1923	19.6154	8.15838	10.4868	13.5797
ENSRNOG00000007281	Flnc	chr4:56711049-56738791	+	protein_coding	-1.20802	0.432863	0.0389022	0.0846811	1.05882	2.26684	2.75078	6.99292	2.71818	1.59321	0.91296	0.822499
ENSRNOG00000007283	Erlec1	chr14:115314890-115352562	-	protein_coding	-0.619258	0.651006	0.00239187	0.0148839	5.21984	5.8391	52.6404	59.8747	56.4517	34.6968	40.2541	34.1471
ENSRNOG00000007286	Mdm1	chr7:61165640-61200879	+	protein_coding	-1.03795	0.487018	0.00249005	0.0152861	1.64822	2.68617	5.7859	4.86924	5.69369	1.59609	2.34411	2.54723
ENSRNOG00000007290	Atp1a2	chr13:90651686-90676629	-	protein_coding	-3.52933	0.0866096	0.000234703	0.0049639	0.87024	4.39957	16.3045	24.9099	19.9692	1.499	0.526225	0.601472
ENSRNOG00000007300	C1qtnf6	chr7:119746118-119753290	-	protein_coding	-1.56573	0.337806	0.000205392	0.00472629	0.818549	2.38428	4.3057	4.19422	4.16366	0.512086	0.801207	1.01411
ENSRNOG00000007302	Fbn1	chr3:117569697-117766120	-	protein_coding	-2.29647	0.203561	0.00069186	0.00797284	2.87668	5.17314	30.1543	48.7749	29.2891	7.05747	6.14741	5.87938
ENSRNOG00000007320	Fam3d	chr15:18322327-18355818	+	protein_coding	-0.814022	0.568794	0.00480952	0.0219745	1.40439	2.21841	4.00344	3.03634	3.99074	1.98492	1.65157	1.34343
ENSRNOG00000007323	Ric8b	chr7:25919867-26012344	+	protein_coding	-0.631661	0.645433	0.0286872	0.0676366	2.32844	2.9601	6.25131	6.64774	7.49747	3.03159	4.10857	5.152
ENSRNOG00000007326	Prepl	chr6:8318979-8346197	-	protein_coding	-1.22968	0.426413	0.00223191	0.0143179	3.25044	4.48012	21.1623	20.3793	22.4608	7.94867	7.03745	10.9829
ENSRNOG00000007330	Capzb	chr5:157642751-157742478	+	protein_coding	-1.51544	0.34979	0.000150892	0.00421193	5.56164	7.07708	132.103	140.758	129.469	40.6445	46.5642	52.1895
ENSRNOG00000007338	Fbln2	chr4:122835436-122895121	+	protein_coding	-1.47235	0.360394	0.000499065	0.00684063	0.752952	2.22531	3.98597	3.35505	3.70879	0.685658	0.972271	0.439617
ENSRNOG00000007345	Amot	chrX:116751230-116792864	-	protein_coding	-1.85441	0.276546	0.00282649	0.0162987	1.28858	3.14298	7.89581	6.86521	8.85149	0.836851	1.29383	2.45993
ENSRNOG00000007351	Ggh	chr5:34040258-34063361	+	protein_coding	-0.686348	0.621425	0.0163006	0.0460668	3.44261	4.12896	16.7831	15.368	17.3999	9.83675	12.2707	7.93705
ENSRNOG00000007367	Sept4	chr10:74861714-74884196	+	protein_coding	-3.06708	0.119321	0.000345744	0.00588089	2.90679	5.97387	63.4444	59.1388	63.0617	6.93359	4.30005	9.03099
ENSRNOG00000007369	Shisa4	chr13:52193989-52197205	-	protein_coding	-1.51754	0.34928	0.000186744	0.00458065	2.22306	3.74061	11.9962	14.2601	11.0429	3.95411	3.35348	3.71873
ENSRNOG00000007370	Rnf144a	chr6:45509787-45629168	-	protein_coding	-3.04527	0.121138	0.000676501	0.00790797	0.88689	3.93216	13.8862	11.7427	17.7521	0.745922	0.372429	1.63892
ENSRNOG00000007377	Slit3	chr10:20320878-20518518	+	protein_coding	-1.29797	0.406697	0.00267282	0.0158204	3.07141	4.36938	17.8268	21.4899	19.8537	9.13088	5.62358	7.85156
ENSRNOG00000007387	Per1	chr10:55687050-55695994	+	protein_coding	-0.616629	0.652193	0.0115104	0.0370519	4.89896	5.51559	48.6078	40.8257	45.1404	29.4349	24.6067	33.0782
ENSRNOG00000007395	Baat	chr5:64768401-64777368	-	protein_coding	-0.897731	0.53673	0.0169903	0.0474137	0.443748	1.34148	1.83496	0.987226	1.88856	0.294017	0.17736	0.651562
ENSRNOG00000007405	Krba1	chr4:78024765-78046066	+	protein_coding	-1.50454	0.352443	0.000774362	0.00840229	1.2323	2.73684	6.88484	5.09465	5.16415	1.32528	1.07082	1.69318
ENSRNOG00000007415	Ptgs1	chr3:15560712-15582344	+	protein_coding	-1.03992	0.486353	0.045029	0.0944006	2.82598	3.8659	14.1283	14.5579	12.1679	4.53627	4.56464	10.5733
ENSRNOG00000007418	Ipo9	chr13:52207435-52256196	-	protein_coding	-0.641135	0.641208	0.0243748	0.06072	3.71617	4.35731	20.5466	18.3579	19.6444	10.4396	10.8338	15.7688
ENSRNOG00000007422	Vav2	chr3:5811504-5976244	-	protein_coding	-1.10644	0.464439	0.00275289	0.0160784	1.58868	2.69512	5.51892	5.04462	5.8927	1.58759	1.82149	2.72688
ENSRNOG00000007426	Tmem64	chr5:28850950-28867227	+	protein_coding	-1.79182	0.288808	0.000732667	0.00819262	0.918351	2.71017	5.09194	5.65398	5.91339	0.468247	1.21549	1.07532
ENSRNOG00000007439	Unc13d	chr10:104613928-104628676	-	protein_coding	-1.28179	0.411284	0.00457248	0.0213956	2.85878	4.14057	17.4606	15.1306	17.4252	5.08314	5.44222	8.74028
ENSRNOG00000007445	Asph	chr5:22577675-22799349	-	protein_coding	-0.998495	0.500522	0.0180921	0.0494761	1.68684	2.68534	6.21919	3.53743	7.1246	2.24413	2.08954	2.32948
ENSRNOG00000007446	Apip	chr3:92969141-92995483	+	protein_coding	-0.936939	0.52234	0.0462351	0.0961529	1.97835	2.91529	6.15733	7.50965	6.04867	1.55065	3.6552	4.15277
ENSRNOG00000007454	Aloxe3	chr10:55712043-55735911	+	protein_coding	-1.02732	0.490621	0.00463176	0.0215337	0.161396	1.18871	1.48998	0.785273	1.66449	0.143102	0.088978	0.123702
ENSRNOG00000007459	Pcnx1	chr6:105611456-105743404	+	protein_coding	-0.868072	0.547878	0.00347727	0.0182564	4.05407	4.92214	31.2042	25.4866	31.6737	13.5879	15.9473	17.5394
ENSRNOG00000007462	Sept8	chr10:38877422-38906482	+	protein_coding	-1.04466	0.484761	0.00203476	0.0136555	3.23442	4.27908	22.0101	17.0427	16.6267	7.43208	8.97334	8.91283
ENSRNOG00000007475	Gpihbp1	chr7:116632506-116634293	+	protein_coding	-2.79826	0.143761	0.0003685	0.00609028	1.38418	4.18244	18.8914	15.3671	17.386	0.970378	1.59124	2.48325
ENSRNOG00000007478	Cry2	chr3:81314149-81344110	-	protein_coding	-0.755639	0.592284	0.0119973	0.0381251	3.74295	4.49859	23.5437	20.9552	20.4366	13.8756	9.69369	14.0876
ENSRNOG00000007486	Atg7	chr4:146598413-146777124	+	protein_coding	-0.652648	0.636112	0.00466233	0.0215742	2.0082	2.66085	5.19046	6.17458	4.69465	3.16427	2.70368	3.22099
ENSRNOG00000007489	Zfp41	chr7:116653664-116661942	+	protein_coding	-1.27781	0.41242	0.00485964	0.022134	0.74886	2.02667	2.72581	3.03658	3.49816	0.294424	1.1544	0.701709
ENSRNOG00000007523	Cct6b	chr10:70069491-70118194	-	protein_coding	-1.06163	0.479092	0.0031128	0.0172587	1.22513	2.28675	4.13715	3.23713	4.33764	1.16967	1.80049	1.10267
ENSRNOG00000007561	Glb1l2	chr8:27807301-27852996	-	protein_coding	-0.971491	0.509979	0.00200094	0.0135285	0.3428	1.31429	1.54546	1.63382	1.29388	0.103663	0.252044	0.476125
ENSRNOG00000007564	Evc	chr14:78213635-78253266	+	protein_coding	-1.77795	0.291598	0.00269952	0.0159107	0.395896	2.17384	2.99069	5.32489	2.63977	0.162517	0.306051	0.500272
ENSRNOG00000007567	Rem1	chr3:148108539-148116991	+	protein_coding	-1.03759	0.48714	0.0420292	0.0896628	0.906671	1.94426	3.28441	2.84611	2.45884	0.305431	0.728301	1.92033
ENSRNOG00000007583	Pygb	chr3:146582752-146634535	+	protein_coding	-1.46384	0.362527	0.00423706	0.0203903	2.74145	4.20529	15.7231	18.8085	17.9489	3.9263	5.97611	7.70241
ENSRNOG00000007584	Ehd4	chr3:111877853-111941841	-	protein_coding	-1.26138	0.417145	0.00207651	0.0137539	4.08942	5.3508	36.8055	37.8816	45.2336	12.8458	17.1403	18.6407
ENSRNOG00000007587	Tcp11l2	chr7:24859050-24885775	-	protein_coding	-1.10577	0.464653	0.005624	0.0240771	4.21342	5.3192	36.0314	42.1681	38.8091	15.8131	14.6921	23.1977
ENSRNOG00000007606	Rnf43	chr10:74959285-75028951	+	protein_coding	-0.718079	0.607907	0.00130607	0.0109684	1.28305	2.00113	3.2929	2.97112	2.76302	1.49467	1.21488	1.60824
ENSRNOG00000007610	Gdf11	chr7:3306863-3315856	-	protein_coding	-0.759206	0.590822	0.00291558	0.0166345	0.624974	1.38418	1.79921	1.28974	1.7747	0.517164	0.687123	0.432941
ENSRNOG00000007613	C1qtnf5	chr8:48443767-48445637	+	protein_coding	-2.24354	0.211168	0.00134208	0.0111023	1.79916	4.0427	13.2793	18.9842	14.6866	3.02856	3.19868	1.49196
ENSRNOG00000007628	Ptp4a3	chr7:114997103-115002902	+	protein_coding	-1.75238	0.296812	0.0247083	0.0611943	2.14841	3.90079	16.4004	11.1972	14.7016	2.55509	1.89042	7.48001
ENSRNOG00000007646	Sipa1l1	chr6:106039991-106163302	+	protein_coding	-1.37181	0.386406	0.000933747	0.00920643	2.64711	4.01891	14.3109	13.8816	17.6979	4.32498	5.7526	5.83574
ENSRNOG00000007649	Dnm2	chr8:22458899-22540524	+	protein_coding	-0.807466	0.571384	0.00123747	0.010704	4.65168	5.45915	39.7719	42.0101	47.548	24.5743	22.0699	25.9177
ENSRNOG00000007654	Lrig3	chr7:69213147-69263142	+	protein_coding	-0.598997	0.660213	0.00742473	0.0283332	1.63134	2.23033	3.28529	4.01725	3.80559	1.80955	2.53228	1.99607
ENSRNOG00000007655	Zfp174	chr10:11928139-11935382	-	protein_coding	-0.588759	0.664915	0.0256439	0.0627527	0.964203	1.55296	2.31438	2.04849	1.50021	0.735686	0.868458	1.28985
ENSRNOG00000007660	Fntb	chr6:99883959-99966988	+	protein_coding	-2.00481	0.249168	0.00880998	0.0314592	1.78133	3.78614	12.8248	9.89972	16.424	1.12647	2.71829	4.13685
ENSRNOG00000007666	Cacnb4	chr3:37955069-38090526	-	protein_coding	-0.903836	0.534464	0.00229599	0.0145258	0.0747074	0.978543	1.23014	1.03786	0.683473	0.014498	0.016147	0.133078
ENSRNOG00000007681	Brd3	chr3:5997315-6054483	-	protein_coding	-0.846796	0.556018	0.0175208	0.0484512	3.53326	4.38005	22.0866	15.7411	22.3581	8.61348	10.7391	12.751
ENSRNOG00000007682	Gria3	chrX:127562660-127829753	+	protein_coding	-1.19159	0.437821	0.0333341	0.07544	2.49936	3.69095	11.3865	13.0857	11.3461	7.57677	4.9329	2.55269
ENSRNOG00000007688	Sms	chrX:40363646-40415109	+	protein_coding	-0.709356	0.611593	0.035016	0.078105	2.53875	3.2481	10.2742	7.51835	7.93079	3.56677	6.15782	5.00244
ENSRNOG00000007710	Usp20	chr3:9822586-9856057	+	protein_coding	-0.769433	0.586648	0.00402621	0.0198237	2.54977	3.31921	9.07108	9.64086	8.27877	4.87929	4.08348	5.71722
ENSRNOG00000007744	Ehd3	chr6:25074955-25100977	+	protein_coding	-2.75404	0.148235	6.97007e-05	0.00339194	2.6971	5.45114	42.1239	36.4004	50.9132	5.13588	6.3052	5.08439
ENSRNOG00000007763	Plod1	chr5:164720587-164747083	-	protein_coding	-1.12528	0.458413	0.0160782	0.0456423	3.57835	4.70363	24.8655	26.935	23.4867	9.00637	8.7348	16.4971
ENSRNOG00000007788	Glod4	chr10:64379921-64398294	-	protein_coding	-0.945675	0.519187	0.0260529	0.0634512	4.43943	5.38511	30.3824	47.2364	47.2141	17.2099	26.6289	19.3018
ENSRNOG00000007799	Fam151a	chr5:126334803-126347770	+	protein_coding	-1.31562	0.401752	0.008059	0.0298376	0.160014	1.47564	1.57371	2.81259	1.19207	0.327703	0.050525	0
ENSRNOG00000007811	Klrb1c	chr4:162541751-162553705	+	protein_coding	-0.873833	0.545695	0.00594439	0.024856	0.832861	1.70669	2.05583	2.00861	2.7827	0.81764	0.520253	1.04515
ENSRNOG00000007822	Vgll4	chr4:146779276-146839397	-	protein_coding	-1.49631	0.354459	0.000186029	0.00457769	2.08115	3.57746	11.3777	10.5136	10.9375	3.47589	2.64549	3.64332
ENSRNOG00000007827	Cox4i2	chr3:148234193-148245416	+	protein_coding	-1.85611	0.27622	0.00323239	0.0176032	2.53988	4.39599	16.1507	28.1477	17.6675	3.71568	6.16317	4.82221
ENSRNOG00000007829	Lactb2	chr5:4982348-5005109	+	protein_coding	-0.819984	0.566448	0.00105914	0.00989919	3.11632	3.9363	14.0502	13.745	15.1677	7.46259	6.91617	8.73414
ENSRNOG00000007837	Acot11	chr5:126347435-126395668	-	protein_coding	-1.3116	0.402873	0.000401631	0.00629896	0.420671	1.73227	2.14791	2.89227	1.99345	0.347134	0.285224	0.385205
ENSRNOG00000007839	Slc16a7	chr7:68446193-68549763	-	protein_coding	-1.32057	0.400376	9.96432e-05	0.00377923	0.602094	1.92267	2.71305	2.7744	2.88832	0.701749	0.42497	0.44226
ENSRNOG00000007849	Zmat5	chr14:84953786-84969116	+	protein_coding	-0.920511	0.528322	0.0262389	0.0637155	2.47666	3.39717	10.337	8.72684	9.60423	4.05154	3.3275	6.8883
ENSRNOG00000007859	Cep83	chr7:35773928-35847617	+	protein_coding	-0.771562	0.585783	0.0278574	0.0663561	4.00031	4.77187	27.5372	22.1233	29.9007	12.6628	13.4021	19.8293
ENSRNOG00000007862	Acat1	chr8:58166990-58195884	-	protein_coding	-0.823075	0.565236	0.0168294	0.0471261	4.35104	5.17412	32.3443	42.6685	31.3223	15.9275	23.6392	19.378
ENSRNOG00000007869	Wscd1	chr10:58332588-58371196	+	protein_coding	-1.88959	0.269884	0.00135948	0.0111266	0.683054	2.57264	5.48232	4.17741	5.27315	0.210811	0.699532	1.01119
ENSRNOG00000007879	Stk26	chrX:138046494-138096669	+	protein_coding	-1.34577	0.393445	0.000567595	0.00728367	1.20621	2.55198	4.22939	5.54508	4.89248	1.34603	1.56924	1.03787
ENSRNOG00000007882	Ablim2	chr14:80045078-80169472	-	protein_coding	-0.997662	0.500811	0.000677159	0.00790797	0.303123	1.30079	1.39164	1.73132	1.28907	0.169069	0.179661	0.361915
ENSRNOG00000007894	Mpdz	chr5:99413187-99566318	-	protein_coding	-1.4642	0.362436	0.0156337	0.0448531	2.17067	3.63488	10.9614	11.3438	11.9834	2.28627	2.76271	6.38091
ENSRNOG00000007906	Bub1b	chr3:110367939-110420458	+	protein_coding	-0.738906	0.599194	0.0125797	0.0391498	0.586514	1.32542	1.2155	2.04037	1.33655	0.391484	0.416079	0.71834
ENSRNOG00000007916	Ptk2	chr7:114437361-114590119	-	protein_coding	-0.603142	0.658318	0.00484725	0.0220914	4.66531	5.26845	36.1835	36.3446	40.2391	21.2754	25.6217	26.5508
ENSRNOG00000007920	Ssbp3	chr5:126511350-126648661	+	protein_coding	-1.83371	0.280542	0.00606623	0.0251557	1.97947	3.81318	13.0533	13.7998	12.354	1.62005	2.9208	4.96969
ENSRNOG00000007926	Map2k5	chr8:68055972-68282590	-	protein_coding	-0.680266	0.62405	0.0259088	0.063199	2.66172	3.34198	8.97355	8.37503	10.1504	6.56773	3.95423	5.75816
ENSRNOG00000007939	Naprt	chr7:116922944-116926555	-	protein_coding	-1.09317	0.46873	0.00784808	0.0294086	1.75142	2.84459	6.53208	7.03888	5.12082	2.32686	1.70619	3.23932
ENSRNOG00000007947	Fam13a	chr4:89183768-89281222	-	protein_coding	-1.72304	0.302909	0.00456293	0.0213578	2.19672	3.91976	14.417	10.1855	19.1021	4.62912	3.61778	2.70647
ENSRNOG00000007949	Rgn	chrX:1833492-1848904	-	protein_coding	-0.962428	0.513192	0.00269579	0.0158981	0.39755	1.35998	1.63727	1.55964	1.50524	0.459808	0.079343	0.45067
ENSRNOG00000007951	Galnt14	chr6:24770317-24985716	-	protein_coding	-0.720906	0.606716	0.0103459	0.0346682	0.12878	0.849686	0.539484	1.2243	0.709125	0.08695	0.104573	0.08867
ENSRNOG00000007964	Tp53inp1	chr5:24410863-24416888	+	protein_coding	-1.08785	0.470461	0.00315826	0.017373	3.04934	4.13719	16.28	16.8167	16.6965	7.4574	5.67657	9.04701
ENSRNOG00000007971	Wbp2	chr10:104630573-104637823	-	protein_coding	-0.708384	0.612005	0.0279848	0.0665766	5.54219	6.25058	71.589	78.7049	75.2921	35.5427	45.1703	58.9704
ENSRNOG00000007972	Rbbp9	chr3:138701586-138708332	-	protein_coding	-0.649328	0.637577	0.0110073	0.0359222	1.44292	2.09224	4.03333	3.00679	2.84443	1.43728	1.8225	1.92108
ENSRNOG00000007975	Ncoa2	chr5:5616483-5694598	+	protein_coding	-1.17678	0.442337	0.0139462	0.0415955	2.46311	3.63989	10.5713	10.6933	13.3164	3.20745	4.10439	6.80636
ENSRNOG00000007981	Klhl23	chr3:56056925-56070614	+	protein_coding	-2.22605	0.213743	0.00516826	0.0228804	1.68958	3.91564	12.491	12.7909	17.4729	1.0713	2.18912	4.0808
ENSRNOG00000007990	Adipor2	chr4:151414684-151428894	-	protein_coding	-0.8051	0.572322	0.00568542	0.0242116	4.63233	5.43743	38.5611	43.4372	45.2884	19.8528	24.6462	27.5247
ENSRNOG00000007993	Sh3tc1	chr14:80195715-80229214	+	protein_coding	-1.72175	0.30318	0.00631154	0.0257936	2.65521	4.37697	20.4213	18.612	20.3515	4.07985	3.97558	8.89017
ENSRNOG00000008001	Rab3b	chr5:128501847-128568188	+	protein_coding	-1.52372	0.347788	0.0220828	0.0567247	1.10496	2.62868	7.7816	6.43639	2.62242	1.62036	1.05206	0.850664
ENSRNOG00000008017	Cdk5	chr4:7282948-7288383	+	protein_coding	-1.27642	0.412818	0.00890512	0.0316798	2.0339	3.31033	10.2546	8.47085	8.15807	2.14358	2.83668	4.694
ENSRNOG00000008025	Bend5	chr5:131257127-131312335	+	protein_coding	-0.627193	0.647435	0.0444625	0.0936042	1.4053	2.03249	3.16139	3.95868	2.3183	2.16864	1.56113	1.28984
ENSRNOG00000008030	Shc2	chr7:12948952-12971174	+	protein_coding	-1.24837	0.420922	0.0014575	0.0115324	0.207906	1.45628	2.09355	1.35474	1.83631	0.076371	0.064063	0.34533
ENSRNOG00000008034	Tmeff1	chr5:64326733-64412523	+	protein_coding	-1.03281	0.488757	0.000635558	0.00770243	1.86882	2.90163	5.9855	6.73069	6.72708	2.251	2.67122	3.08209
ENSRNOG00000008040	Fam64a	chr10:58613674-58618514	+	protein_coding	-0.876421	0.544717	0.0454718	0.0950548	0.578343	1.45476	1.35221	2.6196	1.41906	0.208094	0.350383	1.04051
ENSRNOG00000008051	Itpk1	chr6:126450139-126582134	-	protein_coding	-0.811076	0.569956	0.00304646	0.0170196	2.1178	2.92888	6.11612	7.29836	6.47837	2.74864	3.80671	3.53781
ENSRNOG00000008057	Krt7	chr7:143059764-143075907	+	protein_coding	-1.46784	0.361523	0.00330861	0.0178229	5.66289	7.13073	139.936	157.037	122.57	63.6048	50.6095	38.0034
ENSRNOG00000008061	Nuak1	chr7:25039335-25113664	+	protein_coding	-1.26402	0.416381	0.0321856	0.0735621	1.17823	2.44226	4.73437	5.23426	3.49062	1.73448	2.09316	0.370162
ENSRNOG00000008063	Hibadh	chr4:82604373-82702429	-	protein_coding	-1.50017	0.353512	0.00577492	0.0244426	3.66645	5.16662	32.6406	36.1248	36.1019	8.33674	11.1836	16.9957
ENSRNOG00000008065	Wwc1	chr10:20663541-20818128	-	protein_coding	-1.104	0.465223	0.000770212	0.00839117	4.18313	5.28713	38.1242	37.2301	38.8021	14.4312	18.3622	19.0626
ENSRNOG00000008067	Rcor1	chr6:135513650-135548201	+	protein_coding	-0.912405	0.531299	0.0177432	0.0488063	2.80539	3.7178	11.1454	11.3141	14.2296	4.51068	5.81325	8.09833
ENSRNOG00000008079	Ugp2	chr14:106208176-106248539	-	protein_coding	-0.817144	0.567564	0.0273821	0.0655542	4.24374	5.06088	29.3258	35.3336	32.7527	13.3367	18.1199	23.805
ENSRNOG00000008082	Rgs6	chr6:106496992-106602139	+	protein_coding	-0.902052	0.535125	0.00127581	0.0108612	1.5182	2.42025	4.41817	4.21554	4.42691	1.49754	2.2512	1.8941
ENSRNOG00000008088	Btbd3	chr3:131351587-131357929	+	protein_coding	-1.31291	0.402508	0.0131208	0.0401129	0.634434	1.94734	2.7084	2.59493	3.30279	0.049901	0.681258	1.11918
ENSRNOG00000008113	RGD1561149	chr5:147403948-147412705	-	protein_coding	-0.613001	0.653835	0.00463456	0.0215337	3.33054	3.94354	14.9206	15.5099	12.8568	8.22235	9.0081	10.0301
ENSRNOG00000008117	Galnt11	chr4:6297255-6330765	-	protein_coding	-0.891915	0.538898	0.00529622	0.0232627	3.7436	4.63551	25.3602	22.6401	23.6424	10.5566	11.5907	15.5167
ENSRNOG00000008118	Sync	chr5:147476221-147498902	+	protein_coding	-0.742424	0.597734	0.0374498	0.0821851	0.24693	0.989354	0.482659	1.41044	1.18946	0.085269	0.110534	0.386534
ENSRNOG00000008133	Mfng	chr7:119978983-119996824	-	protein_coding	-0.976872	0.50808	0.00595994	0.024892	2.42647	3.40335	9.86336	7.85832	11.3087	3.55894	4.71547	4.96222
ENSRNOG00000008138	RGD1309108	chr8:45084320-45137893	-	protein_coding	-1.22918	0.42656	0.000655351	0.00779376	0.705571	1.93475	2.99696	2.49589	2.99914	0.527122	0.495051	0.899609
ENSRNOG00000008146	Tox2	chr3:159569363-159694756	+	protein_coding	-1.24699	0.421327	0.000439482	0.00656874	0.855636	2.10262	3.37474	2.71642	3.87282	0.740626	0.839194	0.850901
ENSRNOG00000008151	Plscr4	chr8:99880073-99918825	+	protein_coding	-2.13928	0.226993	0.000732903	0.00819262	1.56745	3.70673	12.5063	11.7716	11.9043	1.29786	2.95768	1.86277
ENSRNOG00000008159	Msantd3	chr5:64282351-64306860	+	protein_coding	-0.59807	0.660637	0.00023001	0.00492642	1.85076	2.44883	4.35715	4.34791	4.6806	2.57473	2.46391	2.78959
ENSRNOG00000008168	Wnt5b	chr4:151500957-151516894	-	protein_coding	-2.66022	0.158195	5.88636e-05	0.00331589	0.4516	3.11182	8.51871	6.80118	7.69995	0.155379	0.440667	0.536551
ENSRNOG00000008174	Appl2	chr7:26256459-26306126	+	protein_coding	-1.62231	0.324814	0.0137849	0.0413007	2.10449	3.72681	12.192	9.75676	15.355	1.92635	3.07377	5.67149
ENSRNOG00000008178	Nxn	chr10:64412833-64550145	-	protein_coding	-0.632123	0.645226	0.0306154	0.0709559	3.51245	4.14458	15.7933	16.1948	18.1598	7.95608	11.0293	12.7943
ENSRNOG00000008182	Htra3	chr14:80248140-80276534	+	protein_coding	-2.31773	0.200583	0.000875335	0.00890766	1.70112	4.01884	16.4541	16.225	13.1685	2.91636	2.7682	1.32941
ENSRNOG00000008190	Pnpla7	chr3:2182957-2261878	+	protein_coding	-0.734204	0.60115	0.0175565	0.0485222	2.95529	3.6895	13.9867	10.8283	11.1149	5.87273	6.07569	8.59397
ENSRNOG00000008193	Cr1l	chr13:113824892-113872097	-	protein_coding	-0.96777	0.511296	0.000654968	0.00779376	5.383	6.35077	86.8137	72.0666	83.7289	39.4812	38.6432	44.2801
ENSRNOG00000008218	Atp6v0e2	chr4:78168117-78171265	+	protein_coding	-0.709607	0.611487	0.0200194	0.0530895	1.58462	2.29423	3.7949	4.1955	3.7368	2.67877	1.36877	2.0962
ENSRNOG00000008223	Cnr1	chr5:49311030-49333056	+	protein_coding	-0.745445	0.596484	0.00969135	0.0332958	2.35341	3.09886	7.01506	6.77636	9.08935	4.44085	3.40222	4.57191
ENSRNOG00000008236	Decr1	chr5:29573898-29601748	-	protein_coding	-0.912771	0.531164	0.00035571	0.00598359	4.33749	5.25026	37.8111	36.779	36.6055	21.3412	19.044	17.4523
ENSRNOG00000008237	Unc13b	chr5:58505500-58715576	+	protein_coding	-1.14914	0.450895	0.0103605	0.0347091	2.5298	3.67894	11.003	11.49	13.014	3.44803	4.47125	6.91378
ENSRNOG00000008243	Slc43a1	chr3:72238981-72264466	+	protein_coding	-1.44229	0.367982	0.00154932	0.011909	1.27914	2.72144	5.91569	4.79929	6.15309	1.05333	1.31384	2.00878
ENSRNOG00000008244	LOC690035	chr6:93563446-93667675	+	protein_coding	-0.911974	0.531457	0.00066368	0.00782399	1.40844	2.32042	4.30988	3.71457	3.97759	1.37212	1.7921	1.82413
ENSRNOG00000008247	Ikbip	chr7:31784438-31803194	+	protein_coding	-2.1948	0.218424	0.018475	0.0502491	0.807011	3.00181	10.3828	11.193	2.70293	0.565101	0.642555	1.08325
ENSRNOG00000008257	Mfap2	chr5:159534202-159539750	+	protein_coding	-1.88989	0.269828	0.00680557	0.0268887	1.24512	3.13501	7.083	7.64038	8.70707	2.55951	1.48388	0.506386
ENSRNOG00000008258	Fnbp1	chr3:9861237-9936617	-	protein_coding	-0.615694	0.652616	0.00674168	0.0267734	4.11867	4.73436	23.6532	28.5356	24.902	14.5033	16.5527	18.2644
ENSRNOG00000008270	Cntrob	chr10:55901901-55924158	-	protein_coding	-0.638553	0.642357	0.00431475	0.0206548	0.506893	1.14545	1.39801	1.05825	1.19327	0.48299	0.258364	0.537537
ENSRNOG00000008274	Xpc	chr4:123134457-123161985	-	protein_coding	-0.676788	0.625556	0.012382	0.0388004	3.68217	4.35896	17.2713	19.7311	21.8106	12.6363	9.80651	13.3532
ENSRNOG00000008282	Elf5	chr3:93351619-93371656	+	protein_coding	-1.45983	0.363535	0.00226084	0.0144393	1.81347	3.27331	8.53744	9.31012	8.19169	2.32044	1.84314	3.59978
ENSRNOG00000008291	Thumpd2	chr6:3743074-3794501	-	protein_coding	-0.670427	0.628321	0.0138937	0.0415224	2.10456	2.77499	6.28124	5.75511	5.51967	3.07631	2.69692	4.27838
ENSRNOG00000008300	Zbtb8a	chr5:147554918-147584038	-	protein_coding	-1.45953	0.363612	0.000160865	0.00427904	0.998971	2.4585	4.8313	4.31603	4.35665	0.747693	1.12292	1.1516
ENSRNOG00000008323	Pitpnm3	chr10:58618645-58693754	-	protein_coding	-1.96782	0.255639	0.000783681	0.00844853	1.80278	3.7706	13.7461	11.9483	12.3136	2.10612	1.947	3.63953
ENSRNOG00000008332	Smo	chr4:57019941-57042770	+	protein_coding	-1.35833	0.390035	0.00216403	0.0140812	0.885632	2.24396	3.72144	4.30317	3.24508	0.53336	1.29647	0.79102
ENSRNOG00000008334	Crocc	chr5:159540421-159583049	-	protein_coding	-0.752369	0.593628	0.00212567	0.0139376	0.503927	1.2563	1.57383	1.30515	1.29757	0.379827	0.290542	0.601381
ENSRNOG00000008351	RGD1308117	chr15:51834703-51839341	-	protein_coding	-0.823039	0.56525	0.022948	0.0581427	3.54138	4.36442	21.7841	17.9016	19.2923	14.5962	8.54624	9.60065
ENSRNOG00000008356	Myo5c	chr8:82171497-82247544	+	protein_coding	-1.85954	0.275565	0.00165654	0.0122476	3.03838	4.89792	30.1171	28.9584	27.4277	5.90873	5.9694	10.517
ENSRNOG00000008364	Cat	chr3:93379874-93412058	-	protein_coding	-2.03324	0.244305	0.00946089	0.0328612	4.21048	6.24372	67.4009	82.7156	74.9927	11.6279	14.1729	32.1159
ENSRNOG00000008372	Vamp7	chr12:18996591-19030381	+	protein_coding	-1.07006	0.4763	0.00905544	0.0320134	3.58786	4.65792	21.9615	25.5057	25.4354	8.03408	11.8815	13.9387
ENSRNOG00000008374	Nipsnap1	chr14:85113578-85137454	+	protein_coding	-0.870419	0.546988	0.0295557	0.06916	1.47892	2.34934	2.72149	5.77264	4.25037	1.59143	1.69026	2.10644
ENSRNOG00000008377	Wdtc1	chr5:151487577-151536518	-	protein_coding	-1.00424	0.498534	0.00759076	0.0287705	3.12965	4.13389	16.8424	16.9588	15.8867	6.33798	6.94591	10.4984
ENSRNOG00000008401	Card10	chr7:119999472-120027026	-	protein_coding	-2.00214	0.24963	0.0129407	0.0398388	1.5761	3.57824	11.3295	9.92919	11.6455	0.683044	2.07302	4.12506
ENSRNOG00000008409	Myo1f	chr7:18440742-18491448	+	protein_coding	-1.07263	0.475451	0.0178385	0.0490037	3.23594	4.30857	21.8457	18.4491	16.5115	7.02567	6.79204	12.3725
[truncated: 2,895 more rows]
