# Supplementary figures and images for: Candidate Genes as Biomarkers in Lipopolysaccharide-Induced Acute Respiratory Distress Syndrome Based on mRNA Expression Profile by Next-Generation RNA-Seq Analysis
Source: Hindawi journal article supplement (doi:10.1155/2018/4384797), 2018-01-01

# Sig GO terms of DE gene-CC

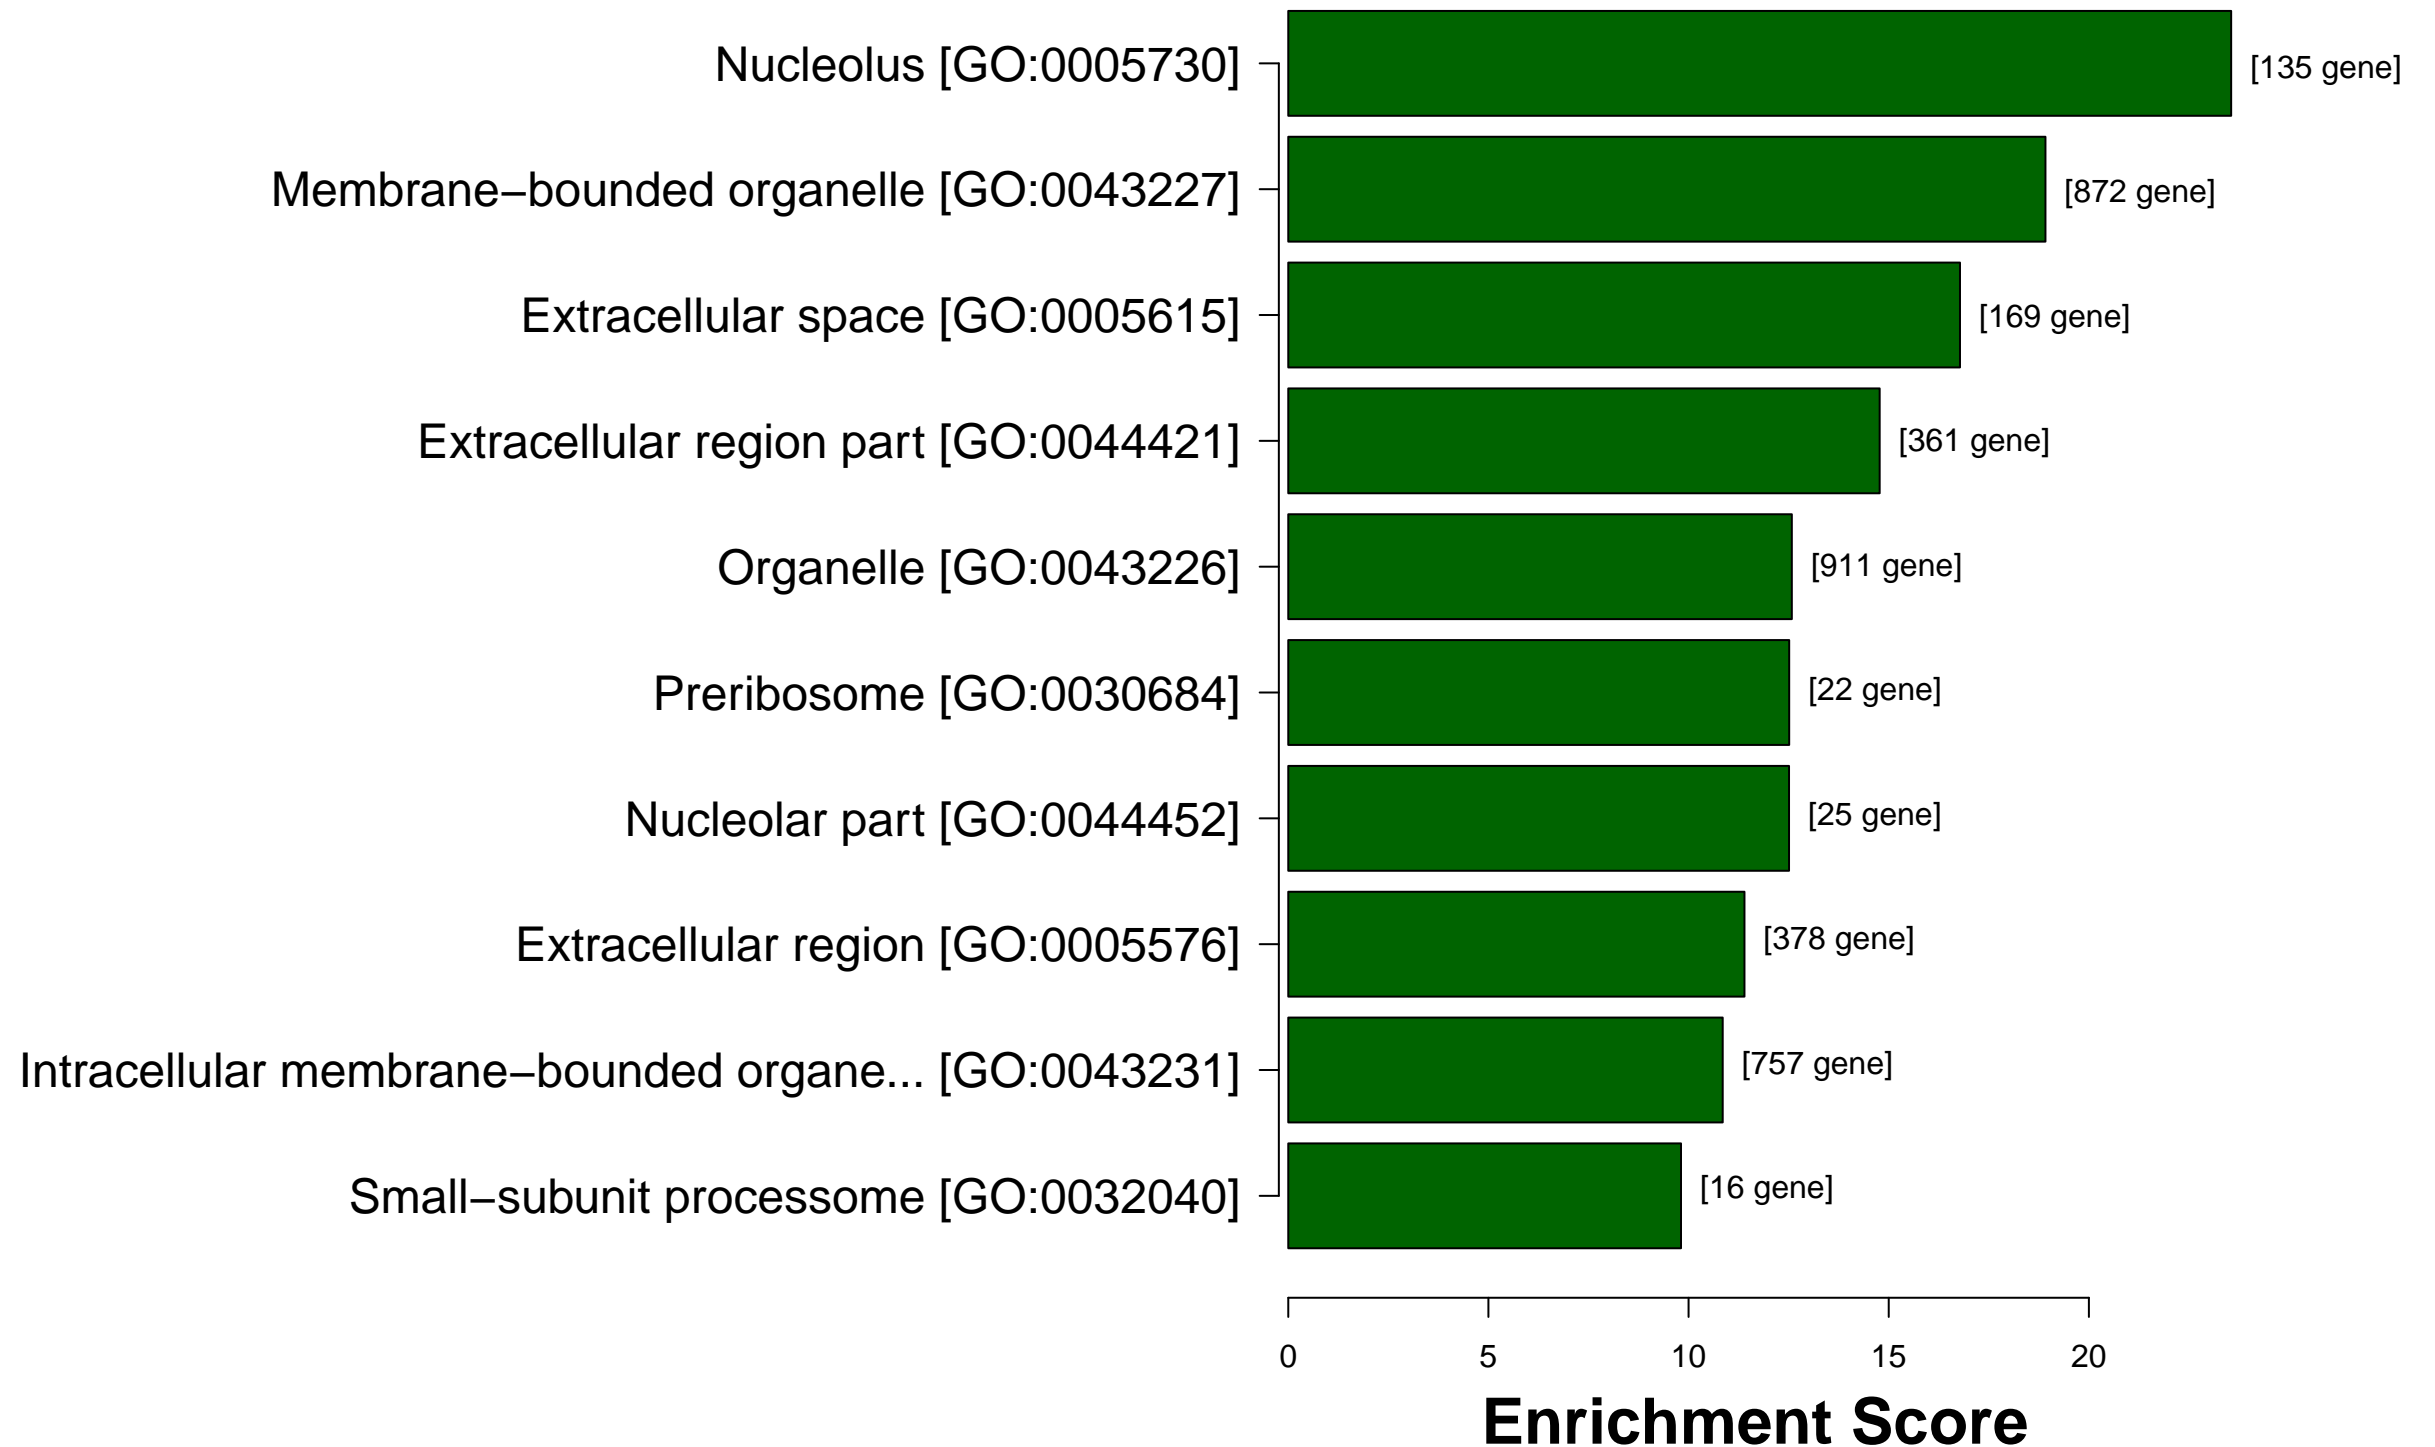

Supplement: f1 [file 4384797.f1.zip]

# Sig GO terms of DE gene–BP

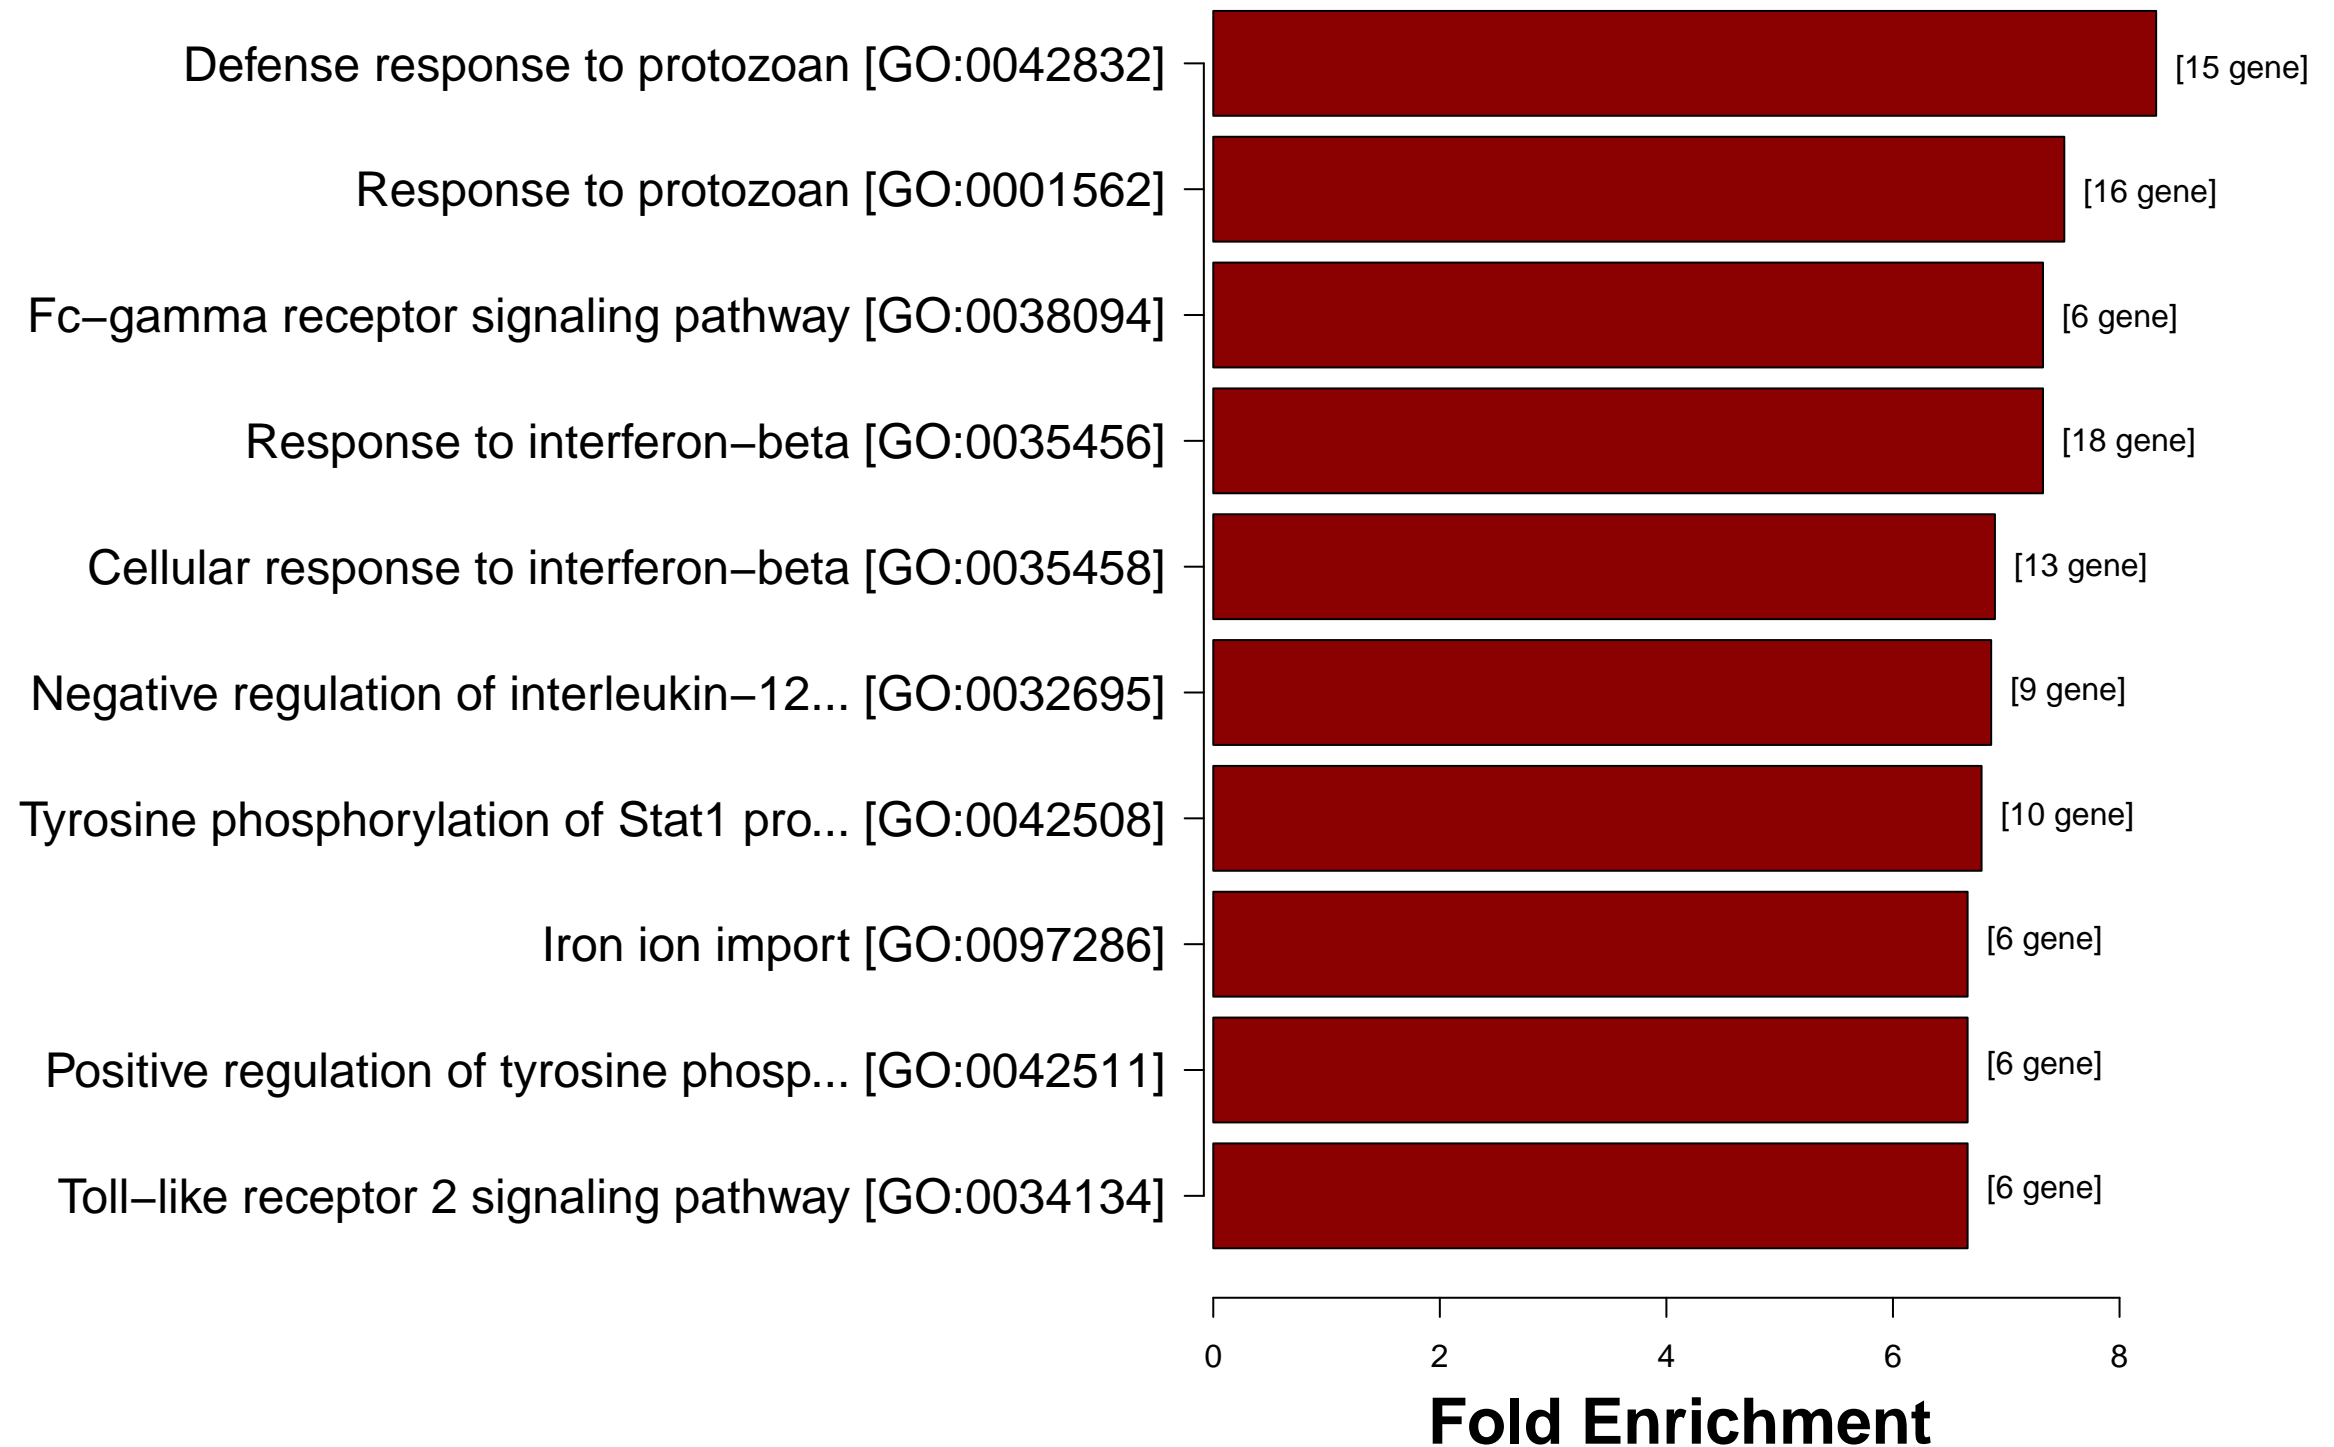

Supplement: f1 [file 4384797.f1.zip]

# Sig GO terms of DE gene–BP

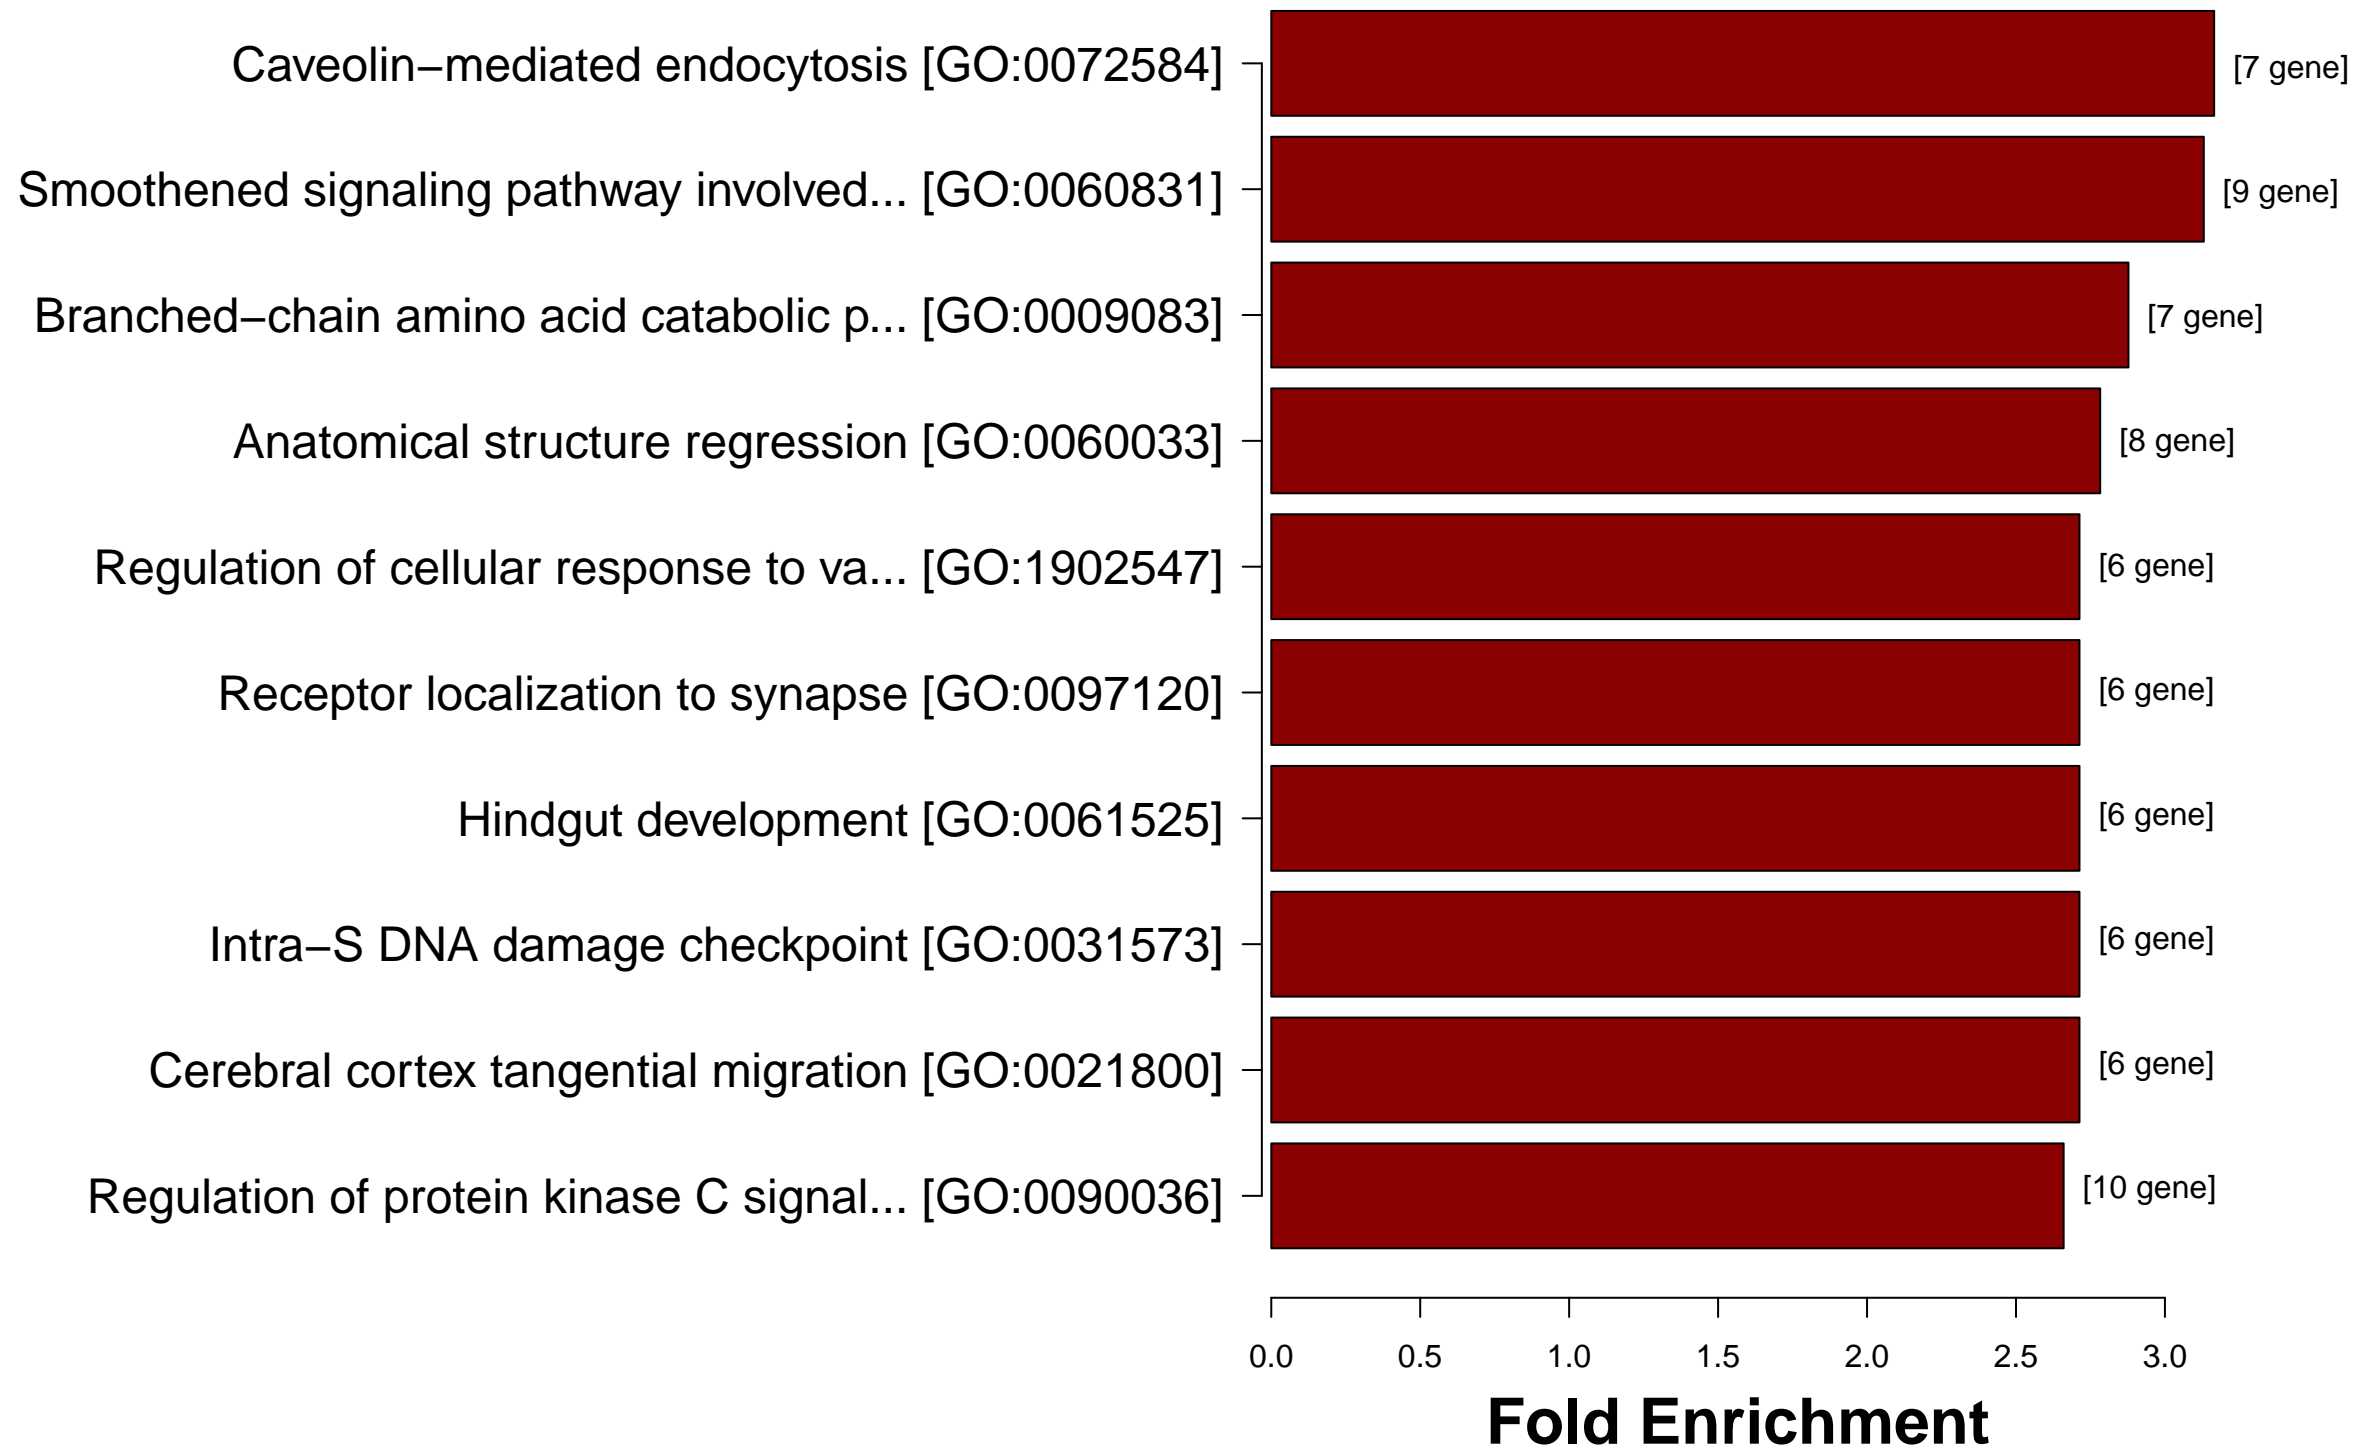

Supplement: f1 [file 4384797.f1.zip]

# Sig GO terms of DE gene-BP

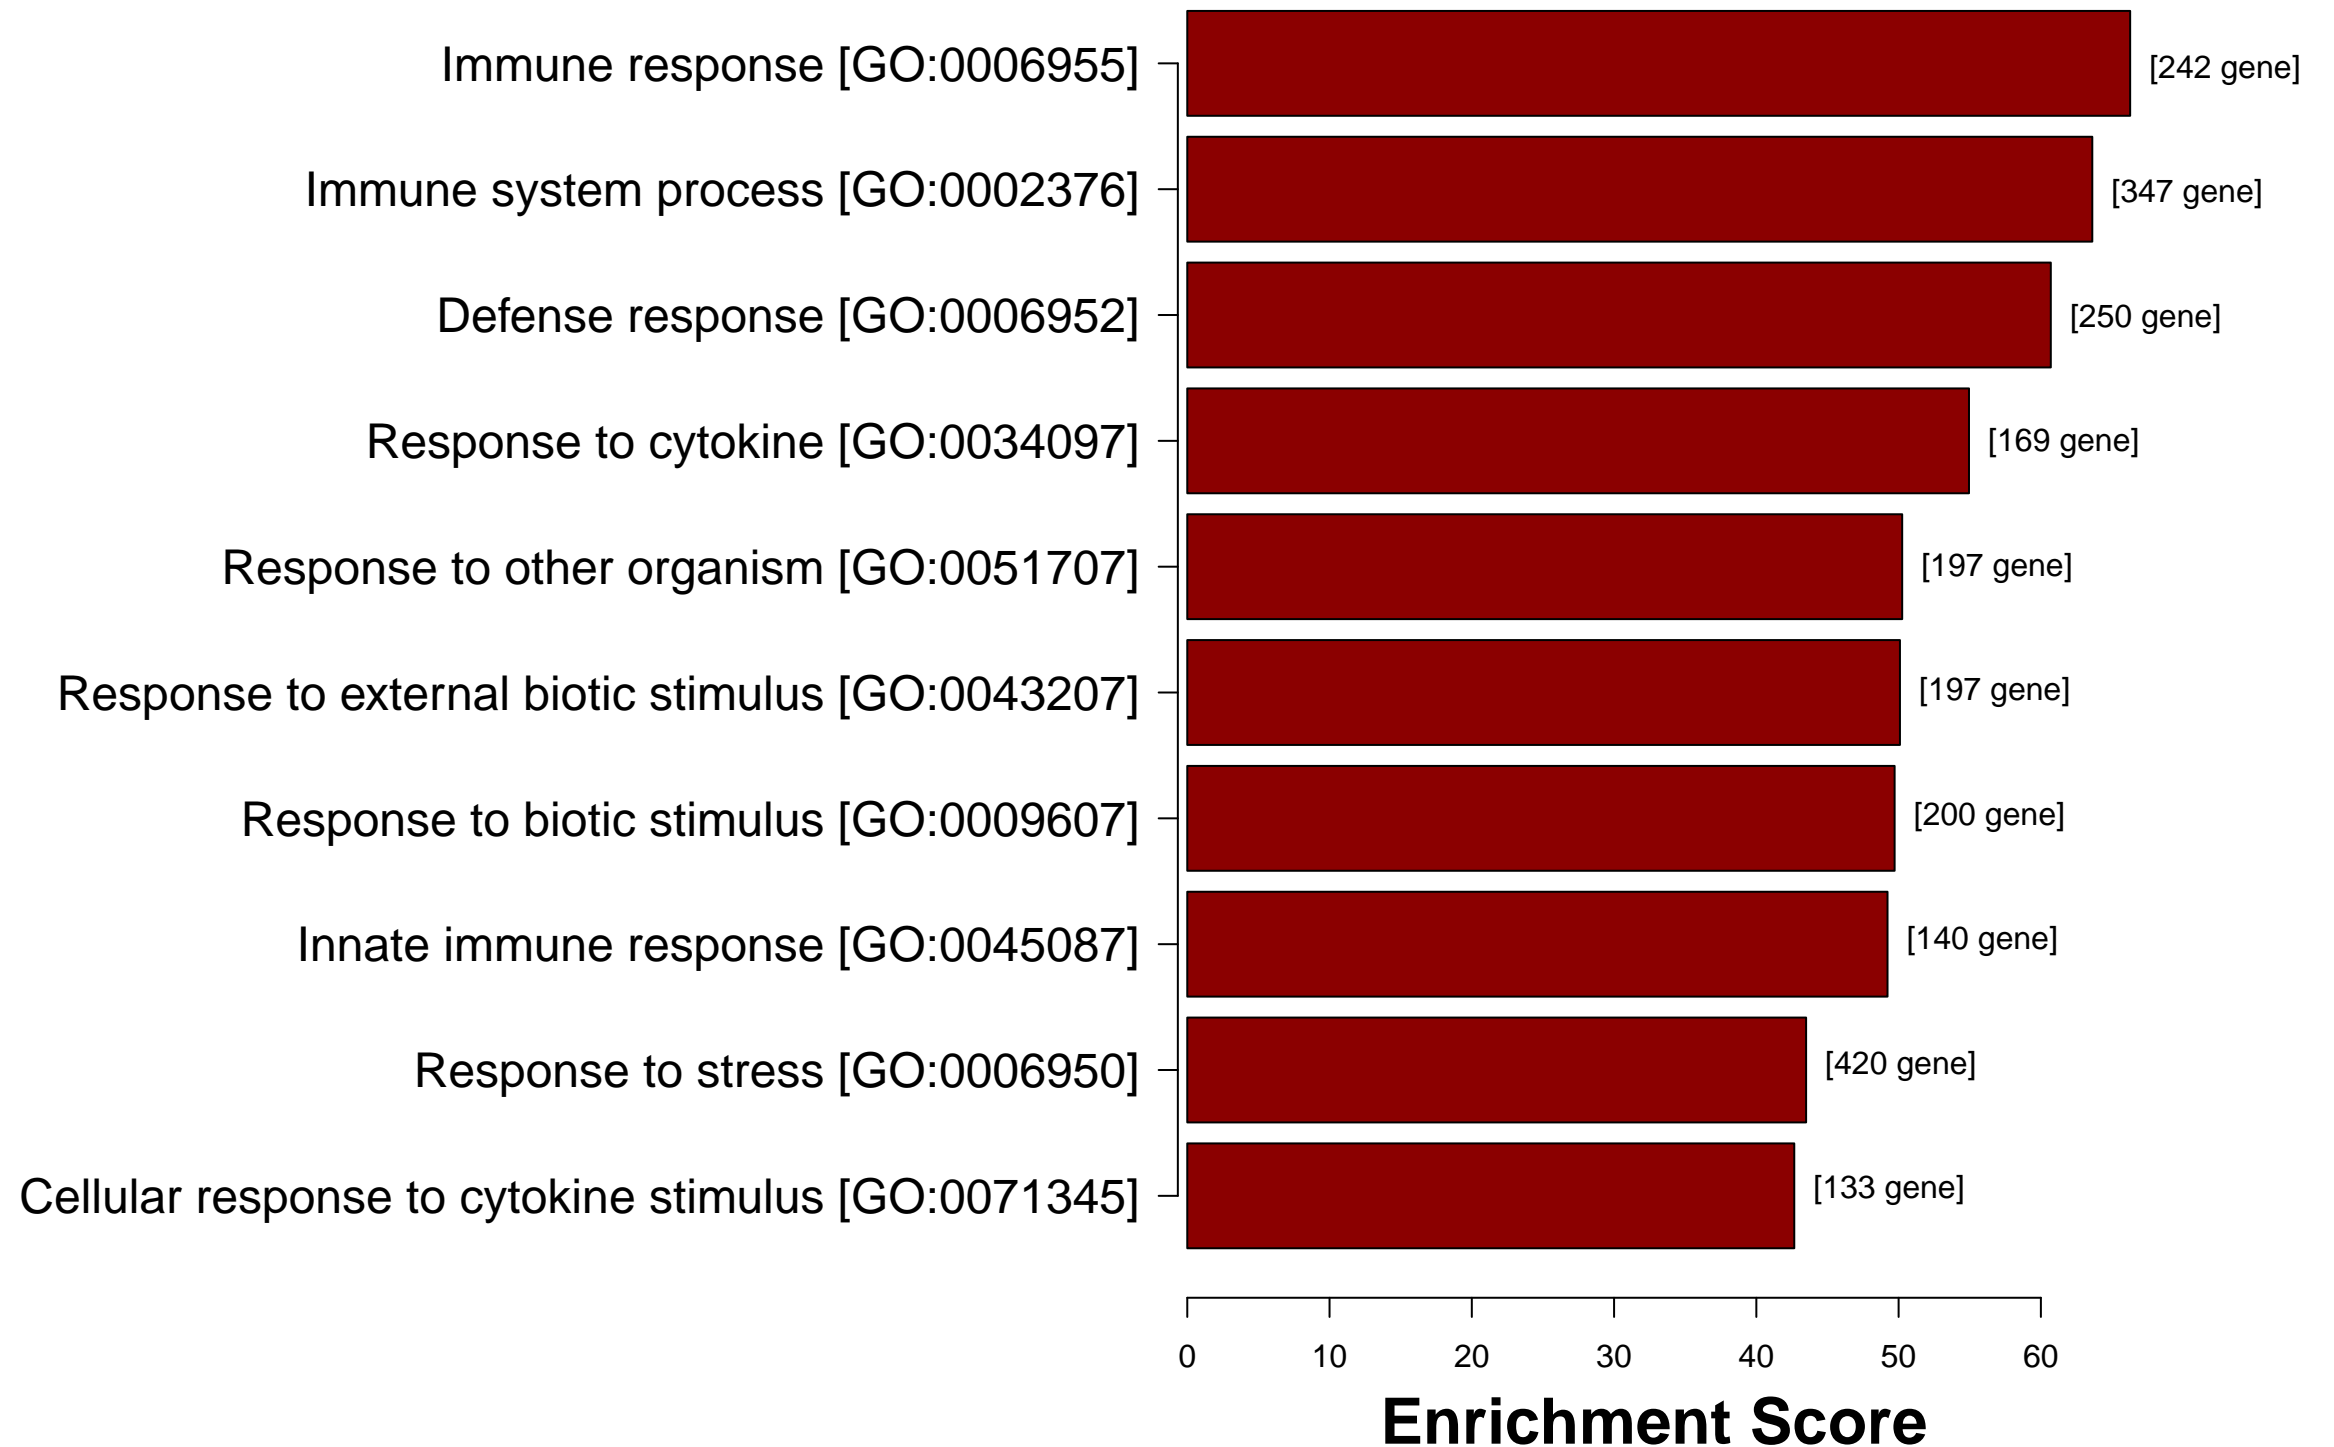

Supplement: f1 [file 4384797.f1.zip]

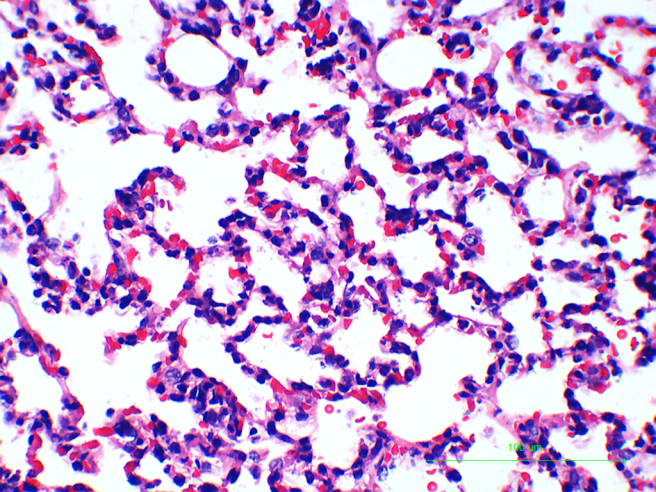

100 µm

Supplement: f1 [file 4384797.f1.zip]

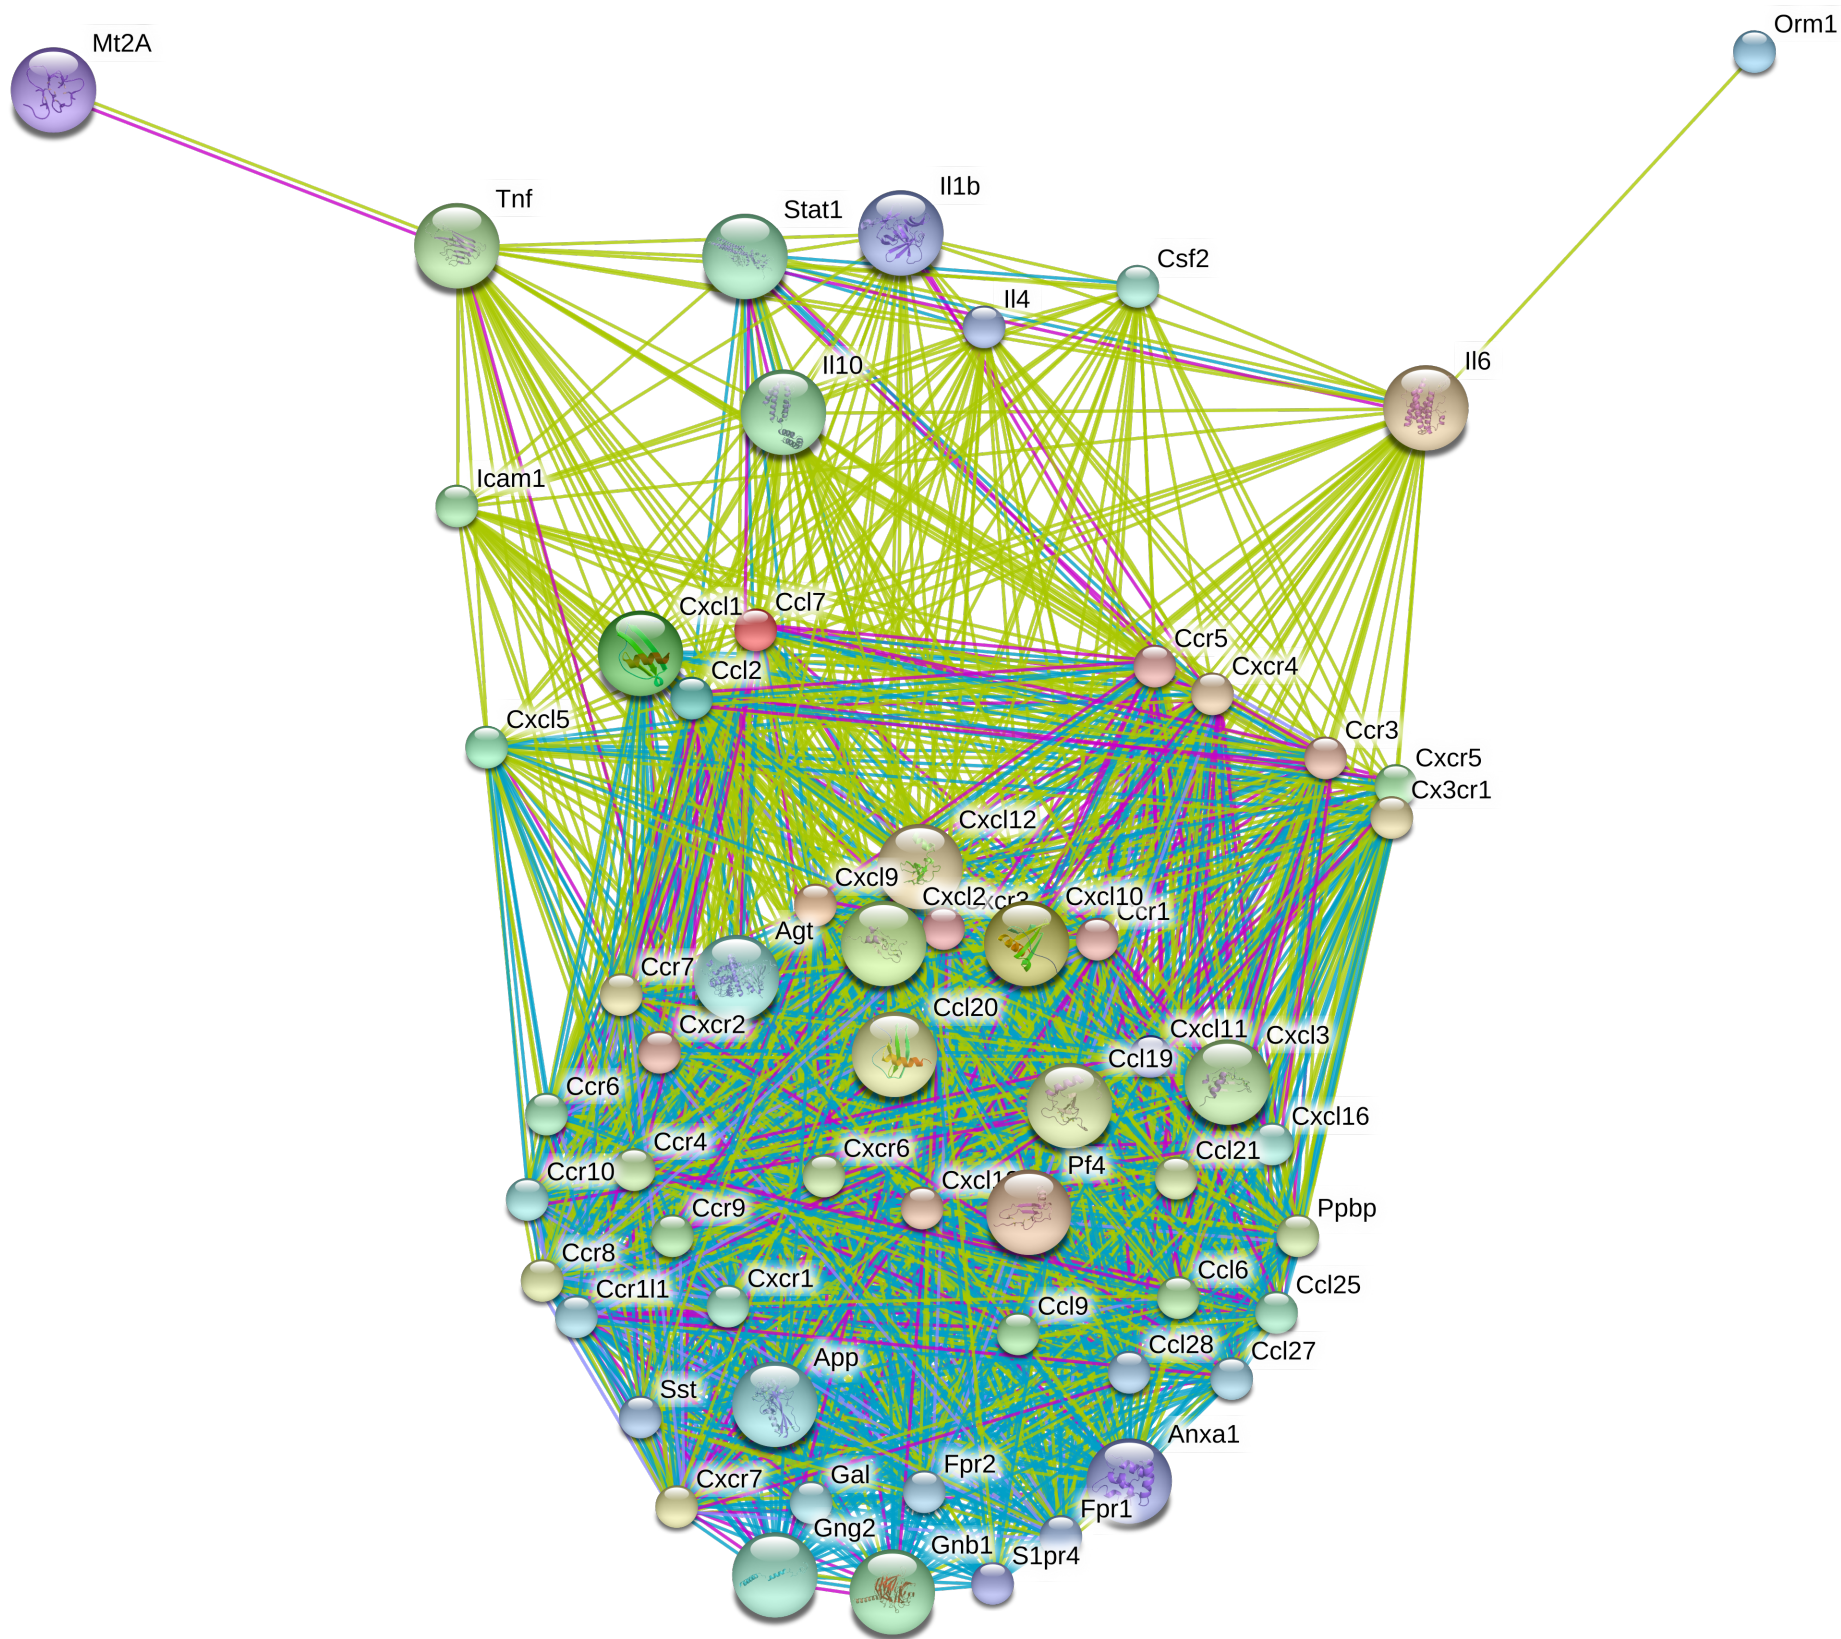

Supplement: f1 [file 4384797.f1.zip]

# Sig GO terms of DE gene-CC

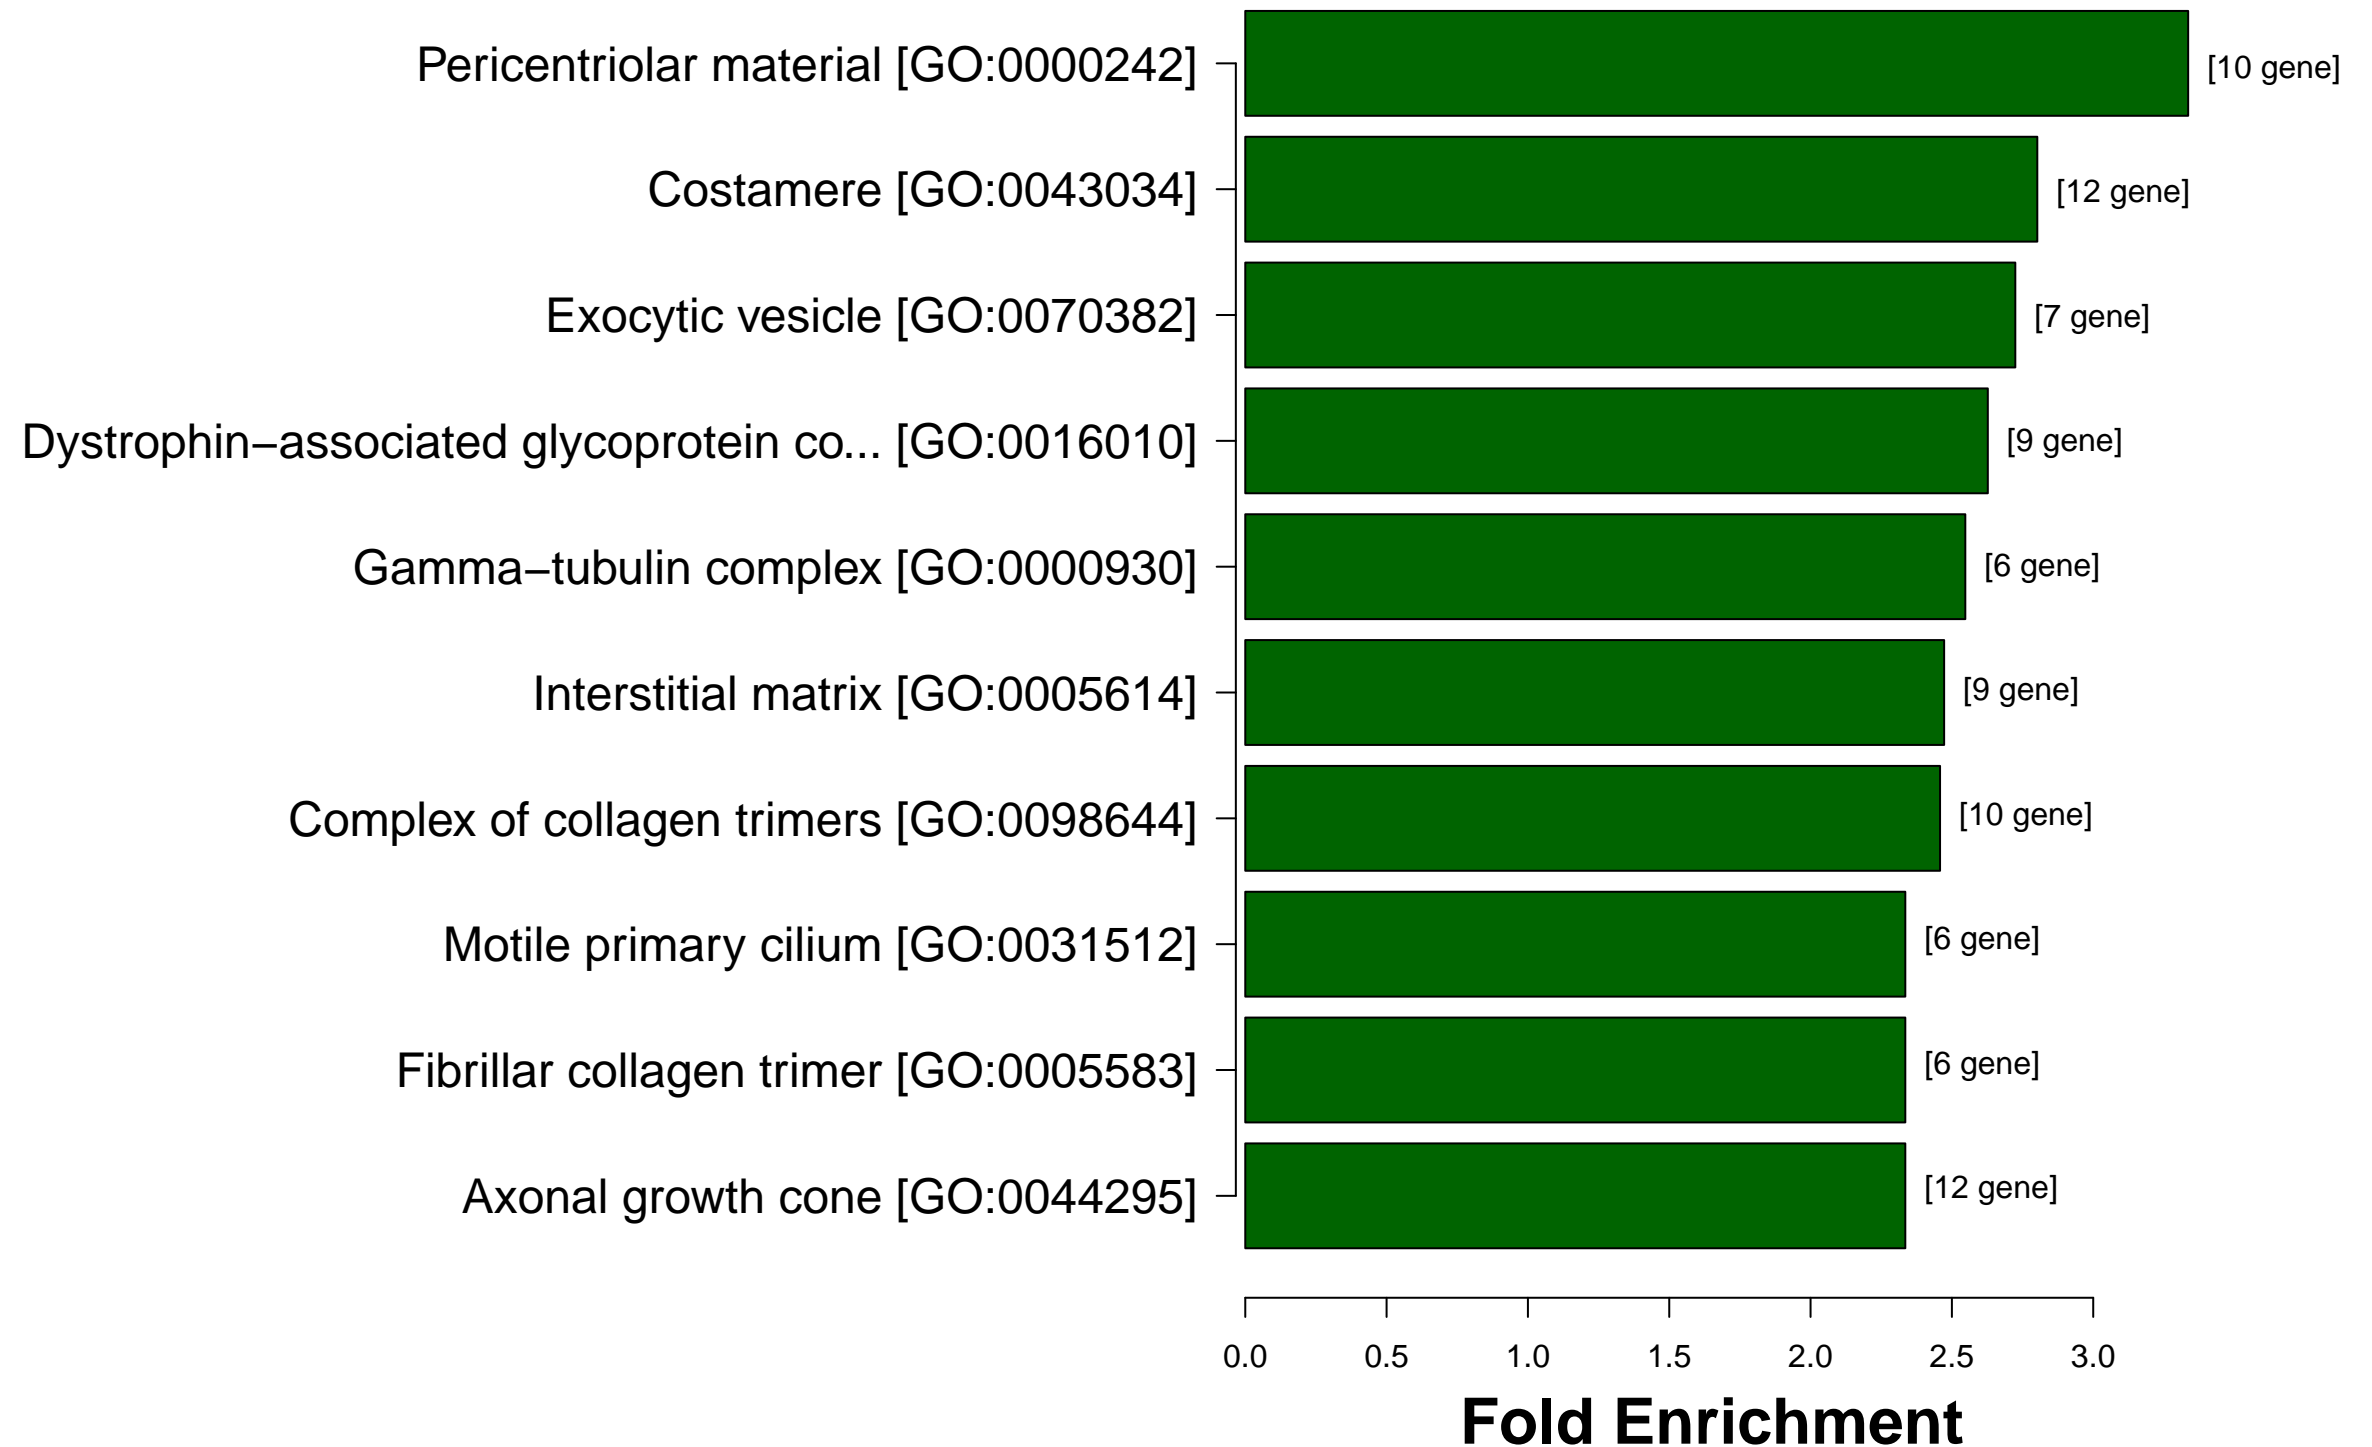

Supplement: f1 [file 4384797.f1.zip]

# Sig GO terms of DE gene-CC

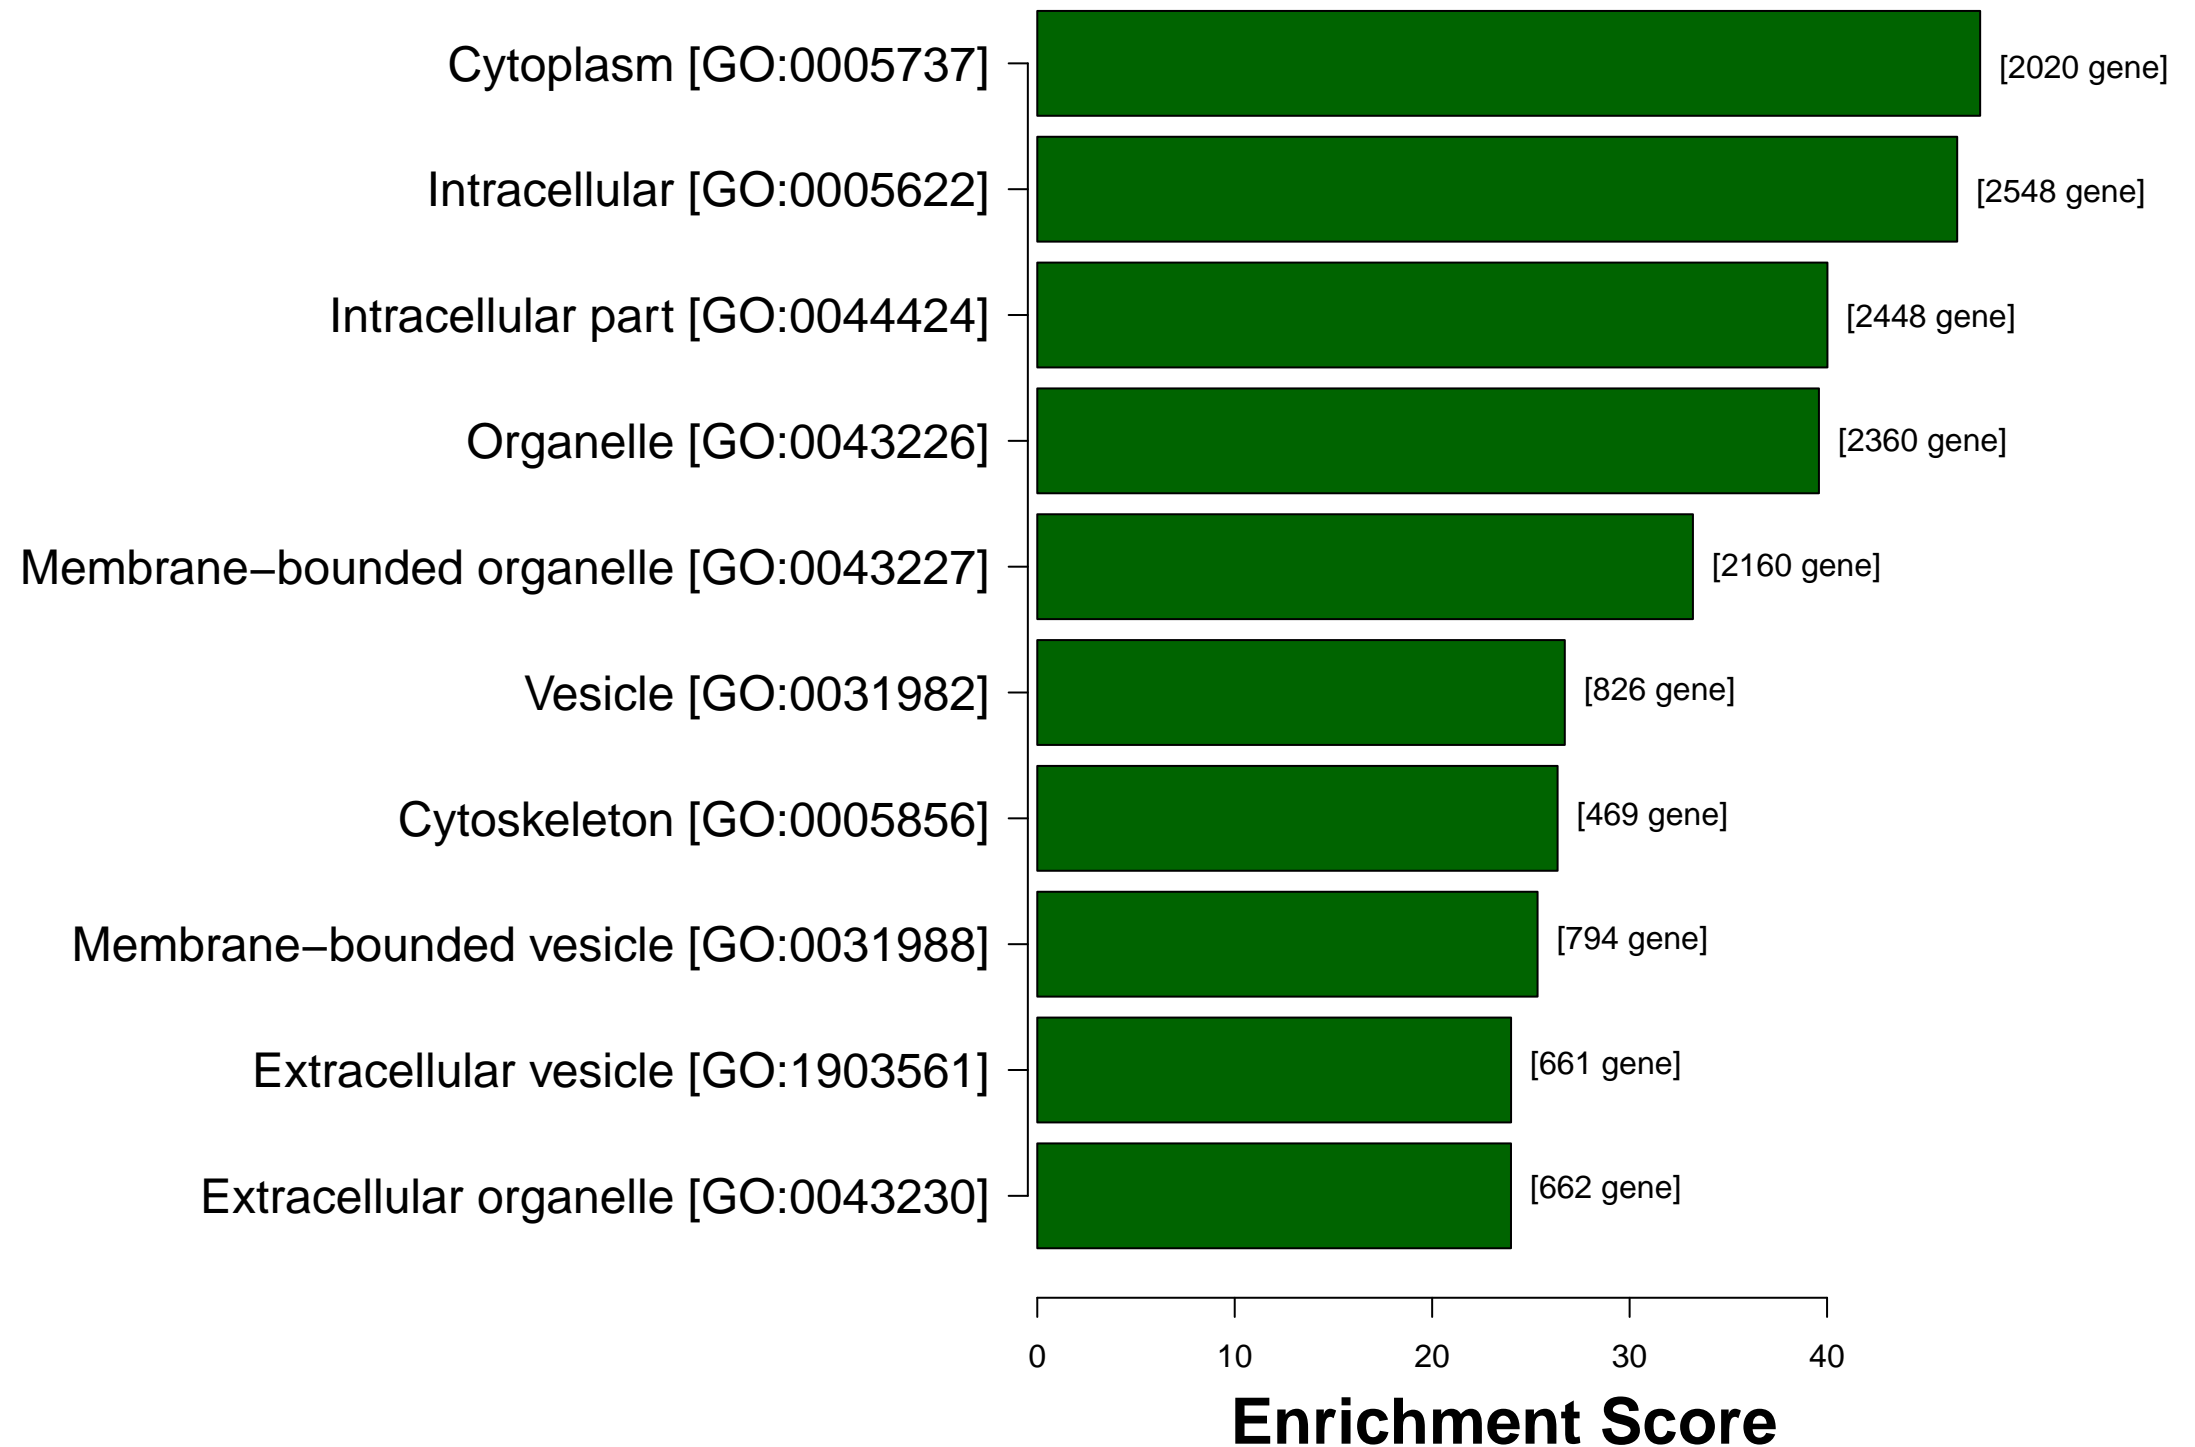

Supplement: f1 [file 4384797.f1.zip]

# Sig GO terms of DE gene-CC

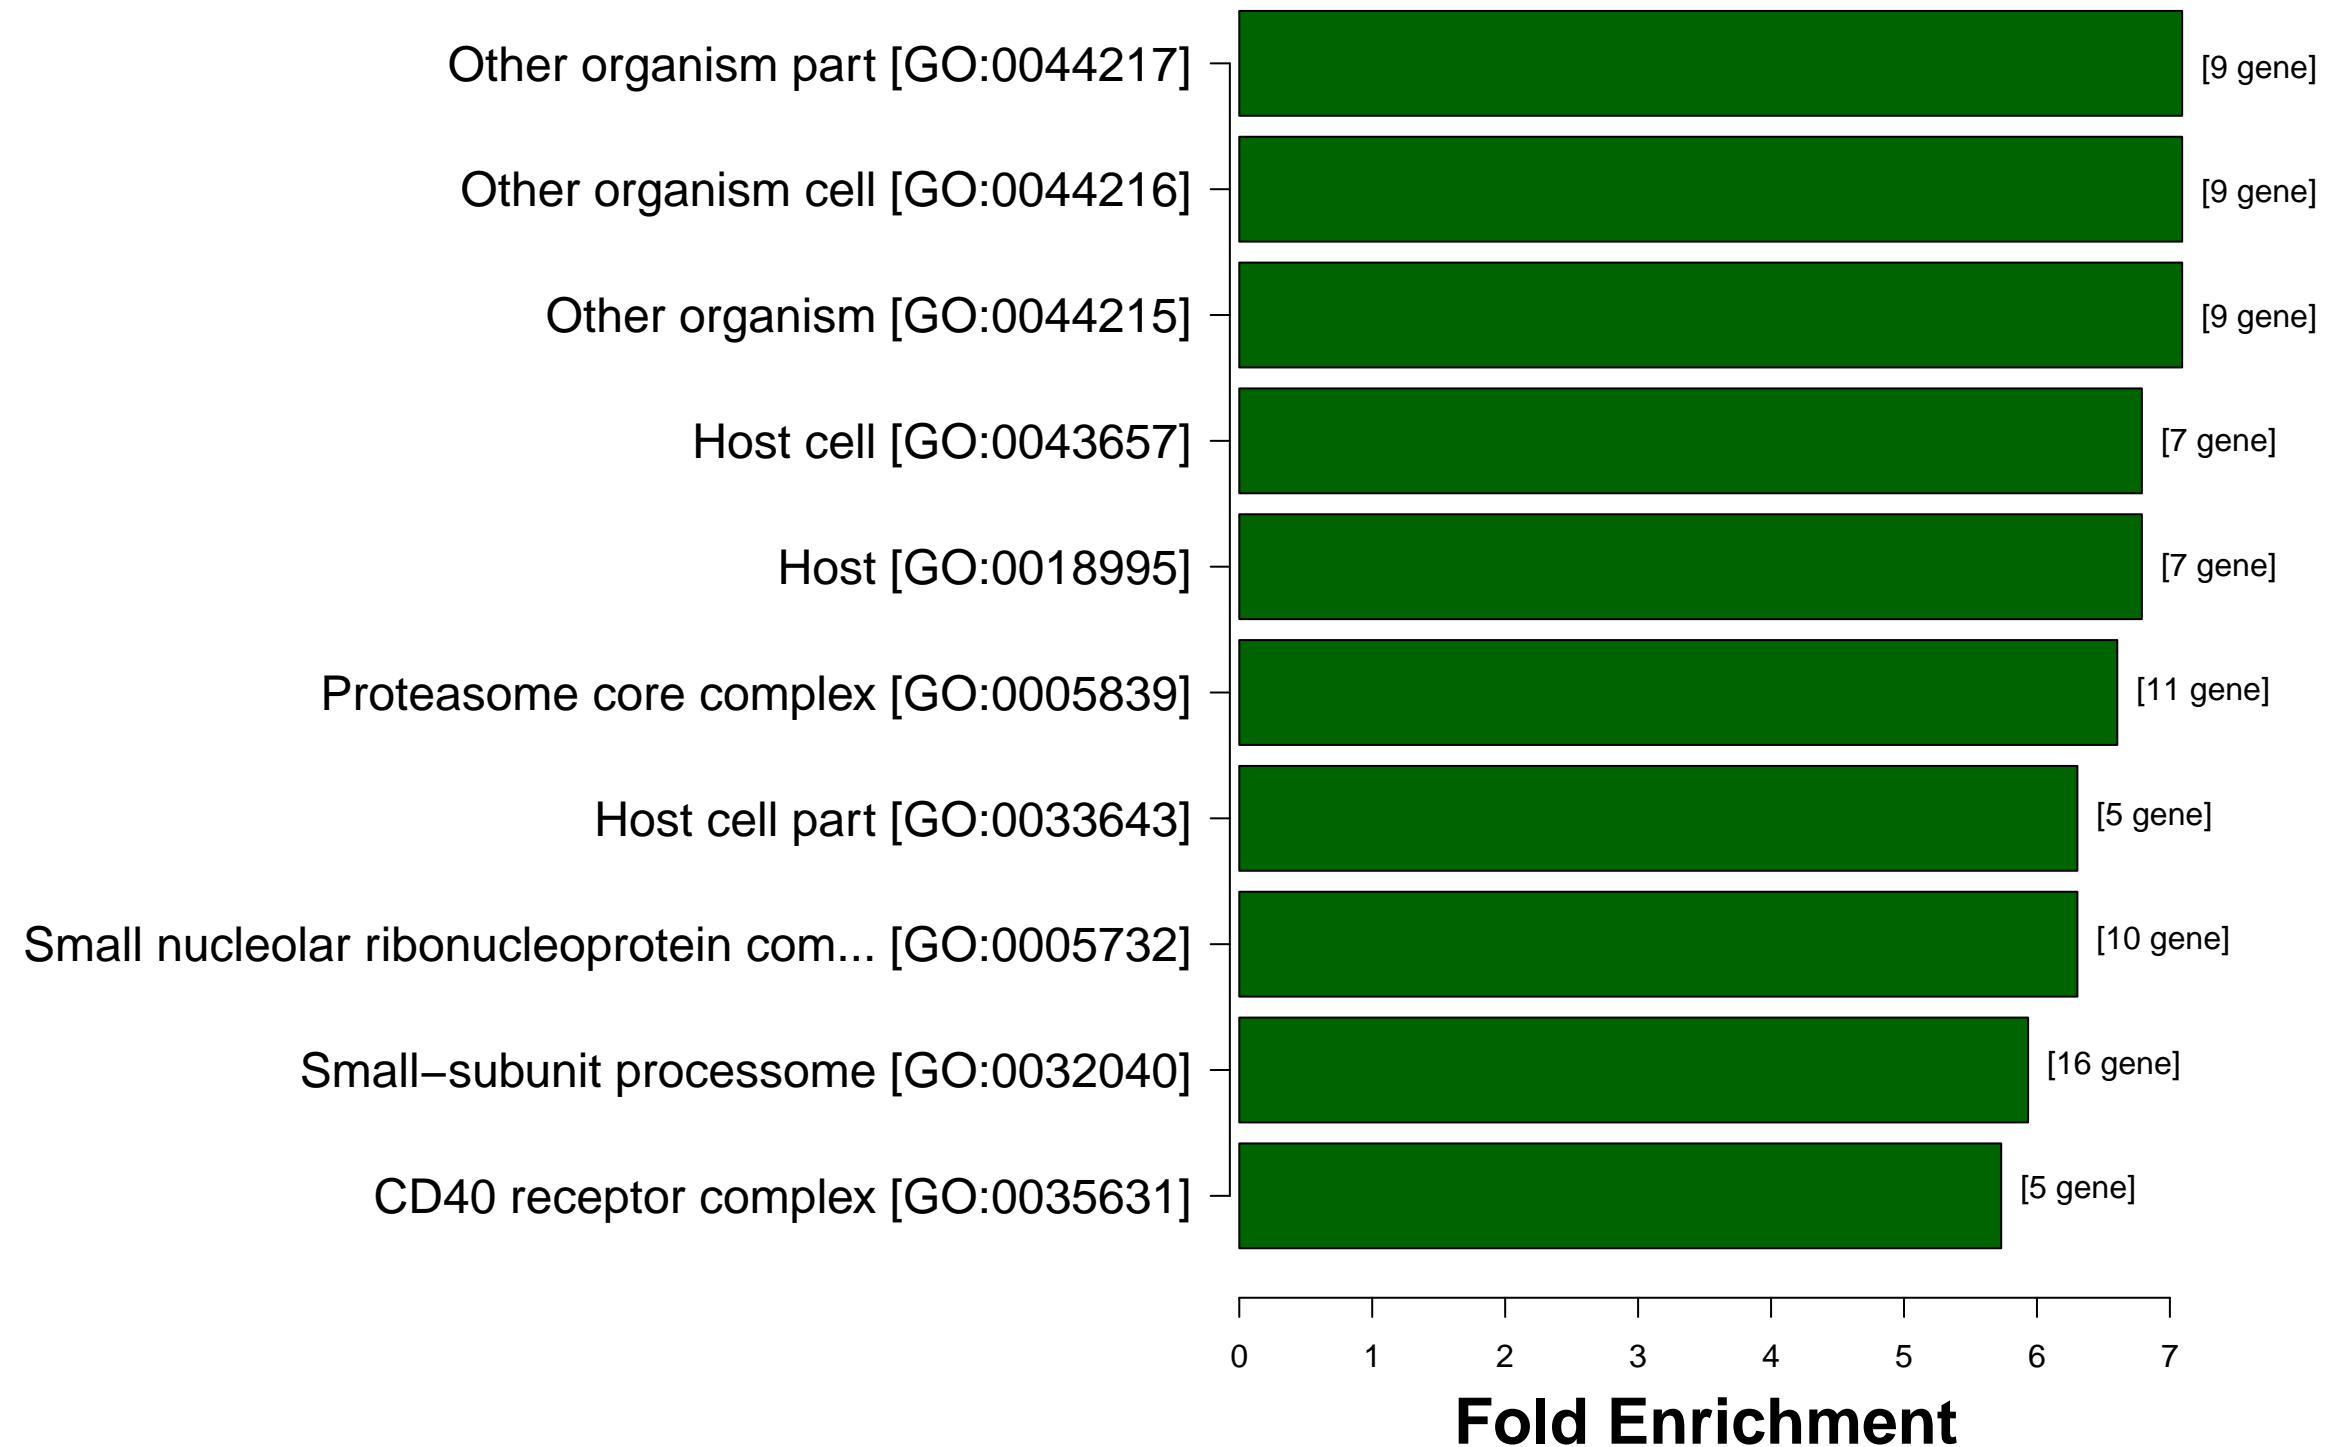

Supplement: f1 [file 4384797.f1.zip]

# Sig GO terms of DE gene–BP

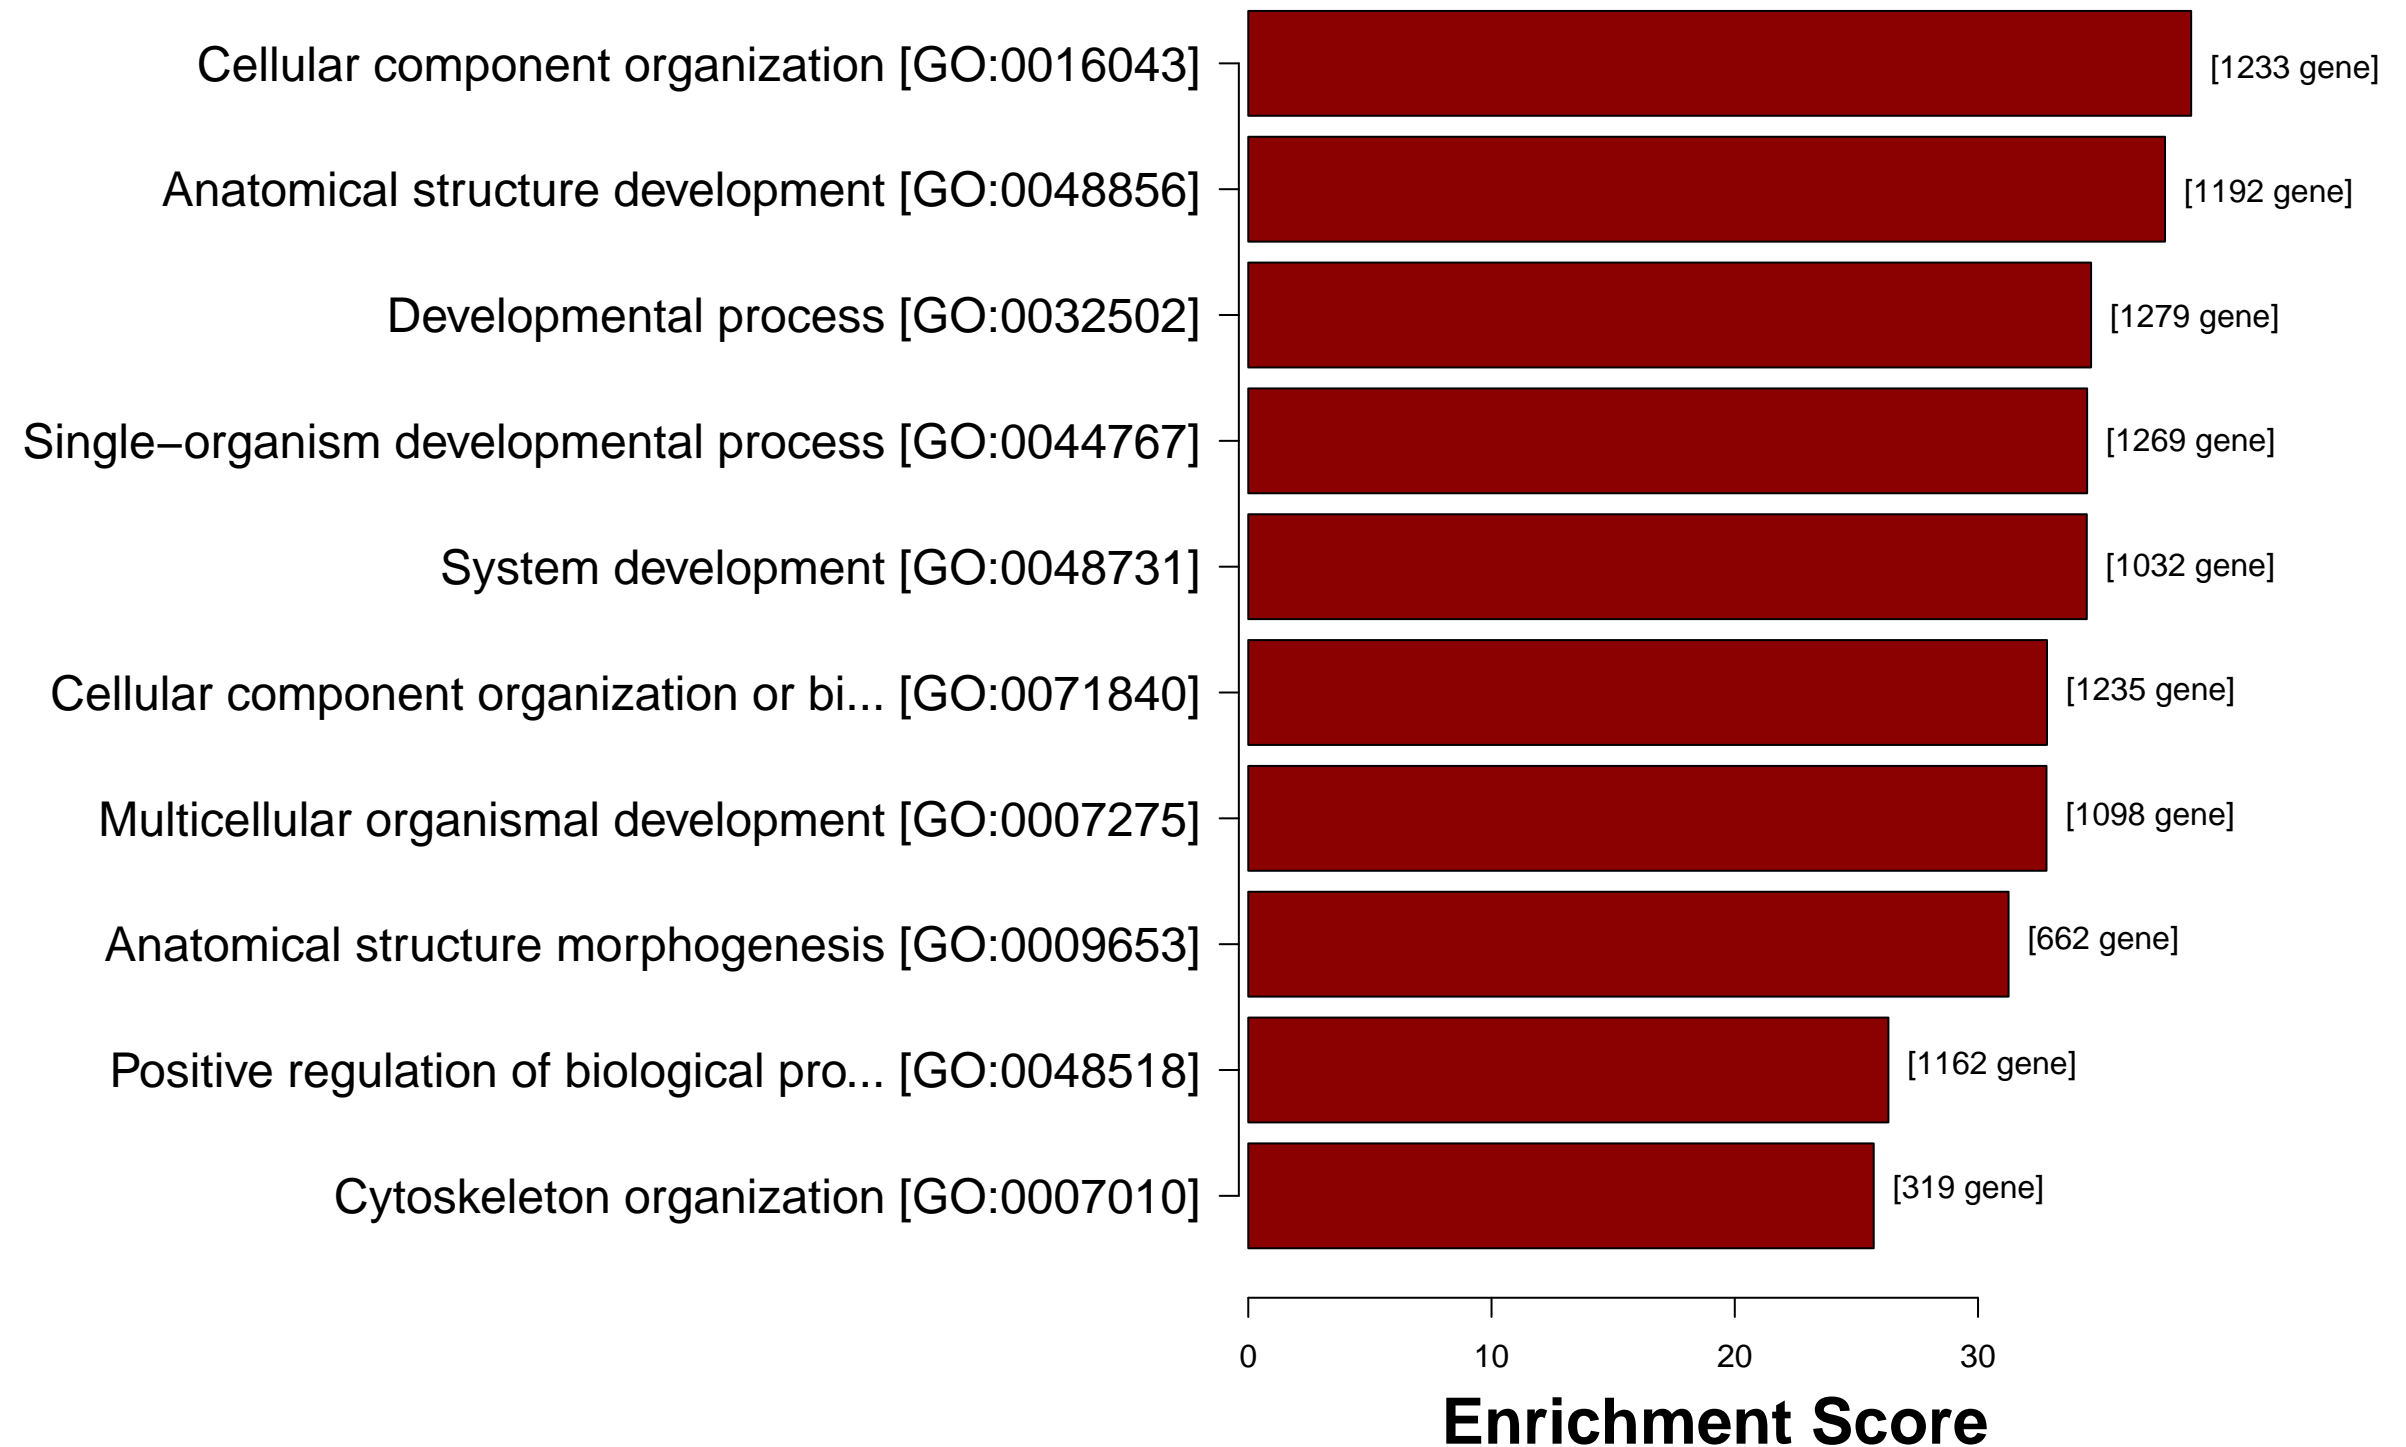

Supplement: f1 [file 4384797.f1.zip]

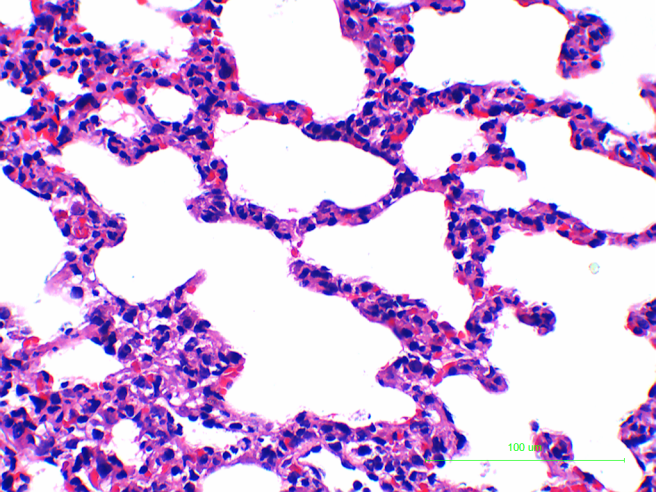

Supplement: f1 [file 4384797.f1.zip]
